# Supplementary material
Source: publisher figshare collection journal article supplement (https://acs.figshare.com/ndownloader/files/6878295)
Supplement: Supplementary file 1 [file 6878295]

 
data_Zr_1_OiPr_2
 
_audit_creation_method            'SHELXL-2014/7'
_shelx_SHELXL_version_number      '2014/7'
_chemical_name_systematic         ?
_chemical_name_common             ?
_chemical_melting_point           ?
_chemical_formula_moiety          'C43 H64 N2 O4 Zr'
_chemical_formula_sum
 'C43 H64 N2 O4 Zr' 
_chemical_formula_weight          764.18

loop_
 _atom_type_symbol
 _atom_type_description
 _atom_type_scat_dispersion_real
 _atom_type_scat_dispersion_imag
 _atom_type_scat_source
 'C'  'C'   0.0033   0.0016
 'International Tables Vol C Tables 4.2.6.8 and 6.1.1.4'
 'H'  'H'   0.0000   0.0000
 'International Tables Vol C Tables 4.2.6.8 and 6.1.1.4'
 'N'  'N'   0.0061   0.0033
 'International Tables Vol C Tables 4.2.6.8 and 6.1.1.4'
 'O'  'O'   0.0106   0.0060
 'International Tables Vol C Tables 4.2.6.8 and 6.1.1.4'
 'Zr'  'Zr'  -2.9673   0.5597
 'International Tables Vol C Tables 4.2.6.8 and 6.1.1.4'
 
_space_group_crystal_system       monoclinic
_space_group_IT_number            14
_space_group_name_H-M_alt         'P 21/c'
_space_group_name_Hall            '-P 2ybc'
 
_shelx_space_group_comment
;
The symmetry employed for this shelxl refinement is uniquely defined
by the following loop, which should always be used as a source of
symmetry information in preference to the above space-group names.
They are only intended as comments.
;
 
loop_
 _space_group_symop_operation_xyz
 'x, y, z'
 '-x, y+1/2, -z+1/2'
 '-x, -y, -z'
 'x, -y-1/2, z-1/2'
 
_cell_length_a                    14.9527(4)
_cell_length_b                    20.9673(4)
_cell_length_c                    15.1609(5)
_cell_angle_alpha                 90
_cell_angle_beta                  115.285(3)
_cell_angle_gamma                 90
_cell_volume                      4297.8(2)
_cell_formula_units_Z             4
_cell_measurement_temperature     150(2)
_cell_measurement_reflns_used   9417
_cell_measurement_theta_min     3.7390
_cell_measurement_theta_max     29.5710
 
_exptl_crystal_description        cube
_exptl_crystal_colour             yellow
_exptl_crystal_density_meas       ?
_exptl_crystal_density_method     ?
_exptl_crystal_density_diffrn     1.181          
_exptl_crystal_F_000              1632
_exptl_transmission_factor_min    ?
_exptl_transmission_factor_max    ?
_exptl_crystal_size_max           0.200
_exptl_crystal_size_mid           0.100
_exptl_crystal_size_min           0.100
_exptl_absorpt_coefficient_mu     0.295
_shelx_estimated_absorpt_T_min    0.943
_shelx_estimated_absorpt_T_max    0.971
_exptl_absorpt_correction_T_min                   0.91403
_exptl_absorpt_correction_T_max                   1.00000
_exptl_absorpt_correction_type            'multi-scan'
_exptl_absorpt_process_details
;
CrysAlisPro, Agilent Technologies,
Version 1.171.37.35 (release 13-08-2014 CrysAlis171 .NET)
(compiled Aug 13 2014,18:06:01)
Empirical absorption correction using spherical harmonics,
 implemented in SCALE3 ABSPACK scaling algorithm.
Empirical absorption correction using spherical harmonics,
 implemented in SCALE3 ABSPACK scaling algorithm.
;
_diffrn_ambient_temperature 150.00(10) 
_diffrn_ambient_environment 'N~2~'
_diffrn_source 'Enhance (Mo) X-ray Source'
_diffrn_radiation_probe 'x-ray'
_diffrn_radiation_type 'Mo K\a'
_diffrn_radiation_wavelength 0.71073
_diffrn_radiation_monochromator 'graphite'
_diffrn_measurement_device 'four-circle diffractometer'
_diffrn_measurement_device_type 'New Xcalibur, EosS2'
_diffrn_measurement_method '\w scans'
_diffrn_detector 'CCD plate'
_diffrn_detector_type 'EosS2'
_diffrn_detector_area_resol_mean 16.1468
_diffrn_reflns_number             34194
_diffrn_reflns_av_unetI/netI      0.0519
_diffrn_reflns_av_R_equivalents   0.0393
_diffrn_reflns_limit_h_min        -18
_diffrn_reflns_limit_h_max        20
_diffrn_reflns_limit_k_min        -28
_diffrn_reflns_limit_k_max        28
_diffrn_reflns_limit_l_min        -18
_diffrn_reflns_limit_l_max        21
_diffrn_reflns_theta_min          3.326
_diffrn_reflns_theta_max          30.318
_diffrn_reflns_theta_full         25.242
_diffrn_measured_fraction_theta_max   0.875
_diffrn_measured_fraction_theta_full  0.997
_diffrn_reflns_Laue_measured_fraction_max    0.875
_diffrn_reflns_Laue_measured_fraction_full   0.997
_diffrn_reflns_point_group_measured_fraction_max   0.875
_diffrn_reflns_point_group_measured_fraction_full  0.997
_reflns_number_total              11290
_reflns_number_gt                 8344
_reflns_threshold_expression      'I > 2\s(I)'
_reflns_Friedel_coverage          0.000
_reflns_Friedel_fraction_max      .
_reflns_Friedel_fraction_full     .
 
_reflns_special_details
;
 Reflections were merged by SHELXL according to the crystal
 class for the calculation of statistics and refinement.
 
 _reflns_Friedel_fraction is defined as the number of unique
 Friedel pairs measured divided by the number that would be
 possible theoretically, ignoring centric projections and
 systematic absences.
;
 
_computing_data_collection     'CrysAlisPro 1.171.38.43 (Rigaku OD, 2015)'
_computing_cell_refinement     'CrysAlisPro 1.171.38.43 (Rigaku OD, 2015)'
_computing_data_reduction      'CrysAlisPro 1.171.38.43 (Rigaku OD, 2015)'
_computing_structure_solution     
; 
 SHELXT
 Sheldrick, G. M. (2008). Acta Cryst. A64, 112-122.
;
_computing_structure_refinement   
;
 SHELXL-2014/8 (Sheldrick, 2014)
 Sheldrick GM (2008) Acta Crystallogr A64:112--122 and 
 C. B. H\"ubschle, G. M. Sheldrick and B. Dittrich
 ShelXle: a Qt graphical user interface for SHELXL
 J. Appl. Cryst., 44, (2011) 1281-1284.
;
_computing_molecular_graphics  

'ORTEP3 for Windows - Farrugia, L. J. J. Appl. Crystallogr. 1997, 30, 565'

_computing_publication_material    
;
 'WinGX publication routines, Farrugia, 
 L. J., J. Appl. Crystallogr., 1999, 32, 837-838
;  
_refine_special_details           
;
t-bu group comprising of atoms C14-C16/C14A-C16A is disordered 
over two sites in the ratio 9:1 and t-Bu group comprising of atoms 
C37-C39/C37A-C39A is disordered over two sites in the ration 8:2.
All atoms involved in the disorder have been refined with ADP restraints. 
;
_refine_ls_structure_factor_coef  Fsqd
_refine_ls_matrix_type            full
_refine_ls_weighting_scheme       calc
_refine_ls_weighting_details
'w=1/[\s^2^(Fo^2^)+(0.0344P)^2^+2.0994P] where P=(Fo^2^+2Fc^2^)/3'
_atom_sites_solution_primary      ?
_atom_sites_solution_secondary    ?
_atom_sites_solution_hydrogens    geom
_refine_ls_hydrogen_treatment     constr
_refine_ls_extinction_method      none
_refine_ls_extinction_coef        .
_refine_ls_number_reflns          11290
_refine_ls_number_parameters      530
_refine_ls_number_restraints      72
_refine_ls_R_factor_all           0.0695
_refine_ls_R_factor_gt            0.0422
_refine_ls_wR_factor_ref          0.0991
_refine_ls_wR_factor_gt           0.0873
_refine_ls_goodness_of_fit_ref    1.038
_refine_ls_restrained_S_all       1.042
_refine_ls_shift/su_max           0.002
_refine_ls_shift/su_mean          0.000
 
loop_
 _atom_site_label
 _atom_site_type_symbol
 _atom_site_fract_x
 _atom_site_fract_y
 _atom_site_fract_z
 _atom_site_U_iso_or_equiv
 _atom_site_adp_type
 _atom_site_occupancy
 _atom_site_site_symmetry_order  
 _atom_site_calc_flag
 _atom_site_refinement_flags_posn
 _atom_site_refinement_flags_adp
 _atom_site_refinement_flags_occupancy
 _atom_site_disorder_assembly
 _atom_site_disorder_group
Zr1 Zr 0.18206(2) 0.67050(2) 0.25250(2) 0.02227(6) Uani 1 1 d . . . . .
O1 O 0.20164(10) 0.75043(7) 0.32496(11) 0.0299(3) Uani 1 1 d . . . . .
N1 N 0.14502(12) 0.57578(8) 0.15556(12) 0.0242(3) Uani 1 1 d . . . . .
C1 C 0.26248(16) 0.80043(10) 0.38142(16) 0.0312(5) Uani 1 1 d . . . . .
H1 H 0.2316 0.8186 0.4229 0.037 Uiso 1 1 calc R U . . .
O2 O 0.29514(10) 0.67819(7) 0.22142(10) 0.0286(3) Uani 1 1 d . . . . .
N2 N 0.08479(12) 0.69765(8) 0.08346(12) 0.0246(4) Uani 1 1 d . . . . .
C2 C 0.2688(2) 0.85276(13) 0.3157(2) 0.0521(7) Uani 1 1 d . . . . .
H2A H 0.3004 0.8361 0.2755 0.078 Uiso 1 1 calc R U . . .
H2B H 0.3081 0.8882 0.3556 0.078 Uiso 1 1 calc R U . . .
H2C H 0.2021 0.8679 0.2733 0.078 Uiso 1 1 calc R U . . .
O3 O 0.23944(10) 0.60230(6) 0.35543(10) 0.0269(3) Uani 1 1 d . . . . .
C3 C 0.36357(17) 0.77450(13) 0.44819(18) 0.0429(6) Uani 1 1 d . . . . .
H3A H 0.3563 0.7412 0.4900 0.064 Uiso 1 1 calc R U . . .
H3B H 0.4047 0.8091 0.4889 0.064 Uiso 1 1 calc R U . . .
H3C H 0.3951 0.7565 0.4089 0.064 Uiso 1 1 calc R U . . .
O4 O 0.04076(10) 0.65924(7) 0.24373(10) 0.0276(3) Uani 1 1 d . . . . .
C4 C 0.37259(16) 0.66680(11) 0.19401(17) 0.0340(5) Uani 1 1 d . . . . .
H4 H 0.3438 0.6584 0.1222 0.041 Uiso 1 1 calc R U . . .
C5 C 0.43866(19) 0.72442(14) 0.2165(2) 0.0513(7) Uani 1 1 d . . . . .
H5A H 0.3995 0.7616 0.1823 0.077 Uiso 1 1 calc R U . . .
H5B H 0.4909 0.7168 0.1949 0.077 Uiso 1 1 calc R U . . .
H5C H 0.4686 0.7324 0.2869 0.077 Uiso 1 1 calc R U . . .
C6 C 0.4293(2) 0.60818(14) 0.2478(2) 0.0581(8) Uani 1 1 d . . . . .
H6A H 0.4602 0.6167 0.3181 0.087 Uiso 1 1 calc R U . . .
H6B H 0.4806 0.5980 0.2260 0.087 Uiso 1 1 calc R U . . .
H6C H 0.3837 0.5721 0.2341 0.087 Uiso 1 1 calc R U . . .
C7 C 0.24731(14) 0.53997(9) 0.36991(15) 0.0242(4) Uani 1 1 d . . . . .
C8 C 0.20511(15) 0.49772(10) 0.28989(15) 0.0274(4) Uani 1 1 d . . . . .
C9 C 0.21135(16) 0.43128(10) 0.30583(16) 0.0303(5) Uani 1 1 d . . . . .
H9 H 0.1818 0.4036 0.2514 0.036 Uiso 1 1 calc R U . . .
C10 C 0.25866(15) 0.40537(10) 0.39726(16) 0.0288(4) Uani 1 1 d . . . . .
C11 C 0.30145(15) 0.44867(10) 0.47543(16) 0.0290(5) Uani 1 1 d . . . . .
H11 H 0.3356 0.4316 0.5392 0.035 Uiso 1 1 calc R U . . .
C12 C 0.29710(14) 0.51451(10) 0.46546(15) 0.0259(4) Uani 1 1 d . . . . .
C13 C 0.26747(16) 0.33339(10) 0.41673(17) 0.0323(5) Uani 1 1 d . . . . .
C14 C 0.1997(3) 0.29461(15) 0.3290(3) 0.0492(9) Uani 0.919(7) 1 d . U P A 1
H14D H 0.1310 0.3078 0.3097 0.074 Uiso 0.919(7) 1 calc R U P A 1
H14E H 0.2066 0.2492 0.3461 0.074 Uiso 0.919(7) 1 calc R U P A 1
H14F H 0.2176 0.3018 0.2748 0.074 Uiso 0.919(7) 1 calc R U P A 1
C15 C 0.2394(4) 0.31778(16) 0.5007(3) 0.0600(11) Uani 0.919(7) 1 d . U P A 1
H15D H 0.1718 0.3325 0.4839 0.090 Uiso 0.919(7) 1 calc R U P A 1
H15E H 0.2852 0.3393 0.5603 0.090 Uiso 0.919(7) 1 calc R U P A 1
H15F H 0.2432 0.2716 0.5116 0.090 Uiso 0.919(7) 1 calc R U P A 1
C16 C 0.3737(2) 0.31276(14) 0.4455(4) 0.0700(14) Uani 0.919(7) 1 d . U P A 1
H16D H 0.3802 0.2670 0.4603 0.105 Uiso 0.919(7) 1 calc R U P A 1
H16E H 0.4178 0.3367 0.5034 0.105 Uiso 0.919(7) 1 calc R U P A 1
H16F H 0.3917 0.3213 0.3916 0.105 Uiso 0.919(7) 1 calc R U P A 1
C14A C 0.166(3) 0.3068(16) 0.355(3) 0.047(9) Uani 0.081(7) 1 d . U P A 2
H14A H 0.1460 0.3191 0.2868 0.070 Uiso 0.081(7) 1 calc R U P A 2
H14B H 0.1188 0.3237 0.3778 0.070 Uiso 0.081(7) 1 calc R U P A 2
H14C H 0.1681 0.2602 0.3602 0.070 Uiso 0.081(7) 1 calc R U P A 2
C15A C 0.306(4) 0.3148(17) 0.511(3) 0.064(12) Uani 0.081(7) 1 d . U P A 2
H15A H 0.2719 0.3371 0.5450 0.096 Uiso 0.081(7) 1 calc R U P A 2
H15B H 0.3766 0.3251 0.5428 0.096 Uiso 0.081(7) 1 calc R U P A 2
H15C H 0.2972 0.2686 0.5147 0.096 Uiso 0.081(7) 1 calc R U P A 2
C16A C 0.326(3) 0.3007(16) 0.356(4) 0.055(11) Uani 0.081(7) 1 d . U P A 2
H16A H 0.3744 0.2698 0.3984 0.082 Uiso 0.081(7) 1 calc R U P A 2
H16B H 0.3596 0.3341 0.3368 0.082 Uiso 0.081(7) 1 calc R U P A 2
H16C H 0.2777 0.2790 0.2981 0.082 Uiso 0.081(7) 1 calc R U P A 2
C17 C 0.34401(15) 0.55951(10) 0.55377(15) 0.0290(5) Uani 1 1 d . . . . .
C18 C 0.26557(17) 0.60418(11) 0.56022(16) 0.0357(5) Uani 1 1 d . . . . .
H18A H 0.2140 0.5788 0.5674 0.054 Uiso 1 1 calc R U . . .
H18B H 0.2359 0.6299 0.5006 0.054 Uiso 1 1 calc R U . . .
H18C H 0.2967 0.6324 0.6168 0.054 Uiso 1 1 calc R U . . .
C19 C 0.42643(16) 0.59829(11) 0.54403(17) 0.0372(5) Uani 1 1 d . . . . .
H19A H 0.3988 0.6225 0.4829 0.056 Uiso 1 1 calc R U . . .
H19B H 0.4778 0.5693 0.5439 0.056 Uiso 1 1 calc R U . . .
H19C H 0.4554 0.6279 0.5991 0.056 Uiso 1 1 calc R U . . .
C20 C 0.39119(18) 0.52262(11) 0.65038(17) 0.0406(6) Uani 1 1 d . . . . .
H20A H 0.4174 0.5528 0.7048 0.061 Uiso 1 1 calc R U . . .
H20B H 0.4451 0.4960 0.6506 0.061 Uiso 1 1 calc R U . . .
H20C H 0.3412 0.4955 0.6573 0.061 Uiso 1 1 calc R U . . .
C21 C 0.15757(15) 0.51825(10) 0.18955(15) 0.0288(4) Uani 1 1 d . . . . .
H21 H 0.1322 0.4853 0.1424 0.035 Uiso 1 1 calc R U . . .
C22 C 0.10750(14) 0.58468(10) 0.05232(15) 0.0250(4) Uani 1 1 d . . . . .
C23 C 0.10157(16) 0.53605(11) -0.01350(16) 0.0321(5) Uani 1 1 d . . . . .
H23 H 0.1210 0.4939 0.0098 0.038 Uiso 1 1 calc R U . . .
C24 C 0.06778(17) 0.54886(11) -0.11170(17) 0.0368(5) Uani 1 1 d . . . . .
H24 H 0.0641 0.5154 -0.1553 0.044 Uiso 1 1 calc R U . . .
C25 C 0.03913(17) 0.60983(11) -0.14746(16) 0.0359(5) Uani 1 1 d . . . . .
H25 H 0.0158 0.6182 -0.2152 0.043 Uiso 1 1 calc R U . . .
C26 C 0.04483(16) 0.65844(11) -0.08366(16) 0.0319(5) Uani 1 1 d . . . . .
H26 H 0.0250 0.7004 -0.1078 0.038 Uiso 1 1 calc R U . . .
C27 C 0.07945(14) 0.64630(10) 0.01581(15) 0.0244(4) Uani 1 1 d . . . . .
C28 C 0.13421(16) 0.75541(10) 0.06647(16) 0.0305(5) Uani 1 1 d . . . . .
H28A H 0.1985 0.7433 0.0688 0.046 Uiso 1 1 calc R U . . .
H28B H 0.1439 0.7872 0.1172 0.046 Uiso 1 1 calc R U . . .
H28C H 0.0926 0.7735 0.0023 0.046 Uiso 1 1 calc R U . . .
C29 C -0.01887(14) 0.71655(10) 0.06547(15) 0.0276(4) Uani 1 1 d . . . . .
H29A H -0.0148 0.7532 0.1082 0.033 Uiso 1 1 calc R U . . .
H29B H -0.0539 0.7313 -0.0029 0.033 Uiso 1 1 calc R U . . .
C30 C -0.08003(14) 0.66533(10) 0.08241(15) 0.0264(4) Uani 1 1 d . . . . .
C31 C -0.04949(14) 0.64234(10) 0.17744(15) 0.0259(4) Uani 1 1 d . . . . .
C32 C -0.11488(15) 0.60527(10) 0.20175(16) 0.0294(5) Uani 1 1 d . . . . .
C33 C -0.20634(16) 0.58981(10) 0.12522(17) 0.0338(5) Uani 1 1 d . . . . .
H33 H -0.2508 0.5645 0.1400 0.041 Uiso 1 1 calc R U . . .
C34 C -0.23631(15) 0.60927(11) 0.02858(17) 0.0344(5) Uani 1 1 d . . . . .
C35 C -0.17156(15) 0.64781(11) 0.00865(17) 0.0316(5) Uani 1 1 d . . . . .
H35 H -0.1898 0.6625 -0.0561 0.038 Uiso 1 1 calc R U . . .
C36 C -0.33973(17) 0.59066(13) -0.0500(2) 0.0458(6) Uani 1 1 d . . . . .
C37 C -0.3355(16) 0.5761(14) -0.1478(14) 0.065(6) Uani 0.209(15) 1 d . U P B 1
H37A H -0.2906 0.5402 -0.1393 0.097 Uiso 0.209(15) 1 calc R U P B 1
H37B H -0.3115 0.6137 -0.1694 0.097 Uiso 0.209(15) 1 calc R U P B 1
H37C H -0.4018 0.5650 -0.1968 0.097 Uiso 0.209(15) 1 calc R U P B 1
C38 C -0.4090(18) 0.6445(15) -0.065(2) 0.094(9) Uani 0.209(15) 1 d . U P B 1
H38A H -0.4696 0.6373 -0.1243 0.140 Uiso 0.209(15) 1 calc R U P B 1
H38B H -0.3778 0.6843 -0.0711 0.140 Uiso 0.209(15) 1 calc R U P B 1
H38C H -0.4252 0.6475 -0.0088 0.140 Uiso 0.209(15) 1 calc R U P B 1
C39 C -0.378(2) 0.5279(14) -0.028(2) 0.083(8) Uani 0.209(15) 1 d . U P B 1
H39A H -0.4337 0.5127 -0.0864 0.124 Uiso 0.209(15) 1 calc R U P B 1
H39B H -0.3988 0.5346 0.0245 0.124 Uiso 0.209(15) 1 calc R U P B 1
H39C H -0.3245 0.4960 -0.0068 0.124 Uiso 0.209(15) 1 calc R U P B 1
C38A C -0.4180(4) 0.6170(4) -0.0196(6) 0.079(2) Uani 0.791(15) 1 d . U P B 2
H38D H -0.4841 0.6064 -0.0695 0.118 Uiso 0.791(15) 1 calc R U P B 2
H38E H -0.4112 0.6635 -0.0126 0.118 Uiso 0.791(15) 1 calc R U P B 2
H38F H -0.4087 0.5981 0.0429 0.118 Uiso 0.791(15) 1 calc R U P B 2
C39A C -0.3511(4) 0.5189(3) -0.0566(6) 0.084(3) Uani 0.791(15) 1 d . U P B 2
H39D H -0.3387 0.5016 0.0077 0.126 Uiso 0.791(15) 1 calc R U P B 2
H39E H -0.3035 0.5006 -0.0782 0.126 Uiso 0.791(15) 1 calc R U P B 2
H39F H -0.4184 0.5079 -0.1034 0.126 Uiso 0.791(15) 1 calc R U P B 2
C37A C -0.3586(5) 0.6185(6) -0.1497(4) 0.100(3) Uani 0.791(15) 1 d . U P B 2
H37D H -0.3082 0.6027 -0.1695 0.150 Uiso 0.791(15) 1 calc R U P B 2
H37E H -0.3554 0.6651 -0.1455 0.150 Uiso 0.791(15) 1 calc R U P B 2
H37F H -0.4242 0.6054 -0.1979 0.150 Uiso 0.791(15) 1 calc R U P B 2
C40 C -0.08967(17) 0.58737(11) 0.30783(17) 0.0344(5) Uani 1 1 d . . . . .
C41 C -0.1736(2) 0.55039(14) 0.3182(2) 0.0501(7) Uani 1 1 d . . . . .
H41A H -0.1854 0.5103 0.2818 0.075 Uiso 1 1 calc R U . . .
H41B H -0.2340 0.5762 0.2923 0.075 Uiso 1 1 calc R U . . .
H41C H -0.1547 0.5412 0.3873 0.075 Uiso 1 1 calc R U . . .
C42 C -0.0743(2) 0.64941(13) 0.3667(2) 0.0475(7) Uani 1 1 d . . . . .
H42A H -0.0567 0.6391 0.4351 0.071 Uiso 1 1 calc R U . . .
H42B H -0.1355 0.6744 0.3402 0.071 Uiso 1 1 calc R U . . .
H42C H -0.0209 0.6743 0.3622 0.071 Uiso 1 1 calc R U . . .
C43 C 0.00434(18) 0.54682(13) 0.35357(18) 0.0423(6) Uani 1 1 d . . . . .
H43A H 0.0199 0.5386 0.4222 0.063 Uiso 1 1 calc R U . . .
H43B H 0.0595 0.5697 0.3492 0.063 Uiso 1 1 calc R U . . .
H43C H -0.0062 0.5062 0.3186 0.063 Uiso 1 1 calc R U . . .
 
loop_
 _atom_site_aniso_label
 _atom_site_aniso_U_11
 _atom_site_aniso_U_22
 _atom_site_aniso_U_33
 _atom_site_aniso_U_23
 _atom_site_aniso_U_13
 _atom_site_aniso_U_12
Zr1 0.02109(10) 0.01510(9) 0.02601(11) -0.00016(7) 0.00565(7) -0.00135(8)
O1 0.0287(8) 0.0200(7) 0.0370(9) -0.0060(6) 0.0103(6) -0.0047(6)
N1 0.0240(8) 0.0198(8) 0.0258(9) -0.0004(6) 0.0077(7) 0.0009(7)
C1 0.0353(12) 0.0238(11) 0.0362(13) -0.0087(9) 0.0168(10) -0.0095(9)
O2 0.0235(7) 0.0272(8) 0.0323(8) 0.0024(6) 0.0092(6) 0.0005(6)
N2 0.0234(8) 0.0178(8) 0.0287(9) -0.0003(6) 0.0073(7) 0.0008(7)
C2 0.0668(19) 0.0362(14) 0.0484(17) -0.0013(11) 0.0198(14) -0.0215(14)
O3 0.0313(8) 0.0165(7) 0.0270(8) 0.0012(5) 0.0067(6) -0.0011(6)
C3 0.0354(13) 0.0509(16) 0.0369(14) -0.0107(11) 0.0100(10) -0.0117(12)
O4 0.0230(7) 0.0271(8) 0.0298(8) -0.0052(6) 0.0085(6) -0.0052(6)
C4 0.0312(11) 0.0400(13) 0.0308(12) -0.0015(9) 0.0131(9) 0.0017(10)
C5 0.0401(14) 0.0556(18) 0.0640(19) 0.0042(14) 0.0277(13) -0.0059(13)
C6 0.0499(17) 0.0489(18) 0.071(2) 0.0001(14) 0.0218(15) 0.0189(14)
C7 0.0230(10) 0.0164(9) 0.0317(11) 0.0016(8) 0.0103(8) -0.0015(8)
C8 0.0281(10) 0.0178(10) 0.0322(11) 0.0013(8) 0.0089(8) -0.0008(8)
C9 0.0337(12) 0.0194(10) 0.0344(12) -0.0018(8) 0.0113(9) -0.0024(9)
C10 0.0287(11) 0.0170(10) 0.0406(13) 0.0027(8) 0.0147(9) -0.0017(9)
C11 0.0249(10) 0.0213(10) 0.0355(12) 0.0069(8) 0.0077(9) -0.0018(9)
C12 0.0212(9) 0.0225(10) 0.0309(11) 0.0032(8) 0.0083(8) -0.0023(8)
C13 0.0308(11) 0.0172(10) 0.0477(14) 0.0054(9) 0.0157(10) -0.0014(9)
C14 0.070(2) 0.0192(15) 0.052(2) 0.0013(12) 0.0210(17) -0.0039(15)
C15 0.099(3) 0.0312(18) 0.063(2) -0.0027(14) 0.048(2) -0.024(2)
C16 0.0389(18) 0.0251(16) 0.138(4) 0.0128(18) 0.030(2) 0.0047(13)
C14A 0.064(17) 0.011(12) 0.064(18) -0.004(12) 0.025(13) 0.006(12)
C15A 0.09(2) 0.013(13) 0.066(18) 0.015(11) 0.006(14) -0.001(15)
C16A 0.056(17) 0.031(15) 0.09(2) 0.023(13) 0.046(15) -0.008(12)
C17 0.0279(11) 0.0232(11) 0.0290(11) 0.0035(8) 0.0055(9) -0.0064(9)
C18 0.0397(13) 0.0348(13) 0.0303(12) -0.0043(9) 0.0128(10) -0.0025(10)
C19 0.0317(12) 0.0304(12) 0.0412(14) 0.0020(10) 0.0077(10) -0.0096(10)
C20 0.0418(14) 0.0340(13) 0.0330(13) 0.0048(10) 0.0036(10) -0.0112(11)
C21 0.0312(11) 0.0175(10) 0.0324(12) -0.0046(8) 0.0085(9) -0.0028(9)
C22 0.0202(9) 0.0229(10) 0.0285(11) -0.0018(8) 0.0072(8) 0.0021(8)
C23 0.0326(12) 0.0249(11) 0.0347(13) -0.0029(9) 0.0106(9) 0.0054(9)
C24 0.0383(13) 0.0359(13) 0.0315(13) -0.0102(9) 0.0105(10) 0.0046(11)
C25 0.0377(12) 0.0393(14) 0.0253(12) -0.0010(9) 0.0082(9) 0.0051(11)
C26 0.0304(11) 0.0296(12) 0.0301(12) 0.0028(8) 0.0074(9) 0.0040(9)
C27 0.0211(9) 0.0218(10) 0.0270(11) -0.0017(8) 0.0072(8) 0.0006(8)
C28 0.0311(11) 0.0210(10) 0.0333(12) 0.0053(8) 0.0080(9) -0.0020(9)
C29 0.0246(10) 0.0204(10) 0.0325(12) -0.0001(8) 0.0070(8) 0.0054(8)
C30 0.0209(9) 0.0203(10) 0.0359(12) -0.0065(8) 0.0101(8) 0.0033(8)
C31 0.0220(10) 0.0189(10) 0.0352(12) -0.0097(8) 0.0106(8) 0.0001(8)
C32 0.0269(11) 0.0218(11) 0.0408(13) -0.0106(9) 0.0158(9) -0.0025(9)
C33 0.0262(11) 0.0260(12) 0.0516(15) -0.0153(10) 0.0188(10) -0.0071(9)
C34 0.0215(10) 0.0297(12) 0.0447(14) -0.0148(10) 0.0072(9) 0.0013(9)
C35 0.0243(10) 0.0275(11) 0.0361(13) -0.0079(9) 0.0063(9) 0.0055(9)
C36 0.0224(11) 0.0460(16) 0.0576(17) -0.0203(12) 0.0062(11) -0.0040(11)
C37 0.047(9) 0.083(13) 0.046(9) -0.023(9) 0.003(7) -0.031(9)
C38 0.033(9) 0.087(15) 0.111(16) -0.051(12) -0.017(9) 0.017(10)
C39 0.075(14) 0.077(15) 0.069(12) 0.004(10) 0.005(9) -0.039(11)
C38A 0.0205(18) 0.079(5) 0.118(5) -0.053(4) 0.012(3) -0.001(2)
C39A 0.033(2) 0.058(3) 0.121(6) -0.054(3) -0.004(3) -0.009(2)
C37A 0.048(3) 0.150(8) 0.062(3) -0.001(4) -0.015(2) -0.039(4)
C40 0.0347(12) 0.0313(12) 0.0420(13) -0.0117(10) 0.0211(10) -0.0129(10)
C41 0.0475(15) 0.0527(17) 0.0570(17) -0.0075(13) 0.0290(13) -0.0207(13)
C42 0.0590(17) 0.0452(15) 0.0487(16) -0.0196(12) 0.0330(14) -0.0167(13)
C43 0.0439(14) 0.0458(15) 0.0380(14) -0.0004(11) 0.0182(11) -0.0054(12)
 
_geom_special_details
;
 All esds (except the esd in the dihedral angle between two l.s. planes)
 are estimated using the full covariance matrix.  The cell esds are taken
 into account individually in the estimation of esds in distances, angles
 and torsion angles; correlations between esds in cell parameters are only
 used when they are defined by crystal symmetry.  An approximate (isotropic)
 treatment of cell esds is used for estimating esds involving l.s. planes.
;
 
loop_
 _geom_bond_atom_site_label_1
 _geom_bond_atom_site_label_2
 _geom_bond_distance
 _geom_bond_site_symmetry_2
 _geom_bond_publ_flag
Zr1 O2 1.9462(14) . ?
Zr1 O1 1.9561(14) . ?
Zr1 O3 2.0178(13) . ?
Zr1 O4 2.0730(14) . ?
Zr1 N1 2.3907(16) . ?
Zr1 N2 2.4132(17) . ?
O1 C1 1.412(2) . ?
N1 C21 1.294(3) . ?
N1 C22 1.432(3) . ?
C1 C2 1.512(3) . ?
C1 C3 1.516(3) . ?
C1 H1 1.0000 . ?
O2 C4 1.408(2) . ?
N2 C27 1.465(3) . ?
N2 C28 1.497(3) . ?
N2 C29 1.508(2) . ?
C2 H2A 0.9800 . ?
C2 H2B 0.9800 . ?
C2 H2C 0.9800 . ?
O3 C7 1.322(2) . ?
C3 H3A 0.9800 . ?
C3 H3B 0.9800 . ?
C3 H3C 0.9800 . ?
O4 C31 1.341(2) . ?
C4 C5 1.505(3) . ?
C4 C6 1.518(3) . ?
C4 H4 1.0000 . ?
C5 H5A 0.9800 . ?
C5 H5B 0.9800 . ?
C5 H5C 0.9800 . ?
C6 H6A 0.9800 . ?
C6 H6B 0.9800 . ?
C6 H6C 0.9800 . ?
C7 C8 1.415(3) . ?
C7 C12 1.420(3) . ?
C8 C9 1.410(3) . ?
C8 C21 1.443(3) . ?
C9 C10 1.371(3) . ?
C9 H9 0.9500 . ?
C10 C11 1.411(3) . ?
C10 C13 1.533(3) . ?
C11 C12 1.387(3) . ?
C11 H11 0.9500 . ?
C12 C17 1.540(3) . ?
C13 C15A 1.36(4) . ?
C13 C14A 1.51(4) . ?
C13 C14 1.518(4) . ?
C13 C16 1.520(4) . ?
C13 C15 1.537(4) . ?
C13 C16A 1.66(4) . ?
C14 H14D 0.9800 . ?
C14 H14E 0.9800 . ?
C14 H14F 0.9800 . ?
C15 H15D 0.9800 . ?
C15 H15E 0.9800 . ?
C15 H15F 0.9800 . ?
C16 H16D 0.9800 . ?
C16 H16E 0.9800 . ?
C16 H16F 0.9800 . ?
C14A H14A 0.9800 . ?
C14A H14B 0.9800 . ?
C14A H14C 0.9800 . ?
C15A H15A 0.9800 . ?
C15A H15B 0.9800 . ?
C15A H15C 0.9800 . ?
C16A H16A 0.9800 . ?
C16A H16B 0.9800 . ?
C16A H16C 0.9800 . ?
C17 C19 1.535(3) . ?
C17 C20 1.536(3) . ?
C17 C18 1.536(3) . ?
C18 H18A 0.9800 . ?
C18 H18B 0.9800 . ?
C18 H18C 0.9800 . ?
C19 H19A 0.9800 . ?
C19 H19B 0.9800 . ?
C19 H19C 0.9800 . ?
C20 H20A 0.9800 . ?
C20 H20B 0.9800 . ?
C20 H20C 0.9800 . ?
C21 H21 0.9500 . ?
C22 C27 1.398(3) . ?
C22 C23 1.403(3) . ?
C23 C24 1.379(3) . ?
C23 H23 0.9500 . ?
C24 C25 1.383(3) . ?
C24 H24 0.9500 . ?
C25 C26 1.382(3) . ?
C25 H25 0.9500 . ?
C26 C27 1.393(3) . ?
C26 H26 0.9500 . ?
C28 H28A 0.9800 . ?
C28 H28B 0.9800 . ?
C28 H28C 0.9800 . ?
C29 C30 1.502(3) . ?
C29 H29A 0.9900 . ?
C29 H29B 0.9900 . ?
C30 C35 1.397(3) . ?
C30 C31 1.398(3) . ?
C31 C32 1.416(3) . ?
C32 C33 1.402(3) . ?
C32 C40 1.534(3) . ?
C33 C34 1.398(3) . ?
C33 H33 0.9500 . ?
C34 C35 1.390(3) . ?
C34 C36 1.546(3) . ?
C35 H35 0.9500 . ?
C36 C38 1.48(2) . ?
C36 C39A 1.513(7) . ?
C36 C39 1.53(2) . ?
C36 C37A 1.529(7) . ?
C36 C38A 1.533(6) . ?
C36 C37 1.54(2) . ?
C37 H37A 0.9800 . ?
C37 H37B 0.9800 . ?
C37 H37C 0.9800 . ?
C38 H38A 0.9800 . ?
C38 H38B 0.9800 . ?
C38 H38C 0.9800 . ?
C39 H39A 0.9800 . ?
C39 H39B 0.9800 . ?
C39 H39C 0.9800 . ?
C38A H38D 0.9800 . ?
C38A H38E 0.9800 . ?
C38A H38F 0.9800 . ?
C39A H39D 0.9800 . ?
C39A H39E 0.9800 . ?
C39A H39F 0.9800 . ?
C37A H37D 0.9800 . ?
C37A H37E 0.9800 . ?
C37A H37F 0.9800 . ?
C40 C43 1.532(3) . ?
C40 C42 1.538(3) . ?
C40 C41 1.539(3) . ?
C41 H41A 0.9800 . ?
C41 H41B 0.9800 . ?
C41 H41C 0.9800 . ?
C42 H42A 0.9800 . ?
C42 H42B 0.9800 . ?
C42 H42C 0.9800 . ?
C43 H43A 0.9800 . ?
C43 H43B 0.9800 . ?
C43 H43C 0.9800 . ?
 
loop_
 _geom_angle_atom_site_label_1
 _geom_angle_atom_site_label_2
 _geom_angle_atom_site_label_3
 _geom_angle
 _geom_angle_site_symmetry_1
 _geom_angle_site_symmetry_3
 _geom_angle_publ_flag
O2 Zr1 O1 97.34(6) . . ?
O2 Zr1 O3 96.87(6) . . ?
O1 Zr1 O3 105.11(6) . . ?
O2 Zr1 O4 163.94(6) . . ?
O1 Zr1 O4 92.16(6) . . ?
O3 Zr1 O4 93.10(6) . . ?
O2 Zr1 N1 85.24(6) . . ?
O1 Zr1 N1 175.38(6) . . ?
O3 Zr1 N1 78.30(6) . . ?
O4 Zr1 N1 84.48(5) . . ?
O2 Zr1 N2 85.13(6) . . ?
O1 Zr1 N2 105.78(6) . . ?
O3 Zr1 N2 148.51(6) . . ?
O4 Zr1 N2 79.82(6) . . ?
N1 Zr1 N2 70.54(6) . . ?
C1 O1 Zr1 151.60(13) . . ?
C21 N1 C22 118.66(17) . . ?
C21 N1 Zr1 125.00(14) . . ?
C22 N1 Zr1 116.33(12) . . ?
O1 C1 C2 110.15(19) . . ?
O1 C1 C3 109.82(18) . . ?
C2 C1 C3 112.0(2) . . ?
O1 C1 H1 108.2 . . ?
C2 C1 H1 108.2 . . ?
C3 C1 H1 108.2 . . ?
C4 O2 Zr1 165.16(14) . . ?
C27 N2 C28 110.93(16) . . ?
C27 N2 C29 108.79(15) . . ?
C28 N2 C29 107.52(15) . . ?
C27 N2 Zr1 113.45(12) . . ?
C28 N2 Zr1 104.82(12) . . ?
C29 N2 Zr1 111.15(12) . . ?
C1 C2 H2A 109.5 . . ?
C1 C2 H2B 109.5 . . ?
H2A C2 H2B 109.5 . . ?
C1 C2 H2C 109.5 . . ?
H2A C2 H2C 109.5 . . ?
H2B C2 H2C 109.5 . . ?
C7 O3 Zr1 143.82(13) . . ?
C1 C3 H3A 109.5 . . ?
C1 C3 H3B 109.5 . . ?
H3A C3 H3B 109.5 . . ?
C1 C3 H3C 109.5 . . ?
H3A C3 H3C 109.5 . . ?
H3B C3 H3C 109.5 . . ?
C31 O4 Zr1 138.59(13) . . ?
O2 C4 C5 109.88(19) . . ?
O2 C4 C6 108.7(2) . . ?
C5 C4 C6 111.5(2) . . ?
O2 C4 H4 108.9 . . ?
C5 C4 H4 108.9 . . ?
C6 C4 H4 108.9 . . ?
C4 C5 H5A 109.5 . . ?
C4 C5 H5B 109.5 . . ?
H5A C5 H5B 109.5 . . ?
C4 C5 H5C 109.5 . . ?
H5A C5 H5C 109.5 . . ?
H5B C5 H5C 109.5 . . ?
C4 C6 H6A 109.5 . . ?
C4 C6 H6B 109.5 . . ?
H6A C6 H6B 109.5 . . ?
C4 C6 H6C 109.5 . . ?
H6A C6 H6C 109.5 . . ?
H6B C6 H6C 109.5 . . ?
O3 C7 C8 120.08(18) . . ?
O3 C7 C12 120.78(18) . . ?
C8 C7 C12 119.14(18) . . ?
C9 C8 C7 119.94(19) . . ?
C9 C8 C21 116.25(19) . . ?
C7 C8 C21 123.77(18) . . ?
C10 C9 C8 122.2(2) . . ?
C10 C9 H9 118.9 . . ?
C8 C9 H9 118.9 . . ?
C9 C10 C11 116.57(19) . . ?
C9 C10 C13 123.3(2) . . ?
C11 C10 C13 120.07(19) . . ?
C12 C11 C10 124.4(2) . . ?
C12 C11 H11 117.8 . . ?
C10 C11 H11 117.8 . . ?
C11 C12 C7 117.71(19) . . ?
C11 C12 C17 122.15(19) . . ?
C7 C12 C17 120.14(18) . . ?
C15A C13 C14A 114(3) . . ?
C14 C13 C16 108.9(3) . . ?
C15A C13 C10 116.8(16) . . ?
C14A C13 C10 105.3(13) . . ?
C14 C13 C10 112.9(2) . . ?
C16 C13 C10 109.21(19) . . ?
C14 C13 C15 107.1(2) . . ?
C16 C13 C15 108.9(3) . . ?
C10 C13 C15 109.8(2) . . ?
C15A C13 C16A 112(2) . . ?
C14A C13 C16A 97(2) . . ?
C10 C13 C16A 108.8(10) . . ?
C13 C14 H14D 109.5 . . ?
C13 C14 H14E 109.5 . . ?
H14D C14 H14E 109.5 . . ?
C13 C14 H14F 109.5 . . ?
H14D C14 H14F 109.5 . . ?
H14E C14 H14F 109.5 . . ?
C13 C15 H15D 109.5 . . ?
C13 C15 H15E 109.5 . . ?
H15D C15 H15E 109.5 . . ?
C13 C15 H15F 109.5 . . ?
H15D C15 H15F 109.5 . . ?
H15E C15 H15F 109.5 . . ?
C13 C16 H16D 109.5 . . ?
C13 C16 H16E 109.5 . . ?
H16D C16 H16E 109.5 . . ?
C13 C16 H16F 109.5 . . ?
H16D C16 H16F 109.5 . . ?
H16E C16 H16F 109.5 . . ?
C13 C14A H14A 109.5 . . ?
C13 C14A H14B 109.5 . . ?
H14A C14A H14B 109.5 . . ?
C13 C14A H14C 109.5 . . ?
H14A C14A H14C 109.5 . . ?
H14B C14A H14C 109.5 . . ?
C13 C15A H15A 109.5 . . ?
C13 C15A H15B 109.5 . . ?
H15A C15A H15B 109.5 . . ?
C13 C15A H15C 109.5 . . ?
H15A C15A H15C 109.5 . . ?
H15B C15A H15C 109.5 . . ?
C13 C16A H16A 109.5 . . ?
C13 C16A H16B 109.5 . . ?
H16A C16A H16B 109.5 . . ?
C13 C16A H16C 109.5 . . ?
H16A C16A H16C 109.5 . . ?
H16B C16A H16C 109.5 . . ?
C19 C17 C20 107.33(18) . . ?
C19 C17 C18 110.44(18) . . ?
C20 C17 C18 107.37(19) . . ?
C19 C17 C12 109.09(18) . . ?
C20 C17 C12 111.94(18) . . ?
C18 C17 C12 110.62(17) . . ?
C17 C18 H18A 109.5 . . ?
C17 C18 H18B 109.5 . . ?
H18A C18 H18B 109.5 . . ?
C17 C18 H18C 109.5 . . ?
H18A C18 H18C 109.5 . . ?
H18B C18 H18C 109.5 . . ?
C17 C19 H19A 109.5 . . ?
C17 C19 H19B 109.5 . . ?
H19A C19 H19B 109.5 . . ?
C17 C19 H19C 109.5 . . ?
H19A C19 H19C 109.5 . . ?
H19B C19 H19C 109.5 . . ?
C17 C20 H20A 109.5 . . ?
C17 C20 H20B 109.5 . . ?
H20A C20 H20B 109.5 . . ?
C17 C20 H20C 109.5 . . ?
H20A C20 H20C 109.5 . . ?
H20B C20 H20C 109.5 . . ?
N1 C21 C8 128.37(19) . . ?
N1 C21 H21 115.8 . . ?
C8 C21 H21 115.8 . . ?
C27 C22 C23 118.24(19) . . ?
C27 C22 N1 117.69(17) . . ?
C23 C22 N1 124.00(18) . . ?
C24 C23 C22 120.6(2) . . ?
C24 C23 H23 119.7 . . ?
C22 C23 H23 119.7 . . ?
C23 C24 C25 120.8(2) . . ?
C23 C24 H24 119.6 . . ?
C25 C24 H24 119.6 . . ?
C26 C25 C24 119.4(2) . . ?
C26 C25 H25 120.3 . . ?
C24 C25 H25 120.3 . . ?
C25 C26 C27 120.4(2) . . ?
C25 C26 H26 119.8 . . ?
C27 C26 H26 119.8 . . ?
C26 C27 C22 120.51(19) . . ?
C26 C27 N2 120.50(18) . . ?
C22 C27 N2 118.98(18) . . ?
N2 C28 H28A 109.5 . . ?
N2 C28 H28B 109.5 . . ?
H28A C28 H28B 109.5 . . ?
N2 C28 H28C 109.5 . . ?
H28A C28 H28C 109.5 . . ?
H28B C28 H28C 109.5 . . ?
C30 C29 N2 115.79(16) . . ?
C30 C29 H29A 108.3 . . ?
N2 C29 H29A 108.3 . . ?
C30 C29 H29B 108.3 . . ?
N2 C29 H29B 108.3 . . ?
H29A C29 H29B 107.4 . . ?
C35 C30 C31 120.8(2) . . ?
C35 C30 C29 120.7(2) . . ?
C31 C30 C29 117.90(18) . . ?
O4 C31 C30 117.54(18) . . ?
O4 C31 C32 122.40(19) . . ?
C30 C31 C32 119.98(19) . . ?
C33 C32 C31 116.7(2) . . ?
C33 C32 C40 121.82(19) . . ?
C31 C32 C40 121.31(18) . . ?
C34 C33 C32 124.2(2) . . ?
C34 C33 H33 117.9 . . ?
C32 C33 H33 117.9 . . ?
C35 C34 C33 117.16(19) . . ?
C35 C34 C36 122.7(2) . . ?
C33 C34 C36 120.1(2) . . ?
C34 C35 C30 120.9(2) . . ?
C34 C35 H35 119.5 . . ?
C30 C35 H35 119.5 . . ?
C38 C36 C39 112.9(15) . . ?
C39A C36 C37A 110.2(4) . . ?
C39A C36 C38A 107.5(4) . . ?
C37A C36 C38A 108.5(4) . . ?
C38 C36 C37 108.6(13) . . ?
C39 C36 C37 102.3(12) . . ?
C38 C36 C34 109.2(9) . . ?
C39A C36 C34 110.4(3) . . ?
C39 C36 C34 113.0(10) . . ?
C37A C36 C34 111.5(3) . . ?
C38A C36 C34 108.5(3) . . ?
C37 C36 C34 110.7(7) . . ?
C36 C37 H37A 109.5 . . ?
C36 C37 H37B 109.5 . . ?
H37A C37 H37B 109.5 . . ?
C36 C37 H37C 109.5 . . ?
H37A C37 H37C 109.5 . . ?
H37B C37 H37C 109.5 . . ?
C36 C38 H38A 109.5 . . ?
C36 C38 H38B 109.5 . . ?
H38A C38 H38B 109.5 . . ?
C36 C38 H38C 109.5 . . ?
H38A C38 H38C 109.5 . . ?
H38B C38 H38C 109.5 . . ?
C36 C39 H39A 109.5 . . ?
C36 C39 H39B 109.5 . . ?
H39A C39 H39B 109.5 . . ?
C36 C39 H39C 109.5 . . ?
H39A C39 H39C 109.5 . . ?
H39B C39 H39C 109.5 . . ?
C36 C38A H38D 109.5 . . ?
C36 C38A H38E 109.5 . . ?
H38D C38A H38E 109.5 . . ?
C36 C38A H38F 109.5 . . ?
H38D C38A H38F 109.5 . . ?
H38E C38A H38F 109.5 . . ?
C36 C39A H39D 109.5 . . ?
C36 C39A H39E 109.5 . . ?
H39D C39A H39E 109.5 . . ?
C36 C39A H39F 109.5 . . ?
H39D C39A H39F 109.5 . . ?
H39E C39A H39F 109.5 . . ?
C36 C37A H37D 109.5 . . ?
C36 C37A H37E 109.5 . . ?
H37D C37A H37E 109.5 . . ?
C36 C37A H37F 109.5 . . ?
H37D C37A H37F 109.5 . . ?
H37E C37A H37F 109.5 . . ?
C43 C40 C32 112.18(18) . . ?
C43 C40 C42 109.0(2) . . ?
C32 C40 C42 108.1(2) . . ?
C43 C40 C41 107.7(2) . . ?
C32 C40 C41 112.62(19) . . ?
C42 C40 C41 107.03(19) . . ?
C40 C41 H41A 109.5 . . ?
C40 C41 H41B 109.5 . . ?
H41A C41 H41B 109.5 . . ?
C40 C41 H41C 109.5 . . ?
H41A C41 H41C 109.5 . . ?
H41B C41 H41C 109.5 . . ?
C40 C42 H42A 109.5 . . ?
C40 C42 H42B 109.5 . . ?
H42A C42 H42B 109.5 . . ?
C40 C42 H42C 109.5 . . ?
H42A C42 H42C 109.5 . . ?
H42B C42 H42C 109.5 . . ?
C40 C43 H43A 109.5 . . ?
C40 C43 H43B 109.5 . . ?
H43A C43 H43B 109.5 . . ?
C40 C43 H43C 109.5 . . ?
H43A C43 H43C 109.5 . . ?
H43B C43 H43C 109.5 . . ?
 
loop_
 _geom_torsion_atom_site_label_1
 _geom_torsion_atom_site_label_2
 _geom_torsion_atom_site_label_3
 _geom_torsion_atom_site_label_4
 _geom_torsion
 _geom_torsion_site_symmetry_1
 _geom_torsion_site_symmetry_2
 _geom_torsion_site_symmetry_3
 _geom_torsion_site_symmetry_4
 _geom_torsion_publ_flag
Zr1 O1 C1 C2 88.1(3) . . . . ?
Zr1 O1 C1 C3 -35.8(4) . . . . ?
Zr1 O2 C4 C5 -170.1(4) . . . . ?
Zr1 O2 C4 C6 -47.9(6) . . . . ?
Zr1 O3 C7 C8 1.9(3) . . . . ?
Zr1 O3 C7 C12 -177.47(15) . . . . ?
O3 C7 C8 C9 -178.33(18) . . . . ?
C12 C7 C8 C9 1.1(3) . . . . ?
O3 C7 C8 C21 4.0(3) . . . . ?
C12 C7 C8 C21 -176.59(19) . . . . ?
C7 C8 C9 C10 -0.9(3) . . . . ?
C21 C8 C9 C10 176.9(2) . . . . ?
C8 C9 C10 C11 -0.2(3) . . . . ?
C8 C9 C10 C13 -179.42(19) . . . . ?
C9 C10 C11 C12 1.1(3) . . . . ?
C13 C10 C11 C12 -179.63(19) . . . . ?
C10 C11 C12 C7 -0.9(3) . . . . ?
C10 C11 C12 C17 179.10(19) . . . . ?
O3 C7 C12 C11 179.18(18) . . . . ?
C8 C7 C12 C11 -0.2(3) . . . . ?
O3 C7 C12 C17 -0.8(3) . . . . ?
C8 C7 C12 C17 179.78(18) . . . . ?
C9 C10 C13 C15A -172(3) . . . . ?
C11 C10 C13 C15A 8(3) . . . . ?
C9 C10 C13 C14A -44.5(19) . . . . ?
C11 C10 C13 C14A 136.2(18) . . . . ?
C9 C10 C13 C14 -13.0(3) . . . . ?
C11 C10 C13 C14 167.7(2) . . . . ?
C9 C10 C13 C16 108.3(3) . . . . ?
C11 C10 C13 C16 -71.0(3) . . . . ?
C9 C10 C13 C15 -132.5(3) . . . . ?
C11 C10 C13 C15 48.3(3) . . . . ?
C9 C10 C13 C16A 59.1(18) . . . . ?
C11 C10 C13 C16A -120.1(18) . . . . ?
C11 C12 C17 C19 116.8(2) . . . . ?
C7 C12 C17 C19 -63.2(2) . . . . ?
C11 C12 C17 C20 -1.8(3) . . . . ?
C7 C12 C17 C20 178.19(19) . . . . ?
C11 C12 C17 C18 -121.5(2) . . . . ?
C7 C12 C17 C18 58.5(2) . . . . ?
C22 N1 C21 C8 171.6(2) . . . . ?
Zr1 N1 C21 C8 -7.4(3) . . . . ?
C9 C8 C21 N1 -177.9(2) . . . . ?
C7 C8 C21 N1 -0.1(4) . . . . ?
C21 N1 C22 C27 169.89(19) . . . . ?
Zr1 N1 C22 C27 -11.0(2) . . . . ?
C21 N1 C22 C23 -13.2(3) . . . . ?
Zr1 N1 C22 C23 165.95(16) . . . . ?
C27 C22 C23 C24 -0.8(3) . . . . ?
N1 C22 C23 C24 -177.66(19) . . . . ?
C22 C23 C24 C25 0.1(3) . . . . ?
C23 C24 C25 C26 0.2(4) . . . . ?
C24 C25 C26 C27 0.3(3) . . . . ?
C25 C26 C27 C22 -1.0(3) . . . . ?
C25 C26 C27 N2 -179.50(19) . . . . ?
C23 C22 C27 C26 1.2(3) . . . . ?
N1 C22 C27 C26 178.30(18) . . . . ?
C23 C22 C27 N2 179.76(18) . . . . ?
N1 C22 C27 N2 -3.1(3) . . . . ?
C28 N2 C27 C26 -48.5(2) . . . . ?
C29 N2 C27 C26 69.5(2) . . . . ?
Zr1 N2 C27 C26 -166.21(15) . . . . ?
C28 N2 C27 C22 132.90(19) . . . . ?
C29 N2 C27 C22 -109.03(19) . . . . ?
Zr1 N2 C27 C22 15.2(2) . . . . ?
C27 N2 C29 C30 61.9(2) . . . . ?
C28 N2 C29 C30 -177.85(17) . . . . ?
Zr1 N2 C29 C30 -63.66(19) . . . . ?
N2 C29 C30 C35 -124.1(2) . . . . ?
N2 C29 C30 C31 64.8(2) . . . . ?
Zr1 O4 C31 C30 -40.7(3) . . . . ?
Zr1 O4 C31 C32 142.38(17) . . . . ?
C35 C30 C31 O4 177.60(18) . . . . ?
C29 C30 C31 O4 -11.3(3) . . . . ?
C35 C30 C31 C32 -5.4(3) . . . . ?
C29 C30 C31 C32 165.74(18) . . . . ?
O4 C31 C32 C33 -178.76(18) . . . . ?
C30 C31 C32 C33 4.4(3) . . . . ?
O4 C31 C32 C40 5.7(3) . . . . ?
C30 C31 C32 C40 -171.16(18) . . . . ?
C31 C32 C33 C34 -0.8(3) . . . . ?
C40 C32 C33 C34 174.7(2) . . . . ?
C32 C33 C34 C35 -1.8(3) . . . . ?
C32 C33 C34 C36 -178.8(2) . . . . ?
C33 C34 C35 C30 0.9(3) . . . . ?
C36 C34 C35 C30 177.82(19) . . . . ?
C31 C30 C35 C34 2.7(3) . . . . ?
C29 C30 C35 C34 -168.20(19) . . . . ?
C35 C34 C36 C38 -79.4(19) . . . . ?
C33 C34 C36 C38 97.5(19) . . . . ?
C35 C34 C36 C39A 124.3(4) . . . . ?
C33 C34 C36 C39A -58.8(5) . . . . ?
C35 C34 C36 C39 154.1(15) . . . . ?
C33 C34 C36 C39 -29.0(16) . . . . ?
C35 C34 C36 C37A 1.4(6) . . . . ?
C33 C34 C36 C37A 178.2(6) . . . . ?
C35 C34 C36 C38A -118.1(5) . . . . ?
C33 C34 C36 C38A 58.8(5) . . . . ?
C35 C34 C36 C37 40.1(13) . . . . ?
C33 C34 C36 C37 -143.1(13) . . . . ?
C33 C32 C40 C43 123.1(2) . . . . ?
C31 C32 C40 C43 -61.6(3) . . . . ?
C33 C32 C40 C42 -116.7(2) . . . . ?
C31 C32 C40 C42 58.6(3) . . . . ?
C33 C32 C40 C41 1.3(3) . . . . ?
C31 C32 C40 C41 176.6(2) . . . . ?
 
_refine_diff_density_max    0.552
_refine_diff_density_min   -0.404
_refine_diff_density_rms    0.063

_shelx_res_file
;

    e15mdj21.res created by SHELXL-2014/7


TITL
CELL 0.71073 14.9527 20.9673 15.1609 90.000 115.285 90.000
ZERR 4.0000 0.0004 0.0004 0.0005 0.000 0.003 0.000
LATT 1
SYMM -X, 0.5+Y, 0.5-Z
SFAC C H N O ZR
UNIT 172 256 8 16 4
ACTA
LIST 4
FMAP 2
PLAN 10
TEMP -123
SIZE 0.2 0.1 0.1
OMIT  -1 1 4
BOND   $H
CONF
ISOR C14 C15 C16 C14A C15A C16A 0.01
ISOR C37 C38 C39 C37A C38A C39A 0.01
OMIT 1 0 2
L.S. 10
ACTA
WGHT    0.034400    2.099400
FVAR       2.19706   0.91858   0.20929
ZR1   5    0.182057    0.670496    0.252504    11.00000    0.02109    0.01510 =
         0.02601   -0.00016    0.00565   -0.00135
O1    4    0.201638    0.750429    0.324956    11.00000    0.02873    0.02000 =
         0.03700   -0.00601    0.01031   -0.00467
N1    3    0.145023    0.575783    0.155558    11.00000    0.02403    0.01979 =
         0.02582   -0.00035    0.00768    0.00087
C1    1    0.262475    0.800430    0.381422    11.00000    0.03533    0.02384 =
         0.03620   -0.00869    0.01685   -0.00946
AFIX  13
H1    2    0.231626    0.818604    0.422851    11.00000   -1.20000
AFIX   0
O2    4    0.295139    0.678194    0.221424    11.00000    0.02349    0.02719 =
         0.03226    0.00240    0.00915    0.00051
N2    3    0.084795    0.697651    0.083463    11.00000    0.02340    0.01782 =
         0.02872   -0.00030    0.00730    0.00081
C2    1    0.268809    0.852760    0.315662    11.00000    0.06682    0.03622 =
         0.04838   -0.00133    0.01983   -0.02146
AFIX 137
H2A   2    0.300352    0.836108    0.275502    11.00000   -1.50000
H2B   2    0.308086    0.888227    0.355564    11.00000   -1.50000
H2C   2    0.202094    0.867853    0.273311    11.00000   -1.50000
AFIX   0
O3    4    0.239440    0.602305    0.355426    11.00000    0.03132    0.01648 =
         0.02699    0.00121    0.00667   -0.00112
C3    1    0.363574    0.774505    0.448193    11.00000    0.03540    0.05087 =
         0.03687   -0.01073    0.01004   -0.01166
AFIX 137
H3A   2    0.356326    0.741177    0.489996    11.00000   -1.50000
H3B   2    0.404671    0.809094    0.488890    11.00000   -1.50000
H3C   2    0.395081    0.756484    0.408856    11.00000   -1.50000
AFIX   0
O4    4    0.040759    0.659238    0.243726    11.00000    0.02299    0.02706 =
         0.02979   -0.00520    0.00846   -0.00522
C4    1    0.372587    0.666795    0.194006    11.00000    0.03115    0.03999 =
         0.03082   -0.00148    0.01314    0.00174
AFIX  13
H4    2    0.343751    0.658380    0.122245    11.00000   -1.20000
AFIX   0
C5    1    0.438657    0.724423    0.216489    11.00000    0.04007    0.05559 =
         0.06404    0.00420    0.02766   -0.00594
AFIX 137
H5A   2    0.399527    0.761619    0.182274    11.00000   -1.50000
H5B   2    0.490869    0.716820    0.194896    11.00000   -1.50000
H5C   2    0.468603    0.732358    0.286937    11.00000   -1.50000
AFIX   0
C6    1    0.429323    0.608185    0.247844    11.00000    0.04991    0.04888 =
         0.07129    0.00012    0.02180    0.01886
AFIX 137
H6A   2    0.460213    0.616670    0.318143    11.00000   -1.50000
H6B   2    0.480633    0.597993    0.226031    11.00000   -1.50000
H6C   2    0.383749    0.572055    0.234112    11.00000   -1.50000
AFIX   0
C7    1    0.247309    0.539969    0.369914    11.00000    0.02305    0.01639 =
         0.03174    0.00161    0.01029   -0.00153
C8    1    0.205105    0.497719    0.289893    11.00000    0.02806    0.01780 =
         0.03224    0.00125    0.00889   -0.00081
C9    1    0.211354    0.431279    0.305827    11.00000    0.03370    0.01943 =
         0.03444   -0.00179    0.01130   -0.00242
AFIX  43
H9    2    0.181805    0.403556    0.251402    11.00000   -1.20000
AFIX   0
C10   1    0.258664    0.405367    0.397263    11.00000    0.02872    0.01699 =
         0.04064    0.00273    0.01474   -0.00173
C11   1    0.301451    0.448667    0.475426    11.00000    0.02488    0.02130 =
         0.03552    0.00693    0.00769   -0.00184
AFIX  43
H11   2    0.335560    0.431575    0.539217    11.00000   -1.20000
AFIX   0
C12   1    0.297101    0.514509    0.465464    11.00000    0.02118    0.02252 =
         0.03092    0.00319    0.00829   -0.00228
C13   1    0.267469    0.333395    0.416732    11.00000    0.03084    0.01716 =
         0.04770    0.00545    0.01572   -0.00136
PART 1
C14   1    0.199655    0.294614    0.329028    21.00000    0.07048    0.01925 =
         0.05249    0.00132    0.02097   -0.00387
AFIX 137
H14D  2    0.130962    0.307825    0.309673    21.00000   -1.50000
H14E  2    0.206624    0.249220    0.346053    21.00000   -1.50000
H14F  2    0.217611    0.301766    0.274753    21.00000   -1.50000
AFIX   0
C15   1    0.239379    0.317777    0.500724    21.00000    0.09925    0.03122 =
         0.06335   -0.00274    0.04792   -0.02366
AFIX 137
H15D  2    0.171803    0.332450    0.483872    21.00000   -1.50000
H15E  2    0.285243    0.339336    0.560251    21.00000   -1.50000
H15F  2    0.243180    0.271587    0.511607    21.00000   -1.50000
AFIX   0
C16   1    0.373713    0.312761    0.445547    21.00000    0.03886    0.02507 =
         0.13821    0.01283    0.03027    0.00471
AFIX 137
H16D  2    0.380173    0.267024    0.460269    21.00000   -1.50000
H16E  2    0.417832    0.336654    0.503355    21.00000   -1.50000
H16F  2    0.391655    0.321298    0.391599    21.00000   -1.50000
AFIX   0
PART 2
C14A  1    0.166242    0.306775    0.354997   -21.00000    0.06397    0.01131 =
         0.06356   -0.00429    0.02541    0.00562
AFIX 137
H14A  2    0.146011    0.319104    0.286791   -21.00000   -1.50000
H14B  2    0.118764    0.323740    0.377834   -21.00000   -1.50000
H14C  2    0.168087    0.260160    0.360195   -21.00000   -1.50000
AFIX   0
C15A  1    0.305954    0.314763    0.511370   -21.00000    0.08642    0.01342 =
         0.06590    0.01547    0.00645   -0.00101
AFIX 137
H15A  2    0.271896    0.337080    0.545016   -21.00000   -1.50000
H15B  2    0.376622    0.325091    0.542816   -21.00000   -1.50000
H15C  2    0.297170    0.268648    0.514706   -21.00000   -1.50000
AFIX   0
C16A  1    0.325753    0.300727    0.356342   -21.00000    0.05601    0.03116 =
         0.09256    0.02323    0.04589   -0.00751
AFIX 137
H16A  2    0.374380    0.269772    0.398393   -21.00000   -1.50000
H16B  2    0.359612    0.334062    0.336823   -21.00000   -1.50000
H16C  2    0.277719    0.279037    0.298112   -21.00000   -1.50000
AFIX   0
PART 0
C17   1    0.344007    0.559511    0.553773    11.00000    0.02790    0.02320 =
         0.02901    0.00348    0.00554   -0.00636
C18   1    0.265565    0.604182    0.560216    11.00000    0.03974    0.03475 =
         0.03033   -0.00426    0.01282   -0.00251
AFIX 137
H18A  2    0.214039    0.578780    0.567368    11.00000   -1.50000
H18B  2    0.235932    0.629868    0.500637    11.00000   -1.50000
H18C  2    0.296689    0.632392    0.616754    11.00000   -1.50000
AFIX   0
C19   1    0.426431    0.598289    0.544030    11.00000    0.03173    0.03040 =
         0.04120    0.00204    0.00774   -0.00962
AFIX 137
H19A  2    0.398769    0.622478    0.482873    11.00000   -1.50000
H19B  2    0.477761    0.569288    0.543875    11.00000   -1.50000
H19C  2    0.455371    0.627852    0.599124    11.00000   -1.50000
AFIX   0
C20   1    0.391186    0.522622    0.650376    11.00000    0.04184    0.03396 =
         0.03302    0.00476    0.00359   -0.01119
AFIX 137
H20A  2    0.417391    0.552843    0.704835    11.00000   -1.50000
H20B  2    0.445121    0.495950    0.650641    11.00000   -1.50000
H20C  2    0.341154    0.495532    0.657299    11.00000   -1.50000
AFIX   0
C21   1    0.157566    0.518250    0.189555    11.00000    0.03122    0.01752 =
         0.03238   -0.00458    0.00848   -0.00284
AFIX  43
H21   2    0.132198    0.485263    0.142352    11.00000   -1.20000
AFIX   0
C22   1    0.107500    0.584683    0.052321    11.00000    0.02022    0.02286 =
         0.02850   -0.00181    0.00721    0.00211
C23   1    0.101567    0.536046   -0.013503    11.00000    0.03264    0.02493 =
         0.03466   -0.00293    0.01058    0.00543
AFIX  43
H23   2    0.121003    0.493898    0.009789    11.00000   -1.20000
AFIX   0
C24   1    0.067783    0.548861   -0.111700    11.00000    0.03827    0.03591 =
         0.03153   -0.01022    0.01046    0.00457
AFIX  43
H24   2    0.064135    0.515391   -0.155346    11.00000   -1.20000
AFIX   0
C25   1    0.039134    0.609833   -0.147463    11.00000    0.03768    0.03932 =
         0.02532   -0.00097    0.00817    0.00514
AFIX  43
H25   2    0.015758    0.618230   -0.215250    11.00000   -1.20000
AFIX   0
C26   1    0.044829    0.658440   -0.083663    11.00000    0.03037    0.02960 =
         0.03014    0.00284    0.00743    0.00403
AFIX  43
H26   2    0.025004    0.700379   -0.107813    11.00000   -1.20000
AFIX   0
C27   1    0.079454    0.646302    0.015808    11.00000    0.02111    0.02177 =
         0.02701   -0.00175    0.00724    0.00061
C28   1    0.134211    0.755406    0.066474    11.00000    0.03110    0.02097 =
         0.03328    0.00530    0.00796   -0.00199
AFIX 137
H28A  2    0.198502    0.743328    0.068815    11.00000   -1.50000
H28B  2    0.143885    0.787180    0.117164    11.00000   -1.50000
H28C  2    0.092593    0.773517    0.002321    11.00000   -1.50000
AFIX   0
C29   1   -0.018871    0.716551    0.065472    11.00000    0.02459    0.02043 =
         0.03246   -0.00008    0.00697    0.00538
AFIX  23
H29A  2   -0.014801    0.753188    0.108218    11.00000   -1.20000
H29B  2   -0.053860    0.731331   -0.002864    11.00000   -1.20000
AFIX   0
C30   1   -0.080027    0.665331    0.082412    11.00000    0.02091    0.02029 =
         0.03590   -0.00654    0.01010    0.00328
C31   1   -0.049492    0.642343    0.177437    11.00000    0.02196    0.01888 =
         0.03520   -0.00965    0.01059    0.00006
C32   1   -0.114882    0.605271    0.201748    11.00000    0.02692    0.02180 =
         0.04083   -0.01063    0.01576   -0.00251
C33   1   -0.206340    0.589809    0.125217    11.00000    0.02616    0.02600 =
         0.05157   -0.01528    0.01881   -0.00711
AFIX  43
H33   2   -0.250813    0.564460    0.140017    11.00000   -1.20000
AFIX   0
C34   1   -0.236311    0.609273    0.028578    11.00000    0.02155    0.02974 =
         0.04471   -0.01481    0.00720    0.00133
C35   1   -0.171562    0.647812    0.008650    11.00000    0.02426    0.02755 =
         0.03612   -0.00794    0.00630    0.00553
AFIX  43
H35   2   -0.189815    0.662451   -0.056062    11.00000   -1.20000
AFIX   0
C36   1   -0.339733    0.590657   -0.050007    11.00000    0.02238    0.04604 =
         0.05756   -0.02035    0.00620   -0.00403
PART 1
C37   1   -0.335514    0.576071   -0.147758    31.00000    0.04709    0.08306 =
         0.04615   -0.02267    0.00274   -0.03081
AFIX 137
H37A  2   -0.290569    0.540185   -0.139250    31.00000   -1.50000
H37B  2   -0.311450    0.613715   -0.169361    31.00000   -1.50000
H37C  2   -0.401839    0.565035   -0.196840    31.00000   -1.50000
AFIX   0
C38   1   -0.408966    0.644518   -0.064802    31.00000    0.03313    0.08697 =
         0.11091   -0.05054   -0.01662    0.01688
AFIX 137
H38A  2   -0.469617    0.637297   -0.124310    31.00000   -1.50000
H38B  2   -0.377827    0.684325   -0.071088    31.00000   -1.50000
H38C  2   -0.425207    0.647527   -0.008784    31.00000   -1.50000
AFIX   0
C39   1   -0.377576    0.527850   -0.027659    31.00000    0.07517    0.07696 =
         0.06886    0.00356    0.00524   -0.03855
AFIX 137
H39A  2   -0.433717    0.512663   -0.086389    31.00000   -1.50000
H39B  2   -0.398770    0.534569    0.024525    31.00000   -1.50000
H39C  2   -0.324522    0.496021   -0.006774    31.00000   -1.50000
AFIX   0
PART 2
C38A  1   -0.417997    0.617038   -0.019568   -31.00000    0.02055    0.07937 =
         0.11825   -0.05294    0.01176   -0.00123
AFIX 137
H38D  2   -0.484101    0.606400   -0.069479   -31.00000   -1.50000
H38E  2   -0.411190    0.663477   -0.012615   -31.00000   -1.50000
H38F  2   -0.408735    0.598101    0.042851   -31.00000   -1.50000
AFIX   0
C39A  1   -0.351062    0.518868   -0.056560   -31.00000    0.03349    0.05804 =
         0.12133   -0.05406   -0.00441   -0.00855
AFIX 137
H39D  2   -0.338667    0.501626    0.007717   -31.00000   -1.50000
H39E  2   -0.303469    0.500623   -0.078228   -31.00000   -1.50000
H39F  2   -0.418388    0.507863   -0.103413   -31.00000   -1.50000
AFIX   0
C37A  1   -0.358593    0.618457   -0.149662   -31.00000    0.04811    0.14992 =
         0.06230   -0.00138   -0.01503   -0.03855
AFIX 137
H37D  2   -0.308205    0.602724   -0.169493   -31.00000   -1.50000
H37E  2   -0.355417    0.665106   -0.145492   -31.00000   -1.50000
H37F  2   -0.424245    0.605358   -0.197871   -31.00000   -1.50000
AFIX   0
PART 0
C40   1   -0.089668    0.587366    0.307834    11.00000    0.03466    0.03127 =
         0.04205   -0.01166    0.02109   -0.01286
C41   1   -0.173571    0.550393    0.318217    11.00000    0.04751    0.05265 =
         0.05700   -0.00749    0.02897   -0.02075
AFIX 137
H41A  2   -0.185416    0.510289    0.281754    11.00000   -1.50000
H41B  2   -0.234022    0.576180    0.292250    11.00000   -1.50000
H41C  2   -0.154703    0.541167    0.387259    11.00000   -1.50000
AFIX   0
C42   1   -0.074320    0.649409    0.366680    11.00000    0.05903    0.04522 =
         0.04869   -0.01958    0.03302   -0.01669
AFIX 137
H42A  2   -0.056727    0.639071    0.435146    11.00000   -1.50000
H42B  2   -0.135541    0.674428    0.340210    11.00000   -1.50000
H42C  2   -0.020915    0.674257    0.362174    11.00000   -1.50000
AFIX   0
C43   1    0.004345    0.546822    0.353569    11.00000    0.04391    0.04579 =
         0.03803   -0.00041    0.01822   -0.00537
AFIX 137
H43A  2    0.019876    0.538631    0.422225    11.00000   -1.50000
H43B  2    0.059454    0.569696    0.349171    11.00000   -1.50000
H43C  2   -0.006155    0.506204    0.318565    11.00000   -1.50000
AFIX   0
HKLF 4

REM
REM R1 =  0.0422 for    8344 Fo > 4sig(Fo)  and  0.0695 for all   11290 data
REM    530 parameters refined using     72 restraints

END

WGHT      0.0345      2.0998

REM Highest difference peak  0.552,  deepest hole -0.404,  1-sigma level  0.063
Q1    1   0.1118  0.6695  0.2306  11.00000  0.05    0.55
Q2    1   0.2500  0.6722  0.2756  11.00000  0.05    0.49
Q3    1  -0.1763  0.4882  0.2488  11.00000  0.05    0.47
Q4    1   0.2184  0.6699  0.2072  11.00000  0.05    0.43
Q5    1   0.2584  0.3701  0.4007  11.00000  0.05    0.32
Q6    1   0.3717  0.5776  0.5328  11.00000  0.05    0.32
Q7    1   0.4584  0.6768  0.2418  11.00000  0.05    0.32
Q8    1   0.2874  0.8108  0.3422  11.00000  0.05    0.32
Q9    1   0.0861  0.5597  0.0169  11.00000  0.05    0.31
Q10   1   0.1847  0.5118  0.2483  11.00000  0.05    0.31
;
_shelx_res_checksum   49632

_shelx_hkl_file
;
   0   0  -3 198.123 104.510   1
   0   0   3 498.692 156.311   1
   0   0  -4 56766.5 1039.57   1
   0   0   4 55268.1 1060.62   1
   0   0  -4 53501.2 896.911   5
   0   0  -5 47.1829 93.4738   1
   0   0   5-27.2565 109.259   1
   0   0  -5-3.79903 62.6994   5
   0   0   5-66.2035 96.5978   3
   0   0   6 4043.82 299.085   1
   0   0  -6 4353.70 219.438   5
   0   0   6 4362.70 275.135   3
   0   0   7-113.593 155.262   1
   0   0  -7-70.4172 78.8328   5
   0   0  -8 6961.06 298.889   5
   0   0   8 6819.44 442.522   1
   0   0  -9 59.6879 71.3232   5
   0   0   9 42.9363 151.321   1
   0   0  10 37049.0 1190.72   1
   0   0 -10 36570.9 826.412   5
   0   0  11-236.754 205.512   1
   0   0 -11-144.753 89.2333   5
   0   0  12 12310.0 747.753   1
   0   0  13 185.154 242.739   1
   0   0  14 4326.83 504.564   1
   0   0  15-279.816 285.837   1
   0   0  16 8011.60 711.866   1
   0   0  17 224.477 236.553   1
   0  -1  -3 6890.38 264.559   3
   0   1   3 6533.70 272.940   1
   0  -1  -3 7171.31 272.742   1
   0  -1   3 6845.01 272.716   1
   0   1   3 6968.96 260.165   3
   0  -1  -3 7226.91 199.536   5
   0   1  -3 6971.64 266.522   1
   0   1   3 6920.49 201.979   5
   0   1   4 25559.3 604.672   3
   0   1   4 25193.4 645.291   1
   0   1  -4 25984.1 626.450   1
   0  -1  -4 25439.5 500.977   5
   0  -1  -4 25806.5 628.343   1
   0  -1   4 25053.2 636.612   1
   0  -1   5 1424.16 188.137   1
   0   1   5 1331.01 187.533   1
   0   1  -5 1268.55 155.353   1
   0   1   5 1553.95 167.877   3
   0  -1  -5 1336.52 116.403   5
   0  -1  -5 1246.30 163.012   1
   0  -1  -6 39900.7 761.288   5
   0   1  -6 39641.9 931.718   1
   0  -1   6 38456.0 981.155   1
   0   1   6 39122.5 997.018   1
   0   1   6 38258.2 906.886   3
   0   1  -7-20.0874 78.4083   5
   0  -1  -7-78.0201 72.5700   5
   0   1   7-5.32070 148.530   1
   0  -1   7-60.0424 136.242   1
   0   1  -8 8323.72 345.916   5
   0  -1  -8 8312.70 319.824   5
   0   1   8 7790.38 480.537   1
   0  -1   8 8413.20 483.750   1
   0   1   9 896.446 215.245   1
   0   1  -9 798.798 128.620   5
   0  -1  -9 1039.85 126.951   5
   0  -1   9 901.250 217.465   1
   0   1  10 1101.05 228.636   1
   0  -1  10 1004.50 239.324   1
   0   1 -10 867.704 133.261   5
   0  -1 -10 1202.91 139.431   5
   0   1  11 2507.94 347.418   1
   0  -1  11 2389.21 349.455   1
   0  -1 -11 2692.59 195.748   5
   0   1 -11 2574.89 213.673   5
   0   1  12-138.621 221.836   1
   0  -1  12-126.172 198.161   1
   0  -1  13 250.904 223.696   1
   0   1  13 108.784 210.761   1
   0  -1  14-309.153 246.374   1
   0   1  14 171.778 212.319   1
   0  -1  15-9.23538 246.151   1
   0   1  15-90.7981 222.576   1
   0  -1  16 871.993 313.739   1
   0   1  16 1037.09 325.186   1
   0   1  17 196.937 288.649   1
   0  -1  17 260.723 265.085   1
   0   2   2 21432.7 390.905   5
   0  -2  -2 20829.9 385.418   5
   0   2  -2 21450.5 459.517   1
   0   2   2 21726.8 446.423   3
   0  -2   2 22513.2 469.349   1
   0  -2  -2 21134.2 447.337   3
   0   2  -3 300229. 3981.19   1
   0  -2  -3 290585. 3819.62   5
   0  -2  -3 289788. 3979.43   3
   0  -2   3 299479. 4007.98   1
   0   2   3 293093. 3957.66   3
   0   2   3 295676. 4017.27   1
   0   2   3 296233. 3836.02   5
   0   2   4 37106.0 837.236   1
   0   2   4 38332.1 784.403   3
   0  -2  -4 37640.6 652.238   5
   0   2   4 36666.3 674.337   5
   0  -2   4 37291.0 830.343   1
   0  -2  -4 36099.0 803.013   3
   0   2  -4 38613.7 801.008   1
   0   2  -5 17430.6 540.658   1
   0   2   5 17668.3 585.207   1
   0   2   5 17233.8 521.379   3
   0  -2  -5 17155.9 405.990   5
   0  -2   5 17783.0 572.608   1
   0   2   5 16873.2 418.904   5
   0  -2  -6 84957.0 1333.39   5
   0   2   6 84206.2 1548.85   3
   0   2  -6 86058.4 1574.31   1
   0   2   6 83286.3 1642.79   1
   0  -2   6 84677.9 1651.43   1
   0  -2  -7 30331.3 656.498   5
   0  -2   7 29976.6 913.323   1
   0   2   7 29868.8 912.807   1
   0  -2  -8 3064.38 188.096   5
   0   2   8 2892.29 300.681   1
   0  -2   8 2476.23 284.671   1
   0  -2   9 32755.9 1083.17   1
   0  -2  -9 34086.3 744.419   5
   0   2   9 33956.8 1094.92   1
   0   2  -9 36266.6 829.590   5
   0   2 -10 1294.28 162.029   5
   0  -2  10 1231.74 255.103   1
   0   2  10 1049.84 242.112   1
   0  -2 -10 1232.32 134.415   5
   0   2  11 9926.85 646.292   1
   0  -2  11 10777.8 659.848   1
   0  -2  11 9155.52 290.103   4
   0  -2 -11 10054.8 366.599   5
   0  -2  12 17094.8 885.081   1
   0   2  12 17794.7 901.220   1
   0  -2  13 7877.46 622.215   1
   0   2  13 8410.56 661.211   1
   0  -2  14 1031.83 277.014   1
   0   2  14 1329.95 325.992   1
   0   2  15 1998.80 418.508   1
   0  -2  15 1766.30 357.515   1
   0  -2  16 2994.85 460.653   1
   0   2  16 2604.53 438.500   1
   0  -2  17 6221.97 682.412   1
   0   2  17 7921.25 726.527   1
   0  -3  -2 7605.33 226.162   5
   0  -3  -2 7453.55 260.230   3
   0   3   2 7797.15 231.066   5
   0  -3   2 8158.39 268.779   1
   0   3  -2 8122.60 263.687   1
   0   3   3 30984.9 636.655   3
   0  -3  -3 28947.6 640.429   3
   0   3   3 29320.0 559.396   5
   0   3  -3 30992.1 654.053   1
   0  -3  -3 29550.2 549.254   5
   0  -3   3 30111.1 667.245   1
   0   3  -4 7374.67 316.192   1
   0  -3   4 7649.85 348.742   1
   0   3   4 7614.71 346.058   1
   0  -3  -4 7670.12 337.276   3
   0   3   4 7818.91 320.036   3
   0   3   4 7353.02 258.368   5
   0  -3  -4 7844.47 245.297   5
   0   3  -5 14774.7 491.691   1
   0  -3  -5 14465.6 369.514   5
   0  -3   5 14531.6 524.262   1
   0  -3  -5 14636.1 503.204   3
   0   3   5 14269.7 396.520   5
   0   3   5 13770.9 518.345   1
   0   3   5 14566.5 482.507   3
   0   3  -6 13881.9 511.472   1
   0  -3   6 13340.6 551.142   1
   0   3   6 12631.3 389.086   5
   0   3   6 13386.2 491.801   3
   0   3   6 13258.9 553.018   1
   0  -3  -6 12897.5 519.600   3
   0  -3  -6 14020.8 374.609   5
   0  -3  -7 8551.32 292.084   5
   0  -3   7 8744.65 457.526   1
   0   3   7 7690.26 447.711   1
   0   3   8 598.854 191.145   1
   0  -3  -8 772.565 107.043   5
   0  -3   8 689.762 177.109   1
   0  -3   8 664.173 56.7813   4
   0  -3   9-115.493 170.225   1
   0   3   9-18.5692 162.255   1
   0  -3   9 46.4160 30.7774   4
   0  -3  -9-36.7413 68.0538   5
   0  -3  10 7.27801 23.9171   4
   0  -3 -10 39.2700 64.6765   5
   0  -3  10-133.868 174.476   1
   0   3  10-63.0694 166.521   1
   0  -3  11-67.0819 193.470   1
   0  -3 -11-58.5703 80.2936   5
   0   3  11-118.524 182.611   1
   0  -3  12 2338.14 360.421   1
   0   3  12 1776.41 340.689   1
   0   3  13 198.306 224.555   1
   0  -3  13-270.080 206.192   1
   0   3  14 229.434 233.051   1
   0  -3  14 256.799 243.269   1
   0   3  15-189.011 251.864   1
   0  -3  15-66.4934 234.530   1
   0  -3  16 1138.70 337.166   1
   0   3  16 1102.59 352.790   1
   0  -3  17 1486.11 384.726   1
   0   3  17 927.644 325.994   1
   0   4   0 165784. 2267.63   2
   0  -4   0 174646. 2272.78   2
   0  -4  -1 56388.9 909.971   6
   0   4  -1 60404.0 952.493   1
   0  -4   1 57200.8 898.368   2
   0   4   2 14184.1 369.362   6
   0   4   2 14289.6 366.808   5
   0  -4   2 14753.4 403.610   1
   0   4  -2 14239.8 388.170   1
   0  -4  -3 74461.2 1147.78   5
   0   4   3 72572.2 1157.51   5
   0   4  -3 71424.4 1048.42   4
   0   4  -3 74784.1 1250.42   1
   0  -4   3 75001.1 1276.47   1
   0  -4  -3 72064.3 1249.70   3
   0  -4  -4 17143.5 515.120   3
   0   4  -4 15953.7 311.790   4
   0   4   4 19114.3 515.201   3
   0   4   4 17757.8 430.732   5
   0  -4  -4 17552.3 416.489   5
   0   4  -4 18127.9 517.281   1
   0  -4   4 18496.3 546.891   1
   0   4   5 198063. 2936.63   3
   0   4   5 196024. 3036.74   1
   0  -4   5 194831. 3005.17   1
   0  -4  -5 194360. 2714.98   5
   0   4   5 196112. 2752.54   5
   0  -4  -5 192801. 2966.91   3
   0   4  -5 200515. 2945.70   1
   0  -4  -6 11055.2 340.006   5
   0  -4  -6 10476.4 472.636   3
   0  -4   6 11296.7 498.523   1
   0   4   6 10717.0 368.738   5
   0   4   6 10721.1 502.224   1
   0  -4  -7 37065.6 744.822   5
   0  -4   7 39388.4 1066.72   1
   0   4   7 36550.8 794.497   5
   0  -4  -7 39330.7 1011.45   3
   0   4   7 38022.0 1057.49   1
   0  -4   8 19836.6 763.570   1
   0   4   8 19314.0 786.136   1
   0  -4  -8 19504.5 499.000   5
   0  -4   9 18585.6 768.048   1
   0   4   9 17055.1 765.526   1
   0  -4  -9 16417.7 463.963   5
   0  -4 -10 5983.79 268.665   5
   0   4  10 6646.38 509.728   1
   0  -4  10 6639.11 491.747   1
   0  -4  11 7560.76 573.495   1
   0  -4 -11 7784.33 312.552   5
   0   4  11 8294.95 595.790   1
   0   4  12 3143.97 407.955   1
   0  -4  12 2853.00 379.817   1
   0  -4  13 10034.8 702.986   1
   0   4  13 9753.25 701.545   1
   0  -4  14 985.205 291.097   1
   0   4  14 1479.94 350.712   1
   0  -4  15 2263.72 404.853   1
   0   4  15 2245.73 415.360   1
   0  -4  16 1378.68 382.849   1
   0   4  16 818.794 320.992   1
   0   4  17 3191.70 521.355   1
   0  -4  17 2456.09 459.165   1
   0  -5   0 29.3768 66.9368   2
   0   5   0 11.4611 57.7024   2
   0  -5  -1 61.6525 67.7922   6
   0   5  -1 160.524 76.8842   1
   0  -5   1-48.7299 69.2240   2
   0   5  -2 1042.87 123.090   1
   0   5   2 1172.40 118.300   6
   0  -5   2 1046.74 131.795   1
   0   5   2 1025.24 121.580   5
   0   5  -3 633.128 111.968   1
   0   5   3 816.053 114.531   5
   0  -5  -3 862.093 134.688   3
   0  -5  -3 620.347 94.5811   5
   0  -5   3 848.336 139.896   1
   0   5   3 709.825 110.848   6
   0   5   4 976.886 123.281   5
   0   5  -4 814.598 133.638   1
   0  -5  -4 1022.22 143.397   3
   0   5  -4 867.701 75.3204   4
   0  -5  -4 1061.92 112.774   5
   0  -5   4 1262.17 165.058   1
   0   5  -5 15143.8 308.583   4
   0   5   5 16208.1 583.320   1
   0  -5  -5 16318.3 428.962   5
   0   5  -5 16714.4 536.547   1
   0  -5   5 16882.1 581.292   1
   0   5   5 17174.8 456.989   5
   0  -5  -5 16500.5 556.356   3
   0  -5  -6 120.921 138.226   3
   0  -5   6-64.5511 141.731   1
   0  -5  -6-120.109 85.0669   5
   0   5   6-30.5665 80.1982   5
   0   5   6 208.338 167.661   1
   0  -5  -7 20369.8 509.083   5
   0  -5  -7 20056.4 702.738   3
   0   5   7 21094.9 565.186   5
   0  -5   7 20019.2 745.272   1
   0   5   7 20597.6 762.240   1
   0   5   8-27.5674 159.035   1
   0  -5   8 26.2041 171.574   1
   0  -5  -8-90.5621 79.9353   5
   0   5   8 30.3403 81.6139   5
   0  -5  -8 22.7055 129.304   3
   0   5   9 404.094 182.044   1
   0  -5  -9 263.676 79.6031   5
   0  -5   9 374.186 176.806   1
   0  -5 -10 189.122 71.6409   5
   0  -5  10-136.907 191.248   1
   0   5  10 98.2013 163.531   1
   0  -5  11 1429.45 277.646   1
   0   5  11 1069.69 259.268   1
   0   5  12 5355.21 508.641   1
   0  -5  12 5193.03 516.574   1
   0  -5  13 353.564 238.583   1
   0   5  13-7.98473 210.429   1
   0  -5  14 75.0814 210.151   1
   0   5  14 590.119 282.411   1
   0   5  15 423.786 233.686   1
   0  -5  15 535.564 273.490   1
   0  -5  16 124.011 227.979   1
   0   5  16 56.5329 247.450   1
   0  -5  17 87.4351 261.423   1
   0   5  17-14.1958 255.674   1
   0  -6   0 57435.1 941.342   2
   0   6   0 57778.9 928.906   2
   0  -6   1 652.173 96.7866   2
   0   6  -1 635.395 105.076   1
   0  -6  -1 606.726 94.3608   6
   0   6   1 557.645 85.2163   2
   0  -6  -2 74009.0 1236.05   6
   0   6   2 71014.3 1267.79   5
   0  -6   2 74680.4 1286.53   1
   0  -6   2 73397.2 1208.43   2
   0   6  -2 75596.7 1269.69   1
   0  -6   3 2767.57 213.229   1
   0   6  -3 3280.49 211.066   1
   0   6   3 2554.60 186.446   5
   0   6   3 2781.01 190.899   6
   0   6   4 123581. 1964.00   6
   0   6   4 122217. 1897.88   5
   0  -6  -4 122743. 1863.92   5
   0   6  -4 120644. 1737.25   4
   0  -6  -4 120853. 2012.60   3
   0  -6   4 123335. 2030.79   1
   0   6  -4 124196. 1981.83   1
   0   6  -5 238.919 111.112   1
   0  -6   5 199.078 123.790   1
   0  -6  -5-57.1845 122.970   3
   0  -6  -5 97.0475 80.3361   5
   0   6  -5 102.608 43.6100   4
   0   6   5 73.2116 89.6897   5
   0   6   6 64730.8 1448.34   1
   0  -6  -6 66033.8 1383.75   3
   0   6   6 65871.0 1208.56   5
   0  -6  -6 65231.2 1149.14   5
   0  -6   6 67892.8 1439.14   1
   0  -6  -7 2998.53 189.336   5
   0  -6   7 2772.32 290.136   1
   0   6   7 3014.16 210.584   5
   0   6   7 2939.27 310.206   1
   0  -6  -7 2912.06 277.350   3
   0   6   8 54981.0 1111.69   5
   0  -6   8 56189.7 1415.55   1
   0  -6  -8 55961.3 1036.78   5
   0  -6  -8 56789.1 1368.06   3
   0   6   8 58552.2 1463.74   1
   0  -6  -9 1679.23 247.619   3
   0   6   9 2030.20 187.763   5
   0   6   9 2131.38 306.349   1
   0  -6   9 1898.62 287.281   1
   0  -6  -9 2177.72 167.400   5
   0  -6  10 1130.02 230.160   1
   0   6  10 1195.55 265.732   1
   0  -6 -10 1334.03 137.586   5
   0  -6  11 5333.30 468.412   1
   0   6  11 5468.16 504.671   1
   0  -6  12 24477.4 1063.67   1
   0   6  12 25751.7 1110.55   1
   0  -6  13 310.585 217.392   1
   0   6  13 717.655 283.007   1
   0   6  14 4976.00 549.512   1
   0  -6  14 5016.47 529.215   1
   0  -6  15-479.043 259.080   1
   0   6  15 128.250 248.389   1
   0  -6  16 2128.06 399.047   1
   0   6  16 3037.86 478.625   1
   0  -6  17-155.765 237.867   1
   0   6  17-538.472 329.479   1
   0   7   0-13.7864 62.9713   2
   0  -7   0-1.98654 71.5523   2
   0  -7  -1 6272.88 258.177   6
   0   7  -1 6644.23 287.941   1
   0  -7   1 6427.63 257.188   2
   0   7   1 5932.00 237.158   2
   0   7   2 50.7043 97.0184   5
   0  -7  -2 110.372 86.8908   6
   0  -7   2 203.832 102.841   2
   0   7  -2 131.816 99.8264   1
   0  -7   3 121.381 109.632   1
   0   7   3-81.7821 103.596   5
   0   7   3 75.8605 83.5513   6
   0   7  -3-2.33748 92.0462   1
   0  -7  -4 29499.4 784.358   3
   0  -7   4 29933.6 805.974   1
   0   7  -4 31316.7 763.190   1
   0   7   4 30446.4 732.330   5
   0   7  -4 30391.3 608.134   4
   0   7   4 30876.7 744.579   6
   0   7   5 32062.3 762.060   5
   0   7   5 33489.6 826.823   6
   0  -7  -5 32178.6 867.535   3
   0   7  -5 32694.1 616.354   4
   0   7  -5 33787.9 830.236   1
   0  -7   5 33062.6 889.891   1
   0  -7   6 1613.88 229.525   1
   0   7   6 1524.17 159.001   5
   0   7   6 1457.85 223.374   1
   0  -7  -6 1559.78 216.206   3
   0   7  -6 1391.56 94.5159   4
   0  -7  -6 1418.25 143.825   5
   0  -7   7 96.8055 137.074   1
   0   7   7 211.662 167.104   1
   0  -7  -7 239.868 162.480   3
   0  -7  -7 227.652 82.0228   5
   0   7   7 241.847 110.190   5
   0  -7   8 614.810 185.235   1
   0  -7  -8 370.570 96.0794   5
   0   7   8 488.654 185.639   1
   0  -7  -8 634.131 190.275   3
   0   7   8 377.298 103.569   5
   0   7   9 368.658 200.059   1
   0  -7  -9 516.758 189.311   3
   0   7   9 231.883 97.6355   5
   0  -7   9 290.933 189.384   1
   0  -7  -9 241.245 81.7835   5
   0  -7  10 4027.36 404.432   1
   0   7  10 3948.99 413.933   1
   0  -7 -10 3869.38 223.135   5
   0   7  10 3856.74 262.620   5
   0   7  11 8491.08 614.199   1
   0  -7  11 9563.81 625.266   1
   0   7  12 363.983 249.133   1
   0  -7  12-195.919 210.206   1
   0   7  13 7.87788 211.645   1
   0  -7  13 100.913 199.994   1
   0  -7  14 361.621 261.248   1
   0   7  14 505.256 250.269   1
   0  -7  15 172.641 235.377   1
   0   7  15 247.924 256.046   1
   0   7  16 810.024 304.976   1
   0  -7  16 739.856 285.585   1
   0   7  17-12.7444 245.495   1
   0  -7  17 131.366 273.579   1
   0  -8   0 29975.4 647.061   2
   0   8   0 31395.8 634.019   2
   0   8   1 49672.5 894.610   2
   0  -8   1 48577.0 920.383   2
   0   8  -1 52146.3 1005.78   1
   0  -8  -2 15316.6 471.295   6
   0  -8   2 15816.2 459.137   2
   0   8  -2 16585.4 509.191   1
   0   8   2 15652.1 522.704   5
   0  -8   3 31749.9 747.919   2
   0   8  -3 32985.6 781.907   1
   0   8   3 33573.8 753.974   6
   0   8   3 31479.0 791.570   5
   0  -8   3 31951.7 811.504   1
   0   8  -4 6461.59 329.380   1
   0   8   4 6112.86 312.865   6
   0   8   4 6230.77 324.486   5
   0  -8   4 6357.47 353.786   1
   0  -8  -5 24354.4 755.149   3
   0  -8   5 24430.5 780.259   1
   0   8   5 24417.4 679.948   5
   0   8  -5 25122.8 546.205   4
   0  -8   6 46083.7 1149.88   1
   0  -8  -6 43694.4 1099.47   3
   0   8  -6 43101.7 764.178   4
   0   8   6 42211.3 955.396   5
   0   8  -7 14921.9 325.989   4
   0   8   7 14901.9 679.146   1
   0  -8   7 15073.2 643.978   1
   0   8   7 14543.9 513.731   5
   0  -8  -7 15321.0 642.198   3
   0  -8  -7 15655.7 479.450   5
   0   8   8 13505.6 675.561   1
   0  -8  -8 14330.5 634.239   3
   0   8   8 14115.5 505.432   5
   0  -8   8 14312.0 670.023   1
   0  -8  -8 13931.1 449.096   5
   0  -8   9 20068.6 820.711   1
   0  -8  -9 18910.1 783.841   3
   0   8   9 18235.7 595.009   5
   0  -8  -9 18715.3 530.203   5
   0   8   9 17843.7 823.726   1
   0   8  10 4090.59 280.012   5
   0  -8 -10 3822.63 230.622   5
   0  -8 -10 4059.08 392.608   3
   0   8  10 4112.27 410.444   1
   0  -8  10 5191.09 444.202   1
   0   8  11 7835.50 586.367   1
   0   8  11 6012.39 337.107   5
   0  -8  11 6655.24 541.099   1
   0   8  12 5468.15 531.810   1
   0  -8  12 5341.56 501.643   1
   0  -8  13 5942.56 563.243   1
   0   8  13 5580.92 562.615   1
   0  -8  14 2357.33 396.877   1
   0   8  14 2070.52 408.204   1
   0   8  15 8039.86 718.152   1
   0  -8  15 7871.07 678.093   1
   0   8  16 2481.85 430.135   1
   0  -8  16 2213.32 404.368   1
   0   8  17 1464.80 412.644   1
   0  -8  17 1292.85 365.165   1
   0   9   0 27.8101 73.3303   2
   0  -9  -1 6273.07 288.460   6
   0  -9   1 6490.40 283.220   2
   0   9  -1 6252.96 315.403   1
   0   9   1 6065.66 260.758   2
   0   9  -2 45388.2 967.597   1
   0  -9  -2 44705.4 929.491   6
   0  -9   2 43641.1 903.636   2
   0   9   2 44321.4 1017.26   5
   0   9  -3 1915.78 188.809   1
   0  -9   3 1780.91 187.972   2
   0   9   3 1956.76 206.341   5
   0   9   4 2768.37 220.430   6
   0  -9   4 2917.12 260.190   1
   0   9  -4 3086.32 237.584   1
   0   9   4 3179.85 253.160   5
   0  -9  -5 920.940 181.814   3
   0  -9   5 786.997 160.480   1
   0   9  -5 709.081 103.133   4
   0   9   5 791.617 155.514   5
   0   9   6 1113.34 164.809   5
   0  -9   6 1054.42 197.056   1
   0   9  -6 1092.23 109.718   4
   0  -9  -6 1147.64 202.782   3
   0   9   7-1.03419 98.2230   5
   0  -9  -7 24.9244 128.199   3
   0  -9   7 6.22054 143.973   1
   0   9  -7 209.808 60.0399   4
   0   9   7 17.2503 153.150   1
   0   9   8 82.2201 101.544   5
   0  -9  -8 292.082 167.745   3
   0   9   8-27.8854 168.653   1
   0  -9   8-172.134 175.100   1
   0  -9  -9 823.312 213.763   3
   0   9   9 774.013 224.322   1
   0   9   9 456.039 128.346   5
   0  -9   9 785.691 226.162   1
   0   9  10 187.574 103.735   5
   0   9  10 111.995 179.841   1
   0  -9  10 346.605 185.454   1
   0  -9 -10 187.979 171.998   3
   0   9  11 1498.93 181.847   5
   0   9  11 1334.29 306.203   1
   0  -9 -11 1557.31 266.229   3
   0  -9  11 1657.49 298.749   1
   0   9  12-37.3245 208.889   1
   0  -9  12 171.172 229.053   1
   0   9  13-91.5986 224.345   1
   0  -9  13-115.798 209.926   1
   0  -9  14 352.302 254.317   1
   0   9  14-432.678 292.409   1
   0  -9  15 81.4731 246.143   1
   0   9  15-228.363 221.432   1
   0   9  16-48.2365 262.826   1
   0  -9  16-91.1402 220.066   1
   0  -9  17 193.637 253.031   1
   0  10   0 586.088 98.3117   2
   0 -10   1 76583.2 1348.84   2
   0  10   1 77855.8 1308.82   2
   0  10  -1 80585.6 1456.16   1
   0 -10   2 3014.39 220.049   2
   0  10  -2 2903.54 219.447   1
   0 -10  -2 2810.58 216.006   6
   0  10   2 3025.93 268.167   5
   0  10   2 2815.73 193.660   2
   0 -10   3 49527.8 1033.00   2
   0  10  -3 49950.4 1079.37   1
   0  10   3 49403.6 1134.23   5
   0 -10   4 5471.15 322.662   2
   0  10   4 5850.52 349.354   5
   0  10   4 6083.75 321.214   6
   0 -10   4 6047.90 370.243   1
   0  10  -5 17019.9 480.358   4
   0 -10  -5 15919.2 622.407   3
   0  10   5 17326.3 607.059   5
   0 -10   5 17465.6 658.533   1
   0 -10   6-108.037 151.618   1
   0  10   6 77.2254 110.277   5
   0  10  -6-15.3655 67.0832   4
   0 -10  -6 221.683 154.256   3
   0  10  -7 28004.3 583.620   4
   0 -10  -7 27196.4 914.948   3
   0  10   7 27201.9 786.777   5
   0 -10   7 28358.0 951.686   1
   0  10   8 3196.91 356.205   1
   0  10   8 3193.01 265.075   5
   0 -10   8 3128.33 326.518   1
   0 -10  -8 3336.14 337.720   3
   0  10  -8 3028.27 140.348   4
   0  10   9 27507.5 1061.97   1
   0 -10  -9 26879.4 962.553   3
   0  10   9 26782.2 784.405   5
   0 -10   9 27789.6 1009.82   1
   0 -10  10 8.23401 203.538   1
   0 -10 -10-7.98177 166.660   3
   0  10  10 61.2483 105.897   5
   0  10  10-0.72768 175.177   1
   0 -10 -11 21035.3 898.746   3
   0  10  11 17864.4 632.865   5
   0 -10  11 21006.0 951.861   1
   0  10  11 20092.0 959.454   1
   0  10  12 6752.36 584.487   1
   0 -10  12 6388.42 546.338   1
   0 -10  13 5547.72 536.739   1
   0  10  13 5760.27 559.211   1
   0  10  14 1368.07 316.468   1
   0 -10  14 1511.11 333.443   1
   0  10  15 2619.23 457.125   1
   0 -10  15 3100.60 442.150   1
   0  10  16 2452.63 458.898   1
   0 -10  16 2095.57 427.227   1
   0 -10  17 1047.81 337.311   1
   0  11   0 40.6981 81.2898   2
   0  11   1 1996.25 165.611   2
   0 -11  -1 1869.95 191.193   6
   0  11  -1 2106.90 210.303   1
   0 -11   1 1862.78 175.611   2
   0 -11  -2 1046.20 153.216   6
   0  11   2 1492.13 206.833   5
   0  11   2 1049.12 142.377   2
   0 -11   2 989.834 152.533   2
   0  11  -2 948.876 153.586   1
   0 -11   3 2729.11 218.903   2
   0  11   3 2760.95 272.313   5
   0  11   4 4598.04 327.436   5
   0 -11   4 4559.96 298.318   2
   0 -11   5 3512.55 282.594   2
   0  11   5 3769.07 293.668   5
   0 -11   5 3518.83 318.789   1
   0 -11   6 585.319 170.314   1
   0  11  -6 541.613 96.8400   4
   0  11   6 627.509 152.611   5
   0 -11  -6 562.095 177.802   3
   0 -11   7 270.662 152.959   1
   0 -11  -7 347.892 152.556   3
   0  11   7 301.080 136.231   5
   0  11  -7 313.801 76.1825   4
   0  11  -8 1848.85 123.477   4
   0 -11  -8 1416.25 234.032   3
   0 -11   8 1937.95 288.379   1
   0  11   8 1339.24 248.472   1
   0  11   8 2100.15 230.997   5
   0 -11  -9 322.163 178.619   3
   0  11   9 392.899 130.355   5
   0 -11   9 460.589 182.984   1
   0  11   9 630.780 202.525   1
   0 -11  10 1707.93 305.666   1
   0  11  10 1468.47 204.919   5
   0  11  10 912.488 241.854   1
   0 -11 -10 1070.37 238.524   3
   0  11  11 1154.74 192.054   5
   0 -11  11 1332.91 284.839   1
   0  11  11 937.417 273.607   1
   0 -11 -11 1251.43 272.074   3
   0 -11  12 67.9664 196.935   1
   0  11  12-54.9837 209.759   1
   0 -11 -12 131.918 182.119   3
   0 -11  13-102.157 205.768   1
   0  11  13 83.1725 209.265   1
   0  11  14-45.8572 249.515   1
   0 -11  14-158.133 224.654   1
   0 -11  15 55.1910 242.147   1
   0  11  15 390.366 273.560   1
   0 -11  16 52.7816 232.468   1
   0  11  16-192.048 235.649   1
   0 -11  17 115.559 270.289   1
   0  12   0 120673. 1905.12   2
   0 -12  -1 4535.41 281.975   6
   0  12   1 4440.68 239.108   2
   0 -12   1 3952.38 250.226   2
   0  12   2 58537.3 1118.61   2
   0  12   2 59566.6 1371.50   5
   0 -12  -2 57805.2 1199.06   6
   0 -12   2 58634.2 1167.01   2
   0 -12   3 10334.4 436.459   2
   0  12   3 9502.72 392.171   2
   0  12   3 10909.0 523.848   5
   0 -12   4 45011.0 1056.14   2
   0  12   4 45417.0 1154.16   5
   0 -12   5 8111.70 436.488   2
   0  12   5 7676.50 430.922   5
   0 -12   5 8104.41 463.416   1
   0  12  -6 40976.2 859.344   4
   0 -12   6 38642.3 1119.70   1
   0 -12  -6 38139.6 1109.88   3
   0  12   6 38140.0 1032.87   5
   0 -12   7 894.154 202.396   1
   0  12  -7 809.559 108.337   4
   0  12   7 772.783 164.817   5
   0 -12  -7 1114.37 211.755   3
   0 -12  -8 3827.24 365.096   3
   0  12   8 3471.03 388.672   1
   0 -12   8 3566.34 369.997   1
   0  12   8 3331.06 294.135   5
   0  12  -8 3752.97 192.089   4
   0 -12   9 435.091 211.315   1
   0  12   9 95.7395 178.513   1
   0 -12  -9 13.4972 172.100   3
   0  12   9 211.953 135.835   5
   0  12  10 12859.6 556.274   5
   0 -12 -10 13249.8 714.293   3
   0  12  10 12805.0 763.776   1
   0 -12  10 13244.5 745.199   1
   0  12  11 90.0118 211.629   1
   0  12  11-2.98952 110.035   5
   0 -12 -11-184.710 202.145   3
   0 -12  11 2.86413 179.591   1
   0 -12 -12 8581.77 619.128   3
   0 -12  12 8213.36 643.486   1
   0  12  12 9079.49 695.199   1
   0 -12  13-65.6657 230.613   1
   0  12  13 63.9159 237.777   1
   0  12  14 3290.83 486.965   1
   0 -12  14 3777.99 471.327   1
   0 -12  15 852.380 285.149   1
   0  12  15 1252.97 348.323   1
   0 -12  16 2541.57 440.460   1
   0  12  16 2770.61 476.540   1
   0 -12  17-8.36559 251.887   1
   0  13   0 393.963 108.959   2
   0 -13  -1 4354.47 277.553   6
   0 -13   1 4032.08 270.301   2
   0  13   1 4427.04 248.290   2
   0  13   2 1139.30 223.265   5
   0  13   2 1172.79 140.362   2
   0 -13   2 1053.84 163.374   2
   0 -13  -2 1008.90 163.994   6
   0  13   3 118.552 131.153   5
   0 -13   3 111.163 110.691   2
   0  13   3 89.8132 92.8679   2
   0 -13  -3 212.052 122.271   6
   0  13   4 1117.48 200.638   5
   0 -13   4 1082.39 165.589   2
   0 -13   5-49.1994 130.052   2
   0  13   5 369.913 170.105   5
   0 -13   6 1173.13 208.426   2
   0 -13  -6 1218.93 229.631   3
   0  13  -6 953.877 133.183   4
   0 -13   6 1307.45 233.995   1
   0  13   6 1024.83 183.480   5
   0 -13  -7 1844.09 274.520   3
   0  13   7 1998.38 243.238   5
   0  13  -7 2072.81 171.767   4
   0 -13   7 1839.23 264.030   1
   0 -13  -8 4886.67 419.760   3
   0  13   8 5130.39 371.898   5
   0 -13   8 4704.02 414.603   1
   0 -13   9 2449.16 328.865   1
   0  13   9 2714.84 362.241   1
   0  13   9 2852.75 275.966   5
   0 -13  -9 2725.07 338.055   3
   0 -13 -10 45.5852 180.976   3
   0 -13  10 103.794 169.653   1
   0  13  10-70.7670 134.867   5
   0  13  10 104.845 217.711   1
   0 -13  11-20.0584 188.019   1
   0  13  11-260.114 140.197   5
   0 -13 -11 16.4546 174.742   3
   0  13  11 84.2012 208.005   1
   0 -13 -12 27.9574 176.672   3
   0  13  12-331.890 234.855   1
   0 -13  12-395.347 216.577   1
   0 -13  13 109.811 209.976   1
   0  13  13 553.865 285.128   1
   0 -13  14 2002.52 388.779   1
   0  13  14 2109.64 427.604   1
   0  13  15 7.36659 248.743   1
   0 -13  15 204.139 268.468   1
   0 -13  16-35.7717 239.256   1
   0  14   0 52911.0 1054.61   2
   0 -14  -1 40713.9 971.822   6
   0  14   1 39967.4 891.183   2
   0 -14   1 41444.6 945.975   2
   0 -14   2 12369.2 482.708   2
   0 -14  -2 12532.2 504.121   6
   0  14   2 12714.9 612.494   5
   0  14   2 12386.3 441.507   2
   0  14   3 25886.2 708.227   2
   0 -14   3 25760.6 759.430   2
   0 -14  -3 25689.7 778.980   6
   0  14   3 26936.6 924.789   5
   0  14   4 11347.4 573.081   5
   0 -14   4 10550.5 483.972   2
   0  14   5 9075.03 508.837   5
   0 -14   5 8524.90 460.159   2
   0  14   6 16223.9 685.144   5
   0 -14   6 16957.1 665.998   2
   0 -14  -6 15342.0 701.108   3
   0 -14  -7 4502.58 402.238   3
   0 -14   7 4692.08 379.870   2
   0  14   7 4807.27 381.119   5
   0 -14   7 5284.22 424.556   1
   0 -14   8 17481.9 741.290   2
   0 -14   8 15906.2 775.732   1
   0  14   8 17399.7 702.635   5
   0 -14  -8 17104.0 789.501   3
   0 -14   9 14327.8 744.931   1
   0  14   9 13502.3 763.338   1
   0 -14  -9 12739.2 697.851   3
   0  14   9 14079.1 622.399   5
   0  14  10 8241.98 638.773   1
   0  14  10 9093.65 497.279   5
   0 -14 -10 9565.65 615.767   3
   0 -14  10 9777.97 633.036   1
   0 -14  11 458.122 248.635   1
   0 -14 -11 164.724 168.637   3
   0  14  11 251.151 215.203   1
   0  14  12 4434.57 496.323   1
   0 -14  12 3986.27 453.614   1
   0 -14 -12 4025.17 442.691   3
   0 -14 -13 2311.70 348.117   3
   0  14  13 3209.49 455.912   1
   0 -14  13 2055.20 388.648   1
   0 -14  14 1549.17 343.722   1
   0  14  14 1200.63 357.373   1
   0 -14  15 4678.55 536.624   1
   0  14  15 3857.21 521.295   1
   0 -14  16 816.051 323.133   1
   0  15   0 144.070 91.9394   2
   0  15   1 295.588 101.057   2
   0 -15  -1 371.951 138.941   6
   0  15   2 4452.75 273.755   2
   0  15   2 5114.72 413.587   5
   0 -15  -2 4798.72 324.137   6
   0 -15   2 4740.09 309.073   2
   0  15   3 638.436 210.229   5
   0 -15  -3 568.308 164.016   6
   0 -15   3 292.777 134.644   2
   0  15   4 9494.94 549.758   5
   0 -15   4 9213.99 455.892   2
   0  15   5 6462.64 470.996   5
   0 -15   5 7684.04 432.824   2
   0 -15   6 4576.27 356.384   2
   0  15   6 4900.08 393.921   5
   0 -15  -6 3789.48 356.553   3
   0 -15   7 3992.48 359.202   2
   0 -15  -7 3800.62 382.932   3
   0  15   7 3736.32 347.630   5
   0 -15   8 806.435 220.127   1
   0 -15   8 1007.80 220.215   2
   0 -15  -8 1210.72 270.451   3
   0  15   8 904.762 198.137   5
   0  15   9-105.096 160.298   5
   0  15   9-52.4552 210.053   1
   0 -15  -9 30.1192 162.125   3
   0 -15   9-185.415 179.970   2
   0 -15   9-190.583 192.968   1
   0 -15 -10-101.946 201.038   3
   0  15  10-158.391 157.741   5
   0 -15  10-275.670 232.764   1
   0  15  10-281.494 219.371   1
   0  15  11 428.445 213.266   1
   0 -15  11 229.124 206.312   1
   0 -15 -11 333.122 193.770   3
   0  15  12 60.0246 240.561   1
   0 -15  12 58.0945 183.363   1
   0 -15 -12 109.899 175.508   3
   0  15  13 898.911 313.085   1
   0 -15 -13 1036.16 287.786   3
   0 -15  13 1168.61 339.413   1
   0 -15  14 426.995 252.116   1
   0  15  14 727.890 314.467   1
   0  15  15 1003.86 342.286   1
   0 -15  15 69.5215 229.409   1
   0 -15  16 323.135 266.343   1
   0 -16  -1 40016.6 1001.83   6
   0  16   1 39804.6 1232.48   5
   0 -16  -2 68.8135 109.872   6
   0 -16   2 105.619 116.513   2
   0  16   2 189.427 191.357   5
   0 -16   3 62141.6 1330.69   2
   0  16   3 60226.7 1557.88   5
   0 -16   4-70.4074 146.273   2
   0  16   4-203.928 175.504   5
   0 -16   5 7456.09 439.892   2
   0  16   5 7583.63 507.425   5
   0  16   6 2876.31 325.021   5
   0 -16   6 2155.06 267.465   2
   0 -16  -7 25171.8 970.234   3
   0  16   7 25306.2 921.667   5
   0 -16   7 25205.9 882.490   2
   0  16   8 1449.43 219.370   5
   0 -16   8 1789.27 268.089   2
   0 -16  -8 1783.62 288.100   3
   0 -16   9 10391.6 653.748   1
   0 -16  -9 11535.8 675.919   3
   0 -16   9 11283.2 636.693   2
   0  16   9 10524.2 687.503   1
   0  16   9 11458.1 597.188   5
   0 -16  10 681.455 243.673   2
   0  16  10 801.043 260.492   1
   0 -16  10 920.436 274.575   1
   0  16  10 684.559 171.166   5
   0 -16 -10 912.955 239.649   3
   0  16  11 6227.27 592.438   1
   0 -16 -11 6418.69 533.242   3
   0 -16  11 7048.29 550.865   2
   0 -16  11 6544.00 550.799   1
   0 -16  12 360.082 233.697   1
   0 -16 -12 771.150 260.379   3
   0  16  12 155.935 238.829   1
   0 -16  13 1875.04 363.910   1
   0  16  13 1929.23 390.306   1
   0 -16 -13 2569.44 379.749   3
   0 -16  14-287.898 267.652   1
   0  16  14-109.681 271.942   1
   0 -16  15 2748.83 424.959   1
   0 -16  16 175.324 262.432   1
   0 -17   0 70.5326 108.663   6
   0 -17  -1 7560.26 417.144   6
   0  17   1 9281.81 580.931   5
   0  17   2 2160.09 337.669   5
   0 -17   2 2691.15 248.664   2
   0 -17  -2 2618.80 250.860   6
   0 -17   3 3406.79 296.330   2
   0  17   3 3481.42 398.125   5
   0 -17   4 2291.59 260.561   2
   0  17   4 2568.56 320.657   5
   0 -17   5 365.338 172.537   2
   0  17   5 887.246 234.168   5
   0 -17   6 3088.63 303.177   2
   0  17   6 3336.45 356.570   5
   0 -17   7 702.890 203.638   2
   0  17   7 836.721 225.076   5
   0 -17  -7 378.553 175.039   3
   0  17   8 94.5872 150.769   5
   0 -17   8 345.878 184.306   2
   0 -17  -8 242.989 171.128   3
   0  17   9-167.180 162.580   5
   0  17   9-23.2067 197.375   1
   0 -17   9-64.7556 166.735   2
   0 -17  -9 157.200 190.689   3
   0  17  10 136.441 214.266   1
   0 -17  10-7.45643 174.253   1
   0 -17 -10-129.796 169.934   3
   0  17  10 58.2393 135.252   5
   0 -17  10-104.662 192.377   2
   0  17  11-17.7117 213.367   1
   0 -17  11-280.094 185.728   2
   0 -17 -11 270.706 208.392   3
   0 -17  11 188.290 190.006   1
   0 -17 -12 1686.93 326.141   3
   0 -17  12 1664.24 309.264   2
   0 -17  12 1727.64 339.416   1
   0  17  12 1705.48 351.785   1
   0 -17  13 253.891 202.896   2
   0 -17 -13 182.263 200.997   3
   0 -17  13 467.471 240.530   1
   0  17  13-7.64928 239.158   1
   0  17  14 218.720 279.277   1
   0 -17 -14-23.0155 217.061   3
   0 -17  14-483.062 272.321   2
   0 -17  14 292.801 230.054   1
   0 -17  15 151.796 242.581   1
   0 -17  15-190.658 232.158   2
   0 -18   0 19689.9 687.029   6
   0 -18  -1 1251.16 185.971   6
   0  18   1 1060.17 260.832   5
   0  18   2 18655.4 865.140   5
   0 -18  -2 19303.1 687.702   6
   0 -18   2 19003.4 672.825   2
   0  18   3 3591.52 392.997   5
   0 -18   3 3843.01 301.693   2
   0 -18   4 26684.7 858.148   2
   0  18   4 26377.8 1025.14   5
   0 -18   5 4912.96 366.910   2
   0  18   5 4543.02 426.448   5
   0  18   6 26458.4 1007.33   5
   0 -18   6 27440.2 915.937   2
   0 -18  -7 1281.95 257.222   3
   0 -18   7 1389.58 246.458   2
   0  18   7 1294.37 254.731   5
   0 -18   8 9265.78 553.031   2
   0 -18  -8 9127.45 609.378   3
   0  18   8 8572.90 556.520   5
   0  18   9 208.248 207.317   1
   0 -18  -9 631.134 215.115   3
   0 -18   9-24.4923 161.990   2
   0  18   9 271.384 160.776   5
   0  18  10 7097.56 624.695   1
   0 -18 -10 7575.44 581.623   3
   0 -18  10 7776.24 555.447   2
   0 -18 -11 254.002 213.137   3
   0  18  11 155.953 223.702   1
   0 -18  11 718.564 264.196   1
   0 -18  11 121.801 180.819   2
   0 -18  12 2299.45 355.372   2
   0 -18  12 2400.94 376.964   1
   0  18  12 2548.35 408.143   1
   0 -18 -12 1733.12 326.321   3
   0  18  13 2797.49 456.268   1
   0 -18  13 4128.00 459.141   2
   0 -18  13 2897.90 411.824   1
   0 -18 -13 3813.65 452.182   3
   0 -18 -14 1418.20 314.824   3
   0 -18  14 1556.56 322.792   2
   0 -18  14 982.849 307.775   1
   0  18  14 1466.81 373.167   1
   0 -18  15 1570.37 379.187   1
   0 -19   0 250.083 132.030   6
   0  19   0 151.824 189.847   5
   0  19   1-386.080 232.876   5
   0 -19  -1 54.1988 114.327   6
   0  19   2 2173.07 333.120   5
   0 -19  -2 2108.25 257.698   6
   0 -19   3 955.232 177.380   2
   0  19   3 1398.14 277.312   5
   0  19   4 5619.30 492.115   5
   0 -19   4 4919.72 374.113   2
   0 -19   5 215.183 160.902   2
   0  19   5 507.133 229.278   5
   0  19   6 46.9937 172.300   5
   0 -19   6 131.821 173.475   2
   0  19   7-25.2417 166.424   5
   0 -19  -7-268.546 198.779   3
   0 -19   7 316.148 175.550   2
   0  19   8 702.685 225.324   5
   0 -19   8 443.870 193.819   2
   0 -19  -8 11.1211 182.118   3
   0 -19  -9 699.246 234.962   3
   0 -19   9 900.776 245.472   2
   0  19   9 789.653 214.546   5
   0  19  10 50.2537 203.855   1
   0 -19 -10 576.219 225.547   3
   0 -19  10 401.434 229.358   2
   0  19  11 1734.26 351.612   1
   0 -19  11 1828.75 336.059   2
   0 -19 -11 1174.51 282.107   3
   0 -19  12-292.077 240.377   2
   0 -19 -12-8.17819 201.398   3
   0  19  12 399.199 236.218   1
   0 -19  13-189.258 230.178   1
   0 -19  13 9.36544 220.390   2
   0  19  13-219.072 230.441   1
   0 -19 -13 181.311 188.494   3
   0 -19  14 1454.83 323.681   2
   0 -19 -14 1638.88 336.506   3
   0 -19  14 997.753 325.022   1
   0 -20   0-16.0413 112.994   6
   0  20   0 412.997 212.078   5
   0 -20  -1 3586.71 306.635   6
   0  20   1 3606.69 413.053   5
   0 -20  -2 13829.1 601.479   6
   0  20   2 14537.9 800.452   5
   0 -20   3 7215.72 425.688   2
   0  20   3 7042.40 555.707   5
   0  20   4 16509.0 847.277   5
   0 -20   4 17013.7 685.929   2
   0 -20   5 11245.3 565.837   2
   0  20   5 10941.5 679.744   5
   0 -20   6 10455.1 563.866   2
   0  20   6 9972.27 638.722   5
   0 -20  -7 3556.64 400.808   3
   0 -20   7 3329.82 337.561   2
   0  20   7 3207.09 370.108   5
   0  20   8 3006.98 363.063   5
   0 -20   8 3858.69 381.603   2
   0 -20  -8 3543.13 406.825   3
   0  20   9 2359.53 314.753   5
   0 -20   9 2704.11 338.430   2
   0 -20  -9 2421.26 352.485   3
   0 -20 -10 4644.39 476.984   3
   0  20  10 6178.44 594.345   1
   0 -20  10 5544.76 472.043   2
   0 -20 -11 932.484 261.360   3
   0 -20  11 1082.24 273.013   2
   0  20  11 679.941 269.246   1
   0 -20 -12 3020.17 405.014   3
   0  20  12 3267.27 471.572   1
   0 -20  12 2903.69 378.792   2
   0 -20 -13 2597.06 389.353   3
   0 -20  13 3239.31 408.742   2
   0  20  13 3076.16 468.511   1
   0 -20 -14 736.098 285.865   3
   0 -20  14 1613.02 344.639   2
   0 -21   0 19.1084 123.519   6
   0  21   0-235.937 224.895   5
   0 -21  -1 1404.43 222.492   6
   0  21  -1 1074.22 296.209   5
   0  21   1 1427.19 323.135   5
   0 -21   1 1011.78 195.488   6
   0  21   2 240.397 228.554   5
   0 -21  -2 287.428 144.776   6
   0  21   3 256.105 204.978   5
   0 -21   4 622.265 172.808   2
   0  21   4 963.280 268.122   5
   0  21   5-32.6094 201.792   5
   0 -21   5 292.563 154.246   2
   0  21   6 2307.66 355.652   5
   0 -21   6 2791.74 307.937   2
   0  21   7-118.385 173.071   5
   0 -21  -7-5.25739 172.823   3
   0 -21   7-87.4888 159.734   2
   0 -21  -8-194.268 189.083   3
   0  21   8-84.9882 190.814   5
   0 -21   8-13.0137 167.902   2
   0 -21   9 164.323 193.063   2
   0 -21  -9 314.089 182.652   3
   0  21   9 241.906 198.082   5
   0 -21 -10 243.811 198.950   3
   0 -21  10-202.417 184.635   2
   0  21  10-206.504 214.857   1
   0  21  11-104.609 228.259   1
   0 -21 -11-315.655 219.781   3
   0 -21  11 385.208 219.738   2
   0  21  12 387.045 260.795   1
   0 -21  12-41.3379 205.087   2
   0 -21 -12 102.513 188.215   3
   0 -21  13-390.840 236.456   2
   0 -21 -13 115.225 213.161   3
   0 -22   0 257.624 128.919   6
   0  22   0 496.159 245.385   5
   0 -22  -1 16055.7 656.258   6
   0 -22   1 15797.8 653.773   6
   0  22  -1 16722.5 926.340   5
   0  22   1 15700.2 885.115   5
   0 -22  -2 251.906 122.156   6
   0  22   2 591.017 261.929   5
   0  22   3 6426.76 562.352   5
   0  22   4 330.094 217.948   5
   0  22   5 13287.2 784.361   5
   0 -22   6-30.3505 142.766   2
   0  22   6 196.003 212.867   5
   0 -22  -7 7605.48 596.208   3
   0  22   7 8664.72 617.736   5
   0 -22   7 8480.61 522.305   2
   0 -22  -8 760.695 243.342   3
   0  22   8 1359.31 273.860   5
   0 -22  -9 4328.04 468.000   3
   0  22  10-129.500 224.063   1
   0 -22 -10 191.481 189.467   3
   0  22  11 7379.08 665.299   1
   0 -22 -11 7892.14 627.896   3
   0 -22 -12 2184.99 376.113   3
   0  23   0 65.2855 222.201   5
   0  23   1 212.835 221.366   5
   0  23  -1 282.354 249.285   5
   0  23  -2 582.289 275.715   5
   0  23   2-109.286 236.245   5
   0  23   3 470.051 241.556   5
   0  23   4-231.661 222.111   5
   0  23   5 650.812 269.975   5
   0  23   6 325.835 209.356   5
   0  23   7-354.474 196.163   5
   0 -23  -7-118.483 208.116   3
   0  23   8-292.281 239.599   5
   0 -23  -8 268.833 215.412   3
   0 -23  -9 1908.48 336.763   3
   0  23  10 700.928 270.652   1
   0 -23 -10 802.246 260.459   3
   0 -23 -11 785.663 272.684   3
   0  23  11 1013.01 323.361   1
   0 -23 -12 114.731 240.308   3
   0  24   0 4297.08 521.923   5
   0  24   1 5923.31 580.332   5
   0  24  -1 5478.05 576.846   5
   0  24   2 9964.37 745.193   5
   0  24  -2 9748.32 747.957   5
   0  24   3 4798.14 507.411   5
   0  24  -3 4270.18 530.759   5
   0  24   4 1668.93 336.319   5
   0  24   5 1126.04 305.636   5
   0  24   6 10625.4 724.717   5
   0  24   7 401.984 197.643   5
   0 -24  -7 869.239 256.966   3
   0  24   8 2938.39 407.258   5
   0 -24  -8 3132.16 404.044   3
   0  24   9-43.0478 218.831   1
   0 -24  -9-284.209 236.730   3
   0 -24 -10 2133.15 363.920   3
   0  24  10 1190.60 300.049   1
   0 -24 -11 815.463 303.143   3
   0  25   0-396.068 265.769   5
   0  25   1 1555.74 363.066   5
   0  25  -1 1343.03 336.837   5
   0  25   2-57.1819 215.313   5
   0  25  -2 169.087 247.317   5
   0  25  -3 673.130 297.871   5
   0  25   3 687.141 279.319   5
   0  25   4 1394.00 351.171   5
   0  25  -4 1069.64 340.701   5
   0  25   5 1171.70 299.602   5
   0  25   6 1015.95 303.176   5
   0 -25  -7 1101.91 273.064   3
   0  25   7 522.148 254.980   5
   0 -25  -8 89.2926 201.150   3
   0 -25  -9-64.8461 213.833   3
   0  25   9 68.7309 228.364   1
   0 -25 -10 88.5395 228.583   3
   0  26   0 9011.53 746.255   5
   0  26   1 1106.33 345.073   5
   0  26  -1 964.175 326.776   5
   0  26  -2 4966.96 584.490   5
   0  26   2 4608.68 537.955   5
   0  26  -3 1313.47 350.466   5
   0  26   3 1392.36 344.573   5
   0  26   4 5094.37 561.477   5
   0  26  -4 5323.10 605.716   5
   0  26   5 1692.06 357.531   5
   0  26  -5 1116.69 363.586   5
   0  26   6 6667.24 607.053   5
   0 -26  -7 348.718 233.414   3
   0  26   7 585.811 258.492   5
   0 -26  -8 539.754 229.266   3
   0  26   9-197.158 256.499   1
   0 -26  -9 158.205 253.005   3
   0  27   0-103.804 248.838   5
   0  27   1 923.343 322.096   5
   0  27  -1 305.265 261.130   5
   0  27   2 213.765 248.726   5
   0  27  -2 1044.10 307.958   5
   0  27   3 278.734 258.691   5
   0  27   4 40.9937 235.253   5
   0  27   5 982.070 322.747   5
   0  27   6 273.824 238.052   5
   0 -27  -7 50.3709 210.711   3
   0  28   3 9274.42 753.435   5
   0  28   4 801.611 271.793   5
   0  28   5 4476.63 538.325   5
   0  28   6 2012.29 406.811   5
   0 -28  -6 1118.95 331.245   3
  -1   0  18 5060.66 613.850   1
  -1   0  17 507.908 277.045   1
  -1   0  16 2780.32 431.485   1
  -1   0  15-171.816 217.088   1
  -1   0  14 1961.91 371.568   1
  -1   0  13 19.2631 188.058   1
  -1   0  12 3260.95 379.758   1
   1   0 -11 22.2801 67.3067   5
  -1   0  11-23.7458 179.161   1
  -1   0  10 8475.46 551.306   1
   1   0 -10 8857.78 330.541   5
  -1   0   9-57.2048 156.339   1
   1   0  -9-33.1908 67.1873   5
   1   0  -8 6947.97 274.424   5
  -1   0   8 7131.98 439.586   1
  -1   0   7 142.983 131.471   1
   1   0  -7-5.57022 60.8153   5
   1   0  -6 2726.98 146.751   5
  -1   0   6 2612.22 216.329   3
   1   0  -6 2442.44 208.161   1
  -1   0   6 2323.00 239.541   1
  -1   0   5 121.537 113.152   1
   1   0  -5-33.8652 83.4876   1
  -1   0   5-62.2577 89.0101   3
   1   0  -4 1477.43 143.589   1
  -1   0   4 1684.29 167.793   1
  -1   0   4 1547.75 153.474   3
  -1   0   3-17.1140 77.0667   3
  -1   0   3-75.0554 73.7687   1
  -1   0  -2 1203.70 114.341   1
   1   0   2 1193.10 119.971   1
  -1   0  -2 1283.48 110.130   5
  -1   0  -3 97.8565 77.3774   5
  -1   0  -3 80.8128 76.7094   1
   1   0   3 121.879 97.5199   1
  -1   0  -4 20746.3 510.640   5
  -1   0  -4 20098.1 568.625   1
   1   0   4 20115.3 597.410   1
   1   0   5 45.1730 129.763   1
  -1   0  -5-165.685 108.662   1
  -1   0  -5 18.8711 73.1668   5
  -1   0  -6 21782.0 577.761   5
   1   0   6 21503.8 725.859   1
  -1   0  -7 15.2217 77.1986   5
   1   0   7 53.5905 146.454   1
   1   0   8 6070.92 441.329   1
  -1   0  -8 6354.47 314.230   5
   1   0   9 7.13311 161.380   1
  -1   0  -9-20.5812 92.1006   5
   1   0  10 1952.97 298.902   1
   1   0  11 46.6580 206.591   1
   1   0  12 28252.0 1189.46   1
   1   0  13 182.505 225.156   1
   1   0  14 195.897 228.350   1
   1   0  15 16.8796 227.323   1
   1   0  16 1768.87 408.566   1
   1   0  17 14.3851 265.837   1
  -1  -1  18 956.769 375.146   1
  -1   1  18 2247.85 445.718   1
  -1  -1  17 705.900 298.396   1
  -1   1  17 382.738 269.450   1
  -1  -1  16 2869.31 450.763   1
  -1   1  16 3964.18 511.919   1
  -1  -1  15 567.567 234.428   1
  -1   1  15 527.500 269.546   1
  -1   1  14 4811.71 512.875   1
  -1  -1  14 5155.95 517.063   1
  -1  -1  13 2334.83 357.078   1
  -1   1  13 2449.38 373.869   1
  -1  -1  12 6100.54 515.784   1
  -1   1  12 5356.85 497.957   1
   1  -1 -11 1666.58 142.926   5
  -1  -1  11 1319.71 268.605   1
  -1   1  11 1617.13 296.461   1
   1   1 -11 1852.35 167.207   5
  -1   1  10 14083.7 694.319   1
   1   1 -10 13543.9 440.631   5
   1  -1 -10 14125.5 410.142   5
  -1  -1  10 13886.0 680.439   1
   1  -1  -9 7860.15 283.159   5
  -1  -1   9 7624.24 476.233   1
  -1   1   9 7802.57 485.178   1
   1   1  -9 7824.99 312.801   5
   1  -1  -8 8607.94 286.530   5
  -1   1   8 8545.50 483.039   1
  -1  -1   8 8510.28 473.257   1
  -1  -1   7 3503.26 297.125   1
  -1   1   7 3918.84 336.378   1
   1  -1  -7 3636.19 173.189   5
  -1  -1   6 92667.8 1616.60   3
  -1  -1   6 88038.1 1639.18   1
  -1   1   6 91146.1 1614.04   3
  -1   1   6 90195.8 1678.87   1
   1   1  -6 91246.7 1600.75   1
   1  -1  -6 87999.8 1310.78   5
  -1   1   5 11526.5 416.554   3
  -1  -1   5 10916.9 416.968   1
   1   1  -5 11584.9 404.973   1
   1  -1  -5 11127.8 260.237   5
  -1   1   5 11652.8 445.191   1
  -1   1   4 2204.41 194.400   3
   1  -1  -4 3114.85 212.739   3
  -1   1   4 2625.74 221.872   1
  -1  -1   3 3026.39 161.229   1
  -1   1   3 2952.80 168.820   3
   1   1  -3 2834.03 161.624   1
   1  -1  -3 3087.25 182.569   3
  -1  -1  -2 134589. 1958.37   1
  -1  -1  -2 135509. 1916.01   5
  -1   1  -2 139040. 1984.92   1
   1   1   2 132701. 1933.81   5
   1  -1   2 139633. 1998.21   1
   1   1   2 138027. 1904.76   3
   1   1   3 44830.0 907.618   1
  -1  -1  -3 46381.5 893.843   1
  -1  -1  -3 46214.5 825.109   5
   1  -1   3 48022.7 931.880   1
   1   1   3 46208.2 846.574   3
   1   1   3 46126.6 840.724   5
  -1   1  -3 47010.2 903.939   1
   1  -1   4 95857.1 1694.94   1
   1   1   4 97231.4 1671.88   1
  -1   1  -4 99280.2 1645.80   1
  -1  -1  -4 97723.5 1640.74   1
  -1   1  -5 19587.7 593.824   1
   1  -1   5 18525.0 635.682   1
  -1  -1  -5 18812.2 582.034   1
  -1  -1  -5 19075.5 501.778   5
   1   1   5 19239.2 559.880   3
   1   1   5 19118.2 624.898   1
  -1   1  -5 19030.3 518.059   5
  -1  -1  -6 30570.4 703.217   5
  -1   1  -6 31572.5 732.567   5
   1  -1   6 30221.7 893.350   1
   1   1   6 29573.2 886.126   1
  -1  -1  -7 8205.44 339.135   5
   1   1   7 7786.00 458.761   1
  -1   1  -7 7684.57 344.719   5
   1  -1   7 7954.68 478.701   1
   1   1   8 13844.3 664.583   1
  -1  -1  -8 15270.1 491.098   5
  -1   1  -8 15389.6 510.860   5
   1  -1   8 14325.0 670.201   1
  -1   1  -9 11960.3 458.588   5
  -1  -1  -9 11533.7 429.603   5
   1  -1   9 11280.0 624.686   1
   1   1   9 11388.6 630.134   1
   1   1  10 36898.5 1254.19   1
  -1  -1 -10 37567.5 877.433   5
   1  -1  10 38102.4 1252.47   1
   1  -1  11 3004.85 391.426   1
   1   1  11 2884.75 381.689   1
   1   1  12 5000.63 511.832   1
   1  -1  12 6152.99 547.550   1
   1   1  13 471.200 256.885   1
   1  -1  13 901.896 304.011   1
   1   1  14 2985.79 448.200   1
   1  -1  14 3388.47 447.574   1
   1   1  15-66.8561 258.600   1
   1  -1  15 159.691 249.629   1
   1   1  16 4739.05 590.449   1
   1  -1  16 3440.33 507.124   1
   1   1  17 307.310 274.301   1
   1  -1  17-89.8165 291.128   1
  -1   2  18 1080.37 353.469   1
  -1  -2  18 528.017 279.872   1
  -1  -2  17 2356.74 425.198   1
  -1   2  17 2478.58 459.988   1
  -1   2  16 3754.59 509.432   1
  -1  -2  16 3236.13 461.925   1
  -1   2  15 2013.00 396.411   1
  -1  -2  15 1716.25 352.102   1
  -1  -2  14 514.305 262.906   1
  -1   2  14 587.772 271.754   1
  -1   2  13 3458.25 427.861   1
  -1  -2  13 4357.14 463.625   1
  -1  -2  12 6999.83 562.710   1
  -1   2  12 7868.75 571.866   1
   1   2 -11 24876.0 634.493   5
   1  -2 -11 23038.3 523.284   5
  -1   2  11 23580.9 955.952   1
  -1  -2  11 23727.5 941.644   1
  -1  -2  10 279.178 45.2974   4
  -1  -2  10 549.785 217.519   1
   1   2 -10 272.832 90.8592   5
  -1   2  10 365.648 177.937   1
   1  -2 -10 372.432 76.2324   5
  -1  -2   9 1503.77 242.655   1
  -1   2   9 2299.97 301.025   1
   1  -2  -9 1836.00 129.578   5
   1  -2  -8 1259.83 106.247   5
  -1  -2   8 958.646 190.268   1
  -1   2   8 775.064 190.599   1
  -1  -2   7 13916.8 557.192   1
   1  -2  -7 13611.2 334.285   5
  -1   2   7 13073.7 571.966   1
  -1  -2   6 32130.7 825.022   1
  -1   2   6 32156.7 796.978   3
   1  -2  -6 29635.3 543.256   5
  -1   2   6 30346.6 833.500   1
   1  -2  -6 30286.5 833.736   3
   1   2  -6 32577.1 785.820   1
  -1   2   5 5713.76 317.304   1
  -1  -2   5 6580.81 310.844   1
  -1   2   5 6141.64 300.250   3
   1   2  -5 6787.88 303.620   1
   1  -2  -5 5594.87 311.669   3
   1  -2  -5 5363.81 165.265   5
  -1  -2   4 8604.00 315.047   1
   1   2  -4 8713.61 310.479   1
   1  -2  -4 7578.99 330.693   3
  -1   2   4 8270.08 320.549   3
  -1  -2   3 77998.0 1231.21   1
   1  -2  -3 79229.0 1303.62   3
  -1   2   3 82299.9 1293.27   3
  -1  -2  -2 57465.4 941.400   3
  -1  -2  -2 58158.8 951.859   5
  -1   2  -2 58353.7 891.028   4
   1   2   2 58822.9 998.775   1
   1   2   2 58542.7 965.277   5
   1   2   2 59775.0 938.876   3
  -1  -2  -2 58113.8 987.215   1
   1  -2   2 60415.8 1043.70   1
  -1   2  -2 60199.8 1024.02   1
   1  -2   2 59386.3 890.179   4
  -1  -2  -3 1991.84 155.188   3
   1  -2   3 2085.87 113.222   4
   1   2   3 2209.81 151.761   3
   1  -2   3 1932.77 195.072   1
  -1  -2  -3 2106.57 140.515   5
   1   2   3 2133.85 184.681   1
   1   2   3 1761.43 152.407   5
  -1   2  -3 2024.50 169.951   1
  -1  -2  -3 1835.60 158.499   1
   1  -2   4 331.716 131.666   1
  -1   2  -4 236.292 102.256   1
   1   2   4 159.197 91.8359   5
  -1  -2  -4 281.985 110.564   1
  -1  -2  -4 152.313 73.0728   5
   1   2   4 257.273 104.490   3
   1   2   4 179.567 120.786   1
   1  -2   4 219.646 62.7435   4
  -1  -2  -5 39417.8 791.413   5
   1   2   5 38739.6 958.873   1
   1   2   5 38844.0 823.891   5
   1  -2   5 41052.5 981.149   1
  -1   2  -5 41428.1 936.063   1
   1   2   5 39564.1 880.839   3
  -1  -2  -5 39164.5 915.355   1
   1   2   6 13326.1 495.662   3
   1  -2   6 14632.0 585.842   1
  -1  -2  -6 13310.5 425.381   5
   1   2   6 13186.2 569.857   1
  -1  -2  -7 1447.81 152.655   5
   1  -2   7 1475.96 250.243   1
   1   2   7 1372.07 240.743   1
  -1   2  -8 5819.55 317.160   5
  -1  -2  -8 5789.63 288.261   5
   1  -2   8 5276.37 410.778   1
   1   2   8 5320.70 410.731   1
   1   2   9 12482.4 663.500   1
  -1  -2  -9 12961.5 450.605   5
   1  -2   9 12935.8 668.579   1
  -1  -2 -10 23627.3 649.438   5
   1  -2  10 23189.1 565.088   4
   1   2  10 23745.4 968.176   1
   1  -2  10 24510.0 983.177   1
   1  -2  11-3.01106 73.5326   4
   1  -2  11 342.717 225.214   1
   1   2  11 154.155 209.548   1
   1   2  12 1559.70 320.062   1
   1  -2  12 2579.60 372.433   1
   1   2  13 312.352 219.675   1
   1  -2  13 85.9707 219.785   1
   1   2  14 317.813 247.997   1
   1  -2  14 178.957 221.046   1
   1  -2  15 1819.43 402.823   1
   1   2  15 1485.90 340.069   1
   1  -2  16 561.917 296.688   1
   1   2  16 1057.07 348.149   1
   1   2  17 599.847 305.390   1
   1  -2  17 638.454 317.164   1
  -1   3  18-128.904 243.249   1
  -1  -3  18 1.47566 260.901   1
  -1  -3  17 871.812 320.012   1
  -1   3  17 1056.99 351.280   1
  -1   3  16 170.177 244.642   1
  -1  -3  16 117.949 222.514   1
  -1   3  15 2448.63 412.869   1
  -1  -3  15 2393.52 422.317   1
  -1   3  14 1253.93 316.118   1
  -1  -3  14 593.022 277.757   1
  -1   3  13 18491.1 921.778   1
  -1  -3  13 17328.4 902.172   1
  -1   3  12 199.951 199.489   1
  -1  -3  12 299.882 229.538   1
  -1   3  11 14004.0 733.017   1
  -1  -3  11 13382.3 715.636   1
   1  -3 -11 13075.1 373.448   5
  -1   3  10 8289.87 555.152   1
   1  -3 -10 7367.85 263.793   5
  -1  -3  10 7850.55 514.770   1
   1  -3  -9 13196.2 357.651   5
  -1   3   9 14108.5 682.354   1
  -1  -3   9 13582.0 641.809   1
  -1  -3   8 1407.14 228.534   1
  -1   3   8 1346.91 239.480   1
   1  -3  -8 1330.52 108.890   5
  -1  -3   7 109678. 1941.26   1
  -1   3   7 104222. 1965.32   1
   1  -3  -7 103278. 1911.53   3
   1  -3  -7 100639. 1486.80   5
   1   3  -6 305.564 110.060   1
  -1   3   6 151.362 138.399   1
  -1  -3   6 321.077 138.167   1
  -1   3   6 241.166 104.263   3
   1  -3  -6 180.855 139.063   3
   1  -3  -6 213.236 53.4335   5
  -1   3   6 343.271 67.6071   5
  -1  -3   5 16060.5 502.263   1
   1   3  -5 15248.1 469.251   1
   1  -3  -5 13947.9 310.133   5
  -1   3   5 14705.2 327.650   5
  -1   3   5 15191.6 533.494   1
  -1   3   5 15630.0 496.631   3
   1  -3  -5 14740.5 518.485   3
  -1   3   4 5387.34 165.791   5
  -1   3   4 5686.17 271.291   3
   1  -3  -4 4843.86 159.137   5
  -1  -3   4 5868.02 268.982   1
   1  -3  -4 5287.56 277.298   3
   1   3  -4 5559.97 250.322   1
  -1   3   3 60059.9 907.961   5
   1   3  -3 63527.3 1017.81   1
   1  -3  -3 62420.7 1088.86   3
  -1  -3   3 63577.9 1035.83   1
  -1  -3   2 35515.3 606.769   1
   1  -3  -2 34611.6 674.122   6
  -1   3   2 35797.3 671.891   6
   1   3  -2 36550.2 604.669   1
  -1  -3   1 147233. 2049.74   2
   1   3  -1 149494. 2044.51   2
   1  -3   1 34490.5 681.177   1
  -1   3  -1 33904.9 601.796   4
  -1  -3  -1 34617.6 645.314   5
   1   3   1 34903.0 648.701   5
  -1   3  -2 8513.32 236.483   4
   1   3   2 8362.44 282.769   5
   1  -3   2 8237.87 322.075   1
  -1   3  -2 8671.10 309.411   1
   1  -3   2 8070.68 231.795   4
   1   3   2 8682.26 265.684   3
  -1  -3  -2 8255.69 268.381   5
  -1  -3  -2 8160.26 263.782   3
   1   3   2 8145.12 289.619   1
  -1  -3  -3 157498. 2227.64   5
   1   3   3 155569. 2347.16   1
  -1   3  -3 159183. 2352.63   1
   1   3   3 159579. 2259.80   3
   1  -3   3 158194. 2386.97   1
   1  -3   3 150842. 2126.34   4
  -1  -3  -3 153092. 2268.23   3
  -1   3  -3 158352. 2122.96   4
   1   3   3 154550. 2255.90   5
   1   3   4 27267.3 649.195   3
  -1  -3  -4 26353.9 661.183   3
   1   3   4 26276.9 624.051   5
   1   3   4 27591.8 723.552   1
   1  -3   4 27523.9 508.657   4
   1  -3   4 27210.6 739.455   1
  -1  -3  -4 26776.8 596.324   5
  -1   3  -4 28101.8 707.112   1
   1   3   5 70937.9 1438.51   1
  -1   3  -5 72588.6 1398.32   1
   1  -3   5 71868.4 1102.57   4
   1   3   5 74404.1 1338.59   3
  -1  -3  -5 72754.0 1230.41   5
   1   3   5 69998.3 1279.65   5
   1  -3   5 73966.0 1474.52   1
   1  -3   6 3776.37 168.469   4
  -1  -3  -6 3889.64 222.002   5
   1  -3   6 3530.90 311.509   1
   1   3   6 3342.45 288.812   1
   1   3   6 3447.47 232.775   5
  -1  -3  -7 23665.8 598.950   5
   1   3   7 23458.1 820.652   1
   1  -3   7 22158.1 487.094   4
   1  -3   7 24984.9 836.583   1
   1  -3   8 1678.89 277.610   1
   1  -3   8 1248.08 109.655   4
  -1  -3  -8 1393.70 146.040   5
   1   3   8 1362.32 243.362   1
  -1  -3  -9 21367.8 591.562   5
   1  -3   9 20148.3 475.918   4
   1  -3   9 22365.0 893.342   1
   1   3   9 23327.0 898.103   1
   1  -3  10 3671.94 186.565   4
  -1  -3 -10 3830.82 243.110   5
   1   3  10 3470.90 377.910   1
   1  -3  10 5117.93 464.158   1
   1  -3  11 32875.2 651.779   4
   1   3  11 40298.4 1325.14   1
   1  -3  11 38539.9 1307.35   1
   1  -3  12 950.509 288.576   1
   1   3  12 384.022 218.952   1
   1  -3  13 4837.24 508.638   1
   1   3  13 4061.30 491.943   1
   1   3  14 1527.42 368.611   1
   1  -3  14 1450.40 352.015   1
   1   3  15 2874.63 446.258   1
   1  -3  15 2361.18 426.891   1
   1   3  16 480.434 299.320   1
   1  -3  16 212.782 249.585   1
   1   3  17 3050.78 488.277   1
   1  -3  17 2841.34 500.768   1
  -1   4  18 1525.57 386.244   1
  -1  -4  18 750.977 330.859   1
  -1   4  17 1815.40 394.890   1
  -1  -4  17 2774.32 469.313   1
  -1   4  16-39.5169 233.819   1
  -1  -4  16 346.347 272.693   1
  -1  -4  15 3805.11 481.786   1
  -1   4  15 3212.74 469.358   1
  -1  -4  14 1001.72 295.910   1
  -1   4  14 862.033 315.228   1
  -1   4  13 5922.30 540.040   1
  -1  -4  13 5049.96 513.454   1
  -1   4  12 616.978 230.281   1
  -1  -4  12 488.854 193.151   1
  -1   4  11-14.4251 168.760   1
   1  -4 -11-11.6860 56.7514   5
  -1  -4  11-146.260 182.569   1
   1  -4 -10 500.347 78.4636   5
  -1  -4  10 340.357 162.261   1
  -1   4  10 539.543 209.822   1
  -1  -4   9 8065.39 496.029   1
  -1   4   9 8217.52 524.457   1
   1  -4  -9 7897.42 265.427   5
  -1  -4   8 11371.5 548.482   1
   1  -4  -8 11554.0 557.074   3
  -1   4   8 10867.0 571.701   1
   1  -4  -8 11233.7 314.804   5
  -1   4   7 31430.0 951.673   1
  -1  -4   7 33246.8 920.563   1
   1  -4  -7 33237.7 939.957   3
   1  -4  -7 32134.3 606.689   5
  -1   4   7 32908.4 639.643   5
   1  -4  -6 3381.17 285.424   3
   1   4  -6 4167.29 265.510   1
  -1  -4   6 3983.34 285.390   1
  -1   4   6 3935.63 176.077   5
   1  -4  -6 3366.76 155.255   5
  -1   4   6 3469.47 291.410   1
   1  -4  -5 50366.7 840.716   5
   1   4  -5 53224.5 1035.53   1
  -1   4   5 53168.9 859.948   5
  -1  -4   5 54597.3 1095.48   1
  -1   4   5 56005.6 1095.88   3
   1  -4  -5 52167.2 1109.55   3
   1   4  -4 3790.92 211.573   1
  -1   4   4 3990.77 234.645   6
  -1  -4   4 3851.37 222.111   1
  -1   4   4 3886.81 163.342   5
   1  -4  -4 3746.42 246.795   3
   1   4  -3 630.192 93.5818   1
  -1  -4   3 718.920 100.751   1
  -1   4   3 600.972 109.585   6
  -1   4   3 605.034 80.9681   5
   1  -4  -2 20248.7 492.144   6
  -1  -4   2 21085.2 435.623   1
   1   4  -2 20548.6 426.891   1
  -1  -4   2 18734.5 467.736   2
  -1   4   2 21193.2 489.541   6
   1   4  -1 58896.1 971.097   2
  -1  -4   1 61402.0 979.208   2
   1   4   0 14545.3 376.286   2
   1   4   0 15770.1 417.647   5
   1  -4   0 16250.2 284.888   2
  -1  -4   0 16283.4 295.192   6
  -1   4  -1 94778.4 1406.71   4
   1   4   1 92578.7 1347.79   6
   1   4   1 94272.7 1469.35   5
  -1  -4  -1 94417.4 1455.61   5
   1  -4   1 94036.5 1496.71   1
  -1   4  -1 98200.1 1496.96   1
  -1  -4  -2 8229.94 287.012   5
   1   4   2 8581.06 317.117   5
   1  -4   2 8385.76 329.962   1
  -1   4  -2 7785.51 243.826   4
  -1  -4  -2 7879.34 281.840   3
  -1   4  -2 8083.30 311.308   1
  -1   4  -3 6619.02 309.908   1
   1  -4   3 6881.50 329.799   1
  -1  -4  -3 6847.43 281.133   3
   1   4   3 6711.73 280.116   5
  -1  -4  -3 7154.25 270.297   5
  -1   4  -3 6747.62 217.991   4
   1  -4   3 6475.35 218.578   4
   1   4   3 6743.38 313.931   1
   1   4   4 12.0162 85.7442   5
   1   4   4 112.914 80.3609   3
   1   4   4 134.884 113.142   1
   1  -4   4 91.0358 110.729   1
   1  -4   4-31.2194 58.2319   4
  -1   4  -4 79.1484 90.4856   1
  -1  -4  -4-4.25537 97.4459   3
  -1   4  -4 114.049 57.4646   4
  -1  -4  -4 137.048 74.0258   5
   1  -4   5 9378.06 450.639   1
   1   4   5 9860.28 392.292   3
   1  -4   5 8801.51 252.393   4
  -1  -4  -5 9579.08 336.026   5
  -1  -4  -5 8609.65 390.306   3
   1   4   5 8856.59 354.931   5
   1   4   5 8751.30 430.307   1
  -1   4  -5 8307.89 400.095   1
   1  -4   6 5746.67 200.232   4
  -1  -4  -6 6473.08 285.705   5
   1  -4   6 7078.05 436.584   1
   1   4   6 6399.81 313.935   5
   1   4   6 5989.90 393.838   1
   1  -4   7 29284.3 574.830   4
   1  -4   7 33974.2 1017.77   1
   1   4   7 33773.5 808.214   5
   1   4   7 34465.4 1009.78   1
  -1  -4  -7 34220.9 749.142   5
   1  -4   8 551.032 86.2493   4
  -1  -4  -8 237.775 87.0468   5
   1  -4   8 736.792 278.824   1
   1   4   8-51.1957 195.518   1
   1  -4   9 2706.38 134.099   4
   1  -4   9 2801.26 343.366   1
   1   4   9 3083.47 342.423   1
  -1  -4  -9 2859.80 201.919   5
  -1  -4 -10 1922.75 174.535   5
   1  -4  10 1499.20 97.3284   4
   1  -4  10 1919.13 325.260   1
   1   4  10 1492.73 268.014   1
   1   4  11 8762.78 623.717   1
   1  -4  11 10333.9 669.267   1
   1  -4  12 295.109 221.196   1
   1   4  12 378.980 236.764   1
   1   4  13 4206.80 486.850   1
   1  -4  13 4331.66 486.816   1
   1  -4  14-37.6329 235.889   1
   1   4  14 554.101 268.534   1
   1   4  15-256.982 253.262   1
   1  -4  15-2.03224 232.500   1
   1   4  16 226.890 268.039   1
   1  -4  16-47.0689 236.244   1
   1  -4  17 1197.37 372.939   1
   1   4  17 1375.93 399.631   1
  -1  -5  18 4134.82 554.417   1
  -1  -5  17 1194.97 343.351   1
  -1   5  17 974.157 349.685   1
  -1   5  16 2397.19 417.741   1
  -1  -5  16 1594.24 365.348   1
  -1  -5  15 1421.59 346.384   1
  -1   5  15 1509.83 357.680   1
  -1  -5  14 11448.4 778.116   1
  -1   5  14 12180.6 800.744   1
  -1   5  13 3809.93 443.844   1
  -1  -5  13 3964.52 454.150   1
  -1   5  12 209.799 210.101   1
  -1  -5  12 198.465 172.857   1
   1  -5 -11 647.874 89.8304   5
  -1   5  11 723.479 222.686   1
  -1  -5  11 980.147 241.018   1
   1  -5 -10 6292.76 242.560   5
  -1   5  10 7042.98 512.373   1
  -1  -5  10 7117.80 508.265   1
  -1   5   9 612.033 214.942   1
  -1  -5   9 534.018 198.102   1
   1  -5  -9 581.592 184.809   3
   1  -5  -9 502.537 76.6352   5
   1  -5  -8 7167.42 445.279   3
   1  -5  -8 6943.73 248.431   5
  -1   5   8 7132.45 274.816   5
  -1  -5   8 7398.44 434.140   1
  -1   5   8 7124.27 469.518   1
   1  -5  -7 1451.75 115.056   5
  -1   5   7 1768.90 135.107   5
  -1  -5   7 1498.98 217.564   1
   1  -5  -7 1750.69 227.627   3
  -1   5   7 1321.68 220.646   1
   1  -5  -6 33547.7 904.316   3
  -1  -5   6 34446.9 878.881   1
  -1   5   6 33963.2 663.902   5
   1   5  -6 34631.1 821.736   1
   1  -5  -6 32347.7 628.943   5
  -1   5   5 37869.2 867.835   6
   1   5  -5 37158.2 826.195   1
  -1   5   5 36138.7 694.191   5
   1  -5  -5 36003.1 895.194   3
  -1  -5   5 38182.1 860.970   1
   1   5  -4 125602. 1901.63   1
   1  -5  -4 119975. 2008.08   3
  -1   5   4 119721. 1789.68   5
  -1  -5   4 126988. 1941.34   1
  -1   5   4 124730. 1962.25   6
  -1   5   3 20145.6 532.488   6
  -1  -5   3 20520.9 502.936   1
   1   5  -3 20661.4 486.972   1
  -1   5   3 19885.4 466.828   5
   1   5  -2 201279. 2738.08   1
  -1  -5   2 201908. 2753.98   1
   1  -5  -2 197077. 2836.07   6
  -1  -5   2 200142. 2806.38   2
  -1  -5   1 85361.1 1316.87   2
   1   5  -1 82077.3 1303.44   2
  -1   5   1 84430.1 1163.31   2
  -1  -5   0 2029.46 103.858   6
   1   5   0 1909.44 166.023   5
   1  -5   0 1940.48 96.4777   2
   1   5   0 1986.97 139.036   2
   1   5   1 52445.5 838.374   6
  -1   5  -1 52106.2 975.789   1
   1   5   1 51901.6 977.372   5
  -1  -5  -2 125901. 1914.61   5
   1   5   2 123537. 1938.91   5
  -1   5  -2 129830. 1846.10   4
  -1   5  -2 127551. 1973.06   1
  -1   5  -3 58952.3 961.578   4
  -1  -5  -3 56195.9 1069.99   3
  -1   5  -3 59610.0 1130.49   1
   1  -5   3 58237.0 1176.70   1
   1   5   3 58023.2 1082.15   5
  -1  -5  -3 59270.8 1057.12   5
   1  -5   4 26522.5 752.443   1
  -1  -5  -4 26532.2 679.823   3
  -1   5  -4 26623.1 527.021   4
  -1  -5  -4 26347.3 620.956   5
   1   5   4 26525.7 731.813   1
   1   5   4 26090.3 649.227   5
  -1   5  -4 25824.6 709.283   1
  -1  -5  -5 97251.9 1591.35   5
   1  -5   5 97420.0 1849.62   1
  -1  -5  -5 96512.5 1727.01   3
   1   5   5 97658.5 1819.78   1
   1   5   5 100744. 1696.43   3
   1  -5   6 20967.8 738.672   1
   1   5   6 20613.9 596.150   5
  -1  -5  -6 20965.2 670.758   3
  -1  -5  -6 20863.4 547.330   5
   1  -5   6 18294.9 403.851   4
   1   5   6 20438.4 728.039   1
   1   5   7 1110.64 218.027   1
   1  -5   7 1173.92 220.173   1
  -1  -5  -7 1029.62 128.206   5
   1   5   7 1104.47 164.351   5
   1  -5   7 844.370 77.6177   4
   1   5   8 26288.7 937.524   1
   1   5   8 25267.8 710.351   5
  -1  -5  -8 26729.8 647.994   5
   1  -5   8 28139.2 954.308   1
  -1  -5  -9 891.696 126.624   5
   1   5   9 688.635 204.972   1
   1  -5   9 883.399 283.713   1
  -1  -5 -10 1365.12 152.510   5
   1  -5  10 1552.47 269.945   1
   1   5  10 1328.16 268.735   1
   1  -5  11 4598.95 465.107   1
   1   5  11 4191.55 457.563   1
   1   5  12 9431.87 681.577   1
   1  -5  12 8968.39 659.442   1
   1  -5  13 765.943 296.163   1
   1   5  13 1006.91 314.881   1
   1  -5  14 3422.97 467.165   1
   1   5  14 2279.73 415.295   1
   1  -5  15 2189.65 410.490   1
   1   5  15 2553.49 437.186   1
   1   5  16 1933.18 393.529   1
   1  -5  16 2385.93 446.456   1
   1  -5  17 2804.46 482.339   1
   1   5  17 1837.22 394.228   1
  -1  -6  18 1375.05 361.539   1
  -1  -6  17-101.351 255.148   1
  -1   6  17-268.867 281.626   1
  -1  -6  16 2670.41 431.941   1
  -1   6  16 2861.40 473.404   1
  -1   6  15 217.271 221.254   1
  -1  -6  15 66.3746 208.426   1
  -1  -6  14 3977.54 454.929   1
  -1   6  14 3373.24 455.697   1
  -1   6  13 232.053 207.383   1
  -1  -6  13-174.487 229.112   1
  -1   6  12 16371.3 866.505   1
  -1  -6  12 15255.6 794.226   1
  -1   6  11 11518.6 704.096   1
  -1  -6  11 12445.9 679.543   1
   1  -6 -11 10268.9 324.697   5
   1  -6 -10 513.408 202.368   3
   1  -6 -10 801.249 98.0482   5
  -1  -6  10 597.470 195.641   1
  -1   6  10 375.412 180.449   1
   1  -6  -9-26.4598 154.230   3
   1  -6  -9 90.8640 58.5957   5
  -1   6   9-62.5626 152.176   1
  -1   6   9 161.564 77.3402   5
  -1  -6   9 12.3313 163.458   1
   1  -6  -8 16799.7 431.151   5
   1  -6  -8 17839.7 709.209   3
  -1  -6   8 17105.1 683.071   1
  -1   6   8 17797.5 742.432   1
  -1   6   8 17552.2 473.292   5
  -1  -6   7 378.248 135.861   1
  -1   6   7 504.438 98.7207   5
   1  -6  -7 284.135 142.927   3
  -1   6   7 258.115 157.689   1
  -1   6   6 80921.0 1318.44   5
  -1  -6   6 79701.9 1553.77   1
   1   6  -6 79472.5 1477.25   1
   1  -6  -6 80198.7 1607.72   3
   1  -6  -5 11585.5 486.796   3
  -1  -6   5 11903.0 458.837   1
   1   6  -5 11915.9 429.712   1
  -1   6   5 11308.4 452.187   6
  -1   6   5 11930.2 366.225   5
  -1   6   4 1164.39 128.874   5
  -1  -6   4 1094.13 152.983   1
   1  -6  -4 1336.39 174.435   3
   1   6  -4 1119.57 132.443   1
  -1   6   4 1280.84 162.604   6
   1  -6  -3 5803.94 300.724   6
  -1  -6   3 5657.90 285.706   2
   1   6  -3 5995.19 257.074   1
  -1   6   3 6456.37 288.217   6
  -1  -6   3 6284.79 275.588   1
  -1  -6   2 1223.71 148.098   2
   1   6  -2 1280.83 122.771   1
   1  -6  -2 1461.89 155.635   6
   1   6  -1 51063.5 904.196   2
  -1  -6   1 49297.2 913.844   2
  -1   6   1 50068.9 770.534   2
  -1  -6   0 34777.6 607.883   6
   1   6   0 35752.6 786.095   5
   1   6   0 34593.7 691.032   2
   1  -6   0 35497.4 591.311   2
   1   6   1 67116.8 1064.53   6
   1   6   1 67623.8 1229.17   5
  -1   6  -1 68902.3 1220.11   1
  -1  -6  -2 9555.16 351.184   5
   1   6   2 9400.99 305.387   6
  -1   6  -2 9249.72 311.139   4
   1   6   2 8814.97 360.001   5
  -1   6  -2 8814.99 363.726   1
   1  -6   2 9548.30 388.297   1
  -1   6  -3 2400.32 197.520   1
   1  -6   3 2259.84 218.394   1
   1   6   3 2180.96 187.167   5
  -1  -6  -3 2149.08 182.620   3
  -1  -6  -3 2134.75 172.677   5
  -1   6  -3 2416.07 154.225   4
  -1  -6  -4 123964. 2082.58   3
   1  -6   4 132547. 2224.44   1
   1   6   4 128418. 2174.65   1
  -1   6  -4 130435. 1884.29   4
  -1  -6  -4 131612. 2018.29   5
   1   6   4 131062. 2075.29   5
  -1   6  -4 130467. 2142.02   1
   1   6   5 15360.4 603.566   1
  -1  -6  -5 16100.3 565.708   3
   1   6   5 15982.9 520.181   5
  -1  -6  -5 15927.7 483.552   5
   1  -6   5 16970.8 635.121   1
  -1   6  -5 17087.8 397.367   4
  -1  -6  -6 4652.59 325.371   3
   1  -6   6 4775.60 373.918   1
   1   6   6 4740.56 366.386   1
  -1  -6  -6 4908.11 261.026   5
   1   6   6 4931.44 287.005   5
   1   6   7 150.515 96.9534   5
   1  -6   7 242.758 189.118   1
  -1  -6  -7 78.0077 70.4782   5
  -1  -6  -7 119.130 126.895   3
   1   6   7-7.06339 152.356   1
   1   6   8 7373.41 501.061   1
   1  -6   8 8956.33 531.192   1
  -1  -6  -8 8799.01 357.558   5
   1   6   8 7949.27 395.359   5
  -1  -6  -9-108.007 102.054   5
   1   6   9-25.7425 110.065   5
   1  -6   9-46.8151 202.633   1
   1   6   9-135.982 200.131   1
  -1  -6 -10 4937.24 277.106   5
   1   6  10 4594.92 453.644   1
   1  -6  10 5207.08 457.245   1
   1  -6  11 2871.84 367.886   1
   1   6  11 2365.63 364.906   1
   1  -6  12 1303.10 320.565   1
   1   6  12 1269.18 313.825   1
   1  -6  13 382.873 245.360   1
   1   6  13 135.454 222.261   1
   1   6  14 1226.55 350.714   1
   1  -6  14 589.688 233.851   1
   1  -6  15 150.421 247.126   1
   1   6  15 123.795 237.378   1
   1   6  16-51.2210 263.623   1
   1  -6  16-492.742 293.352   1
   1  -6  17-171.806 282.211   1
  -1  -7  18 1867.82 436.830   1
  -1   7  17-253.785 263.016   1
  -1  -7  17 616.179 330.482   1
  -1   7  16 2287.82 427.741   1
  -1  -7  16 2530.17 425.766   1
  -1   7  15 2714.60 445.346   1
  -1  -7  15 2701.26 411.225   1
  -1   7  14 9092.79 713.599   1
  -1  -7  14 9806.62 692.004   1
  -1  -7  13 100.840 217.180   1
  -1   7  13 209.497 204.094   1
  -1  -7  12 1105.58 261.497   1
  -1   7  12 868.721 267.257   1
  -1   7  11 1310.94 292.377   1
  -1  -7  11 1424.12 283.572   1
   1  -7 -10 1414.80 264.348   3
  -1   7  10 1218.89 137.125   5
  -1   7  10 1389.43 296.532   1
  -1  -7  10 1168.91 229.288   1
  -1  -7   9 4086.92 356.031   1
  -1   7   9 3503.83 356.128   1
   1  -7  -9 4228.72 371.872   3
  -1   7   9 3491.88 217.683   5
  -1   7   8 49477.2 973.198   5
  -1   7   8 51010.8 1350.78   1
  -1  -7   8 51147.3 1268.45   1
   1  -7  -8 48707.0 1293.23   3
   1  -7  -7 3191.58 298.352   3
  -1   7   7 2736.09 187.223   5
  -1  -7   7 2590.10 269.988   1
  -1  -7   6 37779.3 949.110   1
   1   7  -6 35021.5 848.099   1
  -1   7   6 37545.9 773.084   5
   1  -7  -6 37796.3 976.454   3
  -1   7   5 73799.5 1396.12   6
  -1  -7   5 70937.6 1399.85   1
  -1   7   5 72992.5 1269.32   5
   1  -7  -5 70908.6 1459.05   3
   1   7  -5 72439.6 1345.77   1
  -1  -7   4 52674.6 1067.03   1
  -1   7   4 51307.7 991.693   5
   1   7  -4 51644.2 1015.66   1
  -1   7   4 51492.6 1062.47   6
  -1  -7   3 10594.4 402.078   2
   1  -7  -3 10477.9 415.679   6
  -1  -7   3 10962.3 385.435   1
   1   7  -3 11588.0 378.293   1
   1  -7  -2 39465.8 845.807   6
  -1  -7   2 39805.1 823.472   2
   1   7  -2 40950.5 792.182   1
  -1   7   1 1195.58 92.7265   2
   1   7  -1 1219.77 131.128   2
  -1  -7   1 1102.02 143.911   2
   1   7   0 34300.4 701.982   2
   1   7   0 34342.2 816.169   5
   1  -7   0 33643.1 603.882   2
  -1  -7  -1 3344.53 178.939   6
   1  -7   1 3493.74 171.623   2
  -1   7  -1 3728.70 238.464   1
   1   7   1 3511.10 252.728   5
   1  -7   2 160089. 2510.78   1
   1   7   2 161871. 2312.17   6
   1   7   2 155589. 2468.75   5
  -1   7  -2 159650. 2466.74   1
  -1   7  -3-4.79290 94.8073   1
   1   7   3-46.5563 114.858   5
  -1  -7  -3 29.3533 87.9209   5
  -1   7  -3 51.6178 74.2084   4
   1   7   3-204.925 98.1561   6
   1  -7   3-18.1645 129.329   1
   1   7   4 31976.7 791.492   5
  -1  -7  -4 31299.8 805.162   3
  -1   7  -4 32779.5 837.234   1
   1  -7   4 32504.8 900.420   1
  -1   7  -4 32552.8 668.492   4
  -1  -7  -4 32657.7 758.231   5
  -1  -7  -5 2511.28 237.380   3
   1   7   5 2851.79 275.754   1
  -1   7  -5 2960.15 165.644   4
  -1  -7  -5 3072.65 215.409   5
   1  -7   5 3132.18 289.576   1
   1   7   5 2944.16 230.632   5
   1   7   6 37631.2 1060.19   1
  -1  -7  -6 36199.5 836.593   5
   1  -7   6 37719.5 1060.69   1
   1   7   6 37834.5 907.147   5
  -1   7  -6 37953.4 692.215   4
  -1  -7  -6 38245.9 995.187   3
   1  -7   7 8808.10 524.086   1
  -1  -7  -7 8777.49 363.387   5
   1   7   7 8003.62 500.912   1
   1   7   7 8372.87 401.986   5
  -1  -7  -7 7984.89 450.183   3
  -1  -7  -8 30265.6 956.011   3
   1  -7   8 29811.7 1030.52   1
   1   7   8 28196.9 1006.46   1
   1   7   8 29586.1 830.075   5
  -1  -7  -8 29849.3 732.128   5
  -1  -7  -9 598.150 115.523   5
   1   7   9 894.352 241.402   1
   1   7   9 555.735 139.679   5
   1  -7   9 409.260 199.322   1
   1  -7  10 5769.12 495.565   1
   1   7  10 5618.49 493.467   1
   1   7  10 5757.02 352.341   5
   1  -7  11 2858.41 372.058   1
   1   7  11 2786.32 378.779   1
   1   7  12 1602.49 328.948   1
   1  -7  12 2765.23 377.238   1
   1  -7  13-105.089 235.647   1
   1   7  13-73.3086 198.294   1
   1   7  14 8212.71 686.630   1
   1  -7  14 5793.83 584.546   1
   1   7  15 1395.06 376.779   1
   1  -7  15 1473.50 345.079   1
   1   7  16 2197.55 444.335   1
   1  -7  16 2110.73 418.764   1
   1  -7  17 449.252 310.207   1
  -1  -8  18 1900.49 407.647   1
  -1   8  17 1891.37 436.610   1
  -1  -8  17 2402.29 437.020   1
  -1   8  16 359.992 284.542   1
  -1  -8  16 314.196 246.570   1
  -1   8  15 1574.06 387.040   1
  -1  -8  15 1150.12 310.865   1
  -1   8  14 686.632 297.761   1
  -1  -8  14 561.135 253.814   1
  -1   8  13 5722.05 551.878   1
  -1  -8  13 5043.26 505.653   1
  -1  -8  12 2432.63 353.145   1
  -1   8  12 2929.03 384.437   1
  -1  -8  11 4333.34 425.200   1
   1  -8 -11 4172.63 415.911   3
  -1   8  11 4745.54 468.321   1
  -1   8  10 4580.40 261.995   5
   1  -8 -10 4876.33 419.034   3
  -1  -8  10 5486.76 446.784   1
  -1   8  10 4542.34 437.164   1
   1  -8  -9 12754.5 647.041   3
  -1   8   9 13640.9 697.483   1
  -1   8   9 12514.2 440.815   5
  -1  -8   9 11561.3 609.451   1
   1  -8  -8 9184.50 522.670   3
  -1   8   8 9413.58 555.545   1
  -1   8   8 8903.90 361.468   5
  -1  -8   8 9191.62 509.256   1
  -1  -8   7 10843.3 509.255   1
   1  -8  -7 11073.8 535.306   3
  -1   8   7 10870.4 396.101   5
   1   8  -6 27.7229 42.7231   4
   1  -8  -6 103.788 130.068   3
  -1   8   6 119.212 84.8879   5
  -1  -8   6 204.351 128.363   1
  -1  -8   5 3711.84 267.873   1
   1   8  -5 3834.78 251.578   1
   1  -8  -5 3795.21 309.994   3
  -1   8   5 4032.08 256.955   5
  -1   8   4 13915.4 486.902   6
  -1  -8   4 13683.2 487.513   1
   1   8  -4 13747.7 460.377   1
  -1  -8   4 13421.7 489.965   2
  -1   8   4 13851.1 468.849   5
  -1  -8   3 41759.5 927.506   2
   1   8  -3 44970.1 892.739   1
   1  -8  -3 43364.9 954.509   6
   1  -8  -2 2104.27 218.206   6
  -1  -8   2 1990.03 192.177   2
   1   8  -2 1746.67 160.392   1
  -1  -8   1 10947.0 396.768   2
   1   8  -1 10591.0 364.072   2
  -1   8   1 10619.6 287.825   2
   1   8   0 13574.3 418.477   2
   1  -8   0 14439.5 361.332   2
   1   8   0 14577.6 520.279   5
   1   8   1 48224.0 1064.82   5
  -1   8  -1 50191.0 1025.67   1
   1   8   1 45865.3 930.070   2
   1  -8   1 49540.1 860.513   2
  -1  -8  -1 46542.4 872.004   6
   1   8   2 3934.41 213.631   6
   1   8   2 4064.60 277.310   5
  -1   8  -2 3565.13 253.252   1
   1   8   3 37189.3 916.302   5
  -1   8  -3 38039.2 800.476   4
  -1   8  -3 38638.8 913.409   1
   1  -8   3 38697.7 960.404   1
   1   8   3 38922.8 822.126   6
   1   8   4 10069.3 432.720   5
  -1  -8  -4 9449.10 386.840   5
  -1   8  -4 10321.9 352.642   4
   1  -8   4 9977.67 474.564   1
  -1  -8  -4 9788.13 429.144   3
   1   8   4 9766.72 391.925   6
   1   8   5 3047.05 251.880   5
  -1   8  -5 2949.59 174.927   4
  -1  -8  -5 3041.96 261.823   3
  -1  -8  -5 2868.73 220.894   5
   1  -8   5 3110.96 304.126   1
   1  -8   6 23623.7 831.094   1
  -1  -8  -6 23338.0 747.960   3
   1   8   6 23084.2 702.184   5
  -1  -8  -6 23342.4 638.239   5
   1   8   6 23109.1 811.317   1
  -1   8  -6 23318.5 521.035   4
  -1  -8  -7 10204.8 401.357   5
   1   8   7 9213.76 437.328   5
   1  -8   7 9811.32 557.113   1
   1   8   7 10075.2 550.739   1
  -1  -8  -7 9631.92 492.619   3
   1  -8   8 1584.97 254.766   1
   1   8   8 1427.84 189.518   5
   1   8   8 1644.44 255.675   1
  -1  -8  -8 1426.29 158.731   5
  -1  -8  -8 1517.89 238.244   3
   1   8   9 7492.65 404.644   5
   1   8   9 7638.78 546.050   1
   1  -8   9 8000.49 556.156   1
  -1  -8  -9 7628.06 493.452   3
   1   8  10 1493.34 204.541   5
   1   8  10 1467.30 282.508   1
   1  -8  10 1313.66 269.145   1
   1  -8  11 2744.80 390.077   1
   1   8  11 2117.03 355.351   1
   1   8  11 1807.30 216.761   5
   1  -8  12 1267.37 327.806   1
   1   8  12 1346.49 306.359   1
   1   8  13 1849.10 388.158   1
   1  -8  13 1694.36 355.873   1
   1  -8  14 720.333 484.120   1
   1   8  14 930.642 311.978   1
   1  -8  15 360.810 234.659   1
   1   8  15 426.181 277.488   1
   1   8  16 74.3321 247.354   1
   1  -8  16-136.923 240.648   1
   1  -8  17 43.2568 262.854   1
  -1  -9  18 592.383 290.995   1
  -1   9  17 4478.06 584.809   1
  -1  -9  17 4489.72 533.185   1
  -1  -9  16 90.8338 245.450   1
  -1   9  16 123.579 261.262   1
  -1  -9  15 5017.61 546.131   1
  -1   9  15 6722.31 659.196   1
  -1  -9  14 9.34775 205.781   1
  -1   9  14 235.468 233.452   1
  -1  -9  13 5948.78 530.137   1
  -1   9  13 6004.80 570.281   1
   1  -9 -12 1971.19 316.943   3
  -1  -9  12 2171.08 340.043   1
  -1   9  12 2161.40 377.666   1
   1  -9 -11 4242.19 406.584   3
  -1   9  11 3578.02 239.962   5
  -1   9  11 3622.43 424.106   1
  -1  -9  11 4016.58 397.982   1
   1  -9 -10 2774.07 348.102   3
  -1   9  10 2565.53 344.163   1
  -1  -9  10 2794.86 343.351   1
  -1   9  10 2208.20 196.098   5
  -1  -9   9 23569.6 886.178   1
  -1   9   9 22688.0 641.702   5
  -1   9   9 24193.6 965.799   1
   1  -9  -9 25416.2 923.083   3
  -1   9   8 3522.90 245.041   5
  -1  -9   8 3957.49 341.352   1
   1  -9  -8 3956.95 351.960   3
   1   9  -7 29454.0 559.778   4
   1  -9  -7 31371.2 971.540   3
  -1   9   7 32722.0 785.427   5
  -1  -9   7 33524.6 956.294   1
  -1   9   6 628.773 122.207   5
   1  -9  -6 733.173 174.961   3
  -1  -9   6 949.904 178.337   1
  -1  -9   5 39554.6 992.255   1
  -1   9   5 40786.1 920.808   5
   1   9  -5 38869.3 919.971   1
   1   9  -4 598.648 126.228   1
  -1  -9   4 518.783 157.248   2
  -1  -9   4 684.764 140.158   1
  -1   9   4 565.653 130.762   5
  -1  -9   3 6461.19 332.732   2
   1  -9  -3 6474.59 335.903   6
   1   9  -3 6516.87 306.129   1
  -1   9   2 5588.54 227.206   2
   1   9  -2 5484.84 272.323   1
  -1  -9   2 5676.32 300.604   2
   1  -9  -2 5168.17 291.396   6
   1   9  -1 64829.7 1163.15   2
  -1  -9   1 62606.8 1182.40   2
  -1   9   1 64248.8 1035.54   2
   1   9   0 12779.7 416.886   2
   1   9   0 14282.0 536.148   5
   1  -9   0 12818.8 356.777   2
   1   9   1 20400.6 660.243   5
   1   9   1 19374.2 546.762   2
  -1  -9  -1 20670.8 510.870   6
  -1   9  -1 21206.7 622.077   1
   1  -9   1 20230.8 493.463   2
   1  -9   2 2496.52 189.067   2
   1   9   2 2545.21 241.168   5
  -1   9  -2 2501.88 221.227   1
   1   9   3 83365.6 1601.01   5
  -1   9  -3 85701.5 1580.62   1
   1   9   3 83351.7 1450.33   6
  -1   9  -3 84876.0 1461.30   4
   1  -9   3 82895.5 1636.43   1
  -1   9  -4 1380.46 149.035   4
  -1  -9  -4 1262.45 176.979   3
   1   9   4 1388.13 186.799   5
   1  -9   4 1611.36 211.365   1
   1   9   4 1419.46 163.614   6
  -1  -9  -5 61560.6 1333.53   3
   1   9   5 60369.7 1295.48   5
   1  -9   5 61981.0 1432.90   1
  -1  -9  -5 62277.9 1229.10   5
  -1   9  -5 62291.9 1111.91   4
  -1  -9  -6 28416.0 856.276   3
  -1  -9  -6 28211.7 743.162   5
  -1   9  -6 29518.4 632.852   4
   1   9   6 27902.1 914.795   1
   1  -9   6 30345.3 970.139   1
   1   9   6 26513.3 800.077   5
   1   9   7 13573.5 648.933   1
  -1  -9  -7 13362.7 598.813   3
   1  -9   7 12612.8 633.639   1
   1   9   7 13271.4 535.120   5
  -1   9  -7 13693.9 369.270   4
   1   9   8 3477.33 363.603   1
   1  -9   8 3417.71 377.231   1
   1   9   8 3606.69 292.556   5
  -1  -9  -8 4020.91 351.421   3
  -1  -9  -9 9206.24 543.638   3
   1   9   9 9422.60 471.406   5
   1   9   9 9953.74 611.286   1
   1  -9   9 8567.23 581.598   1
   1   9  10 3771.74 302.046   5
   1  -9  10 3467.00 382.336   1
   1   9  10 3821.69 425.691   1
   1  -9  11 11227.2 704.791   1
   1   9  11 10293.7 492.450   5
   1   9  11 9885.73 695.894   1
   1  -9  12 62.9149 218.453   1
   1   9  12 159.367 209.615   1
   1  -9  13 4504.66 505.551   1
   1   9  13 3727.71 477.526   1
   1  -9  14 263.105 241.383   1
   1   9  14 466.807 248.835   1
   1  -9  15 2118.98 400.748   1
   1   9  15 2441.25 437.292   1
   1  -9  16-790.318 329.995   1
   1   9  16 360.103 274.152   1
  -1  10  17 2112.39 411.538   1
  -1 -10  17 999.996 327.417   1
  -1 -10  16 301.817 225.793   1
  -1  10  16 623.119 324.337   1
  -1  10  15 1402.66 360.696   1
  -1 -10  15 1416.86 340.957   1
  -1 -10  14 1666.34 327.783   1
  -1  10  14 2036.91 419.593   1
  -1 -10  13 1771.75 329.541   1
  -1  10  13 1728.47 326.542   1
  -1  10  12 1029.76 296.601   1
  -1 -10  12 1313.82 270.088   1
   1 -10 -12 985.061 254.355   3
  -1  10  11 5099.89 298.724   5
   1 -10 -11 4442.91 439.362   3
  -1  10  11 5119.70 488.178   1
  -1 -10  11 4982.39 454.727   1
  -1  10  10 62.5957 103.248   5
  -1  10  10-179.835 184.806   1
  -1 -10  10-72.2745 191.867   1
   1 -10 -10 332.952 189.379   3
  -1  10   9 8935.94 405.132   5
  -1  10   9 9249.40 596.652   1
   1 -10  -9 8779.39 552.349   3
  -1 -10   9 8715.51 543.179   1
  -1 -10   8 6464.38 440.218   1
   1 -10  -8 5577.56 414.791   3
   1  10  -8 5050.73 170.532   4
  -1  10   8 5810.05 321.421   5
   1 -10  -7 10560.9 550.615   3
  -1  10   7 10092.2 434.576   5
   1  10  -7 9974.54 303.726   4
  -1 -10   7 10742.6 531.288   1
   1 -10  -6 6197.55 406.585   3
  -1  10   6 6225.77 340.877   5
  -1 -10   6 7035.04 416.457   1
  -1 -10   5 3636.22 291.851   2
   1  10  -5 3881.40 259.345   1
  -1  10   5 3718.65 274.330   5
  -1 -10   5 4049.30 297.677   1
  -1 -10   4 1480.32 192.223   2
  -1 -10   4 1428.53 183.792   1
  -1  10   4 1463.89 185.707   5
   1  10  -4 1463.69 167.728   1
  -1 -10   3 4843.59 298.303   2
   1 -10  -3 5105.96 331.715   6
   1  10  -3 5133.69 283.233   1
   1 -10  -2 2984.99 235.093   6
   1  10  -2 3173.14 222.374   1
  -1 -10   2 2929.45 233.092   2
  -1  10   2 3109.94 177.217   2
  -1 -10   1 317.777 115.916   2
   1  10  -1 391.908 113.530   2
  -1  10   1 481.674 96.5221   2
   1 -10   0 32342.4 662.635   2
   1  10   0 32236.4 895.174   5
   1  10   0 31712.3 741.665   2
  -1  10  -1 69020.8 1347.99   1
  -1 -10  -1 65383.9 1177.96   6
   1 -10   1 67870.0 1158.26   2
   1  10   1 66295.2 1234.62   2
   1  10   1 68717.1 1431.10   5
   1 -10   2 230.843 94.8510   2
   1  10   2 61.4535 142.498   5
   1 -10   3 13489.3 481.828   2
   1  10   3 14124.9 568.366   5
   1  10   3 15472.2 482.254   6
  -1  10  -4 3607.59 228.258   4
   1 -10   4 3295.77 296.878   1
   1  10   4 3349.02 238.199   6
   1  10   4 3628.74 290.076   5
   1 -10   5 14658.5 643.652   1
  -1 -10  -5 15012.6 593.087   3
  -1  10  -5 15151.7 461.521   4
   1  10   5 14729.2 573.205   5
   1 -10   6 1133.36 223.383   1
  -1 -10  -6 796.675 173.810   3
  -1  10  -6 1189.70 128.345   4
   1  10   6 820.588 187.491   1
   1  10   6 1326.12 197.186   5
  -1 -10  -7 4451.24 356.062   3
   1 -10   7 4622.63 395.857   1
   1  10   7 4008.64 310.141   5
  -1  10  -7 4849.61 221.118   4
   1  10   7 4222.37 385.515   1
   1 -10   8 5584.21 455.228   1
   1  10   8 5278.87 446.361   1
   1  10   8 5105.20 350.621   5
  -1 -10  -8 5546.13 417.276   3
   1  10   9 5064.02 356.748   5
  -1 -10  -9 5140.08 422.407   3
   1 -10   9 5316.16 467.058   1
   1  10   9 5123.56 467.711   1
  -1 -10 -10 5125.01 431.415   3
   1  10  10 4371.81 333.960   5
   1  10  10 4363.82 459.700   1
   1 -10  10 4221.19 441.339   1
   1  10  11 1958.19 344.196   1
   1  10  11 1774.15 224.530   5
   1 -10  11 2259.46 373.353   1
   1 -10  12 2309.86 370.679   1
   1  10  12 2560.97 392.227   1
   1 -10  13 1118.00 321.441   1
   1  10  13 1233.02 333.125   1
   1 -10  14 252.231 271.219   1
   1  10  14-90.7520 247.708   1
   1 -10  15 173.412 248.957   1
   1  10  15-91.9973 235.359   1
   1  10  16 131.082 265.274   1
   1 -10  16 451.611 293.478   1
  -1 -11  17 342.056 263.091   1
  -1  11  16 809.811 290.414   1
  -1 -11  16 628.217 278.463   1
  -1  11  15 2024.95 405.150   1
  -1 -11  15 1597.49 347.328   1
  -1 -11  14 7741.64 642.644   1
  -1  11  14 7735.65 660.161   1
  -1 -11  13 4281.34 453.787   1
   1 -11 -13 4387.28 460.948   3
  -1  11  13 4189.76 483.137   1
  -1 -11  12 8766.31 630.463   1
   1 -11 -12 9064.96 621.454   3
  -1  11  12 8591.59 658.604   1
  -1  11  11 13449.2 510.167   5
   1 -11 -11 12338.8 713.557   3
  -1  11  11 13539.2 801.657   1
  -1 -11  11 13884.6 741.723   1
  -1 -11  10 10278.7 614.410   1
  -1  11  10 10890.5 463.954   5
  -1  11  10 10264.1 673.299   1
   1 -11 -10 10214.0 629.096   3
  -1  11   9 398.468 119.569   5
   1 -11  -9 503.345 195.947   3
  -1 -11   9 443.053 176.716   1
  -1  11   9 240.103 176.283   1
   1 -11  -8 29.3960 139.099   3
  -1  11   8 229.922 120.139   5
   1  11  -8 3.26429 41.7993   4
  -1 -11   8 123.953 168.000   1
   1  11  -7 5690.51 245.462   4
  -1  11   7 6272.62 359.974   5
  -1 -11   7 6037.93 413.932   1
   1 -11  -7 5704.36 418.441   3
  -1 -11   6 5346.49 372.904   1
  -1  11   6 4665.92 316.498   5
   1 -11  -6 5166.88 381.023   3
  -1 -11   6 5081.21 369.901   2
  -1 -11   5 7348.71 397.851   1
  -1  11   5 7500.02 396.866   5
  -1 -11   5 6963.22 394.460   2
  -1 -11   4 29721.7 831.372   2
   1  11  -4 32898.8 807.588   1
  -1  11   4 31111.4 864.652   5
  -1 -11   3 20365.3 629.450   2
   1  11  -3 20592.5 603.812   1
   1 -11  -3 19626.6 636.582   6
  -1  11   3 18768.7 508.379   2
  -1 -11   2 23926.4 675.827   2
   1 -11  -2 24359.7 706.377   6
  -1  11   2 24118.4 560.213   2
   1  11  -2 24296.0 667.215   1
   1  11  -1 73494.6 1352.67   2
  -1  11   1 75899.8 1229.38   2
   1  11   0 12324.1 437.956   2
   1 -11   0 12175.2 382.749   2
  -1 -11   0 12137.9 404.936   6
   1  11   0 12866.4 564.506   5
   1 -11   1 59411.7 1072.56   2
   1  11   1 57826.8 1142.76   2
  -1 -11  -1 57805.1 1090.86   6
   1  11   1 59720.8 1354.46   5
   1 -11   2 40969.7 881.156   2
   1  11   2 41768.8 1079.57   5
   1  11   2 41080.8 919.661   2
   1  11   3 7555.62 424.885   5
   1 -11   3 7739.97 353.767   2
   1  11   4 25261.4 804.131   5
   1 -11   4 24608.4 839.089   1
  -1  11  -4 26287.3 682.116   4
   1  11   4 24289.1 682.406   6
  -1 -11  -5 43638.8 1118.29   3
  -1  11  -5 46021.1 943.137   4
   1  11   5 42666.0 1105.64   5
   1 -11   5 44458.6 1212.55   1
   1  11   6 15000.8 613.846   5
  -1 -11  -6 15748.4 639.675   3
  -1  11  -6 15432.1 464.100   4
   1 -11   6 14690.6 701.045   1
   1  11   7 3626.35 359.464   1
  -1  11  -7 4235.32 217.854   4
  -1 -11  -7 3361.62 313.659   3
   1  11   7 4143.79 324.302   5
   1 -11   7 3920.14 372.800   1
  -1  11  -8 7147.62 259.344   4
  -1 -11  -8 7223.69 476.680   3
   1  11   8 6843.24 514.140   1
   1  11   8 6694.18 415.248   5
   1 -11   8 7875.36 537.977   1
   1  11   9 8112.86 456.833   5
   1  11   9 9290.58 613.903   1
   1 -11   9 8820.53 610.082   1
  -1 -11  -9 8660.07 542.606   3
   1 -11  10 3163.11 408.273   1
   1  11  10 3251.11 391.788   1
   1  11  10 3374.82 333.455   5
  -1 -11 -10 3630.68 383.901   3
   1  11  11 2268.49 368.866   1
  -1 -11 -11 1806.36 290.849   3
   1  11  11 1901.46 237.429   5
   1 -11  11 1735.03 333.786   1
   1 -11  12 2449.27 376.942   1
   1  11  12 2456.64 397.317   1
   1  11  13 2020.19 385.550   1
   1 -11  13 2285.72 392.261   1
   1  11  14 1762.01 364.662   1
   1 -11  14 2064.39 365.023   1
   1 -11  15 2377.21 426.498   1
   1  11  15 1496.98 384.718   1
   1 -11  16 933.223 313.565   1
  -1 -12  17-359.352 272.641   1
  -1 -12  16 1098.84 318.133   1
  -1  12  16 1029.56 355.529   1
  -1  12  15 689.652 305.965   1
  -1 -12  15-168.590 240.037   1
  -1 -12  14 2612.10 388.982   1
  -1  12  14 3682.37 483.783   1
   1 -12 -13 1033.14 267.076   3
  -1 -12  13 142.775 196.030   1
  -1  12  13 997.174 311.816   1
  -1 -12  12 2716.68 369.382   1
  -1  12  12 3552.13 449.573   1
   1 -12 -12 2700.57 364.415   3
  -1 -12  11 1517.63 290.268   1
   1 -12 -11 1497.12 287.074   3
  -1  12  11 951.063 168.725   5
  -1  12  11 847.766 265.829   1
  -1  12  10 2463.18 360.905   1
  -1 -12  10 1780.40 293.939   1
   1 -12 -10 1820.04 291.879   3
  -1  12  10 1485.18 194.462   5
  -1 -12   9 9438.06 568.002   1
   1 -12  -9 10100.6 603.586   3
  -1  12   9 9859.82 457.112   5
   1  12  -8 12115.3 351.171   4
  -1  12   8 11624.2 511.397   5
  -1 -12   8 12283.9 619.538   1
   1 -12  -8 12078.8 634.738   3
   1  12  -7 111.038 71.1367   4
   1 -12  -7 210.400 153.735   3
  -1  12   7 112.100 106.084   5
  -1 -12   7 81.9093 143.747   2
  -1 -12   7-151.432 167.414   1
   1 -12  -6 5621.66 409.764   3
  -1 -12   6 6645.66 411.249   1
  -1 -12   6 5344.13 375.149   2
  -1  12   6 6066.57 373.584   5
  -1  12   5 3038.57 277.589   5
  -1 -12   5 2918.99 266.330   2
  -1  12   4 12196.7 539.362   5
  -1 -12   4 12893.1 529.277   2
   1 -12  -4 12696.2 539.773   6
  -1  12   3 381.827 95.9810   2
  -1 -12   3 344.569 116.594   2
   1  12  -3 382.338 111.268   1
   1 -12  -3 424.986 128.839   6
   1 -12  -2 11026.6 464.920   6
  -1  12   2 11080.5 359.508   2
  -1 -12   2 11279.6 461.806   2
   1  12  -2 11435.8 446.987   1
  -1 -12   1 3800.17 270.417   2
  -1  12   1 4095.76 216.195   2
   1  12  -1 3725.60 241.421   2
  -1 -12   0 12475.4 422.110   6
   1  12   0 12141.3 440.793   2
   1  12   0 12133.4 588.831   5
  -1 -12  -1 3609.41 237.066   6
   1 -12   1 3734.40 230.219   2
   1  12   1 4043.76 347.551   5
   1  12   1 4024.93 257.193   2
   1  12   2 14823.4 622.279   5
   1  12   2 14183.7 498.893   2
   1 -12   2 15160.9 486.705   2
   1 -12   3 1395.81 171.415   2
   1  12   3 1428.92 219.498   5
   1 -12   4 5855.27 334.092   2
  -1  12  -4 5894.55 318.740   4
   1  12   4 5688.08 391.593   5
  -1 -12  -5-8.94655 133.487   3
  -1  12  -5 150.003 90.4378   4
   1  12   5 129.616 121.047   5
   1 -12   5-45.4152 145.683   1
   1  12   6 9640.83 506.787   5
   1 -12   6 10725.8 581.654   1
  -1 -12  -6 10646.0 543.551   3
  -1  12  -6 10252.2 387.455   4
   1  12   7 1152.72 228.105   1
  -1  12  -7 1617.54 147.873   4
  -1 -12  -7 1529.48 244.345   3
   1 -12   7 1704.66 272.469   1
   1  12   7 1939.66 239.200   5
   1  12   8-14.6903 175.660   1
  -1 -12  -8-114.442 158.492   3
   1 -12   8 35.2404 164.548   1
   1  12   8 77.8713 119.806   5
   1  12   9-156.391 200.155   1
   1 -12   9-130.772 185.754   1
   1  12   9-184.996 147.159   5
  -1 -12  -9 181.730 164.061   3
   1 -12  10 5511.81 518.793   1
   1  12  10 6006.24 405.064   5
  -1 -12 -10 5803.88 470.744   3
   1  12  10 5544.20 511.253   1
  -1 -12 -11 1905.10 304.753   3
   1 -12  11 2180.35 370.316   1
   1  12  11 1696.47 336.618   1
   1  12  11 1706.44 230.920   5
   1 -12  12 1615.48 328.174   1
   1  12  12 2070.10 375.452   1
   1  12  13 192.146 235.770   1
   1 -12  13 5.58590 226.508   1
   1  12  14 170.111 234.972   1
   1 -12  14-10.5012 208.174   1
   1 -12  15 40.3778 247.382   1
   1  12  15-107.119 232.488   1
   1 -12  16 83.6453 246.427   1
  -1 -13  17-151.997 298.203   1
  -1  13  16 2821.15 486.078   1
  -1 -13  16 2404.17 423.269   1
  -1 -13  15 1098.33 335.149   1
  -1  13  15 1033.73 337.477   1
  -1 -13  14 1607.48 329.490   1
  -1  13  14 2151.08 414.045   1
   1 -13 -13 1968.52 347.255   3
  -1  13  13 1372.18 343.412   1
  -1 -13  13 1972.75 371.565   1
   1 -13 -12 7395.15 585.956   3
  -1 -13  12 7734.65 595.299   1
  -1  13  12 8261.68 657.714   1
  -1  13  11 271.284 229.546   1
   1 -13 -11 337.536 223.321   3
  -1 -13  11 184.281 185.187   1
  -1 -13  10 21103.4 913.138   1
   1 -13 -10 23428.8 963.428   3
  -1  13  10 22449.2 1013.76   1
  -1  13  10 21636.2 719.375   5
  -1 -13   9-128.933 179.865   1
  -1  13   9-41.5531 111.377   5
   1 -13  -9-327.633 204.748   3
  -1  13   8 8883.08 462.766   5
   1 -13  -8 9305.35 573.972   3
  -1 -13   8 10280.7 575.514   1
  -1 -13   8 9269.39 540.865   2
  -1  13   7 375.262 145.039   5
   1 -13  -7 259.086 165.922   3
  -1 -13   7 347.098 169.285   2
  -1 -13   7 568.272 178.738   1
   1  13  -7 442.409 95.5036   4
  -1 -13   6 1322.33 204.621   1
  -1  13   6 1251.51 196.579   5
  -1 -13   6 1092.88 192.697   2
  -1  13   5 2892.05 281.457   5
  -1 -13   5 3083.21 291.121   2
   1 -13  -4 20614.2 719.737   6
  -1  13   4 20543.2 741.817   5
  -1 -13   4 20347.9 694.519   2
   1 -13  -3 990.573 159.920   6
  -1  13   3 1218.99 132.580   2
  -1 -13   3 1103.96 183.185   2
   1 -13  -2 55187.3 1212.42   6
  -1  13   2 54516.9 1019.29   2
  -1 -13   2 54384.0 1195.83   2
  -1  13   1 1445.93 134.308   2
  -1 -13   1 1538.76 186.874   2
   1  13  -1 1476.27 166.322   2
   1  13   0 49287.3 1279.08   5
   1  13   0 47913.4 1019.00   2
  -1 -13   0 47060.7 983.426   6
   1 -13   1 1214.47 148.132   2
   1  13   1 1452.61 246.387   5
  -1 -13  -1 1313.71 153.053   6
   1  13   1 1550.87 168.520   2
   1 -13   2 65682.0 1251.82   2
   1  13   2 65649.4 1548.17   5
   1 -13   3 5735.53 317.596   2
   1  13   3 5898.36 420.273   5
   1 -13   4 44879.3 1042.43   2
   1  13   4 44407.5 1200.71   5
  -1 -13  -5 3236.05 304.768   3
   1 -13   5 3227.64 277.580   2
   1  13   5 3434.27 321.234   5
  -1 -13  -6 4555.16 369.810   3
  -1  13  -6 4645.96 264.907   4
   1 -13   6 4848.76 400.451   1
   1  13   6 4557.70 370.400   5
  -1 -13  -7 473.900 175.795   3
  -1  13  -7 681.312 113.622   4
   1  13   7 441.990 160.542   5
   1 -13   7 353.476 183.665   1
   1  13   7 394.674 189.760   1
   1 -13   8 3349.79 384.853   1
   1  13   8 2652.45 349.709   1
   1  13   8 2948.98 306.180   5
  -1 -13  -8 3387.71 337.895   3
  -1 -13  -9 563.498 186.635   3
   1 -13   9 1418.71 279.174   1
   1  13   9 747.775 232.814   1
   1  13   9 1209.55 207.488   5
   1  13  10 12557.3 763.828   1
   1  13  10 12510.1 599.746   5
  -1 -13 -10 13087.9 715.229   3
   1 -13  10 12697.7 757.918   1
   1  13  11-154.086 142.096   5
  -1 -13 -11-318.334 174.822   3
   1  13  11-30.5508 191.605   1
   1 -13  11-45.5595 197.033   1
   1  13  12 7770.24 669.678   1
   1 -13  12 7480.52 629.063   1
   1 -13  13 30.5406 226.329   1
   1  13  13-125.632 226.402   1
   1  13  14 7013.96 665.502   1
   1 -13  14 7189.57 665.104   1
   1 -13  15-189.696 284.846   1
   1  13  15-400.323 307.872   1
   1 -13  16 2574.74 450.850   1
  -1 -14  17 52.8896 246.165   1
  -1 -14  16 944.932 308.694   1
  -1  14  15 2526.91 464.119   1
  -1 -14  15 2546.94 407.920   1
   1 -14 -14 1751.75 338.741   3
  -1  14  14 2052.85 400.280   1
  -1 -14  14 1800.39 355.006   1
   1 -14 -13 1212.75 296.221   3
  -1 -14  13 1207.60 309.757   1
  -1  14  13 1243.00 323.795   1
   1 -14 -12 998.077 284.637   3
  -1  14  12 214.230 227.278   1
  -1 -14  12 1149.35 271.790   1
  -1 -14  11 4197.65 412.004   1
  -1  14  11 3669.92 458.948   1
   1 -14 -11 3469.93 398.556   3
  -1  14  10 3865.51 451.023   1
   1 -14 -10 3190.98 379.247   3
  -1 -14  10 3982.65 406.293   1
  -1  14  10 3649.69 312.969   5
  -1 -14   9 5298.27 439.793   1
  -1 -14   9 5358.57 440.501   2
   1 -14  -9 4796.45 445.207   3
  -1  14   9 4550.93 363.707   5
  -1  14   8-27.2511 128.315   5
  -1 -14   8 136.746 199.627   2
  -1 -14   8-23.6323 154.447   1
   1 -14  -8-89.9493 165.592   3
   1  14  -7-8.37359 74.2047   4
  -1  14   7-196.222 139.375   5
  -1 -14   7-15.3504 152.802   2
  -1 -14   7 66.0182 138.535   1
   1 -14  -7-150.496 172.811   3
  -1 -14   6 576.045 183.992   2
  -1  14   6 360.889 168.295   5
  -1  14   5 1359.42 216.993   5
  -1 -14   5 1419.02 219.147   2
   1 -14  -4-66.6730 114.222   6
  -1 -14   4 76.9048 131.434   2
  -1  14   4-58.5696 140.174   5
  -1  14   4 180.006 86.7700   2
  -1  14   3 1804.89 164.077   2
   1 -14  -3 1824.74 220.119   6
  -1  14   3 2101.06 266.663   5
  -1 -14   3 1548.53 203.052   2
   1 -14  -2 12156.4 522.590   6
  -1  14   2 11840.2 395.345   2
  -1 -14   2 12408.9 504.712   2
  -1  14   1 22222.4 563.434   2
  -1 -14   0 234.736 120.153   6
   1  14   0 223.837 155.063   5
   1 -14   1 1345.93 163.486   2
  -1 -14  -1 1339.50 167.535   6
   1  14   1 1344.46 240.541   5
   1  14   2 262.450 182.801   5
   1 -14   2-24.3762 92.3231   2
   1 -14   3 5723.55 324.481   2
   1  14   3 5021.61 388.909   5
   1  14   4 1493.55 246.484   5
   1 -14   4 1737.35 208.799   2
   1  14   5 3023.21 314.153   5
   1 -14   5 2964.23 280.742   2
   1 -14   6 10884.0 627.351   1
   1 -14   6 11893.5 565.430   2
   1  14   6 11396.3 592.337   5
  -1 -14  -6 11355.3 594.107   3
   1 -14   7 5204.88 451.159   1
  -1 -14  -7 4067.66 377.698   3
   1  14   7 4352.87 379.548   5
  -1 -14  -8 5688.95 456.458   3
   1 -14   8 6263.72 504.345   1
   1  14   8 6030.76 423.417   5
   1  14   8 5750.04 498.252   1
  -1 -14  -9 2236.59 306.147   3
   1  14   9 2391.15 285.871   5
   1 -14   9 2860.77 380.244   1
   1  14   9 2042.54 317.764   1
   1  14  10 121.314 146.832   5
   1  14  10 208.277 214.854   1
   1 -14  10 58.8989 182.018   1
  -1 -14 -10 92.5101 166.127   3
  -1 -14 -11 160.947 168.936   3
   1  14  11 117.687 210.633   1
   1 -14  11 432.834 244.233   1
  -1 -14 -12 152.994 172.055   3
   1  14  12 268.378 252.032   1
   1 -14  12-89.4996 216.276   1
   1 -14  13 310.942 230.003   1
   1  14  13-26.8645 221.684   1
   1  14  14 3.06136 246.811   1
   1 -14  14 261.169 266.117   1
   1  14  15 25.1454 256.351   1
   1 -14  15 122.283 265.815   1
  -1 -15  17 703.899 334.230   1
  -1 -15  16-9.13026 254.438   1
  -1  15  15 3500.41 521.596   1
  -1 -15  15 3614.70 477.210   1
  -1 -15  14 292.947 226.042   1
  -1  15  14-198.719 266.497   1
   1 -15 -14 133.594 200.916   3
  -1  15  13 3394.09 477.745   1
  -1 -15  13 3099.15 425.670   1
   1 -15 -13 4527.25 485.321   3
   1 -15 -12 296.151 222.016   3
  -1  15  12 284.233 208.432   1
  -1 -15  12 375.306 223.383   1
   1 -15 -11 6066.31 533.049   3
  -1 -15  11 5972.94 504.065   2
  -1  15  11 6046.67 567.158   1
  -1 -15  11 5932.54 507.769   1
   1 -15 -10 1366.89 280.631   3
  -1  15  10 859.614 167.576   5
  -1 -15  10 426.056 197.319   1
  -1  15  10 988.677 275.218   1
  -1 -15  10 1144.45 263.003   2
   1 -15  -9 15669.3 790.773   3
  -1  15   9 14502.7 638.240   5
  -1 -15   9 15774.3 758.335   2
  -1 -15   9 16314.5 776.503   1
  -1 -15   8 7455.10 505.148   1
   1 -15  -8 7296.23 525.213   3
  -1  15   8 6876.82 446.651   5
  -1 -15   8 6636.42 472.569   2
  -1 -15   7 27003.5 916.120   2
   1 -15  -7 24446.6 964.335   3
  -1  15   7 25973.7 887.265   5
  -1 -15   6 3037.27 300.542   2
  -1  15   6 2450.90 288.765   5
  -1  15   5 7437.92 472.465   5
  -1 -15   5 7735.85 450.748   2
   1 -15  -4 259.967 125.360   6
  -1 -15   4 272.650 148.800   2
  -1  15   4 99.1532 81.2018   2
  -1  15   4 68.7853 140.913   5
   1 -15  -3 13827.3 586.259   6
  -1 -15   3 14273.4 585.249   2
  -1  15   3 14139.0 657.677   5
  -1  15   3 13713.6 448.029   2
   1 -15  -2 813.185 152.424   6
  -1  15   2 771.780 116.153   2
  -1 -15   2 875.337 169.466   2
  -1  15   1 22011.0 577.289   2
  -1 -15   0 5180.33 299.111   6
   1  15   0 5009.38 427.085   5
   1 -15   1 20491.9 603.410   2
   1  15   1 20214.0 840.890   5
  -1 -15  -1 21013.8 629.675   6
   1 -15   2 21269.7 653.514   2
   1  15   2 23144.7 887.560   5
   1  15   3 18064.3 769.348   5
   1 -15   3 18703.0 614.452   2
   1 -15   4 135.648 129.345   2
   1  15   4 212.908 156.208   5
   1  15   5 9444.14 551.952   5
   1 -15   5 8877.69 459.872   2
   1  15   6 11746.6 610.789   5
   1 -15   6 12060.5 563.246   2
  -1 -15  -6 11941.5 616.817   3
   1 -15   7 30830.2 1104.88   1
  -1 -15  -7 29535.1 1020.52   3
   1  15   7 28936.5 996.338   5
   1 -15   7 30511.9 975.091   2
   1 -15   8 96.6674 180.846   1
   1  15   8 39.5029 141.072   5
   1  15   8 47.8745 178.826   1
  -1 -15  -8 21.5109 161.487   3
   1  15   9 10714.7 580.693   5
   1 -15   9 11069.4 687.818   1
  -1 -15  -9 10080.7 614.835   3
   1  15   9 10753.7 692.416   1
  -1 -15 -10 1750.63 294.823   3
   1 -15  10 1682.45 308.869   1
   1  15  10 1369.52 303.343   1
   1  15  10 1278.62 233.005   5
   1 -15  11 6603.06 576.786   1
   1  15  11 6184.53 573.190   1
  -1 -15 -11 6972.26 551.927   3
  -1 -15 -12 929.577 265.234   3
   1 -15  12 667.508 254.342   1
   1  15  12 1293.14 314.351   1
   1  15  13 3354.83 482.949   1
   1 -15  13 3780.63 488.646   1
   1  15  14 286.144 242.625   1
   1 -15  14 540.824 285.958   1
   1 -15  15 3428.47 484.329   1
  -1 -16  16-198.831 237.864   1
  -1 -16  15-137.510 228.613   2
  -1 -16  15 68.5624 200.350   1
  -1  16  14 58.5641 226.572   1
   1 -16 -14 354.373 220.054   3
  -1 -16  14 364.010 239.372   2
  -1 -16  14-90.0182 217.478   1
  -1  16  13 794.272 295.837   1
  -1 -16  13 1099.48 277.468   2
  -1 -16  13 990.497 282.781   1
   1 -16 -13 1219.36 292.139   3
   1 -16 -12 1019.77 293.326   3
  -1 -16  12 1435.01 285.773   2
  -1  16  12 1188.01 317.413   1
  -1 -16  12 1113.60 276.454   1
   1 -16 -11 1933.66 318.204   3
  -1 -16  11 2253.97 339.823   1
  -1  16  11 2339.24 388.799   1
  -1 -16  11 2018.45 322.346   2
  -1 -16  10 112.961 180.731   1
  -1 -16  10 51.6595 181.454   2
   1 -16 -10-150.263 197.423   3
  -1  16  10 284.589 164.768   5
  -1  16  10 273.343 206.281   1
  -1 -16   9 841.426 224.061   1
  -1 -16   9 1242.62 265.006   2
   1 -16  -9 1063.26 250.143   3
  -1  16   9 1192.25 221.030   5
  -1 -16   8 1684.86 262.794   2
   1 -16  -8 1773.13 297.260   3
  -1  16   8 2126.89 275.883   5
   1 -16  -7 4797.40 434.605   3
  -1 -16   7 4585.94 387.925   2
  -1  16   7 5236.70 411.307   5
  -1  16   6 489.550 194.177   5
  -1 -16   6 273.457 149.862   2
  -1  16   5 4409.43 385.815   5
  -1 -16   5 3928.78 322.263   2
  -1 -16   4 126.669 144.465   2
   1 -16  -4 5.62216 129.061   6
  -1  16   4 6.36377 161.875   5
  -1  16   3 23833.6 908.122   5
  -1  16   3 23822.6 628.050   2
  -1 -16   3 24202.5 779.554   2
   1 -16  -3 24779.5 813.841   6
  -1 -16   2-99.0465 147.257   2
  -1  16   2-33.4154 79.4541   2
   1 -16  -2 43.8251 125.269   6
   1 -16  -1 782.148 165.841   6
  -1  16   1 999.351 132.964   2
   1  16   0 4473.70 420.294   5
  -1 -16   0 4093.41 276.737   6
   1  16   1 285.777 195.562   5
  -1 -16  -1 147.884 112.332   6
   1 -16   2 1646.86 188.322   2
   1  16   2 1787.78 293.937   5
   1  16   3 161.277 181.901   5
   1 -16   3 190.842 144.496   2
   1 -16   4 5272.30 344.053   2
   1  16   4 5020.43 435.080   5
   1  16   5 5164.33 432.706   5
   1 -16   5 5490.42 368.024   2
  -1 -16  -6 4443.68 399.556   3
   1 -16   6 3888.49 337.557   2
   1  16   6 3841.59 381.114   5
  -1 -16  -7 1833.15 282.708   3
   1  16   7 2209.20 293.757   5
   1 -16   7 2101.78 287.517   2
   1  16   8 53.2817 152.512   5
   1 -16   8 42.2478 175.345   1
  -1 -16  -8 62.3264 158.216   3
   1  16   8 166.944 190.079   1
   1 -16   8 151.299 154.037   2
   1 -16   9 3231.97 358.333   2
  -1 -16  -9 2873.22 344.752   3
   1  16   9 2473.96 369.236   1
   1 -16   9 3203.33 393.042   1
   1  16   9 2996.36 327.898   5
   1 -16  10 35.2216 190.460   1
  -1 -16 -10-187.694 193.622   3
   1  16  10-56.4325 224.293   1
   1  16  10-191.138 168.202   5
  -1 -16 -11 400.647 178.697   3
   1 -16  11 887.064 278.168   1
   1  16  11 285.254 210.954   1
  -1 -16 -12-277.142 197.586   3
   1  16  12 74.4724 232.545   1
   1 -16  12 54.8877 228.189   1
   1  16  13-88.6920 251.656   1
   1 -16  13-200.265 234.271   1
   1 -16  14 147.779 236.067   1
   1  16  14 493.212 290.526   1
   1 -16  15 746.381 307.874   1
  -1 -17  16 2973.31 484.909   1
  -1 -17  15-109.862 214.562   1
  -1 -17  15 67.9413 242.680   2
  -1  17  14 367.909 271.314   1
  -1 -17  14-548.444 255.966   1
   1 -17 -14-223.023 199.968   3
  -1 -17  14 156.230 217.213   2
  -1  17  13 809.281 291.339   1
  -1 -17  13 904.992 260.317   1
   1 -17 -13 1007.01 290.078   3
  -1 -17  13 171.715 214.117   2
  -1 -17  12 838.083 249.917   1
  -1  17  12 881.664 309.379   1
  -1 -17  12 793.751 254.522   2
   1 -17 -12 743.579 265.293   3
  -1 -17  11 926.486 269.716   2
  -1 -17  11 973.483 247.731   1
   1 -17 -11 900.332 255.971   3
  -1  17  11 684.302 275.475   1
  -1 -17  10 3386.25 384.511   2
   1 -17 -10 3448.28 408.617   3
  -1  17  10 3706.06 340.818   5
  -1 -17  10 3462.37 383.443   1
  -1  17   9 4279.65 377.335   5
   1 -17  -9 5111.32 478.862   3
  -1 -17   9 4635.47 418.132   2
   1 -17  -8 10279.9 649.344   3
  -1  17   8 10342.6 574.601   5
  -1 -17   8 10912.5 615.049   2
   1 -17  -7 7751.18 552.799   3
  -1  17   7 9368.47 553.922   5
  -1 -17   7 8681.84 530.358   2
  -1  17   6 3736.18 362.548   5
  -1 -17   6 3639.80 334.760   2
  -1 -17   5 3576.31 332.434   2
  -1  17   5 3225.15 351.788   5
  -1 -17   4 5743.61 395.913   2
  -1  17   4 5939.92 460.383   5
  -1 -17   3 26020.6 834.511   2
  -1  17   3 26849.2 988.544   5
  -1  17   3 24753.7 660.854   2
   1 -17  -3 27149.6 865.435   6
  -1 -17   2 2179.88 249.377   2
   1 -17  -2 1743.35 220.244   6
  -1  17   2 1745.70 169.107   2
   1 -17  -1 9300.93 473.367   6
   1  17  -1 9179.76 614.355   5
  -1 -17   0 2250.10 210.096   6
   1  17   0 2537.14 346.664   5
   1  17   1 29619.2 1094.85   5
  -1 -17  -1 29333.9 808.992   6
   1  17   2 22957.1 935.928   5
   1 -17   2 21755.8 670.288   2
   1 -17   3 18977.0 642.185   2
   1  17   3 18727.7 838.444   5
   1 -17   4 7448.92 414.431   2
   1  17   4 6928.97 517.452   5
   1 -17   5 11271.0 536.434   2
   1  17   5 12866.5 690.548   5
   1  17   6 5067.65 442.909   5
   1 -17   6 4786.89 357.480   2
  -1 -17  -6 5115.61 436.760   3
  -1 -17  -7 9868.20 604.249   3
   1  17   7 10200.5 607.217   5
   1 -17   7 10106.5 550.948   2
   1  17   8 4589.24 468.601   1
  -1 -17  -8 4298.28 418.080   3
   1  17   8 4700.00 418.364   5
   1 -17   8 4412.11 390.007   2
   1  17   9 6056.28 461.529   5
   1 -17   9 5844.82 467.232   2
  -1 -17  -9 5828.12 483.913   3
   1 -17   9 6620.49 564.994   1
   1  17   9 6473.97 549.165   1
  -1 -17 -10 5241.09 475.257   3
   1  17  10 4736.73 416.542   5
   1 -17  10 5738.57 542.263   1
   1  17  10 3984.45 470.672   1
   1 -17  10 5646.01 470.212   2
   1  17  11 378.636 231.872   1
  -1 -17 -11 527.568 223.228   3
   1 -17  11 651.515 234.182   2
   1 -17  11 176.515 210.460   1
   1  17  12 384.386 271.551   1
   1 -17  12 11.5804 205.019   1
  -1 -17 -12 152.628 181.333   3
   1 -17  13 4330.82 517.254   1
   1  17  13 4278.39 536.429   1
  -1 -17 -13 4182.20 451.246   3
   1 -17  14 520.514 281.574   1
   1  17  14 818.535 303.062   1
   1 -17  15 1283.65 362.977   1
  -1 -18  15 1773.45 347.947   2
   1 -18 -15 1086.27 307.585   3
   1 -18 -14 1142.51 300.879   3
  -1 -18  14 99.5717 219.733   2
  -1 -18  14 651.634 257.168   1
  -1  18  14 1444.99 389.566   1
   1 -18 -13 57.0490 201.772   3
  -1 -18  13 363.560 237.510   2
  -1  18  13 594.474 284.747   1
  -1 -18  13 210.021 205.254   1
  -1 -18  12 2728.35 372.950   2
  -1 -18  12 3239.15 405.632   1
   1 -18 -12 2648.93 388.585   3
  -1  18  12 3718.64 496.468   1
  -1  18  11 264.526 236.273   1
   1 -18 -11 4.43506 190.045   3
  -1 -18  11-79.3598 181.481   2
  -1 -18  11-131.796 212.087   1
  -1 -18  10 4136.67 432.473   2
   1 -18 -10 3692.84 424.180   3
  -1 -18   9 93.8671 175.184   2
   1 -18  -9-2.28333 197.654   3
  -1  18   9 90.2755 150.230   5
  -1 -18   8 5653.49 456.243   2
  -1  18   8 5315.96 437.748   5
   1 -18  -8 5912.49 510.525   3
   1 -18  -7 613.141 229.069   3
  -1 -18   7 506.048 199.512   2
  -1  18   7 779.073 223.075   5
  -1 -18   6 9952.44 553.620   2
  -1  18   6 9447.69 589.262   5
  -1 -18   5 1206.89 226.129   2
  -1  18   5 663.089 202.702   5
  -1 -18   4 402.885 169.920   2
  -1  18   4 213.039 185.122   5
  -1  18   3 335.975 185.627   5
  -1 -18   3 541.594 175.675   2
   1 -18  -3 223.669 170.394   6
   1 -18  -2 6260.51 414.750   6
  -1  18   2 6030.09 487.815   5
   1  18  -1 365.182 193.646   5
  -1 -18   1 305.992 115.000   6
   1 -18  -1 380.154 147.394   6
  -1 -18   0 291.348 116.896   6
   1  18   0 19.8547 195.600   5
   1  18   1-93.5781 178.887   5
  -1 -18  -1 210.758 125.395   6
   1 -18   2 2069.56 234.444   2
   1  18   2 1505.10 308.233   5
   1  18   3 1583.96 296.162   5
   1 -18   3 1658.68 218.498   2
   1 -18   4 3756.64 312.466   2
   1  18   4 2949.90 368.344   5
   1  18   5 478.321 215.674   5
   1 -18   5 625.639 176.732   2
   1  18   6 1410.96 274.451   5
  -1 -18  -6 1480.78 264.402   3
   1 -18   6 1760.46 243.895   2
  -1 -18  -7 235.094 163.577   3
   1 -18   7 180.963 154.339   2
   1  18   7 375.022 175.315   5
   1 -18   8 2048.95 284.901   2
   1  18   8 1369.48 302.164   1
  -1 -18  -8 1586.21 283.168   3
   1  18   8 1515.32 270.345   5
  -1 -18  -9 244.366 176.858   3
   1  18   9 131.818 212.635   1
   1  18   9 29.8398 155.984   5
   1 -18   9 330.867 188.212   2
   1  18  10 1186.74 289.853   1
  -1 -18 -10 1234.96 273.141   3
   1 -18  10 972.989 251.249   2
  -1 -18 -11 883.349 243.773   3
   1 -18  11 313.187 188.522   2
   1  18  11 588.432 252.413   1
   1 -18  11 576.171 234.371   1
   1 -18  12-307.104 250.648   1
   1 -18  12-15.3556 205.533   2
  -1 -18 -12-65.2802 182.311   3
   1  18  12 529.437 279.337   1
   1  18  13 220.185 260.435   1
   1 -18  13-90.9533 235.170   1
   1 -18  13 313.668 230.675   2
  -1 -18 -13 501.653 222.900   3
   1 -18  14 3.46344 250.545   2
   1 -18  14 58.0671 222.997   1
   1 -19 -14 2018.83 371.582   3
  -1 -19  14 2380.75 382.108   2
   1 -19 -13-292.093 252.945   3
  -1 -19  13 19.0167 222.498   2
  -1 -19  13 480.008 264.177   1
  -1  19  13 388.008 275.251   1
  -1  19  12 2302.53 413.785   1
   1 -19 -12 1322.04 293.576   3
  -1 -19  12 1390.05 294.933   2
  -1  19  11-57.7740 232.148   1
  -1 -19  11 25.0684 211.419   2
   1 -19 -11 67.2724 190.706   3
   1 -19 -10 8039.45 619.684   3
  -1 -19  10 8092.23 580.594   2
   1 -19  -9 961.666 264.051   3
  -1  19   9 716.163 205.231   5
  -1 -19   9 894.658 246.665   2
  -1 -19   8 7278.26 512.450   2
   1 -19  -8 6808.48 546.585   3
  -1  19   8 7317.38 519.535   5
  -1 -19   7 3463.19 362.230   2
   1 -19  -7 4204.65 436.317   3
  -1  19   7 3917.83 398.017   5
  -1 -19   6 9669.91 549.462   2
  -1  19   6 9015.58 593.598   5
  -1 -19   5 1568.03 246.284   2
  -1  19   5 1592.72 306.617   5
  -1 -19   4 15572.5 669.739   2
  -1  19   4 16542.4 811.003   5
  -1 -19   3 142.668 140.609   2
   1 -19  -3 97.4923 145.112   6
  -1  19   3 125.377 184.848   5
  -1  19   2 19343.7 890.881   5
   1 -19  -2 17699.9 707.659   6
   1  19  -2 18175.8 907.205   5
   1  19  -1 823.091 254.040   5
  -1 -19   1 540.907 147.888   6
   1 -19  -1 491.348 160.830   6
  -1 -19   0 11598.8 493.158   6
   1  19   0 11184.8 702.274   5
   1  19   1 645.411 237.299   5
  -1 -19  -1 504.724 134.599   6
   1 -19   2 18498.4 632.524   2
   1  19   2 18581.3 900.552   5
   1  19   3 2588.18 366.658   5
   1 -19   3 2637.80 252.216   2
   1 -19   4 18891.2 686.990   2
   1  19   4 18958.6 903.490   5
   1 -19   5 147.120 145.509   2
   1  19   5 126.292 213.124   5
   1  19   6 11588.6 679.028   5
  -1 -19  -6 10980.1 641.423   3
   1 -19   6 11507.5 573.903   2
  -1 -19  -7-74.0528 180.658   3
   1 -19   7 91.9084 150.844   2
   1  19   7 350.409 200.148   5
   1  19   8 10699.4 648.262   5
   1 -19   8 10783.7 599.769   2
  -1 -19  -8 10321.0 650.287   3
   1  19   8 10926.6 713.487   1
   1  19   9 250.483 214.286   1
   1 -19   9 38.8525 171.801   2
   1  19   9 87.1289 161.925   5
  -1 -19  -9 175.262 190.333   3
   1  19  10 6438.44 577.987   1
   1 -19  10 6242.52 499.941   2
  -1 -19 -10 6418.03 544.245   3
  -1 -19 -11-219.899 190.677   3
   1 -19  11-81.5310 210.389   2
   1  19  11 79.0860 207.743   1
   1  19  12 3693.03 481.251   1
  -1 -19 -12 3292.82 411.633   3
   1 -19  12 3537.78 461.331   1
   1 -19  12 3292.18 402.998   2
   1 -19  13 91.1649 225.763   2
   1  19  13 564.743 302.897   1
   1 -19  13 281.177 263.140   1
  -1 -19 -13-38.8738 200.114   3
   1 -19  14 4888.69 550.998   1
   1 -19  14 4817.38 504.521   2
  -1 -20  14 613.730 264.775   2
   1 -20 -14 817.123 287.563   3
  -1 -20  13 475.651 235.279   2
  -1  20  13 608.829 318.190   1
   1 -20 -13 699.015 268.800   3
   1 -20 -12 1763.42 350.413   3
  -1  20  12 1155.87 312.640   1
  -1 -20  12 1977.17 341.751   2
  -1 -20  11 1227.27 281.408   2
   1 -20 -11 1682.75 344.993   3
  -1  20  11 1745.54 399.339   1
  -1 -20  10 768.200 251.955   2
   1 -20 -10 665.526 240.240   3
  -1 -20   9 786.809 220.399   2
  -1  20   9 453.186 196.642   5
   1 -20  -9 272.852 194.537   3
  -1 -20   8 2250.97 314.414   2
  -1  20   8 1495.12 266.279   5
   1 -20  -8 2058.66 333.103   3
  -1  20   7 2400.24 324.304   5
   1 -20  -7 2248.08 336.965   3
  -1 -20   7 2465.15 319.269   2
  -1 -20   6 4132.34 372.621   2
  -1  20   6 4420.15 428.473   5
  -1 -20   5 4439.78 373.640   2
  -1  20   5 3993.97 431.421   5
  -1  20   4 275.620 188.153   5
  -1 -20   4 396.302 181.859   2
  -1  20   3 603.298 253.956   5
   1 -20  -3 679.832 206.168   6
   1 -20  -2 1820.04 256.218   6
   1  20  -2 2050.17 368.836   5
  -1  20   2 1523.31 292.101   5
   1  20  -1 2545.80 387.099   5
   1 -20  -1 2339.50 268.630   6
  -1 -20   1 2304.14 235.825   6
   1  20   0 469.128 227.112   5
   1 -20   0 401.987 144.976   6
  -1 -20   0 545.576 128.541   6
  -1 -20  -1 410.091 141.826   6
   1  20   1 319.549 194.912   5
   1  20   2 8339.32 627.406   5
   1 -20   3 6789.55 391.993   2
   1  20   3 6636.62 551.685   5
   1  20   4 14346.9 800.700   5
   1 -20   4 14730.0 611.842   2
   1  20   5 1125.74 282.156   5
   1 -20   5 1175.62 217.323   2
   1  20   6 232.252 176.714   5
   1 -20   6 559.669 160.538   2
  -1 -20  -6 40.0686 176.747   3
  -1 -20  -7 1245.72 272.745   3
   1  20   7 1031.44 251.746   5
   1 -20   7 1532.84 246.580   2
   1 -20   8-180.106 156.546   2
   1  20   8-143.005 199.740   5
  -1 -20  -8-177.358 181.663   3
   1  20   8 21.9526 201.075   1
   1  20   9 245.981 178.259   5
   1 -20   9 15.6912 162.829   2
   1  20   9 614.039 262.841   1
  -1 -20  -9 100.269 197.394   3
  -1 -20 -10 3048.04 394.752   3
   1  20  10 2316.60 390.533   1
   1 -20  10 3256.15 378.711   2
   1  20  11-379.877 269.132   1
  -1 -20 -11 201.313 191.799   3
   1 -20  11-559.335 229.986   2
  -1 -20 -12 153.600 200.526   3
   1  20  12-331.348 244.198   1
   1 -20  12-272.277 207.760   2
  -1 -20 -13-10.8548 209.282   3
   1 -20  13-146.771 201.957   2
  -1 -21  14-205.943 274.344   2
   1 -21 -13 6048.91 569.579   3
  -1 -21  13 5932.33 545.760   2
  -1 -21  12 2133.08 342.886   2
   1 -21 -12 1521.23 313.083   3
  -1  21  12 2275.23 424.141   1
   1 -21 -11 2811.74 395.257   3
  -1 -21  11 3695.63 422.307   2
  -1  21  11 3832.33 500.501   1
   1 -21 -10 255.190 225.718   3
  -1 -21  10 283.942 207.674   2
  -1  21   9 524.840 195.805   5
   1 -21  -9 403.015 219.031   3
  -1 -21   9-115.734 196.311   2
  -1  21   8 417.191 195.433   5
   1 -21  -8 237.080 176.967   3
  -1 -21   8 245.694 169.783   2
  -1 -21   7 3253.88 356.940   2
  -1  21   7 3006.97 371.918   5
   1 -21  -7 2776.03 384.605   3
  -1  21   6 283.728 224.403   5
  -1 -21   6 187.386 162.319   2
  -1  21   5 1970.07 326.809   5
  -1 -21   5 3163.59 318.246   2
  -1 -21   4 2934.54 306.091   2
  -1  21   4 2394.26 353.369   5
  -1  21   3 16410.6 869.440   5
   1  21  -3 17738.3 943.662   5
   1 -21  -3 15792.0 694.625   6
  -1  21   2 4818.38 478.573   5
   1 -21  -2 5303.27 390.355   6
   1  21  -2 5367.17 533.308   5
  -1 -21   2 5268.28 347.234   6
  -1 -21   1 13872.3 561.702   6
  -1  21   1 13795.4 808.274   5
   1 -21  -1 14073.3 638.114   6
   1  21  -1 13159.9 804.999   5
  -1 -21   0 784.396 158.896   6
   1 -21   0 465.367 144.687   6
   1  21   0 623.659 240.300   5
   1  21   1 15599.4 868.473   5
  -1 -21  -1 14900.7 592.038   6
   1  21   2 3859.34 456.529   5
   1  21   3 6534.88 563.074   5
   1 -21   3 6658.34 395.093   2
   1 -21   4 9771.35 484.026   2
   1  21   4 8410.12 633.369   5
   1  21   5 9254.33 643.421   5
   1 -21   5 9699.60 509.463   2
   1 -21   6 3236.69 317.256   2
   1  21   6 3362.78 404.128   5
  -1 -21  -6 2648.63 336.539   3
  -1 -21  -7 1975.26 315.503   3
   1 -21   7 1596.17 250.619   2
   1  21   7 1962.04 324.595   5
   1  21   8 5866.50 549.454   1
  -1 -21  -8 5765.92 515.666   3
   1  21   8 5664.88 495.870   5
   1 -21   8 6104.87 457.296   2
   1  21   9 3292.89 420.808   1
   1  21   9 2600.59 349.976   5
   1 -21   9 3428.86 363.639   2
  -1 -21  -9 3596.74 415.462   3
  -1 -21 -10 841.699 265.778   3
   1  21  10 1281.26 330.341   1
  -1 -21 -11 1837.31 328.996   3
   1  21  11 1852.44 354.012   1
   1  21  12 155.638 229.065   1
  -1 -21 -12-14.5951 189.372   3
  -1 -22  12-38.3090 208.957   2
   1 -22 -12-418.436 251.250   3
  -1  22  12 207.469 282.744   1
  -1  22  11 2965.82 453.237   1
   1 -22 -11 2593.39 419.577   3
  -1 -22  11 2677.92 366.062   2
  -1 -22  10 530.836 237.479   2
   1 -22 -10 63.6483 212.654   3
  -1 -22   9 5488.62 469.377   2
   1 -22  -9 4595.91 492.556   3
  -1  22   8 393.186 213.254   5
   1 -22  -8 103.565 187.134   3
  -1 -22   8 431.296 196.507   2
  -1  22   7 2722.22 372.376   5
   1 -22  -7 3061.04 406.558   3
  -1 -22   7 3505.80 364.737   2
  -1  22   6 2227.10 359.739   5
  -1 -22   6 1920.11 281.671   2
  -1 -22   5 1469.15 246.858   2
  -1  22   5 1162.13 261.984   5
  -1  22   4 1031.94 272.249   5
   1  22  -4 911.806 291.633   5
  -1 -22   4 1041.99 201.214   2
  -1  22   3 3499.90 433.853   5
   1 -22  -3 3840.93 350.168   6
   1  22  -3 4296.02 511.010   5
  -1  22   2-59.3314 189.449   5
   1  22  -2 151.287 223.094   5
   1 -22  -2 181.225 149.991   6
  -1  22   1 225.403 238.978   5
   1 -22  -1 514.868 172.654   6
   1  22  -1 77.1409 241.604   5
   1 -22   0 880.728 217.779   6
   1  22   0 426.240 218.003   5
   1  22   1 4406.74 495.633   5
   1  22   2 123.631 206.960   5
   1  22   3 144.232 230.829   5
   1  22   4 472.614 267.642   5
   1  22   5 2209.52 360.440   5
  -1 -22  -6-39.3367 178.811   3
   1  22   6 155.217 188.432   5
  -1 -22  -7 3595.40 414.942   3
   1  22   7 2921.08 392.311   5
   1  22   8 236.709 218.886   1
   1  22   8 226.506 215.108   5
  -1 -22  -8-15.7776 176.484   3
  -1 -22  -9 99.9199 192.390   3
   1  22   9 285.489 254.689   1
   1  22  10-303.697 215.386   1
  -1 -22 -10-132.895 212.325   3
   1  22  11 3824.23 476.763   1
  -1 -22 -11 3130.78 405.523   3
   1 -23 -12 2293.26 383.223   3
   1 -23 -11 2752.20 413.514   3
  -1  23  11 3231.93 467.232   1
   1 -23 -10 404.493 221.573   3
   1 -23  -9 3043.96 418.461   3
   1 -23  -8 3549.42 443.001   3
  -1  23   8 3331.20 393.094   5
  -1  23   7 4116.21 447.283   5
   1 -23  -7 4286.87 470.048   3
  -1  23   6 307.547 214.431   5
  -1  23   5 4082.66 459.787   5
   1  23  -4 366.741 270.383   5
  -1  23   4-23.6952 209.006   5
  -1  23   3 1779.91 328.225   5
   1  23  -3 1847.08 379.461   5
   1  23  -2 2722.28 429.649   5
  -1  23   2 2476.37 402.254   5
   1 -23  -2 2656.80 298.353   6
  -1  23   1 8268.53 655.264   5
   1 -23  -1 6717.83 458.102   6
   1  23  -1 7704.65 648.840   5
  -1  23   0 4829.03 538.702   5
   1 -23   0 4209.37 362.089   6
   1  23   0 4397.97 526.656   5
   1 -23   1 12168.6 612.711   6
   1  23   1 12982.2 827.292   5
   1  23   2 605.431 262.951   5
   1  23   3 7068.15 619.469   5
   1  23   4 3943.23 463.303   5
   1  23   5 14954.2 863.244   5
  -1 -23  -6 1099.63 257.002   3
   1  23   6 1294.77 287.655   5
   1  23   7 5244.06 497.349   5
  -1 -23  -7 3717.72 420.259   3
   1  23   8 2028.86 354.104   1
   1  23   8 1731.53 332.481   5
  -1 -23  -8 2146.95 344.344   3
   1  23   9 3718.99 451.381   1
  -1 -23  -9 5039.37 502.488   3
  -1 -23 -10-382.767 216.999   3
   1  23  10 185.609 211.674   1
   1  23  11 1452.56 359.561   1
   1 -24 -11 565.264 249.174   3
   1 -24 -10 2336.64 373.699   3
   1 -24  -9-11.4581 194.079   3
  -1  24   8 1117.14 288.610   5
   1 -24  -8 1292.68 308.308   3
   1 -24  -7-151.586 211.701   3
  -1  24   7-81.6572 209.551   5
  -1  24   6 3499.69 445.269   5
   1  24  -6 3741.80 506.380   5
   1  24  -5 852.052 312.715   5
  -1  24   5 233.327 212.843   5
   1  24  -4 694.232 277.341   5
  -1  24   4 757.538 239.190   5
   1  24  -3 546.906 266.924   5
  -1  24   3 508.003 255.039   5
  -1  24   2 1345.36 337.079   5
   1  24  -2 1603.40 361.176   5
   1  24  -1 1003.36 304.539   5
  -1  24   1 1241.27 330.338   5
   1  24   0 5756.09 597.633   5
  -1  24   0 5421.71 566.282   5
  -1  24  -1 593.186 297.463   5
   1  24   1 746.856 281.051   5
   1  24   2 26.1355 250.300   5
   1  24   3 390.836 247.539   5
   1  24   4 1080.57 334.093   5
   1  24   5 1527.51 325.785   5
   1  24   6 3942.65 461.493   5
  -1 -24  -6 4077.67 437.135   3
  -1 -24  -7 2.24576 200.520   3
   1  24   7-44.5753 214.261   5
  -1 -24  -8-87.2474 199.624   3
   1  24   8 145.073 199.693   5
  -1 -24  -9 759.754 239.835   3
   1  24   9 728.723 263.536   1
   1  24  10 1695.63 354.176   1
   1 -25 -10 1329.41 299.702   3
   1 -25  -9-422.074 242.047   3
   1 -25  -8 2464.79 394.182   3
  -1  25   7-148.157 220.585   5
   1  25  -7 270.413 258.113   5
   1 -25  -7-204.742 257.629   3
  -1  25   6 2809.35 404.431   5
   1  25  -6 3388.36 491.056   5
   1  25  -5 689.723 297.701   5
  -1  25   5 346.941 218.981   5
   1  25  -4 6149.37 625.869   5
  -1  25   4 6068.19 583.825   5
  -1  25   3 276.844 204.040   5
   1  25  -3 165.024 228.991   5
  -1  25   2 7250.25 649.021   5
   1  25  -2 7257.82 672.138   5
  -1  25   1 196.512 239.567   5
   1  25  -1-90.5282 227.077   5
  -1  25   0 5400.87 571.229   5
   1  25   0 4815.43 544.582   5
  -1  25  -1 277.020 262.542   5
   1  25   1-19.9429 234.458   5
   1  25   2 7480.65 655.416   5
   1  25   3 64.4420 220.592   5
   1  25   4 15510.4 925.256   5
   1  25   5 643.317 253.386   5
   1  25   6 4165.07 481.011   5
  -1 -25  -6 4950.17 481.811   3
  -1 -25  -7 228.652 182.067   3
   1  25   7 506.134 252.486   5
  -1 -25  -8 2530.39 371.711   3
   1  25   8 3246.25 409.082   1
   1  25   9 644.813 265.655   1
   1 -26  -9 1020.76 295.134   3
   1 -26  -8-140.785 230.893   3
   1 -26  -7 337.054 229.629   3
  -1  26   7 658.591 261.715   5
  -1  26   6-24.1567 242.692   5
  -1  26   5 853.474 265.431   5
   1  26  -5 565.498 253.527   5
  -1  26   4 1089.18 299.588   5
   1  26  -4 600.732 299.234   5
  -1  26   3-118.931 227.699   5
   1  26  -3-23.6381 251.369   5
   1  26  -2 2151.95 400.892   5
  -1  26   2 2273.85 390.574   5
   1  26  -1-200.667 277.533   5
  -1  26   1-241.587 227.947   5
  -1  26   0 211.443 225.539   5
   1  26   0 26.4847 232.447   5
  -1  26  -1 1272.13 345.621   5
   1  26   1 1593.85 381.684   5
  -1  26  -2 1622.33 377.996   5
   1  26   2 1865.53 392.768   5
   1  26   3 1259.45 324.377   5
   1  26   4 650.321 285.409   5
   1  26   5 468.936 267.066   5
   1  26   6 2699.14 411.824   5
  -1 -26  -6 2200.82 331.719   3
  -1 -26  -7 796.009 257.761   3
   1  26   7 903.021 293.923   5
   1  26   8 649.122 274.472   1
   1  26   9-427.242 315.502   1
   1 -27  -7 1828.35 339.697   3
  -1  27   6 578.249 261.743   5
  -1  27   5 2008.85 386.542   5
  -1  27   4 3233.52 463.211   5
   1  27  -3 2234.00 416.886   5
  -1  27   3 2441.45 434.159   5
   1  27  -2 3430.20 528.338   5
  -1  27   2 3418.01 485.143   5
  -1  27   1 1682.25 360.722   5
   1  27  -1 1643.40 354.005   5
  -1  27   0 2711.77 447.170   5
   1  27   0 2876.74 448.840   5
   1  27   1 4183.81 540.763   5
  -1  27  -1 3281.49 475.793   5
   1  27   2 1805.21 393.620   5
  -1  27  -2 2325.18 422.012   5
   1  27   3 1932.92 410.526   5
   1  27   4 1372.31 343.075   5
   1  27   5 8197.72 693.337   5
   1  27   6 556.590 278.967   5
  -1 -27  -6 338.699 242.335   3
  -1  28   6-371.971 323.460   5
  -1  28   5 2164.11 394.013   5
  -1  28   4 3489.72 494.658   5
  -1  28   3 232.871 231.116   5
  -1  28   2 99.9495 268.174   5
  -2   0  18-54.4503 245.803   1
  -2   0  17 153.946 239.693   1
  -2   0  16 1932.01 377.173   1
  -2   0  15 112.033 202.525   1
  -2   0  14 2758.51 398.266   1
  -2   0  13-173.602 186.182   1
  -2   0  12-123.275 205.979   1
   2   0 -12-102.367 68.6903   5
  -2   0  11 30.2906 56.7212   4
   2   0 -11-24.6663 57.9126   5
  -2   0  10 29.4805 146.113   1
   2   0 -10 244.277 61.9103   5
  -2   0   9-145.618 168.710   1
   2   0  -9-17.2993 55.2241   5
   2   0  -8 2795.18 146.111   5
  -2   0   8 3573.35 307.542   1
  -2   0   7 82.0517 127.131   1
  -2   0   6 5375.26 203.793   4
  -2   0   6 6229.03 325.950   3
  -2   0   6 5828.67 332.102   1
  -2   0   5-174.907 96.0720   1
  -2   0   5 61.5526 53.0204   4
  -2   0   5-64.0533 81.2430   3
  -2   0   4 659.075 104.316   1
  -2   0   4 525.461 97.7233   3
   2   0  -4 608.146 122.989   3
  -2   0   4 626.348 75.0459   4
   2   0  -3 14.2186 77.0360   3
   2   0  -3 107.304 81.4823   4
  -2   0   3 34.7167 48.7574   4
  -2   0   3 19.8020 61.7626   3
  -2   0  -1 26.0378 73.9605   5
  -2   0  -1-40.2880 60.8881   1
   2   0   1-60.7818 74.5572   1
   2   0   1 1.27290 80.1968   5
   2   0   2 89920.1 1457.79   5
   2   0   2 90516.3 1478.04   1
  -2   0  -2 89149.7 1446.84   1
  -2   0  -2 91928.0 1448.72   5
  -2   0  -3-33.3182 81.5018   5
  -2   0  -3-17.0800 81.3736   1
   2   0   3-4.50433 107.024   1
   2   0   4 70037.6 1386.52   1
  -2   0  -4 71780.1 1340.22   1
  -2   0  -4 70350.6 1276.38   5
  -2   0  -5-66.4170 107.918   5
   2   0   5-21.5071 132.701   1
  -2   0  -6 2079.37 193.150   5
   2   0   6 2039.10 245.216   1
   2   0   7-52.8188 156.442   1
  -2   0  -7 13.2465 90.4910   5
   2   0   8 12410.7 636.470   1
   2   0   9-84.5165 197.128   1
   2   0  10 9405.86 649.536   1
   2   0  11 70.1631 218.215   1
   2   0  12 1674.75 351.244   1
   2   0  13-60.8867 231.144   1
   2   0  14 4644.90 561.290   1
   2   0  15 266.032 266.245   1
   2   0  16 2654.83 439.705   1
  -2   1  18 4189.13 567.905   1
  -2  -1  18 4374.79 571.881   1
  -2  -1  17-292.419 268.643   1
  -2   1  17-147.633 233.182   1
  -2   1  16 2694.50 420.103   1
  -2  -1  16 3268.82 479.431   1
  -2  -1  15 1343.56 322.111   1
  -2   1  15 1586.88 355.060   1
  -2   1  14 3321.90 427.011   1
  -2  -1  14 3372.75 419.717   1
  -2   1  13 540.083 216.619   1
  -2  -1  13 422.533 205.946   1
  -2   1  12 19503.8 877.216   1
   2  -1 -12 18049.9 436.620   5
   2   1 -12 19933.5 514.072   5
  -2  -1  12 19582.6 873.151   1
  -2  -1  11 10579.7 305.058   4
   2   1 -11 12053.2 383.060   5
  -2   1  11 12627.0 681.978   1
  -2  -1  11 12528.4 669.816   1
   2  -1 -11 12015.3 329.918   5
  -2  -1  10 16126.3 710.702   1
  -2  -1  10 14002.6 359.014   4
   2   1 -10 16167.4 437.807   5
  -2   1  10 15213.8 693.718   1
   2  -1 -10 14997.4 369.523   5
  -2  -1   9 11355.5 565.183   1
  -2   1   9 11297.2 561.798   1
  -2  -1   9 10308.0 287.527   4
   2  -1  -9 10020.4 276.316   5
  -2  -1   8 16905.6 377.561   4
   2  -1  -8 16688.3 361.621   5
  -2  -1   8 18332.3 670.074   1
  -2   1   8 18589.4 680.310   1
   2  -1  -7 11602.9 263.377   5
  -2  -1   7 12120.0 502.108   1
   2   1  -7 12383.7 466.631   1
  -2   1   7 12984.2 544.675   1
  -2  -1   7 11414.7 287.281   4
  -2   1   6 60841.7 1213.74   1
   2   1  -6 63033.6 1157.35   1
  -2   1   6 61542.8 1192.54   3
  -2  -1   6 61883.8 1193.40   3
  -2  -1   6 61139.8 1194.14   1
   2  -1  -6 61831.2 1231.03   3
  -2  -1   5 3138.30 209.435   3
   2  -1  -5 2578.22 217.079   3
  -2  -1   5 2822.06 121.840   4
  -2   1   5 2536.62 217.799   1
  -2  -1   5 2913.83 201.656   1
  -2   1   5 3235.41 222.786   3
  -2  -1   4 30697.8 527.809   4
  -2  -1   4 32342.1 675.925   3
  -2   1   4 29903.9 587.449   4
  -2   1   4 31823.0 686.600   3
   2  -1  -4 32178.1 703.433   3
  -2  -1   4 31054.0 641.517   1
   2   1  -4 29534.3 517.683   4
  -2   1   3 19861.3 457.101   3
   2   1  -3 18392.7 364.616   4
  -2  -1   3 18056.2 369.445   4
  -2   1   3 17059.4 400.401   4
  -2   1   3 17987.3 443.838   6
   2   1  -3 18438.8 361.348   5
  -2  -1   3 17860.9 426.958   3
  -2  -1   3 18262.8 396.187   1
   2  -1  -3 19489.6 463.242   3
  -2   1   2 897.354 64.1308   5
  -2   1   2 662.774 85.1387   4
   2  -1  -2 637.310 88.4164   4
  -2   1   2 594.846 78.5600   6
   2  -1  -2 684.040 91.5260   6
   2  -1  -2 998.145 92.3571   3
  -2   1  -1 47097.8 840.749   5
   2  -1   1 48109.4 853.553   1
   2   1   1 47994.7 812.015   1
   2  -1   1 46090.7 811.288   4
  -2   1  -1 44894.0 829.762   1
  -2  -1  -1 44714.8 794.526   1
  -2  -1  -1 47210.3 835.892   5
   2   1   2 707.847 119.505   1
   2   1   2 708.682 122.156   5
  -2  -1  -2 663.711 101.895   1
  -2   1  -2 751.508 119.468   1
  -2  -1  -2 703.035 106.388   5
   2  -1   2 722.465 132.662   1
  -2   1  -2 671.611 114.428   5
  -2  -1  -3 17848.9 517.797   1
  -2   1  -3 17438.9 526.166   1
   2   1   3 17900.5 515.632   5
  -2   1  -3 18686.4 505.556   5
   2   1   3 19033.4 549.653   1
   2  -1   3 17324.6 568.988   1
  -2  -1  -3 19480.8 506.099   5
   2   1   4 1650.94 169.856   5
  -2  -1  -4 1690.53 175.556   1
  -2  -1  -4 1773.19 160.504   5
   2   1   4 1412.88 194.433   1
  -2   1  -4 1945.61 174.827   5
  -2   1  -4 1491.71 176.770   1
   2  -1   4 1937.67 211.612   1
  -2  -1  -5 2949.25 212.318   5
  -2   1  -5 2860.46 218.269   5
   2  -1   5 2560.66 261.204   1
   2   1   5 2920.11 279.164   1
   2   1   5 2537.13 197.757   3
   2  -1   6 19071.6 713.964   1
   2   1   6 19537.4 717.397   1
  -2  -1  -6 19040.3 566.349   5
  -2   1  -6 19523.8 590.763   5
   2  -1   7 206.424 150.456   1
  -2   1  -7 144.310 91.0192   5
   2   1   7 187.984 163.843   1
  -2  -1  -7 12.2385 104.207   5
   2  -1   8 17896.2 775.625   1
   2   1   8 17733.3 774.681   1
   2   1   9 1299.88 272.725   1
   2  -1   9 1435.87 313.973   1
   2  -1  10 17444.8 865.420   1
   2   1  10 19828.8 893.013   1
   2  -1  11 8425.18 642.115   1
   2   1  11 7835.62 618.631   1
   2  -1  12 9304.95 676.871   1
   2   1  12 9313.24 690.093   1
   2   1  13-143.292 230.024   1
   2  -1  13 93.4696 258.323   1
   2   1  14 2763.17 458.062   1
   2  -1  14 2190.40 420.074   1
   2   1  15 1231.53 347.401   1
   2  -1  15 825.536 315.445   1
   2   1  16 293.927 284.592   1
   2  -1  16 5.03995 267.644   1
  -2  -2  18 172.926 268.987   1
  -2   2  18-172.992 258.541   1
  -2  -2  17 664.745 315.391   1
  -2   2  17-197.132 249.754   1
  -2  -2  16-425.993 265.161   1
  -2   2  16-185.265 239.501   1
  -2   2  15 435.101 269.757   1
  -2  -2  15-72.9651 223.217   1
  -2   2  14 529.516 245.764   1
  -2  -2  14 451.763 225.346   1
  -2  -2  13 942.476 272.749   1
  -2   2  13 1001.10 271.030   1
  -2  -2  12 12355.2 699.325   1
  -2   2  12 12638.5 721.132   1
   2   2 -12 12336.3 416.653   5
  -2   2  11 3198.53 363.001   1
   2   2 -11 2816.02 194.272   5
   2  -2 -11 2462.71 129.864   5
  -2  -2  11 3025.97 348.596   1
  -2  -2  10 4671.33 387.418   1
  -2  -2  10 3328.17 119.166   4
   2  -2 -10 3794.11 154.029   5
  -2   2  10 4232.28 390.719   1
  -2   2   9 6778.36 445.883   1
   2  -2  -9 5792.67 180.138   5
  -2  -2   9 6650.54 426.544   1
  -2  -2   8 7679.85 427.958   1
  -2   2   8 6600.84 424.260   1
  -2  -2   7 967.703 62.0361   4
   2   2  -7 1329.52 172.128   1
  -2  -2   7 881.555 174.780   1
   2  -2  -7 1353.12 210.833   3
  -2   2   7 1316.78 205.305   1
   2   2  -6 1589.97 163.858   1
   2  -2  -6 1737.44 200.644   3
  -2   2   6 1304.35 183.007   1
  -2  -2   6 1326.78 148.861   1
  -2   2   6 1709.41 179.503   3
  -2   2   5 162.461 103.831   3
   2  -2  -5 129.245 119.204   3
   2   2  -5 226.412 85.5421   1
  -2  -2   5 9.43972 106.018   1
  -2   2   4 57055.2 1077.52   6
   2   2  -4 58842.7 987.954   1
   2  -2  -4 58615.4 1098.93   3
  -2   2   4 60554.8 1089.71   3
   2  -2  -3 18284.5 467.381   3
  -2  -2   3 16998.4 365.351   1
  -2   2   3 17212.0 422.871   4
  -2   2   3 17637.7 453.322   6
   2   2  -3 17883.0 352.916   4
   2   2  -3 17366.2 392.057   5
   2   2  -3 17094.6 366.907   1
   2  -2  -3 17417.5 463.305   6
   2   2  -2 62283.8 976.017   2
  -2  -2   2 58324.8 944.440   5
  -2  -2   2 56618.5 982.517   2
   2   2  -2 60678.1 953.089   5
   2  -2  -2 56751.5 986.982   4
  -2  -2   1 43250.2 750.286   5
   2   2  -1 43270.1 758.317   5
   2   2   0 673.198 62.7558   1
   2  -2   0 508.967 95.3177   1
   2  -2   0 797.963 97.7884   4
  -2  -2   0 607.449 58.6713   1
  -2  -2   0 527.213 88.2896   5
  -2   2   0 508.951 83.3794   4
   2   2   0 726.274 101.047   5
  -2   2   0 457.706 94.7670   1
  -2   2  -1 55461.8 970.178   1
   2  -2   1 54935.5 918.793   4
   2   2   1 53768.6 900.402   1
   2   2   1 54853.9 965.784   5
  -2  -2  -1 54266.3 946.282   5
  -2  -2  -1 54262.4 891.484   1
   2  -2   1 55042.5 986.176   1
  -2   2  -1 54451.2 912.433   4
   2   2   1 53418.6 799.288   3
   2  -2   2 2363.26 196.985   1
   2   2   2 2477.15 175.282   1
  -2   2  -2 1977.97 169.225   1
   2   2   2 2343.00 134.720   3
  -2  -2  -2 2318.95 159.794   1
   2  -2   2 2279.70 150.425   4
   2   2   2 2346.84 177.637   5
  -2  -2  -2 2259.59 164.454   5
  -2  -2  -3 15012.9 460.188   1
   2   2   3 14851.7 484.679   1
  -2  -2  -3 15440.2 451.211   5
   2   2   3 14409.4 461.642   5
   2   2   3 14758.2 408.101   3
   2  -2   3 14687.5 395.997   4
   2  -2   3 14748.8 511.444   1
  -2   2  -3 15500.0 487.389   1
  -2  -2  -4 72364.1 1266.58   5
   2   2   4 70187.2 1297.43   5
  -2  -2  -4 67684.9 1314.88   1
  -2   2  -4 71586.6 1356.85   1
   2   2   4 71271.2 1372.92   1
   2  -2   4 72122.2 1414.92   1
   2   2   4 70350.3 1247.63   3
   2  -2   4 70395.1 1177.95   4
   2  -2   5 3133.99 282.770   1
  -2  -2  -5 2909.92 214.405   5
   2   2   5 2480.81 199.682   3
   2   2   5 2915.99 267.125   1
   2   2   5 2555.43 219.352   5
   2  -2   5 2464.04 174.123   4
   2  -2   6 835.470 209.688   1
   2  -2   6 781.251 115.600   4
  -2  -2  -6 1034.88 145.535   5
  -2   2  -6 737.513 136.824   5
   2   2   6 946.826 204.840   1
   2  -2   7 21391.2 567.271   4
   2   2   7 21137.1 805.174   1
  -2  -2  -7 21870.1 624.226   5
   2  -2   7 21513.6 827.823   1
  -2  -2  -8 8032.26 368.183   5
   2   2   8 7829.96 515.477   1
   2  -2   8 7114.75 509.049   1
   2  -2   8 7105.21 315.333   4
   2  -2   9 45057.4 1371.84   1
   2  -2   9 44774.6 952.693   4
   2   2   9 47679.3 1389.97   1
   2  -2  10 1123.36 273.933   1
   2  -2  10 909.414 142.919   4
   2   2  10 785.354 282.046   1
   2   2  11 565.983 215.789   1
   2  -2  11 126.739 215.849   1
   2  -2  11 548.473 120.609   4
   2   2  12 767.732 260.460   1
   2  -2  12 1143.22 286.303   1
   2   2  13 846.398 294.435   1
   2  -2  13 1365.57 346.945   1
   2  -2  14 3191.01 477.136   1
   2   2  14 2308.51 419.901   1
   2   2  15-606.389 289.642   1
   2  -2  15 18.2940 227.194   1
   2   2  16 746.931 316.475   1
   2  -2  16 1184.64 353.077   1
  -2   3  18 394.898 282.939   1
  -2  -3  18 304.376 248.214   1
  -2  -3  17 2675.83 424.503   1
  -2   3  17 1613.25 368.381   1
  -2   3  16 226.396 225.036   1
  -2  -3  16 873.959 491.291   1
  -2   3  15 8295.30 680.070   1
  -2  -3  15 8434.38 662.245   1
  -2  -3  14 414.391 246.406   1
  -2   3  14 264.299 221.024   1
  -2  -3  13 41322.6 1364.48   1
  -2   3  13 40235.2 1394.58   1
  -2   3  12 325.158 216.501   1
  -2  -3  12 83.3488 181.313   1
   2  -3 -11 2163.38 111.121   5
  -2  -3  11 3136.85 344.272   1
  -2   3  11 2904.51 342.385   1
  -2  -3  10 1563.62 243.821   1
   2  -3 -10 1111.46 78.1712   5
  -2   3  10 1410.07 245.957   1
  -2  -3   9 15738.1 657.995   1
  -2   3   9 18137.2 727.220   1
   2  -3  -8 1583.18 215.476   3
  -2   3   8 1647.40 235.304   1
  -2  -3   8 1609.13 232.787   1
   2   3  -7 45589.4 990.783   1
  -2  -3   7 43144.0 1036.33   1
  -2   3   7 42265.0 1095.52   1
   2  -3  -7 45455.2 1102.94   3
  -2   3   6 6896.43 349.511   3
   2  -3  -6 6616.13 372.817   3
  -2  -3   6 7233.26 336.537   1
   2   3  -6 7272.08 323.581   1
  -2   3   5 44186.6 927.861   3
  -2   3   5 40849.6 905.548   6
  -2  -3   5 41364.8 853.219   1
   2  -3  -5 39947.4 931.127   3
   2   3  -5 42224.5 832.897   1
   2   3  -4 3292.58 123.437   4
   2  -3  -4 3150.41 227.883   3
  -2   3   4 3572.63 222.629   6
  -2  -3   4 1985.66 142.595   1
   2   3  -4 3303.67 172.746   1
   2   3  -3 25785.9 476.162   1
  -2   3   3 26468.0 597.782   6
  -2  -3   3 24777.5 585.906   2
  -2  -3   3 25820.5 484.007   1
   2  -3  -3 24442.4 603.559   6
  -2   3   2 136348. 2000.61   4
   2  -3  -2 135937. 2015.28   6
  -2  -3   2 138464. 1970.02   5
  -2  -3   2 134160. 1999.50   2
   2   3  -2 136662. 1982.85   2
   2   3  -2 138068. 1989.00   5
   2   3  -1 5616.21 224.292   2
   2   3  -1 5667.98 236.882   5
  -2  -3   1 5219.89 243.335   2
   2  -3  -1 5869.04 245.886   4
  -2   3   1 5554.55 238.638   4
  -2  -3   1 5806.70 230.814   5
  -2   3   0 14.8068 73.5726   1
  -2   3   0 38.0851 72.0030   4
   2   3   0 162.898 91.6513   5
  -2  -3   0 92.9685 76.6582   5
   2   3   0 109.739 47.6700   1
   2  -3   0 136.946 82.5131   4
  -2   3  -1 8219.53 275.951   4
  -2  -3  -1 8448.16 257.344   1
   2   3   1 7840.83 302.994   5
  -2   3  -1 7999.56 313.676   1
   2  -3   1 7827.09 319.229   1
  -2  -3  -1 8338.29 212.191   3
  -2  -3  -1 8034.41 294.746   5
   2   3   1 8390.90 264.344   1
   2  -3   1 7866.49 276.664   4
  -2  -3  -2 2468.01 173.817   5
  -2   3  -2 2143.66 138.380   4
  -2  -3  -2 2144.31 138.657   3
  -2   3  -2 2061.97 177.089   1
   2  -3   2 1979.13 143.741   4
   2  -3   2 2265.37 200.868   1
   2   3   2 2090.96 170.506   5
   2   3   2 2094.95 132.220   3
  -2  -3  -2 2364.32 164.722   1
   2   3   2 2110.34 166.511   1
  -2  -3  -3 27456.4 641.568   5
   2  -3   3 26726.3 583.218   4
   2   3   3 27454.4 689.899   1
   2   3   3 27212.3 672.204   5
  -2   3  -3 27567.6 707.761   1
   2  -3   3 27275.3 739.429   1
   2   3   3 27574.7 596.215   3
  -2  -3  -3 27969.2 665.388   1
  -2  -3  -4 5296.83 297.221   1
  -2  -3  -4 5204.51 264.323   5
   2  -3   4 5051.79 343.260   1
   2  -3   4 4988.30 226.672   4
   2   3   4 5082.61 289.846   5
   2   3   4 5039.14 308.568   1
   2   3   4 5270.36 259.566   3
  -2   3  -4 4942.67 302.750   1
   2   3   5 91042.0 1630.26   5
   2   3   5 92928.3 1586.74   3
  -2  -3  -5 91846.8 1560.18   5
   2   3   5 90484.8 1736.00   1
   2  -3   5 90015.6 1457.88   4
   2   3   6 1684.79 196.874   5
   2  -3   6 1303.24 128.734   4
  -2  -3  -6 1314.73 150.923   5
   2  -3   6 1293.16 225.545   1
   2   3   6 1592.46 242.513   1
  -2  -3  -7 15840.4 517.485   5
   2   3   7 15915.0 691.770   1
   2  -3   7 15519.9 447.479   4
   2  -3   7 15765.6 695.056   1
   2   3   8 3565.53 358.769   1
   2  -3   8 3543.75 373.869   1
  -2  -3  -8 3515.87 239.257   5
   2  -3   8 3395.93 204.039   4
   2  -3   9 36711.7 1209.42   1
   2  -3   9 33667.5 749.375   4
   2   3   9 35793.9 1194.68   1
   2   3  10 971.348 269.525   1
   2  -3  10 602.313 106.402   4
   2  -3  10 498.662 230.232   1
   2  -3  11 12877.5 766.589   1
   2   3  11 12370.0 750.398   1
   2  -3  11 10919.6 378.990   4
   2   3  12 792.249 270.366   1
   2  -3  12 661.847 267.240   1
   2   3  13 1223.81 307.405   1
   2  -3  13 1390.30 326.900   1
   2  -3  14 80.9327 221.163   1
   2   3  14-59.4061 234.744   1
   2  -3  15 3034.39 496.342   1
   2   3  15 2544.11 442.584   1
   2   3  16 213.596 287.268   1
   2  -3  16 156.598 288.583   1
  -2  -4  18 454.268 291.739   1
  -2   4  18 105.032 255.260   1
  -2   4  17-33.6252 264.594   1
  -2  -4  17 96.0707 234.398   1
  -2  -4  16-514.622 267.618   1
  -2   4  16-229.724 249.387   1
  -2  -4  15 682.088 260.017   1
  -2   4  15 1196.74 312.092   1
  -2   4  14 164.454 219.041   1
  -2  -4  14-53.5341 223.994   1
  -2  -4  13 4764.69 458.312   1
  -2   4  13 4152.14 465.280   1
  -2  -4  12 270.417 178.944   1
  -2   4  12 271.181 181.835   1
  -2   4  11 1120.27 257.283   1
  -2  -4  11 1059.36 228.756   1
   2  -4 -11 588.447 57.9897   5
   2  -4 -10 1121.30 76.8507   5
  -2  -4  10 1944.05 259.651   1
  -2   4  10 1489.72 256.377   1
   2  -4  -9 11255.2 570.129   3
  -2  -4   9 12074.0 570.693   1
  -2   4   9 11670.6 591.079   1
   2  -4  -8 2339.63 265.427   3
  -2   4   8 2173.23 265.311   1
  -2  -4   8 2107.24 240.058   1
  -2   4   7 184.825 42.1043   5
   2  -4  -7 175.794 158.212   3
  -2  -4   7 210.039 141.447   1
  -2   4   7 232.013 153.651   1
   2   4  -7 173.142 100.288   1
  -2  -4   6 80.4974 114.482   1
   2   4  -6-51.0775 86.1611   1
  -2   4   6 144.023 51.5418   5
  -2   4   5 8866.31 228.124   5
  -2  -4   5 10379.8 370.679   1
  -2   4   5 9972.03 403.893   6
   2   4  -5 10208.4 349.200   1
   2  -4  -5 9943.66 431.429   3
  -2  -4   4 8108.08 285.092   1
  -2   4   4 8428.19 346.408   6
   2  -4  -4 8461.02 369.176   3
   2   4  -4 8532.58 278.797   1
  -2  -4   3 47191.5 942.213   2
  -2   4   3 52087.1 958.121   6
   2  -4  -3 49299.6 968.825   6
  -2  -4   3 49311.3 807.115   1
   2   4  -3 49569.4 796.694   1
  -2  -4   2 14745.5 291.480   1
   2   4  -2 15258.2 289.672   1
  -2  -4   2 15661.5 434.399   2
   2   4  -2 15321.0 413.678   2
   2   4  -2 15889.3 440.690   5
  -2  -4   1 108487. 1645.53   5
   2   4  -1 106354. 1661.77   5
  -2  -4   1 102064. 1630.32   2
   2   4  -1 104604. 1603.04   2
  -2   4   1 109693. 1643.22   4
  -2   4   0 174.287 80.8650   4
  -2   4   0 214.045 96.0769   1
   2   4   0 103.040 92.9301   5
  -2  -4   0 74.1804 86.0387   5
   2   4   1 80776.5 1405.56   5
  -2  -4  -1 83650.4 1385.53   5
   2   4   1 83508.9 1297.30   1
  -2   4  -1 88470.0 1350.36   4
   2  -4   1 83353.6 1350.08   4
  -2   4  -1 85714.1 1434.55   1
   2  -4   1 84267.2 1447.50   1
   2   4   2 3340.91 205.608   1
  -2   4  -2 4125.79 248.342   1
   2  -4   2 3891.61 202.011   4
  -2  -4  -2 3735.84 182.515   3
   2  -4   2 3868.76 258.632   1
  -2   4  -2 3919.92 194.539   4
   2   4   2 3795.45 231.345   5
  -2  -4  -2 4216.18 224.225   5
   2  -4   3 78695.4 1501.72   1
   2  -4   3 80128.7 1287.83   4
  -2  -4  -3 80491.0 1367.57   5
  -2   4  -3 79887.7 1280.06   4
  -2  -4  -3 78292.9 1319.62   3
   2   4   3 78371.9 1419.60   1
  -2   4  -3 79494.0 1447.81   1
   2   4   3 80993.7 1307.58   3
   2   4   3 79190.6 1411.57   5
   2   4   4 7484.19 314.187   3
   2   4   4 7439.40 350.756   5
   2   4   4 7300.08 376.538   1
  -2  -4  -4 7590.95 325.229   5
   2  -4   4 7414.34 392.419   1
   2  -4   4 7220.10 273.873   4
  -2   4  -4 7583.52 373.569   1
  -2  -4  -4 7248.82 322.051   3
   2  -4   5 93109.3 1806.52   1
  -2  -4  -5 91653.5 1569.16   5
   2   4   5 93492.7 1650.62   5
   2  -4   5 89261.1 1442.45   4
   2   4   5 93721.5 1600.17   3
   2   4   5 88905.2 1745.87   1
   2   4   6 17919.8 688.501   1
   2  -4   6 17745.5 465.057   4
  -2  -4  -6 18341.4 550.949   5
   2  -4   6 17702.9 709.885   1
   2   4   6 17762.9 596.493   5
   2  -4   7 20138.0 789.791   1
   2   4   7 18201.1 733.997   1
  -2  -4  -7 18761.3 566.738   5
   2  -4   7 17616.6 471.158   4
   2   4   7 17683.3 614.915   5
   2  -4   8 5168.01 237.342   4
   2   4   8 5909.98 441.170   1
   2  -4   8 4820.88 426.300   1
   2   4   9 533.057 216.877   1
   2  -4   9 234.943 175.708   1
   2  -4   9 379.379 87.7546   4
   2  -4  10 619.294 234.364   1
   2   4  10-37.2011 188.140   1
   2  -4  10 291.166 80.0075   4
   2  -4  11 8035.33 613.986   1
   2   4  11 6879.24 576.472   1
   2  -4  12 407.599 238.168   1
   2   4  12 851.537 261.366   1
   2  -4  13 1966.91 345.923   1
   2   4  13 1708.10 350.649   1
   2  -4  14 354.645 277.602   1
   2   4  14-174.985 246.219   1
   2   4  15 617.844 297.377   1
   2  -4  15 779.676 326.158   1
   2  -4  16 86.0739 254.371   1
   2   4  16 333.157 297.588   1
  -2  -5  18 3105.87 482.489   1
  -2   5  18 2151.30 421.989   1
  -2   5  17 1784.19 415.601   1
  -2  -5  17 1898.82 372.116   1
  -2   5  16 2323.80 410.968   1
  -2  -5  16 1938.94 381.506   1
  -2  -5  15 2711.30 402.436   1
  -2   5  15 2757.54 415.512   1
  -2  -5  14 4294.64 493.074   1
  -2   5  14 5432.41 537.167   1
  -2  -5  13 4195.96 437.141   1
  -2   5  13 4216.61 472.650   1
  -2  -5  12 2533.97 348.509   1
  -2   5  12 2458.24 388.988   1
  -2  -5  11 1166.76 227.192   1
  -2   5  11 779.082 228.494   1
  -2   5  10 15678.3 745.396   1
  -2  -5  10 17221.9 729.106   1
   2  -5 -10 16098.8 730.458   3
  -2   5   9 3335.65 341.841   1
  -2  -5   9 3310.88 314.175   1
   2  -5  -9 3421.44 330.477   3
  -2   5   8 8263.61 239.313   5
  -2   5   8 9364.38 517.238   1
  -2  -5   8 9358.65 466.429   1
   2  -5  -8 9342.09 504.537   3
   2   5  -7 19953.8 595.821   1
  -2   5   7 18583.0 399.787   5
   2  -5  -7 19313.8 689.974   3
  -2  -5   7 19490.8 647.562   1
  -2   5   6 41011.3 693.026   5
  -2  -5   6 40041.9 928.356   1
   2  -5  -6 40348.9 1008.92   3
   2   5  -6 40700.6 879.034   1
  -2   5   5 4311.98 177.116   5
   2  -5  -5 4335.16 306.888   3
  -2  -5   5 4329.39 238.296   1
   2   5  -5 3879.22 215.409   1
  -2   5   5 4189.25 276.451   6
   2  -5  -4 66174.3 1282.55   6
  -2  -5   4 65961.9 1135.83   1
  -2   5   4 69799.6 1258.15   6
   2   5  -4 66069.4 1106.07   1
   2  -5  -3 8308.89 353.428   6
  -2  -5   3 8499.81 346.726   2
   2   5  -3 8440.37 253.279   1
  -2  -5   3 8204.97 268.629   1
   2   5  -2 33323.1 722.837   2
  -2  -5   2 34876.2 745.871   2
   2   5  -2 35167.3 586.337   1
   2   5  -2 35926.0 777.885   5
   2   5  -1 102961. 1633.12   2
   2   5  -1 109626. 1716.27   5
  -2  -5   1 103745. 1657.31   2
   2   5   0 1212.04 156.379   5
   2   5   0 1241.09 134.321   2
   2   5   0 1296.92 70.2209   6
  -2   5   0 1129.88 130.236   4
  -2  -5   0 1451.61 146.362   5
  -2   5   0 1244.53 139.737   1
  -2   5  -1 25943.0 657.710   1
  -2  -5  -1 25232.2 620.119   5
   2  -5   1 25807.3 671.278   1
  -2   5  -1 25501.9 581.217   4
   2   5   1 24119.8 638.318   5
  -2   5  -2 39190.3 865.963   1
  -2   5  -2 38534.5 752.246   4
   2  -5   2 36104.9 752.777   4
   2   5   2 36592.3 834.927   5
  -2  -5  -2 38533.3 807.355   5
  -2  -5  -2 36181.1 721.781   3
   2   5   2 37645.6 790.273   1
   2  -5   2 38217.0 895.466   1
  -2   5  -3 90937.2 1610.21   1
  -2   5  -3 91470.4 1432.43   4
   2   5   3 88051.5 1561.02   1
   2  -5   3 89636.3 1435.07   4
  -2  -5  -3 86815.4 1459.98   3
   2   5   3 87780.3 1563.20   5
  -2  -5  -3 91771.3 1526.05   5
   2  -5   4 13179.3 548.230   1
  -2  -5  -4 13312.8 444.942   5
   2   5   4 13510.6 439.049   3
   2  -5   4 13511.5 392.411   4
  -2  -5  -4 12934.9 451.176   3
   2   5   4 13601.5 493.682   5
  -2   5  -4 13289.8 388.366   4
   2   5   4 13581.1 514.478   1
   2  -5   5 1171.44 221.511   1
   2   5   5 899.498 185.835   1
  -2  -5  -5 828.635 133.344   5
   2  -5   5 997.723 113.421   4
  -2  -5  -5 1101.79 165.381   3
   2   5   5 713.342 147.177   5
   2   5   5 886.686 141.276   3
   2   5   6 21859.8 781.013   1
   2  -5   6 22911.8 818.070   1
   2   5   6 22974.1 706.527   5
  -2  -5  -6 22774.1 631.934   5
   2  -5   6 21939.6 524.524   4
   2  -5   7 2824.48 176.932   4
  -2  -5  -7 2692.98 212.243   5
   2  -5   7 3156.17 339.068   1
   2   5   7 2858.92 255.609   5
   2   5   7 2956.55 314.414   1
   2  -5   8 10821.9 340.228   4
   2  -5   8 11797.4 640.824   1
   2   5   8 11413.0 503.863   5
   2   5   8 11598.3 631.141   1
   2  -5   9 1701.61 295.099   1
   2   5   9 1416.14 258.691   1
   2  -5   9 1641.95 127.360   4
   2  -5  10 7815.23 264.725   4
   2   5  10 9250.28 640.179   1
   2  -5  10 10047.8 650.013   1
   2   5  11 3200.30 412.021   1
   2  -5  11 3083.12 412.039   1
   2   5  12 3237.27 427.930   1
   2  -5  12 3180.09 425.679   1
   2  -5  13 1588.07 333.924   1
   2   5  13 1970.62 366.214   1
   2   5  14 1533.82 381.112   1
   2  -5  14 1302.93 331.709   1
   2  -5  15 144.716 233.164   1
   2   5  15 402.700 288.823   1
   2  -5  16 261.757 279.801   1
   2   5  16 605.569 320.038   1
  -2  -6  18-218.624 275.456   1
  -2   6  18 373.553 272.050   1
  -2  -6  17-181.776 225.068   1
  -2   6  17-381.439 321.528   1
  -2  -6  16 460.497 254.030   1
  -2   6  16 737.203 297.349   1
  -2   6  15 1380.86 344.949   1
  -2  -6  15 1446.99 325.511   1
  -2   6  14 246.135 241.579   1
  -2  -6  14 91.1569 213.428   1
  -2   6  13 142.597 223.218   1
  -2  -6  13 315.988 213.854   1
  -2   6  12-42.4276 194.800   1
  -2  -6  12 159.838 179.109   1
  -2   6  11 4160.49 438.743   1
  -2  -6  11 4571.37 415.715   1
   2  -6 -11 5485.59 455.096   3
  -2   6  10 4778.77 430.947   1
  -2  -6  10 5215.13 408.198   1
   2  -6 -10 4351.43 395.192   3
  -2   6   9 49.0507 49.6302   5
  -2  -6   9 412.615 158.697   1
   2  -6  -9 167.408 157.422   3
  -2   6   9 112.116 155.447   1
   2  -6  -8 3715.26 340.705   3
  -2  -6   8 4665.19 337.029   1
  -2   6   8 3714.51 172.214   5
  -2   6   7 2530.59 146.086   5
  -2  -6   7 2602.64 256.549   1
   2   6  -7 2545.91 218.588   1
   2  -6  -7 2418.14 269.685   3
   2  -6  -6 11923.7 521.901   3
   2   6  -6 12464.4 433.061   1
  -2   6   6 11522.8 332.657   5
  -2  -6   6 11442.0 460.679   1
   2   6  -5 3897.82 223.362   1
  -2  -6   5 4009.71 245.070   1
   2  -6  -5 3275.23 277.630   3
  -2   6   5 4078.18 197.188   5
  -2   6   5 3456.31 259.532   6
   2   6  -4 99366.6 1536.00   1
  -2  -6   4 95803.4 1694.61   2
  -2  -6   4 99544.0 1572.69   1
  -2   6   4 99877.6 1693.13   6
   2  -6  -3 65677.2 1258.44   6
  -2  -6   3 64896.7 1232.60   2
  -2  -6   3 66896.3 1086.98   1
   2   6  -3 68209.9 1073.23   1
   2   6  -2 19286.7 569.190   5
  -2  -6   2 18518.0 526.832   2
   2   6  -2 17989.8 407.889   1
   2   6  -2 18725.8 509.483   2
   2   6  -1 828.880 148.929   5
  -2  -6   1 991.745 140.881   2
   2   6  -1 1138.62 133.123   2
  -2   6   0 7453.64 315.146   4
   2   6   0 7407.05 340.660   5
   2   6   0 6658.56 290.429   2
  -2  -6   0 8099.45 330.075   5
  -2   6   0 7234.17 327.811   1
   2   6   1-18.7708 53.6499   6
  -2  -6  -1 65.1864 97.8730   5
   2   6   1 161.167 105.956   5
  -2   6  -1 64.3095 82.3871   4
  -2   6  -1 199.039 107.034   1
  -2   6  -2 39938.0 916.132   1
  -2  -6  -2 40649.6 877.352   5
  -2   6  -2 42178.5 827.353   4
   2  -6   2 39459.0 959.553   1
   2   6   2 39865.0 905.613   5
  -2  -6  -3 112.823 91.4893   3
  -2  -6  -3 63.5940 89.0321   5
   2  -6   3 260.403 134.524   1
   2   6   3 121.786 112.555   1
  -2   6  -3 5.16722 69.7202   4
  -2   6  -3 44.8369 104.119   1
   2   6   3 208.954 122.754   5
  -2  -6  -4 68719.7 1297.61   5
  -2   6  -4 70966.5 1195.51   4
  -2  -6  -4 69392.0 1300.72   3
   2  -6   4 70292.6 1500.01   1
   2   6   4 69562.4 1364.07   5
   2   6   4 69640.0 1399.01   1
   2   6   5 241.259 125.922   1
  -2   6  -5 111.093 69.2079   4
   2  -6   5 125.408 139.901   1
   2   6   5 114.613 116.313   5
  -2  -6  -5 15.1142 116.209   3
  -2  -6  -5 192.236 101.494   5
   2  -6   5 74.2777 75.2228   4
  -2  -6  -6 20974.0 675.107   3
   2   6   6 20421.7 762.064   1
   2   6   6 21886.9 681.966   5
   2  -6   6 20555.4 510.090   4
  -2  -6  -6 21566.5 613.122   5
   2  -6   6 20844.9 799.469   1
  -2  -6  -7 2421.30 207.888   5
   2  -6   7 1918.93 142.821   4
   2   6   7 1711.09 254.361   1
   2  -6   7 2163.37 290.606   1
   2   6   7 1861.19 212.534   5
   2   6   8 15945.2 610.183   5
   2   6   8 15820.3 736.840   1
   2  -6   8 14992.4 401.234   4
   2  -6   8 17031.2 782.451   1
   2   6   9 8.88371 176.356   1
   2  -6   9 161.893 185.139   1
   2   6   9 239.049 132.067   5
   2  -6   9 0.76766 44.2636   4
   2  -6  10 629.992 229.158   1
   2   6  10 400.523 227.171   1
   2   6  11 2527.82 381.789   1
   2  -6  11 1964.72 344.055   1
   2  -6  12 2917.42 421.881   1
   2   6  12 3274.61 437.717   1
   2  -6  13 882.207 297.104   1
   2   6  13 985.549 289.887   1
   2  -6  14 3673.71 507.243   1
   2   6  14 4119.58 532.090   1
   2   6  15 894.555 326.604   1
   2  -6  15 366.362 257.859   1
   2  -6  16 1492.52 370.488   1
   2   6  16 949.227 343.184   1
  -2   7  18 5837.68 661.428   1
  -2  -7  18 5116.62 578.964   1
  -2   7  17 696.986 311.195   1
  -2  -7  17 847.182 309.336   1
  -2  -7  16 4556.81 521.432   1
  -2   7  16 5017.53 572.059   1
  -2   7  15 1553.68 351.307   1
  -2  -7  15 1510.63 335.649   1
  -2  -7  14 6177.46 533.183   1
  -2   7  14 7160.77 622.914   1
  -2  -7  13 1261.62 288.969   1
  -2   7  13 2125.83 357.556   1
  -2  -7  12 5141.02 451.296   1
  -2   7  12 4795.73 476.575   1
  -2   7  11 242.273 187.269   1
   2  -7 -11 314.316 159.870   3
  -2  -7  11 420.414 188.847   1
  -2   7  10 5515.11 223.969   5
  -2  -7  10 5847.94 438.326   1
   2  -7 -10 5662.04 447.411   3
  -2   7  10 6656.32 508.090   1
  -2  -7   9 2820.11 300.112   1
   2  -7  -9 3748.43 355.070   3
  -2   7   9 3217.39 174.897   5
  -2   7   9 3224.45 345.936   1
  -2   7   8 32942.7 671.185   5
   2  -7  -8 32564.0 1011.05   3
  -2  -7   8 32478.5 936.034   1
  -2   7   7 7044.42 270.390   5
  -2  -7   7 6344.04 379.359   1
   2  -7  -7 7308.84 442.530   3
   2   7  -7 6949.84 341.945   1
   2  -7  -6 35305.3 980.586   3
  -2  -7   6 35446.2 884.961   1
  -2   7   6 36643.5 741.631   5
   2   7  -6 37263.1 836.267   1
  -2  -7   5 242.685 116.858   1
  -2   7   5-10.2214 81.9399   5
  -2  -7   5 76.3707 156.237   2
   2   7  -5 130.781 89.5691   1
   2  -7  -5 31.7672 136.254   3
  -2  -7   4 20515.6 547.493   1
   2  -7  -4 21165.8 647.146   6
  -2  -7   4 21393.0 628.811   2
   2   7  -4 20965.8 529.734   1
  -2  -7   3 40956.5 901.160   2
   2   7  -3 40841.2 763.650   1
   2  -7  -3 40151.6 921.922   6
   2   7  -2 11274.6 327.746   1
   2   7  -2 10870.1 387.872   2
   2   7  -2 11702.0 467.467   5
  -2   7   2 11378.9 243.849   2
  -2  -7   2 11136.4 410.629   2
   2   7  -1 45.4713 86.0166   2
  -2  -7   1 18.0542 100.989   2
   2   7  -1 2.54209 118.212   5
   2   7   0 29799.0 702.201   2
   2   7   0 29576.8 780.436   5
  -2   7   0 33035.4 779.020   1
  -2  -7  -1 5302.37 295.270   5
   2   7   1 4879.28 193.170   6
  -2   7  -1 4753.68 258.522   4
   2   7   1 4160.37 289.620   5
  -2   7  -1 4445.67 302.776   1
  -2   7  -2 19167.4 593.545   1
   2   7   2 17744.9 582.180   5
   2   7   2 18229.5 458.650   6
  -2  -7  -2 18930.2 565.422   5
  -2   7  -2 18872.3 522.728   4
   2  -7   2 17921.1 618.984   1
   2   7   3 44707.5 1030.31   5
  -2   7  -3 45922.8 908.963   4
   2  -7   3 45330.7 1105.18   1
  -2   7  -3 45127.2 1045.96   1
  -2  -7  -3 45737.8 984.485   5
  -2  -7  -3 45059.4 941.414   3
   2   7   3 45213.0 1004.89   1
   2  -7   4 90218.3 1826.32   1
  -2  -7  -4 89967.9 1606.36   5
   2   7   4 88463.5 1704.76   1
  -2   7  -4 95628.0 1504.38   4
   2   7   4 89614.2 1686.67   5
  -2  -7  -4 90371.2 1616.33   3
   2  -7   5 3069.36 311.564   1
  -2  -7  -5 2784.61 218.616   5
  -2   7  -5 2356.94 171.753   4
   2   7   5 2711.32 265.188   1
   2   7   5 3256.56 265.723   5
  -2  -7  -5 2716.78 237.786   3
   2   7   6 40336.1 1016.86   5
   2  -7   6 42686.9 1188.17   1
  -2  -7  -6 41210.2 941.293   5
  -2  -7  -6 41278.9 1039.15   3
   2   7   6 41530.5 1131.76   1
  -2  -7  -7 7683.14 441.038   3
   2   7   7 8003.83 498.614   1
   2   7   7 8040.11 422.619   5
   2  -7   7 8388.53 524.440   1
   2  -7   8 13436.8 714.995   1
   2   7   8 14885.4 720.655   1
   2   7   8 14772.2 593.107   5
   2   7   9 659.704 158.436   5
   2  -7   9 716.365 236.983   1
   2   7   9 449.233 200.616   1
   2  -7  10 269.754 207.527   1
   2   7  10 347.710 128.254   5
   2   7  10 877.363 249.276   1
   2  -7  11 619.148 244.451   1
   2   7  11 398.511 219.644   1
   2  -7  12 3657.17 457.704   1
   2   7  12 2759.77 400.145   1
   2   7  13 297.490 247.884   1
   2  -7  13 681.265 283.491   1
   2   7  14 6203.64 635.687   1
   2  -7  14 6138.82 615.365   1
   2   7  15 588.943 272.229   1
   2  -7  15 170.759 238.309   1
   2  -7  16 1554.74 375.739   1
   2   7  16 1579.82 381.708   1
  -2  -8  18-345.896 270.429   1
  -2   8  17 458.208 297.091   1
  -2  -8  17 550.989 273.845   1
  -2  -8  16 446.221 258.480   1
  -2   8  16 805.744 306.343   1
  -2   8  15 1430.99 364.016   1
  -2  -8  15 1809.81 348.490   1
  -2   8  14 2224.08 387.512   1
  -2  -8  14 2110.59 365.968   1
  -2  -8  13 665.412 227.621   1
  -2   8  13 431.013 216.364   1
  -2  -8  12 473.964 199.307   1
  -2   8  12 888.345 262.894   1
   2  -8 -12 673.143 217.842   3
  -2  -8  11 1594.47 272.204   1
  -2   8  11 1529.39 291.796   1
   2  -8 -11 1415.75 282.807   3
  -2  -8  10-141.773 155.089   1
   2  -8 -10-95.1846 156.187   3
  -2   8  10 322.777 187.196   1
  -2   8  10 148.813 64.0972   5
  -2  -8   9 1148.69 222.810   1
  -2   8   9 1235.83 129.013   5
   2  -8  -9 1504.17 260.873   3
  -2   8   9 1836.10 288.509   1
  -2  -8   8 3578.25 302.059   1
   2  -8  -8 3666.86 343.604   3
  -2   8   8 3598.10 208.117   5
  -2  -8   7 3992.69 299.887   1
   2  -8  -7 3402.46 318.808   3
  -2   8   7 3509.62 211.565   5
   2  -8  -6 2023.15 241.003   3
  -2  -8   6 1953.52 202.534   1
   2   8  -6 1172.61 153.075   1
  -2   8   6 1782.80 159.289   5
  -2  -8   5 21455.4 617.097   1
  -2  -8   5 21148.9 676.442   2
  -2   8   5 21151.4 577.006   5
   2   8  -5 20822.7 573.515   1
   2   8  -4 30701.9 685.712   1
  -2  -8   4 30606.8 802.505   2
   2  -8  -4 30994.8 835.344   6
  -2  -8   4 31015.8 720.680   1
   2  -8  -3 6005.05 334.221   6
   2   8  -3 6102.58 255.345   1
  -2  -8   3 5882.46 324.712   2
  -2  -8   2 41056.3 907.605   2
   2   8  -2 41379.3 878.357   2
  -2   8   2 39577.3 653.598   2
   2   8  -2 43206.4 787.383   1
   2   8  -2 41334.6 991.506   5
   2   8  -1 24701.8 719.033   5
   2   8  -1 22518.7 602.626   2
  -2  -8   1 23327.8 635.064   2
   2   8   0 25212.9 643.124   2
   2   8   0 25116.2 734.454   5
   2  -8   0 25552.8 482.842   2
  -2   8   0 26538.3 717.277   1
   2   8   1 10504.3 455.244   5
  -2   8  -1 11005.2 445.159   1
  -2   8  -1 10570.4 401.303   4
   2   8   1 9845.14 392.193   2
   2   8   2 3613.60 280.506   5
  -2   8  -2 3569.23 259.210   1
  -2   8  -2 4034.75 245.360   4
  -2  -8  -2 3818.53 260.930   5
   2  -8   2 3820.08 293.890   1
   2   8   2 3344.79 191.405   6
  -2   8  -3 7884.80 327.377   4
   2   8   3 7689.62 394.685   5
  -2  -8  -3 7333.08 357.339   5
   2   8   3 7820.78 318.202   6
   2  -8   3 7333.65 419.491   1
  -2  -8  -3 7476.84 342.307   3
   2   8   4 2839.19 280.307   5
   2  -8   4 2832.59 277.717   1
  -2  -8  -4 3062.53 231.386   5
  -2   8  -4 2895.28 199.083   4
  -2  -8  -4 2733.36 233.263   3
   2   8   4 3053.18 286.205   1
   2   8   5 30526.9 859.552   5
  -2   8  -5 32025.1 701.130   4
   2   8   5 29498.1 903.314   1
   2  -8   5 32614.8 1003.57   1
  -2  -8  -5 30964.4 836.718   3
  -2  -8  -6 8734.90 438.637   3
   2   8   6 8453.73 489.710   1
   2  -8   6 8641.26 526.476   1
   2   8   6 8495.84 444.705   5
  -2   8  -6 9168.61 325.749   4
   2   8   7 15013.6 697.366   1
  -2  -8  -7 16096.9 640.924   3
   2  -8   7 15292.5 732.637   1
   2   8   7 14733.0 598.783   5
   2   8   8 17686.6 675.638   5
   2  -8   8 19471.5 850.969   1
   2   8   8 17833.3 803.851   1
  -2  -8  -8 18440.2 728.148   3
   2   8   9 1113.70 233.784   1
   2   8   9 754.345 168.575   5
   2  -8   9 1037.84 260.410   1
   2  -8  10 4377.51 448.073   1
   2   8  10 4108.94 335.414   5
   2   8  10 4757.23 461.201   1
   2  -8  11 1131.57 285.392   1
   2   8  11 959.666 259.025   1
   2  -8  12 1489.10 336.070   1
   2   8  12 1549.20 337.221   1
   2   8  13 1772.12 366.940   1
   2  -8  13 1876.77 366.411   1
   2  -8  14 564.510 300.300   1
   2   8  14-182.888 251.275   1
   2   8  15 3474.18 515.619   1
   2  -8  15 2846.47 447.403   1
   2   8  16 1636.32 400.902   1
   2  -8  16 1979.19 399.706   1
  -2  -9  18-206.585 274.451   1
  -2   9  17 3618.33 536.880   1
  -2  -9  17 4197.78 510.782   1
  -2  -9  16 319.911 218.185   1
  -2   9  16 432.441 285.644   1
  -2  -9  15 7106.86 623.687   1
  -2   9  15 8849.14 725.811   1
  -2  -9  14-131.473 222.175   1
  -2   9  14-118.704 225.320   1
  -2   9  13 1765.11 348.214   1
  -2  -9  13 1572.82 291.462   1
   2  -9 -12 1826.30 312.638   3
  -2  -9  12 2082.18 328.039   1
  -2   9  12 2349.75 364.792   1
  -2   9  11 3959.12 428.112   1
  -2  -9  11 4162.68 403.915   1
  -2   9  11 3701.32 208.124   5
   2  -9 -11 4225.99 416.656   3
  -2   9  10 7152.92 302.510   5
  -2   9  10 7314.86 554.898   1
  -2  -9  10 7763.10 503.603   1
   2  -9 -10 7356.68 517.424   3
   2  -9  -9 30768.1 1031.40   3
  -2   9   9 31030.8 720.529   5
  -2  -9   9 31354.4 985.303   1
   2  -9  -8 2574.91 301.656   3
  -2  -9   8 2344.32 258.685   1
  -2   9   8 2717.38 199.040   5
  -2   9   7 25247.9 640.099   5
  -2  -9   7 23777.0 752.343   1
   2  -9  -7 23124.9 831.484   3
  -2  -9   6-12.7077 147.205   2
  -2   9   6 65.3884 96.3522   5
   2   9  -6-161.402 107.514   1
   2  -9  -6 62.0323 142.735   3
  -2  -9   6-25.0966 112.385   1
  -2  -9   5 23596.6 739.892   2
  -2   9   5 22733.2 645.221   5
  -2  -9   5 24190.4 683.777   1
   2   9  -5 24635.3 633.250   1
   2   9  -4 35009.7 758.131   1
  -2  -9   4 34016.1 874.656   2
   2  -9  -4 33303.2 895.818   6
  -2  -9   4 33677.1 798.221   1
   2   9  -3 14964.1 439.711   1
  -2  -9   3 15046.1 529.011   2
   2  -9  -3 14645.5 539.473   6
  -2   9   2 8233.51 229.959   2
   2   9  -2 8834.77 321.289   1
   2   9  -2 8467.26 437.138   5
  -2  -9   2 8579.08 381.258   2
   2   9  -2 8616.91 364.206   2
  -2  -9   1 29728.3 765.751   2
   2   9  -1 29915.1 731.167   2
   2   9  -1 30394.4 866.015   5
   2  -9   0 151.114 64.1899   2
  -2  -9   0 122.692 60.7304   6
   2   9   0 193.369 159.166   5
   2   9   0 87.8551 99.7259   2
  -2   9   0-26.4338 109.083   1
   2   9   1 14746.2 577.239   5
   2   9   1 13659.1 487.633   2
  -2   9  -1 15418.0 552.539   1
   2  -9   1 14768.0 387.733   2
  -2   9  -2 1367.99 161.587   4
   2   9   2 1076.57 121.143   6
   2   9   2 831.312 177.906   5
   2   9   3 96303.9 1609.13   6
   2   9   3 94880.5 1813.35   5
   2  -9   3 97752.8 1905.13   1
  -2   9  -3 100078. 1666.58   4
  -2  -9  -4 4594.05 306.137   3
   2   9   4 4770.95 338.799   5
   2  -9   4 5223.86 381.433   1
  -2   9  -4 5057.01 269.768   4
   2   9   4 4381.18 325.293   1
   2   9   4 4190.39 257.749   6
  -2   9  -5 31576.9 725.859   4
   2  -9   5 31741.5 1009.56   1
   2   9   5 30937.8 889.571   5
   2   9   5 29527.8 914.399   1
  -2  -9  -5 30615.3 844.339   3
  -2  -9  -6 2701.15 266.864   3
   2  -9   6 3034.50 333.420   1
   2   9   6 2310.75 249.553   5
   2   9   6 2681.10 303.509   1
  -2   9  -6 2743.11 182.115   4
   2   9   7 8409.55 458.393   5
   2  -9   7 9056.02 573.908   1
  -2  -9  -7 8989.91 482.803   3
   2   9   7 8303.37 525.279   1
  -2  -9  -8 616.503 170.325   3
   2  -9   8 951.194 238.770   1
   2   9   8 616.340 178.884   5
   2   9   8 749.473 216.787   1
   2  -9   9 9910.49 651.993   1
   2   9   9 9570.18 622.480   1
   2   9   9 9264.76 499.694   5
   2   9  10 1698.63 242.271   5
   2   9  10 1296.83 290.055   1
   2  -9  10 1491.15 308.626   1
   2   9  11 13246.4 610.949   5
   2   9  11 14418.2 827.781   1
   2  -9  11 13857.1 809.442   1
   2  -9  12 140.750 218.223   1
   2   9  12-11.8778 233.472   1
   2   9  13 4238.27 533.117   1
   2  -9  13 5103.13 540.301   1
   2   9  14-448.022 281.580   1
   2  -9  14 90.9538 237.922   1
   2   9  15 1169.04 333.789   1
   2  -9  15 428.152 280.650   1
   2  -9  16 281.706 253.822   1
  -2 -10  18 454.548 275.486   1
  -2 -10  17 412.061 278.190   1
  -2  10  17 84.6019 245.739   1
  -2 -10  16 243.809 228.458   1
  -2  10  16-151.283 258.358   1
  -2  10  15 200.172 265.044   1
  -2 -10  15 438.882 228.398   1
  -2  10  14 129.523 222.937   1
  -2 -10  14 273.356 199.513   1
  -2 -10  13 249.845 211.262   1
  -2  10  13 32.5529 216.836   1
   2 -10 -13 333.379 212.663   3
  -2 -10  12 4113.25 418.843   1
  -2  10  12 3433.58 454.375   1
   2 -10 -12 4141.21 442.729   3
  -2  10  11 7580.73 584.713   1
  -2 -10  11 6742.90 496.123   1
   2 -10 -11 6700.24 527.367   3
  -2  10  11 6093.99 287.282   5
  -2  10  10 1866.81 179.298   5
  -2  10  10 1849.43 325.487   1
   2 -10 -10 1869.40 302.614   3
  -2 -10  10 2063.50 279.250   1
  -2 -10   9 125.474 145.426   1
   2 -10  -9 252.772 166.073   3
  -2  10   9 183.239 82.9469   5
   2 -10  -8 7160.79 478.062   3
  -2 -10   8 7396.83 440.908   1
  -2  10   8 7311.01 341.806   5
   2  10  -8 5860.08 195.262   4
  -2  10   7 13623.9 483.162   5
   2 -10  -7 13468.1 639.740   3
  -2 -10   7 13812.9 619.581   2
  -2 -10   7 13880.9 586.050   1
  -2  10   6-84.8246 90.2666   5
   2 -10  -6 0.75903 148.999   3
  -2 -10   6 105.412 124.906   1
  -2 -10   6-20.4281 135.892   2
   2  10  -6 81.7313 89.5463   1
  -2 -10   5 9677.36 419.252   1
  -2  10   5 9690.41 418.655   5
  -2 -10   5 9775.35 467.636   2
   2  10  -5 9658.10 390.095   1
   2 -10  -4 13086.3 538.321   6
  -2 -10   4 12678.2 518.472   2
   2  10  -4 13175.1 439.486   1
  -2  10   3 34127.2 651.869   2
  -2 -10   3 35295.1 879.157   2
   2  10  -3 34965.4 775.355   1
   2 -10  -3 34613.9 898.784   6
  -2 -10   2 986.372 180.640   2
   2  10  -2 981.642 129.972   1
   2  10  -2 871.008 149.324   2
  -2  10   2 870.616 84.2770   2
   2  10  -2 1198.59 215.500   5
   2  10  -1 11267.9 525.870   5
  -2 -10   1 10979.1 461.449   2
   2  10  -1 11089.4 425.561   2
   2 -10   0 7073.25 247.430   2
   2  10   0 8060.55 440.246   5
   2  10   0 7456.84 345.965   2
  -2 -10   0 7811.35 265.806   6
   2 -10   1 22202.3 521.487   2
   2  10   1 22611.2 654.141   2
   2  10   1 22960.3 759.170   5
  -2  10  -2 4288.46 276.626   4
   2  10   2 3477.08 308.176   5
   2 -10   3 33472.1 993.064   1
   2  10   3 33092.9 957.219   5
   2  10   3 35593.2 789.789   6
  -2  10  -3 35981.9 839.882   4
  -2  10  -4 3056.00 217.414   4
   2  10   4 3266.22 285.068   5
  -2 -10  -4 3013.86 249.970   3
   2  10   4 2811.55 219.187   6
   2 -10   4 2745.40 288.438   1
   2  10   5 16610.1 672.001   1
  -2  10  -5 18286.0 529.697   4
   2  10   5 15950.8 634.067   5
  -2 -10  -5 16853.4 622.181   3
   2 -10   5 17556.4 739.403   1
  -2  10  -6 37.7777 68.5493   4
   2  10   6-58.5996 153.139   1
   2 -10   6-26.6141 166.326   1
   2  10   6 87.9282 115.936   5
  -2 -10  -6-80.3506 122.677   3
   2 -10   7 8987.24 582.418   1
   2  10   7 8854.42 537.355   1
   2  10   7 9196.30 491.462   5
  -2  10  -7 9876.06 346.903   4
  -2 -10  -7 9134.53 504.380   3
   2 -10   8-82.2442 177.914   1
  -2 -10  -8-128.991 144.134   3
   2  10   8-63.4588 124.036   5
   2  10   8-191.233 200.744   1
   2 -10   9 11537.8 689.115   1
  -2 -10  -9 10616.8 590.631   3
   2  10   9 10819.6 549.935   5
   2  10   9 11407.3 677.163   1
   2  10  10 67.9593 202.396   1
   2 -10  10-40.3569 192.469   1
   2  10  10 52.3751 134.664   5
   2  10  11 4603.25 368.947   5
   2 -10  11 5359.83 524.729   1
   2  10  11 4680.83 516.643   1
   2 -10  12-35.4388 219.778   1
   2  10  12-175.847 215.497   1
   2  10  13 2366.52 407.775   1
   2 -10  13 1942.77 498.982   1
   2  10  14 12.0296 250.749   1
   2 -10  14-96.8988 235.874   1
   2 -10  15 3019.75 502.110   1
   2  10  15 2747.19 453.650   1
   2 -10  16 735.098 323.784   1
  -2 -11  18 794.852 293.498   1
  -2  11  17-281.106 302.912   1
  -2 -11  17 47.7955 212.975   1
  -2 -11  16 2326.19 382.731   1
  -2  11  16 2351.44 442.974   1
  -2  11  15 519.090 293.237   1
  -2 -11  15 716.718 287.223   1
  -2 -11  14 5825.97 529.987   1
  -2  11  14 6857.27 649.305   1
  -2 -11  13 10518.1 669.625   1
  -2  11  13 9631.95 730.197   1
   2 -11 -13 10882.2 702.234   3
   2 -11 -12 2136.12 343.623   3
  -2 -11  12 1463.68 293.450   1
  -2  11  12 1674.41 345.136   1
   2 -11 -11 1945.67 321.074   3
  -2  11  11 2186.72 360.138   1
  -2  11  11 2177.57 192.833   5
  -2 -11  11 2491.67 326.407   1
  -2  11  10 13489.8 754.040   1
   2 -11 -10 12751.2 696.134   3
  -2  11  10 12306.2 465.610   5
  -2 -11  10 12267.7 642.170   1
  -2 -11   9 7551.27 480.890   1
  -2  11   9 7780.84 366.498   5
   2 -11  -9 7391.69 510.570   3
  -2  11   8 5358.38 317.863   5
   2 -11  -8 5062.92 417.546   3
   2  11  -8 5030.77 203.173   4
  -2 -11   8 5417.40 416.244   2
  -2 -11   8 5777.56 405.533   1
  -2  11   7 5796.24 334.960   5
   2 -11  -7 5754.73 439.733   3
  -2 -11   7 5588.49 376.736   1
  -2 -11   7 5189.09 386.586   2
  -2 -11   6 23634.7 738.655   1
  -2 -11   6 23681.7 790.943   2
  -2  11   6 23263.9 703.832   5
   2 -11  -5 1662.17 221.638   6
  -2  11   5 1902.36 208.494   5
   2  11  -5 2177.85 191.482   1
  -2 -11   5 1655.51 225.438   2
  -2 -11   4 35665.9 946.293   2
   2  11  -4 37618.6 839.694   1
   2 -11  -4 35820.2 974.805   6
  -2  11   3 7456.98 259.472   2
  -2 -11   3 7364.61 395.929   2
   2 -11  -3 7720.55 407.164   6
   2  11  -3 8000.55 340.031   1
  -2 -11   2 7262.83 377.622   2
  -2  11   2 7035.14 236.245   2
   2  11  -2 7529.62 328.099   1
   2  11  -2 7945.06 467.589   5
   2  11  -1 11928.1 452.763   2
   2  11  -1 12180.3 564.868   5
   2  11   0 13523.0 485.589   2
   2  11   0 14532.0 617.044   5
   2 -11   0 13914.3 376.679   2
  -2 -11   0 14567.0 395.843   6
   2 -11   1 16476.8 447.339   2
   2  11   1 17203.8 671.389   5
   2  11   2 29874.4 910.018   5
   2 -11   2 29773.0 695.530   2
   2  11   3 5388.66 275.611   6
  -2  11  -3 5585.51 312.025   4
   2  11   3 5567.41 370.805   5
   2  11   4 1222.01 209.883   5
  -2 -11  -4 1410.23 181.474   3
   2  11   4 1426.15 162.019   6
  -2  11  -4 2011.57 198.137   4
   2 -11   4 1366.10 245.831   1
  -2 -11  -5 6810.12 399.700   3
   2  11   5 6017.40 399.949   5
   2 -11   5 6954.07 461.500   1
   2  11   5 6658.94 428.937   1
  -2  11  -5 6824.60 320.705   4
   2  11   6 2285.63 285.674   1
  -2  11  -6 2475.95 188.738   4
  -2 -11  -6 1970.71 244.095   3
   2  11   6 2156.35 258.358   5
   2 -11   6 2581.61 338.324   1
  -2  11  -7 5529.26 263.636   4
  -2 -11  -7 5050.03 385.085   3
   2  11   7 4890.64 369.976   5
   2 -11   7 5714.93 469.476   1
   2  11   7 4361.84 398.300   1
  -2 -11  -8 9929.15 546.686   3
   2  11   8 9606.30 525.113   5
   2  11   8 9244.98 601.879   1
   2 -11   8 9838.37 643.289   1
   2  11   9 4631.81 374.758   5
  -2 -11  -9 4903.45 417.511   3
   2  11   9 5051.66 474.878   1
   2 -11   9 5237.48 493.434   1
   2  11  10 11629.2 733.772   1
   2 -11  10 11951.8 750.692   1
   2  11  10 10546.9 568.738   5
   2  11  11 3182.57 320.852   5
   2 -11  11 3044.98 441.716   1
   2  11  11 3108.12 422.749   1
   2 -11  12 4350.55 486.589   1
   2  11  12 3309.09 446.472   1
   2 -11  13 250.795 231.935   1
   2  11  13 245.476 238.673   1
   2 -11  14 568.045 282.977   1
   2  11  14 423.114 277.318   1
   2 -11  15 188.277 235.285   1
   2  11  15 761.831 324.054   1
  -2 -12  18-693.356 327.418   1
  -2 -12  17 482.020 262.350   1
  -2 -12  16-59.8822 222.111   1
  -2  12  16 478.313 271.594   1
  -2  12  15 9.47243 229.275   1
  -2 -12  15 321.445 236.643   1
  -2 -12  14 514.489 234.688   1
   2 -12 -14 390.486 236.241   3
  -2  12  14 312.445 249.869   1
  -2  12  13 620.541 257.754   1
  -2 -12  13 326.866 192.998   1
   2 -12 -13-99.5082 206.113   3
   2 -12 -12 4242.72 454.349   3
  -2  12  12 3105.62 440.592   1
  -2 -12  12 3594.46 401.174   1
  -2 -12  11-266.531 180.101   1
   2 -12 -11 12.6211 181.872   3
  -2  12  11-89.5382 100.826   5
  -2  12  11-18.0233 224.833   1
   2 -12 -10 2457.88 334.304   3
  -2 -12  10 1780.33 280.039   1
  -2  12  10 2590.78 229.019   5
  -2 -12   9 1639.59 274.052   1
   2 -12  -9 1763.52 295.763   3
  -2 -12   9 1605.41 279.075   2
  -2  12   9 1630.82 193.420   5
  -2  12   8-95.3673 102.332   5
   2 -12  -8-19.9841 151.794   3
   2  12  -8 2.27436 54.7907   4
  -2 -12   8-146.843 152.960   2
  -2 -12   8 88.1284 135.205   1
  -2 -12   7 2133.66 270.733   2
   2 -12  -7 2139.20 294.154   3
  -2 -12   7 2098.87 244.327   1
  -2  12   7 2163.76 224.864   5
  -2  12   6 6490.47 374.353   5
  -2 -12   6 7358.85 443.996   2
  -2 -12   6 7118.64 399.590   1
   2  12  -5 1214.81 149.977   1
   2 -12  -5 1056.07 205.643   6
  -2  12   5 816.747 157.813   5
  -2 -12   5 1339.97 212.132   2
   2  12  -4 6911.68 332.280   1
  -2 -12   4 6568.15 386.174   2
   2 -12  -4 6657.20 402.184   6
  -2  12   3 409.976 74.8675   2
   2  12  -3 408.113 103.758   1
   2 -12  -3 418.166 144.487   6
  -2 -12   3 250.521 121.787   2
  -2  12   2 16488.9 401.855   2
  -2 -12   2 16692.4 599.759   2
   2  12  -2 16950.2 522.811   1
   2  12  -2 17010.3 703.846   5
   2  12  -1 38889.8 1109.35   5
  -2 -12   0 49111.4 931.064   6
   2  12   0 50061.1 1284.18   5
   2 -12   1 5947.22 266.602   2
   2  12   1 5736.16 419.002   5
   2  12   2 15635.3 659.822   5
   2 -12   2 15183.4 473.821   2
   2 -12   3 8962.44 391.192   2
   2  12   3 9264.88 515.508   5
   2  12   4 12123.9 584.540   5
  -2 -12  -5 132.334 139.120   3
   2  12   5-128.956 150.751   5
   2 -12   5-24.1669 144.079   1
  -2  12  -5 23.3492 79.4710   4
   2 -12   6 10368.5 616.823   1
   2  12   6 10489.0 547.381   5
  -2 -12  -6 10543.9 535.861   3
   2  12   6 10667.8 598.941   1
  -2  12  -6 11281.8 418.699   4
  -2 -12  -7 1364.14 227.107   3
   2  12   7 1147.83 202.385   5
  -2  12  -7 1465.00 149.531   4
   2  12   7 1432.74 249.786   1
   2 -12   7 1160.24 247.121   1
   2  12   8 8166.53 567.899   1
   2  12   8 9188.51 527.040   5
  -2 -12  -8 8459.24 518.767   3
   2 -12   8 8683.32 612.174   1
   2  12   9 8977.01 638.936   1
   2  12   9 9073.58 526.772   5
   2 -12   9 10212.0 670.551   1
  -2 -12  -9 10215.1 584.835   3
   2  12  10 3854.25 445.212   1
   2  12  10 3421.72 336.707   5
   2 -12  10 4138.42 471.167   1
  -2 -12 -10 3621.09 375.748   3
   2  12  11 455.424 230.223   1
   2  12  11 306.085 165.899   5
   2 -12  11 439.054 258.270   1
   2 -12  12 2333.29 406.867   1
   2  12  12 2560.05 410.469   1
   2  12  13-175.470 220.416   1
   2 -12  13 210.671 236.869   1
   2 -12  14 1343.15 333.745   1
   2  12  14 1374.78 370.961   1
   2 -12  15 608.319 316.995   1
   2  12  15 58.0790 255.693   1
  -2 -13  18-570.323 331.505   1
  -2 -13  17-56.2193 235.030   1
  -2 -13  16 6931.16 625.479   1
  -2  13  16 7467.22 723.548   1
  -2 -13  15 610.743 257.774   1
  -2  13  15 884.394 314.864   1
  -2 -13  14 5893.61 529.780   1
  -2  13  14 6363.40 626.196   1
   2 -13 -14 7856.08 623.275   3
  -2 -13  13 689.021 242.116   1
  -2  13  13 173.867 208.375   1
   2 -13 -13 476.377 224.336   3
  -2  13  12 11525.8 778.760   1
   2 -13 -12 10353.4 693.262   3
  -2 -13  12 11907.0 692.311   1
  -2  13  11-0.36371 196.905   1
   2 -13 -11 21.2722 202.603   3
  -2 -13  11-70.6516 169.102   1
  -2  13  10 18034.9 620.586   5
  -2 -13  10 16998.7 796.962   2
  -2 -13  10 17219.0 791.340   1
   2 -13 -10 19088.7 878.776   3
   2 -13  -9 6354.26 488.972   3
  -2  13   9 6145.02 364.274   5
  -2 -13   9 6327.96 467.705   2
  -2 -13   9 6014.30 438.438   1
  -2  13   8 872.851 156.954   5
  -2 -13   8 892.409 188.851   1
   2  13  -8 720.355 104.957   4
   2 -13  -8 817.946 228.587   3
  -2 -13   8 1162.31 237.975   2
   2 -13  -7 4976.07 422.562   3
  -2  13   7 5659.25 367.862   5
  -2 -13   7 4904.05 357.274   1
  -2 -13   7 5264.34 396.118   2
  -2 -13   6 11962.4 567.882   2
  -2  13   6 12635.5 556.324   5
  -2 -13   5 4123.07 328.249   2
  -2  13   5 3931.92 317.069   5
   2 -13  -5 4119.69 342.009   6
   2  13  -4 20684.9 608.632   1
   2 -13  -4 19389.0 716.127   6
  -2 -13   4 19763.5 691.018   2
  -2  13   4 19286.0 508.927   2
  -2 -13   3 1534.87 217.509   2
  -2  13   3 1716.99 140.974   2
   2 -13  -3 1475.28 203.204   6
   2  13  -3 2043.43 198.080   1
  -2  13   2 9617.51 303.563   2
  -2 -13   2 9610.72 463.137   2
   2  13  -2 10431.9 563.785   5
   2  13  -2 9664.04 402.214   1
   2  13  -1 2660.54 306.419   5
  -2 -13   1 1879.36 158.219   6
  -2 -13   0 22304.8 571.018   6
   2  13   0 24140.6 863.478   5
   2  13   1 6284.62 444.930   5
   2 -13   1 6177.37 272.579   2
   2 -13   2 12858.2 439.303   2
   2  13   2 12664.1 619.907   5
   2  13   3 5517.75 422.803   5
   2 -13   3 4800.74 297.990   2
   2 -13   4 7360.65 372.784   2
   2  13   4 7282.10 475.342   5
   2 -13   5 1880.68 282.549   1
   2  13   5 1928.58 260.871   5
  -2 -13  -5 1887.40 239.400   3
  -2  13  -6 10145.9 410.358   4
  -2 -13  -6 9694.44 520.480   3
   2  13   6 9685.66 571.235   1
   2  13   6 10205.9 560.238   5
   2 -13   6 9623.82 603.401   1
   2  13   7 7089.12 473.904   5
  -2 -13  -7 6823.09 453.389   3
   2 -13   7 6356.53 512.976   1
   2  13   7 6623.97 498.794   1
   2  13   8 8716.62 591.362   1
   2  13   8 9053.31 530.680   5
   2 -13   8 9814.55 644.724   1
  -2 -13  -8 9703.94 563.999   3
   2  13   9 1784.10 318.434   1
   2  13   9 1749.93 261.678   5
  -2 -13  -9 1706.86 274.459   3
   2 -13   9 1861.35 336.694   1
   2 -13  10 5122.47 518.820   1
   2  13  10 5428.21 421.097   5
   2  13  10 5165.88 503.523   1
  -2 -13 -10 4665.84 418.936   3
   2  13  11 191.125 161.382   5
   2 -13  11-89.8815 219.328   1
   2  13  11-48.4459 198.493   1
   2  13  12 3048.31 433.197   1
   2 -13  12 3279.50 467.482   1
   2  13  13 52.9627 226.627   1
   2 -13  13 316.671 274.073   1
   2 -13  14 1129.90 337.099   1
   2  13  14 1391.51 347.234   1
   2 -13  15-41.7276 269.498   1
   2  13  15 83.7158 250.849   1
  -2 -14  17-263.038 292.550   1
  -2 -14  16 1931.47 396.373   1
  -2  14  16 1956.17 424.982   1
  -2 -14  15 392.185 246.718   1
   2 -14 -15 398.064 221.552   3
  -2  14  15 602.923 287.433   1
  -2 -14  14-65.1140 230.011   1
  -2  14  14-372.411 249.753   1
  -2  14  13 288.870 246.858   1
   2 -14 -13 132.776 217.586   3
  -2 -14  13-0.24785 182.262   1
  -2 -14  12 2048.49 370.403   2
  -2 -14  12 2044.05 325.243   1
   2 -14 -12 2364.45 365.890   3
  -2  14  12 2213.93 384.105   1
  -2  14  11 2913.36 416.911   1
  -2 -14  11 3044.19 378.624   2
   2 -14 -11 2713.04 369.315   3
  -2 -14  11 2699.40 337.332   1
  -2  14  10 1641.56 212.915   5
  -2 -14  10 1052.90 224.350   1
  -2 -14  10 1903.42 316.222   2
   2 -14 -10 1355.11 284.740   3
   2 -14  -9 2192.55 320.580   3
  -2  14   9 1914.47 229.912   5
  -2 -14   9 1788.36 272.109   1
  -2 -14   9 1885.01 306.435   2
  -2  14   8 8077.95 440.850   5
  -2 -14   8 7583.53 502.423   2
   2 -14  -8 7318.76 518.620   3
  -2 -14   8 7287.32 464.002   1
  -2  14   7-25.6905 124.929   5
   2 -14  -7-101.260 164.818   3
  -2  14   6 5215.25 368.183   5
  -2 -14   6 5802.88 411.947   2
  -2 -14   5 3385.67 307.044   2
   2 -14  -5 3363.30 321.517   6
  -2  14   5 3211.34 305.081   5
  -2 -14   4 1148.62 216.757   2
   2 -14  -4 881.866 182.252   6
  -2  14   4 839.566 113.478   2
  -2 -14   3 315.586 165.317   2
  -2  14   3 172.757 72.7178   2
   2 -14  -3 208.701 137.927   6
   2  14  -2-214.768 204.751   5
  -2  14   2 134.618 70.2466   2
   2 -14  -2-74.0739 121.248   6
  -2 -14   2 4.23806 122.304   2
   2  14  -2 193.756 94.4192   1
   2  14  -1 4193.48 390.046   5
  -2 -14   1 3891.19 221.648   6
   2  14   0 28184.7 981.802   5
  -2 -14   0 28079.8 665.498   6
   2 -14   1 4113.20 231.944   2
   2  14   1 4022.26 357.395   5
   2 -14   2 10426.1 402.319   2
   2  14   2 11130.2 593.742   5
   2  14   3 3699.57 350.598   5
   2 -14   3 3374.24 243.476   2
   2 -14   4 6716.98 370.801   2
   2  14   4 6759.94 474.382   5
   2  14   5 27.7648 149.081   5
   2 -14   5-85.6710 121.035   2
  -2 -14  -5-53.4159 126.508   3
   2  14   6 7147.33 497.895   1
   2  14   6 6689.50 468.413   5
   2 -14   6 7675.65 536.701   1
  -2 -14  -6 6860.19 451.072   3
  -2 -14  -7 2136.22 273.119   3
   2  14   7 2313.17 291.631   5
   2  14   7 2837.87 348.772   1
   2 -14   7 2318.84 337.307   1
   2  14   8 2103.28 281.417   5
   2  14   8 2147.71 315.190   1
   2 -14   8 2271.44 328.379   1
  -2 -14  -8 2175.98 295.755   3
   2 -14   9 9211.10 646.342   1
  -2 -14  -9 9043.49 569.884   3
   2  14   9 9127.28 642.269   1
   2  14   9 7871.90 519.522   5
   2  14  10 6440.67 562.208   1
   2 -14  10 8072.08 639.647   1
   2  14  10 6535.76 480.504   5
  -2 -14 -10 7602.37 531.115   3
  -2 -14 -11 125.942 167.644   3
   2  14  11-60.6448 206.898   1
   2 -14  11 460.795 264.755   1
   2 -14  12 2920.97 434.554   1
   2  14  12 2330.58 397.694   1
   2 -14  13 2451.78 410.632   1
   2  14  13 1721.63 373.840   1
   2 -14  14 2299.60 413.807   1
   2  14  14 2087.97 404.809   1
   2 -14  15 100.050 240.042   1
  -2 -15  17 765.632 336.728   1
  -2 -15  16 393.016 250.616   1
  -2 -15  16 204.005 259.084   2
  -2  15  15 6181.99 648.648   1
  -2 -15  15 5496.59 564.946   1
  -2 -15  15 6837.38 613.769   2
   2 -15 -15 5746.26 570.514   3
  -2 -15  14 3.95538 207.647   2
  -2  15  14-20.5984 234.655   1
   2 -15 -14 257.905 229.527   3
  -2 -15  14 30.8439 198.043   1
  -2  15  13 9505.85 746.882   1
  -2 -15  13 11152.3 724.907   2
  -2 -15  13 9296.50 667.581   1
   2 -15 -13 9582.41 692.678   3
   2 -15 -12 449.461 231.335   3
  -2 -15  12 127.602 199.318   2
  -2  15  12 270.595 232.917   1
  -2 -15  12 230.194 184.541   1
  -2 -15  11 8411.75 574.771   1
  -2 -15  11 8871.81 604.315   2
   2 -15 -11 8224.89 611.029   3
  -2  15  11 8899.55 677.340   1
  -2  15  10-158.776 124.276   5
  -2 -15  10 281.762 192.964   2
  -2 -15  10 170.578 160.087   1
   2 -15 -10 134.447 173.329   3
  -2 -15   9 26588.2 990.919   2
   2 -15  -9 26834.8 1056.69   3
  -2  15   9 27846.6 874.208   5
  -2 -15   9 25560.4 940.597   1
  -2  15   8 5339.05 386.749   5
  -2 -15   8 4585.03 408.780   2
   2 -15  -8 5215.16 463.855   3
  -2 -15   8 5073.78 397.838   1
  -2 -15   7 4526.91 397.425   2
  -2  15   7 4969.41 387.416   5
  -2 -15   6 3093.14 321.515   2
  -2  15   6 2752.86 291.331   5
  -2  15   5 406.730 102.322   2
   2 -15  -5 605.805 177.219   6
  -2  15   5 600.370 172.757   5
  -2 -15   5 727.755 194.776   2
  -2  15   4 3053.95 197.524   2
  -2 -15   4 3454.87 312.107   2
   2 -15  -4 2573.58 278.252   6
   2 -15  -3 23087.2 797.505   6
  -2 -15   3 22459.6 766.299   2
  -2  15   3 22050.7 537.461   2
   2 -15  -2 144.416 125.646   6
   2  15  -2-38.1935 164.342   5
  -2  15   2 60.9259 60.9932   2
  -2 -15   2 189.286 144.397   2
   2  15  -1 5294.35 445.906   5
  -2 -15   1 4927.88 262.796   6
  -2 -15   0 5708.13 288.346   6
   2  15   0 7119.82 500.301   5
   2 -15   1 79.4010 93.6122   2
   2  15   1 43.1009 160.065   5
   2  15   2 37.0419 162.535   5
   2 -15   2 220.396 107.580   2
   2 -15   3 10772.9 454.023   2
   2  15   3 10919.2 610.289   5
   2  15   4 1806.02 276.944   5
   2 -15   4 1814.60 210.505   2
   2 -15   5 24395.7 781.861   2
  -2 -15  -5 23374.4 851.842   3
   2  15   5 23685.2 910.689   5
   2  15   6 5044.54 420.757   5
  -2 -15  -6 4611.36 386.481   3
   2 -15   6 5450.14 383.501   2
   2  15   6 5232.31 442.018   1
   2  15   7 11197.0 622.659   5
  -2 -15  -7 11067.9 601.715   3
   2  15   7 11393.0 658.190   1
   2 -15   7 11042.3 694.818   1
   2 -15   8 136.114 180.927   1
   2  15   8 190.699 163.062   5
   2  15   8 539.443 222.007   1
  -2 -15  -8 402.736 183.254   3
  -2 -15  -9 8328.12 560.753   3
   2  15   9 8084.80 532.885   5
   2  15   9 8015.17 611.236   1
   2 -15   9 7977.29 614.787   1
   2  15  10 1665.95 269.106   5
   2 -15  10 1645.49 326.660   1
  -2 -15 -10 1500.54 289.514   3
   2  15  10 1567.34 344.752   1
   2  15  11 3324.45 429.041   1
   2 -15  11 2744.10 415.376   1
  -2 -15 -11 2738.06 347.417   3
   2 -15  12 543.982 242.111   1
   2  15  12 754.522 270.065   1
   2 -15  13-168.731 233.366   1
   2  15  13 375.723 273.010   1
   2 -15  14-75.3348 238.920   1
   2  15  14 405.434 261.780   1
  -2 -16  16 851.143 289.740   2
  -2 -16  16-72.8362 224.611   1
  -2  16  15 1538.11 374.549   1
   2 -16 -15 1724.55 337.030   3
  -2 -16  15 1124.26 291.797   1
  -2 -16  15 1746.24 353.830   2
   2 -16 -14 206.098 205.019   3
  -2  16  14-101.507 251.686   1
  -2 -16  14 481.001 274.247   2
  -2 -16  14 234.889 209.343   1
  -2 -16  13 1401.45 310.907   2
  -2 -16  13 1371.48 281.099   1
  -2  16  13 1438.47 347.319   1
   2 -16 -13 1604.95 339.171   3
  -2 -16  12 143.519 195.513   2
   2 -16 -12-90.7292 211.572   3
  -2 -16  12 103.468 183.792   1
  -2  16  12 165.565 220.788   1
  -2 -16  11 353.617 176.516   1
   2 -16 -11 206.535 203.578   3
  -2 -16  11 869.539 285.102   2
  -2  16  11 510.390 237.858   1
  -2 -16  10 253.442 180.732   1
   2 -16 -10 239.261 182.645   3
  -2  16  10 619.199 168.289   5
  -2 -16  10 243.309 188.452   2
  -2  16   9 6517.91 429.116   5
   2 -16  -9 6824.09 543.206   3
  -2 -16   9 6907.86 508.929   2
  -2 -16   9 6505.19 471.604   1
   2 -16  -8 421.294 210.836   3
  -2 -16   8 808.233 223.299   2
  -2  16   8 1016.25 201.992   5
  -2  16   7 125.810 145.081   5
  -2 -16   7-116.632 194.812   2
  -2 -16   6 152.249 175.959   2
  -2  16   6 392.594 168.104   5
  -2 -16   5-22.6945 143.550   2
   2 -16  -5 16.5987 152.827   6
  -2  16   5 54.8894 85.8539   2
  -2  16   5 86.0757 134.685   5
   2 -16  -4 215.870 150.175   6
  -2  16   4 217.246 160.615   5
  -2 -16   4 113.502 142.786   2
  -2  16   4 93.1484 78.5365   2
   2  16  -3 3280.55 377.356   5
  -2 -16   3 3046.30 301.692   2
   2 -16  -3 2692.83 297.820   6
  -2  16   3 2808.04 185.494   2
   2 -16  -2 1045.15 193.931   6
   2  16  -2 1225.18 267.231   5
  -2 -16   1 7018.28 331.187   6
   2  16  -1 7547.81 530.761   5
  -2 -16   0 2535.78 201.318   6
   2  16   0 2561.31 334.701   5
   2 -16   1 50880.6 1031.61   2
   2  16   1 51737.5 1462.52   5
   2 -16   2 186.491 107.895   2
   2  16   2-104.297 174.838   5
   2 -16   3 15261.7 537.423   2
   2  16   3 14785.2 729.617   5
   2 -16   4 10999.9 473.305   2
   2  16   4 11916.2 651.006   5
   2 -16   5 4505.83 336.146   2
   2  16   5 4594.92 420.692   5
  -2 -16  -5 5129.41 399.032   3
   2  16   6 9.62255 164.121   5
  -2 -16  -6-56.8268 145.999   3
   2 -16   6 322.213 157.745   2
   2  16   7 12234.4 667.642   5
   2  16   7 13409.2 732.251   1
  -2 -16  -7 12219.7 647.331   3
   2 -16   7 13202.6 623.957   2
  -2 -16  -8 937.970 218.479   3
   2  16   8 1421.79 280.500   5
   2 -16   8 1476.68 289.819   1
   2  16   8 1490.89 296.889   1
   2 -16   9 2626.19 372.089   1
   2  16   9 2539.16 321.300   5
   2  16   9 2463.40 358.969   1
  -2 -16  -9 2716.38 336.779   3
  -2 -16 -10-178.116 196.837   3
   2  16  10 246.561 226.003   1
   2 -16  10-52.4868 228.107   1
   2  16  10-92.5860 151.595   5
   2  16  11 2466.45 400.684   1
  -2 -16 -11 2771.96 357.477   3
   2 -16  11 2852.08 425.628   1
   2 -16  12-39.4902 225.419   1
   2  16  12 7.97976 214.586   1
   2  16  13 2949.63 439.097   1
   2 -16  13 2109.30 395.893   1
   2 -16  14 688.299 287.072   1
   2  16  14 465.453 309.990   1
   2 -17 -15 1313.50 321.660   3
  -2 -17  15 1303.62 319.140   2
  -2  17  14 344.493 273.155   1
  -2 -17  14 81.7042 190.372   1
  -2 -17  14 831.294 281.719   2
   2 -17 -14 132.525 206.133   3
  -2 -17  13 215.153 185.601   1
   2 -17 -13-296.762 234.879   3
  -2  17  13 208.065 242.804   1
  -2  17  12 5387.47 572.418   1
  -2 -17  12 5158.66 511.472   2
   2 -17 -12 5652.78 538.692   3
  -2 -17  12 4666.24 451.059   1
   2 -17 -11 3330.44 424.151   3
  -2 -17  11 2608.96 358.440   2
  -2 -17  11 3135.95 368.533   1
   2 -17 -10 2016.67 330.239   3
  -2  17  10 2330.13 271.975   5
  -2 -17  10 1624.51 290.102   2
  -2  17   9 6640.48 448.594   5
  -2 -17   9 6417.94 507.529   2
   2 -17  -9 6974.78 560.950   3
  -2 -17   8 19312.8 825.097   2
  -2  17   8 19868.5 793.828   5
   2 -17  -8 18119.9 878.376   3
  -2  17   7 6234.69 448.920   5
  -2 -17   7 5823.32 442.476   2
  -2  17   6 3174.15 337.588   5
  -2 -17   6 3028.05 318.826   2
  -2  17   5 8545.12 544.988   5
   2 -17  -5 8876.67 529.703   6
  -2 -17   5 8070.14 489.754   2
  -2 -17   4 14922.7 654.846   2
   2 -17  -4 14053.8 650.192   6
  -2  17   4 15110.4 721.460   5
  -2 -17   3 8151.28 476.956   2
   2  17  -3 8380.13 591.258   5
   2 -17  -3 7658.29 474.665   6
   2  17  -2 1920.67 306.112   5
   2 -17  -2 1970.30 239.619   6
   2  17  -1 6143.02 496.823   5
  -2 -17   1 6515.18 324.822   6
   2  17   0-56.8831 189.633   5
  -2 -17   0 76.5312 92.0438   6
   2  17   1 1876.92 321.111   5
   2  17   2 5579.12 465.471   5
   2 -17   2 4782.51 296.453   2
   2 -17   3 5965.90 340.441   2
   2  17   3 5618.21 485.280   5
   2  17   4-69.6382 186.612   5
   2 -17   4 238.992 108.014   2
  -2 -17  -5 3014.80 317.170   3
   2  17   5 2837.28 342.979   5
   2 -17   5 3038.60 282.499   2
   2 -17   6 1110.68 204.057   2
   2  17   6 1256.15 263.001   5
  -2 -17  -6 1574.33 259.312   3
  -2 -17  -7 5206.27 428.934   3
   2  17   7 5247.14 473.228   1
   2  17   7 4254.31 413.905   5
   2 -17   7 5105.10 400.664   2
   2 -17   8 8427.32 529.561   2
  -2 -17  -8 8344.67 554.279   3
   2  17   8 8792.63 621.403   1
   2  17   8 7425.07 536.897   5
  -2 -17  -9 2344.69 325.253   3
   2  17   9 2164.18 359.152   1
   2  17   9 1558.53 274.172   5
   2 -17   9 1701.60 276.863   2
   2 -17   9 2729.27 384.979   1
   2 -17  10 791.146 268.359   1
   2  17  10 534.324 207.884   5
   2  17  10 471.895 226.262   1
  -2 -17 -10 318.050 204.934   3
   2 -17  11 360.327 259.933   1
  -2 -17 -11 642.945 218.441   3
   2  17  11 337.717 214.171   1
   2 -17  12 171.240 265.780   1
   2  17  12 69.2252 245.429   1
  -2 -17 -12 40.7876 169.572   3
   2  17  13 1282.57 364.948   1
   2 -17  13 1105.77 337.063   1
   2 -17  14 2376.17 425.419   1
  -2 -18  15 544.811 260.965   2
   2 -18 -15-228.948 236.673   3
  -2 -18  14 1813.54 362.438   2
  -2  18  14 2821.81 477.751   1
   2 -18 -14 1814.30 363.976   3
   2 -18 -13 790.041 268.539   3
  -2 -18  13 667.022 246.894   2
  -2  18  13 674.132 300.030   1
  -2 -18  13 850.579 240.353   1
   2 -18 -12 267.953 215.658   3
  -2 -18  12 152.354 183.146   1
  -2 -18  12-106.386 186.648   2
  -2  18  12 63.2934 255.285   1
  -2 -18  11 480.155 218.189   2
   2 -18 -11 701.798 237.525   3
  -2 -18  10 2302.81 347.911   2
   2 -18 -10 1959.42 346.324   3
  -2  18   9 167.907 152.653   5
  -2 -18   9-22.5447 167.711   2
   2 -18  -9 443.336 201.468   3
   2 -18  -8 194.740 198.555   3
  -2 -18   8 239.884 198.618   2
  -2  18   8 378.257 161.721   5
  -2  18   7 43.3713 155.987   5
  -2 -18   7-116.845 196.516   2
  -2 -18   6 938.474 229.980   2
  -2  18   6 478.240 174.033   5
  -2  18   5 6811.36 506.240   5
  -2 -18   5 6527.26 452.486   2
   2  18  -4 15211.4 822.098   5
  -2 -18   4 14730.3 669.008   2
  -2  18   4 15379.5 745.212   5
   2 -18  -4 14194.9 667.502   6
   2  18  -3 6612.64 543.057   5
  -2 -18   3 6482.68 436.293   2
   2 -18  -3 6412.36 435.922   6
  -2 -18   2 33.7059 90.6782   6
   2 -18  -2-22.6356 149.033   6
   2  18  -2 348.286 232.003   5
   2  18  -1 2708.49 367.858   5
  -2 -18   1 3313.17 243.955   6
  -2 -18   0 3916.55 259.889   6
   2  18   0 3839.98 421.609   5
   2  18   1 6722.61 545.786   5
   2 -18   2 10523.4 445.950   2
   2  18   2 10238.7 652.088   5
   2  18   3 338.420 206.834   5
   2 -18   3 199.313 113.692   2
   2  18   4 6855.15 550.136   5
   2 -18   4 8017.30 418.350   2
   2  18   5 2343.40 321.795   5
  -2 -18  -5 1770.53 255.539   3
   2 -18   5 2418.31 262.686   2
   2 -18   6 9883.81 509.342   2
  -2 -18  -6 9734.99 578.587   3
   2  18   6 8748.05 601.735   5
   2  18   7 1626.43 301.542   1
   2  18   7 1329.58 275.215   5
  -2 -18  -7 1597.69 266.180   3
   2 -18   7 1805.85 258.167   2
   2  18   8 6012.19 542.392   1
   2 -18   8 6556.41 473.733   2
   2  18   8 5919.96 492.777   5
  -2 -18  -8 6266.64 492.846   3
   2 -18   9 1520.90 277.319   2
   2  18   9 1160.27 282.147   5
   2  18   9 1302.71 293.759   1
  -2 -18  -9 1253.61 258.792   3
   2  18  10 881.831 269.876   1
  -2 -18 -10 1617.12 301.096   3
   2 -18  10 1271.15 269.065   2
   2 -18  10 1520.79 324.471   1
   2  18  11 1748.80 363.986   1
   2 -18  11 1426.67 315.499   1
   2 -18  11 1438.42 293.183   2
  -2 -18 -11 1497.48 303.856   3
  -2 -18 -12 1236.94 268.125   3
   2  18  12 1883.15 381.737   1
   2 -18  12 2288.32 363.813   2
   2 -18  12 1693.81 328.189   1
   2 -18  13 1694.45 375.906   1
   2  18  13 2432.27 423.778   1
  -2 -19  15-22.5416 219.192   2
   2 -19 -14 6111.72 590.132   3
  -2 -19  14 5828.78 547.453   2
  -2 -19  13 794.741 270.823   2
  -2  19  13 402.367 294.771   1
   2 -19 -13 425.270 234.967   3
   2 -19 -12 4419.53 504.312   3
  -2  19  12 4362.34 519.804   1
  -2 -19  12 5369.50 499.910   2
   2 -19 -11 30.6372 191.969   3
  -2 -19  11 168.665 200.701   2
  -2 -19  10 7530.96 564.750   2
   2 -19 -10 6778.19 584.105   3
   2 -19  -9-271.923 213.327   3
  -2  19   9 365.661 191.405   5
  -2 -19   9 218.426 187.884   2
   2 -19  -8 14081.8 790.853   3
  -2 -19   8 15013.9 747.463   2
  -2  19   8 14711.5 722.945   5
  -2  19   7 1406.52 267.114   5
  -2 -19   7 1121.79 243.975   2
  -2 -19   6 2035.14 281.022   2
  -2  19   6 1765.35 286.670   5
  -2  19   5 947.530 227.604   5
  -2 -19   5 927.993 204.168   2
   2  19  -4 1518.85 310.355   5
   2 -19  -4 1272.89 234.690   6
  -2 -19   4 1616.05 258.936   2
  -2  19   4 1783.44 298.379   5
   2 -19  -3 4313.10 368.886   6
   2  19  -3 4027.72 471.562   5
   2 -19  -2 12106.2 603.224   6
   2  19  -2 11187.6 713.678   5
  -2 -19   2 11305.6 451.458   6
  -2 -19   1 749.096 134.306   6
   2  19  -1 942.755 277.481   5
   2 -19  -1 603.534 155.645   6
   2  19   0 2246.35 349.644   5
  -2 -19   0 2026.71 202.012   6
   2  19   1 2456.17 342.180   5
   2 -19   2 28018.0 766.820   2
   2  19   2 28044.1 1124.37   5
   2 -19   3 1106.48 171.946   2
   2  19   3 1005.66 267.858   5
   2  19   4 10822.6 683.874   5
   2 -19   4 11497.1 504.740   2
   2  19   5 2469.05 339.141   5
   2 -19   5 3038.12 281.639   2
  -2 -19  -6 3394.49 364.039   3
   2 -19   6 3029.98 305.212   2
   2  19   6 3123.48 378.532   5
  -2 -19  -7 403.971 162.702   3
   2 -19   7 256.842 160.699   2
   2  19   7 426.633 208.143   5
   2  19   7 419.598 205.228   1
   2 -19   8 7185.95 476.701   2
   2  19   8 5634.33 493.783   5
  -2 -19  -8 6769.43 519.190   3
   2  19   8 5744.87 521.660   1
  -2 -19  -9-73.8874 170.694   3
   2 -19   9 186.865 177.865   2
   2  19   9-214.764 247.305   1
   2  19   9 338.323 219.964   5
   2  19  10 1302.81 325.027   1
   2 -19  10 1704.06 277.942   2
  -2 -19 -10 1087.31 236.076   3
   2 -19  11-26.8615 170.788   2
  -2 -19 -11-119.506 196.210   3
   2  19  11-104.721 212.525   1
  -2 -19 -12 1293.67 270.616   3
   2 -19  12 931.294 268.252   2
   2  19  12 909.264 297.023   1
   2 -19  12 941.299 306.928   1
   2 -19  13 242.068 221.067   2
   2 -19  13 490.659 273.172   1
   2 -20 -14 163.833 220.069   3
  -2 -20  14-267.658 214.976   2
   2 -20 -13 689.380 286.405   3
  -2 -20  13 1351.06 327.617   2
  -2  20  13 1090.64 338.378   1
  -2 -20  12 1766.06 332.667   2
   2 -20 -12 1851.76 353.809   3
  -2  20  12 1703.67 379.256   1
  -2 -20  11 652.534 254.143   2
   2 -20 -11 217.869 205.832   3
  -2 -20  10 465.853 219.979   2
   2 -20 -10 307.194 205.551   3
  -2 -20   9-36.3246 190.901   2
  -2  20   9 610.861 198.263   5
   2 -20  -9 366.282 227.336   3
  -2 -20   8 1594.60 279.834   2
  -2  20   8 1389.37 257.077   5
   2 -20  -8 1471.73 309.873   3
  -2 -20   7 125.815 161.251   2
  -2  20   7 147.109 178.889   5
  -2 -20   6 6072.17 464.515   2
  -2  20   6 5730.79 477.765   5
   2  20  -5-100.342 238.107   5
  -2 -20   5 136.153 154.031   2
  -2  20   5-263.985 208.738   5
  -2 -20   4 9714.05 552.768   2
   2  20  -4 9613.60 692.479   5
   2 -20  -4 10078.9 576.253   6
  -2  20   4 10038.8 648.506   5
  -2  20   3 2264.98 343.187   5
   2 -20  -3 2116.79 274.926   6
   2  20  -3 2384.14 394.166   5
   2  20  -2 6328.18 566.234   5
   2 -20  -2 6268.75 440.155   6
  -2 -20   2 6515.01 344.764   6
   2 -20  -1 890.618 213.752   6
   2  20  -1 1042.55 286.278   5
  -2 -20   1 667.364 131.978   6
   2  20   0 1126.23 273.894   5
   2  20   1 1017.70 289.953   5
   2  20   2 3359.65 425.705   5
   2 -20   3 796.241 158.087   2
   2  20   3 911.213 265.872   5
   2  20   4 4823.77 480.380   5
   2 -20   4 4794.37 336.948   2
   2 -20   5 430.482 131.150   2
   2  20   5 696.431 240.414   5
   2  20   6 4217.54 442.936   5
   2 -20   6 5572.86 387.012   2
  -2 -20  -6 5337.13 463.334   3
   2 -20   7 200.114 147.906   2
   2  20   7 737.581 258.099   5
  -2 -20  -7 153.696 156.259   3
   2  20   7 343.356 216.938   1
  -2 -20  -8 6546.24 520.851   3
   2  20   8 5905.81 508.598   5
   2  20   8 6466.29 551.123   1
   2 -20   8 6263.95 452.478   2
   2  20   9 1561.36 291.058   5
   2 -20   9 1955.87 290.428   2
  -2 -20  -9 1376.15 268.790   3
   2  20   9 1357.96 294.121   1
   2  20  10 2648.56 402.641   1
   2 -20  10 3198.57 365.688   2
  -2 -20 -10 2157.26 333.293   3
   2  20  11-175.704 241.006   1
  -2 -20 -11-425.587 216.336   3
   2  20  12 2562.40 452.645   1
  -2 -21  14 67.1083 225.813   2
  -2 -21  13 2522.03 386.339   2
   2 -21 -13 2992.91 429.725   3
  -2 -21  12 472.146 224.186   2
  -2  21  12-55.5753 243.902   1
   2 -21 -12 276.709 206.625   3
   2 -21 -11 4199.20 484.539   3
  -2 -21  11 3878.35 425.982   2
   2 -21 -10 1608.97 319.090   3
  -2 -21  10 1142.34 276.379   2
  -2  21   9 2766.07 334.483   5
   2 -21  -9 2928.53 399.282   3
  -2 -21   9 2524.94 335.674   2
  -2  21   8 1189.22 249.042   5
  -2 -21   8 1430.96 283.876   2
   2 -21  -8 931.677 254.925   3
  -2  21   7 6978.50 550.772   5
  -2 -21   7 7634.23 525.829   2
   2  21  -6 1397.37 318.748   5
  -2  21   6 1092.93 254.961   5
  -2 -21   6 1742.43 293.370   2
  -2 -21   5 1659.33 268.141   2
  -2  21   5 1215.72 268.102   5
   2  21  -5 982.602 281.288   5
   2  21  -4 756.608 266.903   5
  -2 -21   4 1342.32 262.281   2
  -2  21   4 690.637 225.798   5
   2 -21  -4 959.797 230.689   6
   2  21  -3 5473.10 555.851   5
   2 -21  -3 6322.50 455.040   6
  -2  21   3 6920.88 559.566   5
   2 -21  -2 290.189 173.213   6
   2  21  -2-85.5466 196.424   5
   2  21  -1 11605.2 775.794   5
   2 -21  -1 12561.8 629.197   6
   2  21   0 2733.00 411.735   5
   2  21   1 10077.5 700.770   5
   2  21   2 732.158 272.734   5
   2  21   3 5829.40 541.258   5
   2  21   4 4951.09 500.683   5
   2  21   5 2128.47 370.679   5
  -2 -21  -6 0.10703 173.277   3
   2  21   6-76.3789 219.258   5
   2  21   7 477.616 219.510   5
  -2 -21  -7 494.744 201.378   3
   2  21   7 596.057 245.813   1
   2  21   8 684.908 228.269   5
  -2 -21  -8 749.793 224.230   3
   2  21   8 1511.22 304.840   1
   2  21   9 4564.19 494.101   1
   2  21   9 5028.43 471.048   5
  -2 -21  -9 4378.26 440.588   3
   2  21  10 1815.23 359.075   1
  -2 -21 -10 1839.95 314.387   3
   2  21  11 950.899 288.100   1
   2  21  12-139.334 241.185   1
  -2 -22  13 1485.72 326.491   2
   2 -22 -12 77.4295 232.008   3
  -2 -22  12 2.84074 246.980   2
  -2  22  12-47.4651 244.174   1
   2 -22 -11 350.969 215.612   3
  -2 -22  11 151.594 219.857   2
  -2 -22  10 354.002 236.192   2
   2 -22 -10 1033.99 284.059   3
  -2 -22   9 2559.01 355.235   2
   2 -22  -9 2232.20 379.751   3
  -2 -22   8 700.549 240.459   2
  -2  22   8 494.490 197.734   5
   2 -22  -8 534.061 253.123   3
  -2 -22   7 1667.26 291.357   2
   2  22  -7 1704.38 357.329   5
  -2  22   7 1006.32 254.483   5
  -2 -22   6 1859.26 294.067   2
  -2  22   6 1815.76 326.288   5
   2  22  -6 2035.49 396.874   5
  -2  22   5 4419.81 460.233   5
   2  22  -5 6339.79 601.211   5
  -2 -22   5 5800.87 450.813   2
   2 -22  -4 118.477 156.747   6
  -2  22   4 56.1624 188.180   5
   2  22  -4 614.308 274.997   5
   2 -22  -3 6367.95 470.189   6
   2  22  -3 6717.72 615.179   5
  -2  22   3 7088.72 593.144   5
   2  22  -2 186.476 239.450   5
  -2  22   2 178.101 212.983   5
   2 -22  -2 465.434 180.325   6
   2  22  -1 6627.40 604.622   5
   2 -22  -1 6145.82 448.595   6
   2  22   0-179.481 197.207   5
   2 -22   0-24.7932 161.936   6
   2  22   1 7126.25 616.521   5
   2  22   2-106.721 203.662   5
   2  22   3 8309.59 658.483   5
   2  22   4 50.3324 215.196   5
   2  22   5 1596.52 323.244   5
   2  22   6 686.914 242.322   5
  -2 -22  -6 830.190 233.020   3
  -2 -22  -7 8014.58 574.922   3
   2  22   7 8654.37 653.840   5
   2  22   7 8876.22 634.256   1
   2  22   8 2793.11 400.966   1
   2  22   8 3273.76 408.686   5
  -2 -22  -8 2683.42 357.089   3
   2  22   9 2792.06 409.801   1
  -2 -22  -9 3673.30 404.770   3
   2  22  10 122.086 211.204   1
   2  22  11 1578.42 361.892   1
  -2 -23  11 2878.14 379.403   2
   2 -23 -11 2816.86 424.694   3
  -2 -23  10 4315.54 431.912   2
   2 -23 -10 5172.11 541.841   3
   2 -23  -9 6079.12 572.885   3
  -2 -23   9 6720.73 518.309   2
   2  23  -9 7579.90 685.132   5
   2 -23  -8 2375.19 373.942   3
  -2 -23   8 2839.73 351.431   2
  -2  23   8 2786.54 365.132   5
   2  23  -8 3067.65 475.902   5
  -2  23   7 4819.06 476.930   5
   2  23  -7 5019.25 557.665   5
  -2 -23   7 6192.13 487.445   2
  -2 -23   6 500.724 175.122   2
   2  23  -6 586.292 260.115   5
  -2  23   6 283.064 226.946   5
   2  23  -5 5760.96 599.305   5
  -2  23   5 5194.16 498.516   5
  -2 -23   5 5187.97 430.597   2
  -2  23   4 873.489 279.389   5
   2  23  -4 829.434 267.939   5
   2 -23  -4 1040.10 236.852   6
   2  23  -3 3139.14 453.299   5
   2 -23  -3 4029.20 384.128   6
  -2  23   3 4622.08 492.554   5
   2 -23  -2 1771.50 281.850   6
   2  23  -2 837.720 289.220   5
  -2  23   2 1338.06 328.568   5
   2  23  -1 3135.21 466.150   5
   2 -23  -1 3250.91 339.001   6
   2  23   0 5439.25 566.598   5
   2 -23   0 6138.24 463.265   6
   2  23   1 704.682 274.307   5
   2  23   2 1396.21 342.452   5
   2  23   3 5473.66 539.290   5
   2  23   4 3436.87 447.044   5
   2  23   5 5271.11 533.514   5
  -2 -23  -6 1792.28 323.360   3
   2  23   6 1949.80 360.048   5
  -2 -23  -7 2618.49 353.429   3
   2  23   7 2785.51 396.714   5
   2  23   7 3062.72 391.574   1
  -2 -23  -8-113.248 184.787   3
   2  23   8 328.531 215.651   1
   2  23   8 118.375 207.979   5
   2  23   9 732.638 265.354   1
   2  23  10 58.8037 217.191   1
   2 -24 -11 410.590 257.726   3
   2 -24 -10 49.2357 230.520   3
   2 -24  -9 415.219 271.030   3
   2  24  -9 115.415 248.834   5
   2 -24  -8 1492.07 327.629   3
   2  24  -8 1851.61 379.045   5
  -2  24   8 2210.91 340.837   5
   2  24  -7 2637.72 417.397   5
  -2  24   7 2740.55 379.147   5
   2  24  -6 1746.85 379.603   5
  -2  24   6 1353.31 295.651   5
   2  24  -5 497.092 244.692   5
  -2  24   5 358.835 208.509   5
  -2  24   4 447.149 222.863   5
   2  24  -4 611.453 274.029   5
   2  24  -3 1452.89 344.639   5
  -2  24   3 1298.45 303.263   5
   2 -24  -3 1056.21 233.844   6
   2  24  -2 5692.43 594.714   5
  -2  24   2 6013.60 587.262   5
   2 -24  -2 5702.59 445.874   6
  -2  24   1 1882.07 361.482   5
   2 -24  -1 1799.61 271.825   6
   2  24  -1 1969.97 388.683   5
   2 -24   0 2662.93 315.269   6
   2  24   0 2781.95 425.932   5
   2  24   1 3277.50 455.315   5
   2  24   2 6294.98 599.949   5
   2  24   3 5153.07 526.137   5
   2  24   4 1285.65 313.856   5
   2  24   5 408.990 239.320   5
  -2 -24  -6 2498.87 354.116   3
   2  24   6 1381.41 305.541   5
   2  24   7 541.832 216.128   1
  -2 -24  -7 635.527 216.050   3
   2  24   7 803.027 272.956   5
   2  24   8 2505.68 378.863   1
   2  24   8 2848.00 420.533   5
   2  24   9 1174.59 286.729   1
   2  24  10 1390.80 331.219   1
   2 -25 -10 2618.14 409.746   3
   2 -25  -9-90.8750 235.270   3
   2  25  -8 1239.37 323.547   5
   2 -25  -8 1098.56 298.271   3
   2  25  -7 1384.22 354.182   5
  -2  25   7 511.510 229.300   5
   2  25  -6 7294.23 701.534   5
  -2  25   6 7904.30 632.408   5
   2  25  -5-138.785 272.782   5
  -2  25   5-37.1859 199.318   5
   2  25  -4 5381.63 596.050   5
  -2  25   4 4186.89 492.118   5
   2  25  -3 294.217 270.848   5
  -2  25   3 330.994 242.066   5
   2  25  -2 4224.95 526.124   5
  -2  25   2 3714.31 475.368   5
   2  25  -1 79.3134 259.031   5
  -2  25   1-201.901 210.961   5
   2  25   0 4617.53 551.669   5
   2  25   1-24.5601 231.722   5
   2  25   2 6573.12 630.352   5
   2  25   3 337.310 266.094   5
   2  25   4 4905.10 544.273   5
   2  25   5-146.993 219.839   5
  -2 -25  -5-304.957 220.521   3
  -2 -25  -6 1144.74 265.501   3
   2  25   6 1207.89 318.501   5
   2  25   7 637.865 266.267   5
   2  25   7 192.272 201.084   1
   2  25   8 2982.95 429.909   1
   2 -26  -8 1419.26 323.325   3
  -2  26   7 414.657 200.825   5
  -2  26   6 2653.30 406.425   5
   2  26  -6 2998.64 499.390   5
   2  26  -5 1276.87 349.194   5
  -2  26   5 954.570 267.943   5
  -2  26   4 1971.83 374.850   5
   2  26  -4 1826.83 405.047   5
   2  26  -3 1831.35 383.347   5
  -2  26   3 1673.35 357.281   5
   2  26  -2 543.222 290.284   5
  -2  26   2 76.5905 235.542   5
  -2  26   1 524.159 275.148   5
   2  26  -1-45.8406 271.419   5
  -2  26   0 7415.69 683.212   5
   2  26   0 8032.91 701.869   5
   2  26   1 0.50303 234.995   5
   2  26   2 4635.58 575.261   5
   2  26   3 529.010 290.837   5
   2  26   4 1453.17 358.552   5
   2  26   5-51.2455 237.374   5
  -2 -26  -5 178.881 172.210   3
   2  26   6 2837.78 424.781   5
   2  26   7 304.808 238.901   5
  -2  27   6 16.5120 214.857   5
  -2  27   5 966.447 292.654   5
  -2  27   4 2280.33 403.264   5
  -2  27   3 1603.83 375.585   5
   2  27  -2 3376.44 507.931   5
  -2  27   2 2831.15 443.869   5
   2  27  -1 2781.04 456.792   5
  -2  27   1 3093.95 476.384   5
   2  27   0 273.527 260.888   5
  -2  27   0 515.752 264.627   5
   2  27   1 1641.34 370.174   5
  -2  27  -1 1796.37 402.942   5
   2  27   2 606.469 253.964   5
   2  27   3 4933.11 567.100   5
   2  27   4-205.714 263.434   5
   2  27   5 1655.41 366.969   5
   2  27   6 637.451 293.376   5
  -2  28   6 375.069 247.854   5
  -2  28   5 2107.79 411.246   5
  -2  28   4 94.3536 243.502   5
  -2  28   3 3489.35 483.887   5
  -3   0  19-279.388 263.798   1
  -3   0  18 1597.76 364.726   1
  -3   0  17 320.558 265.752   1
  -3   0  16 4737.18 526.640   1
  -3   0  15-101.206 201.841   1
  -3   0  14 7338.91 600.002   1
  -3   0  13 559.482 222.805   1
  -3   0  12 16498.6 443.981   4
  -3   0  12 17903.9 809.976   1
   3   0 -12 15703.5 372.388   5
   3   0 -11-7.29416 38.6958   5
  -3   0  11-63.2155 58.9800   4
  -3   0  11-219.203 197.296   1
  -3   0  10 11694.1 358.835   4
  -3   0  10 11912.0 587.764   1
   3   0 -10 11168.5 291.313   5
  -3   0   9-35.9975 121.117   1
  -3   0   9 107.794 68.2385   4
   3   0  -9 47.5718 42.6952   5
  -3   0   8 3412.02 188.011   4
  -3   0   8 3243.11 287.212   1
   3   0  -7 15.3029 34.1459   5
  -3   0   7 86.2258 115.103   1
  -3   0   7 39.3822 65.1027   4
  -3   0   6 4853.92 210.254   4
   3   0  -6 4155.61 134.462   5
  -3   0   6 5138.13 291.636   3
  -3   0   6 4622.56 268.625   1
  -3   0   5-5.51189 73.3733   3
  -3   0   5-0.68754 57.8412   4
   3   0  -5 119.894 119.215   3
   3   0  -5 10.2427 35.7841   5
  -3   0   4 166884. 2384.04   6
  -3   0   4 160423. 2303.96   4
   3   0  -4 168040. 2316.47   4
   3   0  -4 164307. 2184.16   5
   3   0  -4 163952. 2399.68   3
  -3   0   4 162302. 2181.79   5
  -3   0   4 160224. 2380.62   3
   3   0  -3 48.5697 77.9067   6
   3   0  -3-64.9884 78.4994   3
  -3   0   3 1.99511 50.3176   5
   3   0  -3-2.58603 81.2887   4
  -3   0   3 210.860 91.4060   4
  -3   0   3 49.1450 69.4231   6
  -3   0   3-17.0468 69.8850   3
   3   0  -3 98.5402 60.4986   5
   3   0  -2 959701. 12117.1   3
   3   0  -2 964542. 12240.9   4
  -3   0   2 963274. 12231.2   4
   3   0  -2 970339. 12173.0   5
   3   0  -2 999999. 12163.2   2
  -3   0   2 952239. 12166.4   2
  -3   0   2 930482. 12162.0   5
  -3   0   1 94.5789 59.7486   1
   3   0  -1 46.5804 90.6582   4
   3   0  -1 91.2612 64.8070   2
  -3   0   1 82.1969 72.9011   5
   3   0  -1-41.5045 96.6511   5
  -3   0   0 6709.26 250.451   1
   3   0   0 7134.53 256.818   1
   3   0   0 7329.92 293.483   4
  -3   0   0 7291.32 279.617   5
   3   0   0 6898.33 293.522   5
   3   0   1-35.9066 90.3621   1
  -3   0  -1 112.264 99.1632   5
  -3   0  -1 96.9314 71.3611   1
   3   0   1-46.5176 104.223   5
  -3   0  -2 2370.54 182.695   1
   3   0   2 2046.43 190.851   1
   3   0   2 2490.49 209.324   5
  -3   0  -2 2535.60 192.439   5
  -3   0  -3-25.1358 94.7592   1
   3   0   3-13.0396 107.617   1
  -3   0  -3 20.3262 91.5698   5
  -3   0  -4 22295.2 641.396   5
   3   0   4 22067.3 718.172   1
  -3   0  -4 22221.2 669.485   1
   3   0   5-116.544 149.330   1
  -3   0  -5 18.7091 97.2259   5
   3   0   6 984.351 213.264   1
   3   0   7 112.637 159.578   1
   3   0   8 42870.1 1281.51   1
   3   0   9-7.81049 191.364   1
   3   0  10-57.3008 234.741   1
   3   0  11-184.853 222.325   1
   3   0  12 14331.5 853.956   1
   3   0  13-59.4974 231.071   1
   3   0  14 6632.56 652.180   1
   3   0  15-60.4977 259.642   1
   3   0  16 6110.28 671.336   1
  -3  -1  19 200.665 256.978   1
  -3   1  19 31.9989 262.537   1
  -3   1  18 480.432 282.279   1
  -3  -1  18 603.393 284.292   1
  -3  -1  17-298.973 266.493   1
  -3   1  17 126.407 234.030   1
  -3  -1  16-503.603 267.509   1
  -3   1  16 247.417 228.819   1
  -3   1  15 319.986 199.757   1
  -3  -1  15 35.2358 215.570   1
  -3   1  14-141.335 225.253   1
  -3  -1  14-95.1910 242.393   1
  -3   1  13 54.3217 175.049   1
  -3  -1  13 135.909 186.462   1
   3   1 -12 450.515 82.2442   5
  -3   1  12 554.433 227.728   1
  -3  -1  12 393.348 202.411   1
  -3  -1  12 207.985 54.7555   4
   3  -1 -12 142.604 33.8519   5
  -3   1  12 259.268 93.4308   4
   3   1 -11 514.664 82.6474   5
  -3  -1  11 306.595 62.3717   4
  -3   1  11 259.373 171.642   1
   3  -1 -11 200.870 35.4643   5
  -3   1  11 434.368 94.4214   4
  -3  -1  11 209.216 159.102   1
  -3   1  10 2108.20 167.937   4
  -3  -1  10 1984.16 127.464   4
   3  -1 -10 1599.91 76.3813   5
  -3   1  10 2095.67 299.468   1
  -3  -1  10 2076.63 270.650   1
  -3  -1   9 802.769 174.453   1
  -3   1   9 785.555 184.939   1
  -3  -1   9 744.514 86.8358   4
  -3   1   9 780.671 114.653   4
  -3   1   8 5136.35 355.351   1
  -3   1   8 4589.84 236.959   4
  -3  -1   8 4811.29 336.056   1
  -3  -1   8 4746.41 193.803   4
  -3  -1   7 6879.77 354.681   1
  -3   1   7 6231.55 359.142   1
  -3   1   7 6158.83 269.465   4
  -3  -1   7 6977.71 233.333   4
   3  -1  -7 6339.26 380.628   3
   3   1  -6 9523.63 261.173   5
  -3  -1   6 9693.05 383.717   1
  -3  -1   6 9564.07 283.242   4
  -3  -1   6 10174.3 402.561   3
  -3   1   6 10331.6 419.903   3
   3  -1  -6 9928.54 433.944   3
  -3   1   6 9295.34 321.840   4
  -3   1   5 20293.7 491.782   4
   3   1  -5 20315.4 416.981   5
  -3  -1   5 20228.5 534.126   1
  -3   1   5 21092.5 570.198   6
   3   1  -5 19171.0 449.457   4
  -3  -1   5 20907.1 561.314   3
  -3  -1   5 20010.5 450.977   4
   3  -1  -5 20862.7 591.596   3
  -3   1   5 21708.7 579.868   3
  -3   1   4 27291.9 625.556   3
  -3  -1   4 30415.1 623.551   6
   3   1  -4 27462.7 562.861   4
  -3   1   4 27567.2 633.361   6
  -3  -1   4 25486.4 512.144   5
   3  -1  -4 25923.0 440.121   5
   3  -1  -4 28317.4 645.560   3
   3  -1  -4 24146.5 574.681   4
  -3   1   4 25322.6 439.788   5
   3   1  -4 27632.4 514.859   5
  -3  -1   4 27440.9 548.554   4
  -3  -1   4 27501.9 607.450   3
  -3   1   4 25489.1 573.185   4
  -3  -1   3 36993.3 702.131   4
   3  -1  -3 38258.9 731.750   3
  -3  -1   3 37404.9 664.205   5
   3  -1  -3 38018.6 752.640   6
   3   1  -3 37662.2 669.088   5
  -3   1   3 37834.3 736.852   6
   3  -1  -3 37226.4 737.494   4
   3   1  -3 36945.0 691.248   3
  -3   1   3 37467.7 731.972   4
  -3  -1   3 37839.9 731.992   2
  -3  -1   3 36728.0 687.353   6
   3   1  -3 36456.8 703.586   4
  -3   1   3 36775.3 626.537   5
  -3   1   3 36580.4 678.552   2
  -3  -1   3 37211.8 683.538   3
   3  -1  -3 37819.1 631.293   5
   3   1  -2 81418.9 1207.98   6
  -3  -1   2 81956.5 1293.26   2
  -3   1   2 82986.0 1211.21   2
   3  -1  -2 82084.4 1203.10   2
  -3   1   2 80712.3 1242.87   5
  -3  -1   2 80956.2 1171.89   3
   3   1  -2 82621.5 1274.56   5
  -3  -1   2 82963.4 1266.16   5
   3  -1  -2 80390.7 1319.31   4
  -3   1   2 75561.7 1315.08   4
   3   1  -2 81846.6 1305.87   4
   3   1  -2 84246.3 1176.19   3
   3   1  -2 81555.8 1282.50   2
  -3   1   1 79117.6 1249.38   4
  -3  -1   1 73597.8 1212.97   5
   3   1  -1 77646.7 1233.32   5
   3  -1  -1 75809.7 1250.83   4
  -3   1   1 75307.4 1212.74   5
  -3   1   1 72793.9 1189.93   1
   3   1  -1 74171.8 1098.96   1
   3  -1  -1 74244.9 1133.31   2
  -3  -1   1 75292.0 1096.29   1
   3  -1  -1 74599.0 1220.95   5
   3   1  -1 78942.6 1200.98   2
  -3   1   0 3180.55 190.813   1
   3   1   0 3616.47 216.743   5
  -3  -1   0 3149.68 163.439   1
  -3  -1   0 3662.72 200.994   5
   3   1   0 3515.36 167.345   1
  -3   1   0 3845.82 208.337   5
   3  -1   0 3761.96 210.631   4
  -3   1   0 3591.36 204.638   4
   3  -1   0 3585.97 203.159   1
  -3   1  -1 13937.8 431.457   5
  -3   1  -1 13009.2 406.355   1
   3  -1   1 12732.5 430.451   1
   3  -1   1 13325.4 415.576   4
   3   1   1 12718.0 397.856   1
  -3  -1  -1 13427.6 386.656   1
   3   1   1 13290.9 439.840   5
  -3  -1  -1 13447.8 420.337   5
   3   1   2 8888.64 376.673   5
  -3   1  -2 9470.88 368.913   5
  -3  -1  -2 9449.12 362.864   5
   3   1   2 9281.27 362.842   1
  -3   1  -2 8710.59 362.017   1
   3  -1   2 9026.34 349.930   4
  -3  -1  -2 9084.82 344.585   1
   3  -1   2 9161.72 383.906   1
  -3  -1  -3 3855.03 248.714   1
   3   1   3 4259.45 277.605   5
  -3  -1  -3 4220.27 253.666   5
   3  -1   3 3783.41 282.346   1
  -3   1  -3 3844.10 259.038   1
  -3   1  -3 4305.85 263.775   5
   3   1   3 3754.32 273.178   1
   3   1   4 215.913 122.680   5
   3   1   4-121.628 146.801   1
  -3   1  -4-19.6576 102.267   5
  -3  -1  -4 33.6076 96.0110   1
  -3  -1  -4 149.358 98.7251   5
   3  -1   4-127.562 157.405   1
   3  -1   5 4166.57 338.085   1
  -3   1  -5 3825.04 263.691   5
   3   1   5 3739.80 312.424   1
  -3  -1  -5 3986.60 266.389   5
   3   1   6 863.447 195.013   1
   3  -1   6 1197.57 253.118   1
   3   1   7 7782.24 514.101   1
   3  -1   7 8790.75 529.270   1
   3  -1   8 5042.17 433.797   1
   3   1   8 4865.92 426.268   1
   3   1   9 1001.28 257.611   1
   3  -1   9 1230.44 251.117   1
   3  -1  10 1797.97 331.681   1
   3   1  10 1730.37 331.570   1
   3  -1  11 200.839 119.119   4
   3  -1  11 432.257 240.731   1
   3   1  11 127.440 217.612   1
   3  -1  12 190.683 245.985   1
   3   1  12 392.423 254.680   1
   3   1  13 100.824 239.517   1
   3  -1  13 400.703 271.294   1
   3   1  14 1090.63 352.691   1
   3  -1  14 1423.72 359.071   1
   3  -1  15 80.3267 279.572   1
   3   1  15-35.1314 244.106   1
   3  -1  16 2326.04 485.266   1
   3   1  16 3128.16 531.882   1
  -3  -2  19 3526.99 504.975   1
  -3   2  19 2984.29 520.204   1
  -3   2  18 2257.68 446.921   1
  -3  -2  18 1887.76 395.859   1
  -3   2  17 1889.25 363.336   1
  -3  -2  17 1897.79 397.785   1
  -3   2  16 706.845 279.984   1
  -3  -2  16 564.702 253.898   1
  -3   2  15 2113.81 373.528   1
  -3  -2  15 1400.61 307.633   1
  -3   2  14 6118.29 539.627   1
  -3  -2  14 6306.90 537.711   1
  -3  -2  13 10445.0 651.832   1
  -3   2  13 10242.6 672.907   1
  -3   2  12 2970.54 222.282   4
   3   2 -12 2980.80 183.727   5
  -3  -2  12 3387.14 386.472   1
  -3   2  12 2810.34 363.148   1
  -3  -2  11 36021.3 1109.12   1
  -3   2  11 37508.8 803.977   4
  -3   2  11 35722.1 1143.73   1
  -3  -2  10 10966.3 555.927   1
  -3   2  10 11016.6 595.948   1
  -3  -2  10 9259.58 239.193   4
  -3   2  10 11262.6 407.693   4
  -3   2   9 23926.6 616.333   4
  -3   2   9 23446.0 829.423   1
  -3  -2   9 22049.2 430.157   4
  -3  -2   9 24263.0 793.884   1
  -3  -2   8 29625.4 826.827   1
  -3  -2   8 27898.8 512.146   4
  -3   2   8 27970.5 860.987   1
   3  -2  -8 29486.1 891.965   3
  -3   2   8 26338.0 659.738   4
  -3   2   7 16.1673 63.2470   4
  -3  -2   7 0.59684 44.3904   4
  -3  -2   7-176.953 103.170   1
   3  -2  -7 20.8041 136.432   3
  -3   2   7-0.48594 144.729   1
   3   2  -6-14.3047 67.1666   5
  -3   2   6 388.796 134.979   6
   3   2  -6-23.9815 53.2833   4
  -3  -2   6 233.308 97.6322   3
  -3   2   6 149.349 71.3428   4
  -3  -2   6 1.51093 50.1660   4
   3  -2  -6 449.911 157.714   3
  -3  -2   6-117.918 116.395   1
  -3   2   6 314.094 125.716   3
   3  -2  -5 5669.76 310.075   3
  -3   2   5 5822.67 297.458   3
   3   2  -5 5703.09 202.703   4
  -3   2   5 4904.29 253.917   4
  -3   2   5 5761.56 295.115   6
   3   2  -5 5559.38 223.016   5
  -3  -2   5 5670.21 277.577   3
  -3  -2   5 5756.56 258.787   1
   3  -2  -4 24972.4 624.041   3
  -3   2   4 22866.4 409.162   5
  -3   2   4 23643.5 568.328   4
   3  -2  -4 24572.1 625.541   6
   3   2  -4 24388.2 516.281   5
  -3  -2   4 24151.0 501.979   1
   3   2  -4 25205.9 511.374   4
  -3   2   4 24314.9 604.608   6
  -3  -2   4 24672.4 607.492   2
  -3  -2   4 23927.9 557.022   3
  -3  -2   3 94.4465 64.6098   3
  -3   2   3 162.936 55.0815   5
   3   2  -3 109.746 72.5004   5
  -3  -2   3 236.179 78.8185   5
   3  -2  -3 121.853 97.9162   6
   3  -2  -3 257.910 97.8268   4
  -3  -2   3 183.279 64.7513   6
  -3   2   3 137.144 78.3871   4
  -3  -2   3 428.031 125.390   2
   3   2  -3 206.598 91.9032   2
   3   2  -3 155.093 75.9724   4
   3   2  -2 2852.14 181.995   2
   3   2  -2 2797.62 176.487   5
  -3  -2   2 2827.41 168.420   5
  -3  -2   2 2439.15 191.356   2
  -3   2   2 2774.41 150.426   5
   3  -2  -2 2738.57 122.656   2
   3  -2  -2 3011.21 193.726   4
  -3   2   2 2903.92 180.759   4
  -3  -2   2 2954.35 121.335   3
  -3   2   2 3191.95 135.798   2
   3   2  -2 2859.10 127.945   6
  -3   2   1 157401. 2241.74   4
   3   2  -1 148234. 2023.33   1
  -3  -2   1 148486. 2017.62   1
   3   2  -1 159166. 2248.90   5
  -3  -2   1 160371. 2230.91   5
  -3   2   1 152922. 2214.05   1
   3  -2  -1 158237. 2257.93   4
   3   2  -1 158342. 2213.60   2
   3   2   0 13925.1 337.358   1
   3   2   0 14901.6 439.861   5
  -3  -2   0 13313.9 323.033   1
  -3   2   0 13512.6 415.606   1
  -3  -2   0 14998.2 428.253   5
  -3   2   0 14036.6 405.169   4
   3  -2   0 13681.6 412.970   4
   3  -2   0 13619.0 421.799   1
   3  -2   1 50696.2 969.217   4
  -3  -2  -1 50036.1 897.587   1
   3  -2   1 52249.8 1022.40   1
  -3  -2  -1 51187.4 981.973   5
  -3   2  -1 53525.3 964.108   4
   3   2   1 50602.7 1009.29   5
  -3   2  -1 51142.6 987.177   1
   3   2   1 51725.8 774.805   3
   3   2   1 49161.8 921.214   1
  -3  -2  -2 2448.70 194.002   5
   3  -2   2 2446.19 225.284   1
  -3   2  -2 2577.75 215.343   1
   3  -2   2 2450.95 185.263   4
  -3  -2  -2 2157.35 171.262   1
   3   2   2 2436.13 191.384   1
   3   2   2 2753.91 148.136   3
   3   2   2 2465.79 217.082   5
   3   2   3 346.576 133.340   1
  -3   2  -3 432.541 112.106   5
  -3  -2  -3 582.378 130.352   5
  -3  -2  -3 355.381 103.338   1
   3   2   3 531.964 128.436   5
   3   2   3 361.500 82.6626   3
   3  -2   3 279.503 102.798   4
   3  -2   3 306.213 137.630   1
  -3   2  -3 91.2546 101.010   1
  -3   2  -4 3215.01 244.060   5
  -3  -2  -4 3539.07 240.445   5
   3   2   4 2795.69 250.441   5
   3  -2   4 2860.29 209.471   4
   3   2   4 3317.57 275.638   1
   3  -2   4 3692.39 300.210   1
  -3  -2  -4 3301.91 249.894   1
   3   2   4 2907.22 199.342   3
   3  -2   5 29483.0 926.617   1
  -3  -2  -5 30705.4 771.446   5
   3   2   5 29669.9 737.032   3
   3  -2   5 27427.0 717.026   4
   3   2   5 29514.6 887.740   1
   3   2   5 28218.3 813.224   5
   3  -2   6 8361.18 366.991   4
   3  -2   6 9167.18 527.891   1
   3   2   6 7937.39 491.144   1
   3  -2   7 23883.3 909.448   1
   3  -2   7 22877.5 649.978   4
   3   2   7 22999.6 879.575   1
   3   2   8 2092.39 293.239   1
   3  -2   8 2000.06 202.095   4
   3  -2   8 2154.27 332.585   1
   3   2   9 18621.3 867.243   1
   3  -2   9 18600.4 875.249   1
   3  -2   9 17921.9 586.840   4
   3  -2  10 15590.7 848.044   1
   3  -2  10 14655.4 529.187   4
   3   2  10 15408.6 839.255   1
   3  -2  11 2635.91 394.847   1
   3   2  11 2523.37 381.169   1
   3  -2  11 2523.18 220.685   4
   3   2  12 5594.37 557.645   1
   3  -2  12 5694.38 560.334   1
   3  -2  13 1873.22 391.054   1
   3   2  13 1482.97 346.432   1
   3   2  14 941.802 327.021   1
   3  -2  14 476.196 243.385   1
   3   2  15 2946.25 481.069   1
   3  -2  15 3800.68 530.459   1
   3  -2  16-115.255 263.415   1
   3   2  16 477.972 324.133   1
  -3   3  19-642.790 324.101   1
  -3  -3  19 25.0490 252.191   1
  -3  -3  18-191.620 228.900   1
  -3   3  18-167.422 240.570   1
  -3  -3  17 260.048 250.362   1
  -3   3  17 335.664 237.733   1
  -3  -3  16 35.2383 196.627   1
  -3   3  16-117.285 221.954   1
  -3  -3  15 569.508 241.045   1
  -3   3  15 730.594 276.183   1
  -3   3  14 1519.45 327.598   1
  -3  -3  14 1520.92 304.320   1
  -3  -3  13 1359.74 266.875   1
  -3   3  13 910.904 255.898   1
  -3  -3  12 86.9767 158.338   1
  -3   3  12 396.097 217.779   1
  -3  -3  11 3796.14 374.984   1
  -3   3  11 3457.36 365.511   1
  -3   3  10 42.8166 159.283   1
  -3  -3  10 164.966 139.873   1
  -3   3   9 268.183 174.640   1
  -3  -3   9-30.2928 131.349   1
   3  -3  -9 245.473 180.913   3
  -3   3   8 12584.4 574.388   1
   3  -3  -8 13133.5 589.612   3
  -3  -3   8 12648.2 523.863   1
  -3  -3   7 5692.01 303.172   1
   3  -3  -7 7031.23 408.953   3
   3   3  -7 6178.27 309.488   1
   3   3  -6 2214.89 195.394   1
   3   3  -6 1916.44 106.724   4
  -3   3   6 2010.83 205.442   3
  -3  -3   6 2374.19 212.481   1
   3  -3  -6 2001.65 225.434   3
  -3   3   6 1671.46 184.897   6
  -3   3   5 7607.82 317.682   4
   3   3  -5 6939.03 279.614   5
   3   3  -5 7608.75 276.675   1
  -3  -3   5 8024.08 296.849   1
   3  -3  -5 7238.65 363.366   3
   3   3  -5 7831.73 239.864   4
  -3   3   5 7805.78 350.702   6
   3   3  -4 4106.90 220.900   5
  -3   3   4 4066.85 240.809   4
  -3  -3   4 4402.08 265.356   2
   3  -3  -4 4767.44 275.229   6
   3  -3  -4 4619.37 271.106   3
  -3   3   4 4699.95 259.658   6
  -3  -3   4 4719.61 187.590   1
  -3  -3   3 14908.6 418.001   5
   3   3  -3 15101.9 440.501   2
  -3  -3   3 15534.5 475.341   2
   3   3  -3 15560.8 435.520   5
  -3   3   3 13448.6 430.925   4
   3  -3  -3 13988.9 461.890   6
  -3   3   2 46416.7 894.413   4
  -3  -3   2 45293.9 900.054   2
   3   3  -2 47391.2 889.654   5
  -3   3   2 46076.0 695.477   2
   3   3  -2 44862.1 880.175   2
  -3  -3   2 48051.5 879.554   5
   3  -3  -2 47614.4 919.011   4
   3   3  -1 20336.7 535.126   5
   3   3  -1 19645.4 499.792   2
  -3  -3   1 20491.9 513.326   5
   3  -3  -1 19526.3 529.530   4
  -3   3   1 20427.9 523.825   4
   3  -3   0 7645.76 324.987   1
   3  -3   0 7795.53 310.180   4
   3   3   0 7469.25 317.844   5
   3   3   0 7847.16 232.750   1
  -3   3   0 7610.21 314.563   1
  -3  -3   0 7297.60 300.447   5
  -3   3   0 7595.50 304.655   4
  -3  -3   0 7153.03 215.065   1
  -3  -3  -1 9360.41 306.369   1
   3   3   1 9856.84 234.297   3
   3   3   1 10166.3 388.898   5
   3  -3   1 10370.0 359.065   4
  -3  -3  -1 10100.8 367.127   5
   3   3   1 9988.29 322.539   1
   3  -3   1 10375.0 410.131   1
  -3   3  -1 10142.7 351.650   4
  -3   3  -1 9794.95 375.082   1
  -3  -3  -2 9369.15 342.230   1
  -3  -3  -2 9818.73 372.208   5
   3   3   2 10077.8 405.526   5
   3  -3   2 10009.2 425.691   1
   3  -3   2 9476.53 352.061   4
  -3   3  -2 9153.20 386.983   1
  -3   3  -2 10017.6 349.152   4
   3   3   2 9849.00 284.581   3
   3   3   2 9244.51 357.284   1
   3  -3   3 28714.1 682.652   4
  -3  -3  -3 28745.6 717.746   1
   3   3   3 29186.7 769.189   5
  -3  -3  -3 28877.7 720.458   5
  -3   3  -3 29710.1 771.390   1
   3   3   3 28857.3 626.401   3
   3   3   3 29493.1 752.009   1
   3  -3   3 29496.3 824.648   1
   3   3   4 9287.01 424.197   5
   3  -3   4 9137.26 471.011   1
   3   3   4 8307.14 428.809   1
  -3  -3  -4 9347.57 410.890   1
   3  -3   4 9058.61 359.373   4
   3   3   4 9155.02 348.905   3
  -3  -3  -4 9217.94 384.553   5
   3  -3   5 3686.49 342.579   1
  -3  -3  -5 4262.04 267.981   5
   3  -3   5 4104.31 248.775   4
   3   3   5 4185.24 302.795   5
   3   3   5 3952.73 329.866   1
   3   3   5 4136.51 256.286   3
   3   3   6 395.961 172.833   5
   3  -3   6 207.545 91.9222   4
   3  -3   6-84.4576 151.849   1
   3   3   6 82.0263 177.341   1
   3  -3   7 7500.31 339.455   4
   3   3   7 7348.90 497.791   1
   3  -3   7 7545.20 508.889   1
   3  -3   8 384.825 214.621   1
   3  -3   8 171.217 117.339   4
   3   3   8 249.436 184.384   1
   3   3   9 1665.74 316.664   1
   3  -3   9 1107.68 152.004   4
   3  -3   9 1608.62 302.951   1
   3   3  10 342.536 237.104   1
   3  -3  10 36.7643 213.857   1
   3  -3  10 144.421 97.8258   4
   3  -3  11 10221.5 710.728   1
   3   3  11 9413.32 707.556   1
   3  -3  11 10432.9 415.029   4
   3   3  12 174.988 231.441   1
   3  -3  12 267.626 222.078   1
   3   3  13 1216.68 322.726   1
   3  -3  13 1138.55 335.529   1
   3  -3  14 1361.94 337.442   1
   3   3  14 2057.16 405.390   1
   3   3  15 1656.69 405.338   1
   3  -3  15 1657.87 373.321   1
   3  -3  16 241.200 278.936   1
   3   3  16-239.063 271.524   1
  -3  -4  19 3531.50 505.559   1
  -3  -4  18 223.075 248.201   1
  -3   4  18 678.031 323.033   1
  -3  -4  17 1328.84 343.577   1
  -3   4  17 1184.17 345.176   1
  -3   4  16 168.561 211.058   1
  -3  -4  16 554.535 256.158   1
  -3  -4  15 5876.71 536.336   1
  -3   4  15 5106.72 533.293   1
  -3  -4  14 907.740 257.405   1
  -3   4  14 1162.00 290.722   1
  -3   4  13 10252.1 685.413   1
  -3  -4  13 11122.2 665.303   1
  -3   4  12 258.583 204.739   1
  -3  -4  12 281.539 180.105   1
  -3   4  11 7464.20 546.837   1
  -3  -4  11 6711.28 467.830   1
  -3  -4  10 21471.9 796.177   1
   3  -4 -10 21090.1 833.456   3
  -3   4  10 21522.0 850.707   1
  -3   4   9 14005.7 646.747   1
   3  -4  -9 13612.9 634.485   3
  -3  -4   9 14107.1 592.417   1
  -3  -4   8 7432.77 398.851   1
   3  -4  -8 7552.46 452.233   3
   3   4  -7 98077.7 1594.73   1
   3  -4  -7 96713.0 1805.06   3
   3   4  -6 5595.79 267.546   1
   3   4  -6 5253.77 175.535   4
   3  -4  -6 5441.65 342.598   3
  -3  -4   6 5271.07 265.512   1
  -3   4   5 55434.7 1135.63   6
   3   4  -5 55642.5 965.186   1
   3  -4  -5 56505.3 1176.54   3
   3   4  -5 55249.1 1043.84   5
   3   4  -5 56041.1 911.630   4
  -3  -4   5 55751.3 1000.85   1
   3  -4  -4 2685.52 231.958   6
  -3  -4   4 2975.35 251.650   2
   3   4  -4 2958.74 229.101   5
  -3   4   4 2980.76 222.914   6
  -3   4   4 2560.22 198.773   4
   3   4  -4 2975.12 157.274   1
  -3  -4   4 2887.01 143.644   1
  -3  -4   3 20496.3 565.578   2
   3   4  -3 20474.6 541.478   5
  -3   4   3 20162.0 552.907   4
  -3  -4   3 19448.6 349.666   1
   3   4  -3 20418.6 540.628   2
   3  -4  -3 19607.1 565.334   6
   3   4  -3 19808.1 342.907   1
   3   4  -2 15232.3 460.356   5
  -3  -4   2 15202.3 446.391   5
  -3   4   2 15207.1 453.790   4
  -3  -4   2 14176.6 455.514   2
   3   4  -2 14674.9 435.892   2
   3   4  -1 6875.34 300.025   2
   3   4  -1 7024.17 314.314   5
  -3  -4   1 7197.85 305.345   5
  -3   4   1 7225.25 305.916   4
   3  -4  -1 7345.68 317.453   4
  -3  -4   0 227.329 100.123   5
   3   4   0 196.221 110.861   5
   3  -4   0 141.682 98.7724   4
  -3   4   0 175.073 89.5447   4
   3   4   0 253.629 68.4018   1
  -3   4   0 275.507 105.290   1
   3   4   1 11526.9 350.029   1
  -3   4  -1 11540.5 422.994   1
  -3   4  -1 11554.5 381.860   4
   3   4   1 10773.8 417.668   5
  -3  -4  -1 11581.2 271.140   3
   3  -4   1 11813.1 453.962   1
  -3  -4  -1 11245.7 336.808   1
   3  -4   1 10942.7 392.783   4
  -3  -4  -1 12023.7 409.702   5
  -3  -4  -2 12709.0 341.028   3
   3   4   2 12840.8 338.278   3
   3   4   2 12598.6 475.147   5
  -3   4  -2 13615.9 492.471   1
  -3   4  -2 13328.0 415.719   4
  -3  -4  -2 12305.4 436.101   5
   3  -4   2 13213.6 430.115   4
   3   4   2 12240.2 421.957   1
  -3  -4  -2 12558.4 408.535   1
   3  -4   2 18123.6 614.199   1
   3   4   3 66700.8 1139.47   3
   3   4   3 67173.0 1289.36   1
   3  -4   3 64325.2 1401.67   1
   3   4   3 66551.3 1324.53   5
  -3   4  -3 67895.7 1197.21   4
  -3   4  -3 67682.9 1338.17   1
   3  -4   3 67098.8 1213.60   4
  -3  -4  -3 66464.4 1270.04   5
  -3  -4  -3 66708.3 1253.70   1
   3   4   4 40099.7 990.713   5
   3   4   4 40833.7 997.042   1
  -3  -4  -4 40721.9 926.727   5
   3   4   4 40908.9 852.646   3
   3  -4   4 39238.0 1077.48   1
   3  -4   4 40494.3 859.560   4
   3   4   5 17639.3 539.552   3
   3   4   5 17038.1 658.262   1
   3  -4   5 16801.3 508.222   4
   3   4   5 17271.5 629.145   5
   3  -4   5 18577.1 720.658   1
  -3  -4  -5 17286.1 559.449   5
   3  -4   6 9292.33 536.927   1
   3   4   6 9031.58 447.956   5
   3   4   6 8719.77 489.226   1
   3  -4   6 8599.09 350.616   4
   3   4   7 16784.3 644.276   5
   3  -4   7 16816.4 780.305   1
   3   4   7 15855.7 730.691   1
   3  -4   7 16017.2 507.978   4
   3  -4   8 18407.6 552.403   4
   3  -4   8 19415.2 862.447   1
   3   4   8 19674.9 829.319   1
   3  -4   9 9383.15 379.058   4
   3   4   9 9902.33 644.308   1
   3  -4   9 11098.8 671.118   1
   3   4  10 194.029 225.773   1
   3  -4  10 535.441 236.333   1
   3  -4  10 342.478 102.754   4
   3  -4  11 6644.84 588.511   1
   3   4  11 6692.22 599.604   1
   3   4  12 1505.51 349.242   1
   3  -4  12 1383.67 323.975   1
   3   4  13 6087.79 611.876   1
   3  -4  13 6407.13 621.476   1
   3   4  14 419.210 273.618   1
   3  -4  14 436.602 252.195   1
   3  -4  15 1138.24 327.268   1
   3   4  15 1503.12 368.503   1
   3  -4  16 209.936 275.917   1
   3   4  16-231.877 278.262   1
  -3  -5  19 346.527 255.821   1
  -3   5  18-500.155 285.424   1
  -3  -5  18 344.915 265.174   1
  -3   5  17-407.822 298.879   1
  -3  -5  17 554.309 263.156   1
  -3   5  16 215.340 249.546   1
  -3  -5  16 114.008 205.544   1
  -3   5  15 2.97728 213.993   1
  -3  -5  15-198.226 223.971   1
  -3  -5  14-200.423 203.914   1
  -3   5  14 374.044 219.517   1
  -3  -5  13-118.318 194.566   1
  -3   5  13 40.0961 185.645   1
  -3   5  12 3605.46 407.902   1
  -3  -5  12 3946.11 403.971   1
  -3   5  11 607.192 214.697   1
  -3  -5  11 767.272 193.761   1
   3  -5 -11 963.387 225.879   3
  -3   5  10 178.151 177.333   1
  -3  -5  10 387.713 178.431   1
   3  -5 -10-133.536 169.418   3
   3  -5  -9 2266.60 274.474   3
  -3  -5   9 2340.57 251.932   1
  -3   5   9 1861.96 269.579   1
  -3  -5   8 2283.14 229.463   1
   3  -5  -8 2409.00 269.874   3
  -3  -5   7 8754.22 388.150   1
   3   5  -7 8423.37 353.517   1
  -3   5   7 7748.29 184.333   5
   3  -5  -7 7731.24 434.353   3
  -3   5   6 647.465 67.9014   5
   3   5  -6 817.254 117.795   1
   3   5  -6 584.555 73.1822   4
   3  -5  -6 766.601 187.151   3
  -3  -5   6 435.540 85.0465   1
  -3  -5   5 20339.4 646.970   2
  -3  -5   5 20074.2 503.482   1
   3   5  -5 20457.9 488.393   1
   3  -5  -5 20108.2 650.229   6
  -3   5   5 21683.6 637.537   6
   3  -5  -5 21867.6 662.880   3
  -3  -5   4 1795.25 106.058   1
   3  -5  -4 2141.71 218.393   6
   3   5  -4 2010.83 118.916   1
  -3  -5   4 1878.28 192.532   2
   3   5  -4 2066.16 191.011   5
   3   5  -3 446.646 127.564   5
   3  -5  -3 647.115 144.017   6
  -3  -5   3 343.322 48.6166   1
   3   5  -3 344.824 45.6462   1
  -3   5   3 501.317 122.830   4
  -3  -5   3 257.914 110.130   2
   3   5  -3 463.496 103.016   2
   3   5  -2 139.072 108.300   5
  -3  -5   2 89.1311 86.2420   5
  -3   5   2 45.0542 87.8793   4
  -3  -5   2-29.4284 109.937   2
   3   5  -2 56.4099 88.3092   2
   3   5  -1 760.249 133.868   2
  -3  -5   1 948.950 135.667   5
   3   5  -1 978.446 163.075   5
  -3   5   1 788.842 121.897   4
  -3   5   0 64760.7 1187.31   4
   3   5   0 62513.9 1229.93   5
   3  -5   0 62584.6 1192.77   4
  -3  -5   0 67665.4 1224.42   5
  -3   5   0 66295.1 1237.22   1
   3   5   0 65018.6 1012.04   1
   3  -5   1 5266.68 325.699   1
  -3  -5  -1 5338.51 192.331   3
   3   5   1 5417.44 303.140   5
  -3  -5  -1 5651.37 290.570   5
   3   5   1 5132.58 237.064   1
   3  -5   1 5505.19 278.333   4
  -3   5  -1 5554.75 307.085   1
  -3   5  -1 5416.15 270.208   4
   3   5   2 17597.6 577.750   5
  -3   5  -2 19221.6 600.732   1
  -3  -5  -2 18333.0 551.047   5
   3  -5   2 17864.9 525.782   4
  -3  -5  -2 18414.9 439.875   3
  -3   5  -2 18835.7 523.827   4
   3   5   2 17540.5 520.870   1
   3  -5   2 19669.6 638.886   1
   3  -5   3 2029.80 243.661   1
  -3  -5  -3 1895.19 182.319   5
   3   5   3 1728.91 188.179   1
  -3   5  -3 1873.96 165.990   4
   3  -5   3 1818.77 171.009   4
   3   5   3 1835.98 218.898   5
  -3  -5  -3 1659.85 144.520   3
   3  -5   4 566.637 106.243   4
   3   5   4 560.060 152.497   5
   3  -5   4 647.080 175.097   1
  -3  -5  -4 734.698 147.340   5
   3   5   4 244.831 126.964   1
   3   5   4 578.983 104.714   3
  -3  -5  -5 13290.6 488.973   5
   3   5   5 12996.0 537.980   5
   3  -5   5 12702.5 431.063   4
   3   5   5 13427.6 468.458   3
   3   5   5 12761.3 559.290   1
   3  -5   5 13795.0 622.367   1
   3   5   6 1643.03 211.777   5
   3  -5   6 1514.86 161.851   4
   3  -5   6 1888.17 288.338   1
   3   5   6 1961.70 264.325   1
   3  -5   7 3933.60 387.214   1
   3   5   7 4061.67 324.871   5
   3  -5   7 3830.26 229.493   4
   3   5   7 4216.35 388.953   1
   3   5   8 1397.73 268.202   1
   3  -5   8 1763.63 296.816   1
   3  -5   8 1253.56 143.449   4
   3   5   8 1705.56 233.942   5
   3  -5   9 8780.94 611.046   1
   3  -5   9 7523.98 324.955   4
   3   5   9 8115.49 580.209   1
   3   5  10 2252.67 345.471   1
   3  -5  10 2332.64 179.057   4
   3  -5  10 2232.42 349.067   1
   3   5  11 3296.31 422.406   1
   3  -5  11 3410.89 439.287   1
   3  -5  12 363.452 250.023   1
   3   5  12 781.379 299.159   1
   3   5  13 540.660 249.239   1
   3  -5  13 987.418 324.231   1
   3   5  14-119.125 265.055   1
   3  -5  14 13.8539 248.205   1
   3  -5  15 244.807 277.748   1
   3   5  15-210.009 261.244   1
   3   5  16 607.201 282.965   1
   3  -5  16 1110.09 356.955   1
  -3  -6  19-72.1978 234.357   1
  -3   6  18 2656.91 457.322   1
  -3  -6  18 2254.05 412.887   1
  -3   6  17 246.675 244.953   1
  -3  -6  17 18.2074 208.428   1
  -3   6  16 4434.58 532.450   1
  -3  -6  16 4157.28 475.658   1
  -3   6  15 2732.13 417.922   1
  -3  -6  15 3076.12 414.194   1
  -3  -6  14 5173.83 487.862   1
  -3   6  14 5637.24 541.862   1
  -3   6  13-31.8317 188.978   1
  -3  -6  13-228.224 204.285   1
  -3  -6  12 9319.39 587.476   1
  -3   6  12 10094.8 657.362   1
  -3  -6  11 945.120 216.122   1
   3  -6 -11 895.400 231.247   3
  -3   6  11 1119.03 258.820   1
  -3   6  10 21706.5 905.560   1
  -3  -6  10 22446.8 809.585   1
   3  -6 -10 23802.9 897.429   3
   3  -6  -9 229.800 178.420   3
  -3  -6   9 592.134 184.226   1
  -3   6   8 45269.8 727.871   5
  -3  -6   8 49899.1 1137.36   1
   3  -6  -8 49453.7 1256.23   3
  -3   6   7 6842.97 218.276   5
   3   6  -7 6617.74 188.699   4
   3  -6  -7 7456.94 445.125   3
   3   6  -7 7421.50 334.253   1
  -3  -6   7 7532.24 369.028   1
  -3   6   6 20850.0 455.990   5
  -3  -6   6 20912.1 574.585   1
   3  -6  -6 22281.4 722.715   3
   3   6  -6 20874.5 550.775   1
   3   6  -5 1700.14 139.386   1
  -3  -6   5 1707.12 147.324   1
  -3  -6   5 1548.87 220.449   2
   3  -6  -5 1746.06 213.367   6
  -3  -6   4 64752.9 1284.36   2
   3   6  -4 66956.2 1284.45   5
   3   6  -4 66376.8 1037.43   1
   3  -6  -4 64726.5 1320.54   6
   3   6  -3 1328.35 176.039   5
   3   6  -3 1063.70 88.1200   1
  -3  -6   3 1095.63 161.713   2
   3  -6  -3 1053.95 159.565   6
   3   6  -3 1329.81 154.309   2
  -3  -6   2 48.9242 116.337   2
   3   6  -2 6.76391 113.792   5
   3   6  -2 23.0432 34.4710   1
  -3   6   2 49.9455 88.4320   4
   3   6  -2 114.572 92.8065   2
   3   6  -1-57.2893 113.783   5
   3   6  -1 0.67796 86.9868   2
  -3   6   1 95.1771 100.999   4
  -3  -6   1 87.3193 91.8672   5
   3   6   0 43.0227 121.389   5
   3   6   0 110.831 97.4725   2
  -3   6   0 222.345 103.432   4
  -3   6   0 209.534 109.948   1
  -3  -6   0 106.095 98.0373   5
   3   6   0 36.4726 36.0819   6
  -3   6  -1 210.866 95.4285   4
  -3  -6  -1 176.276 109.795   5
  -3   6  -1 395.551 135.993   1
   3  -6   1 128.612 118.933   4
   3  -6   1 271.595 136.375   1
   3   6   1 69.2502 118.221   5
   3   6   1 212.866 86.7772   1
  -3   6  -2 25876.6 639.638   4
   3   6   2 24784.6 641.909   1
  -3  -6  -2 24817.4 560.175   3
  -3   6  -2 25551.8 728.083   1
   3   6   2 24724.5 721.943   5
   3  -6   2 24404.0 651.482   4
  -3  -6  -2 25553.4 692.500   5
   3  -6   2 25359.6 771.059   1
  -3  -6  -3 196.751 110.721   5
   3   6   3 173.692 129.988   5
  -3   6  -3 440.691 112.971   4
  -3  -6  -3 254.295 89.5725   3
   3   6   3 233.377 124.214   1
   3  -6   3 376.894 176.924   1
   3  -6   3 306.874 107.407   4
  -3  -6  -4 45808.3 1017.06   5
   3   6   4 44682.8 1088.89   5
  -3  -6  -4 45080.6 961.287   3
   3  -6   4 46196.4 1196.34   1
   3  -6   4 45384.5 950.670   4
  -3   6  -4 46219.2 938.405   4
   3   6   4 45054.6 1084.10   1
   3  -6   5 5841.53 289.927   4
   3   6   5 5225.27 348.222   5
   3   6   5 5945.07 393.714   1
   3   6   5 5495.84 297.472   3
   3  -6   5 5462.04 421.428   1
  -3  -6  -5 5893.41 324.150   3
   3  -6   6 29338.3 1004.32   1
   3  -6   6 28653.0 696.326   4
   3   6   6 29810.2 883.030   5
   3   6   6 28897.1 929.717   1
   3   6   7 735.879 199.910   1
   3  -6   7 980.981 249.816   1
   3  -6   7 738.567 133.971   4
   3   6   7 866.354 187.228   5
   3   6   8 20002.0 748.793   5
   3  -6   8 19485.8 543.243   4
   3  -6   8 22236.6 924.305   1
   3   6   8 21056.7 869.575   1
   3  -6   9-110.663 199.961   1
   3  -6   9-87.3596 78.4720   4
   3   6   9 8.72272 134.149   5
   3   6   9-270.155 217.118   1
   3   6  10 6971.28 557.564   1
   3  -6  10 6879.97 577.302   1
   3  -6  10 6117.09 269.415   4
   3  -6  11 1027.78 283.475   1
   3   6  11 1011.54 276.453   1
   3  -6  12 5095.62 546.813   1
   3   6  12 4749.33 511.725   1
   3  -6  13 1511.51 382.032   1
   3   6  13 1580.48 346.566   1
   3   6  14 3931.19 520.384   1
   3  -6  14 3208.81 475.369   1
   3  -6  15 486.080 316.076   1
   3   6  15 912.220 328.020   1
   3  -6  16 4697.19 614.497   1
  -3  -7  19 21.2206 251.227   1
  -3  -7  18-33.7100 216.959   1
  -3   7  18 85.1519 272.892   1
  -3  -7  17 205.713 233.736   1
  -3   7  17 310.393 272.393   1
  -3   7  16-82.8366 285.208   1
  -3  -7  16 22.4871 204.655   1
  -3  -7  15 1361.67 301.496   1
  -3   7  15 790.288 298.009   1
  -3   7  14 272.301 254.739   1
  -3  -7  14 845.468 256.768   1
  -3   7  13 1780.05 335.959   1
  -3  -7  13 1602.77 272.767   1
  -3   7  12 5560.49 500.582   1
  -3  -7  12 6057.32 471.281   1
   3  -7 -12 6264.23 510.963   3
  -3   7  11 87.5436 178.490   1
  -3  -7  11 63.0819 153.415   1
   3  -7 -11-35.9959 175.451   3
  -3   7  10 408.295 195.374   1
   3  -7 -10 697.266 196.468   3
  -3  -7  10 1021.20 196.110   1
  -3  -7   9 95.8841 144.356   1
  -3   7   9 218.189 47.9803   5
   3  -7  -9 487.788 196.959   3
  -3  -7   8 3394.38 267.748   1
   3  -7  -8 3048.35 310.310   3
  -3   7   8 3163.27 154.461   5
  -3  -7   7 4916.65 296.544   1
   3   7  -7 4671.37 266.125   1
   3  -7  -7 4406.64 357.797   3
  -3   7   7 4581.62 203.514   5
  -3   7   6 3822.59 199.286   5
   3   7  -6 4104.30 232.318   1
   3  -7  -6 4112.50 318.568   3
  -3  -7   6 4132.24 253.752   1
  -3  -7   6 4100.61 322.027   2
  -3  -7   5 291.868 154.937   2
  -3  -7   5 232.110 90.1101   1
   3   7  -5 135.537 74.8844   1
   3  -7  -5 193.922 136.347   6
   3   7  -4 5563.73 334.142   5
   3   7  -4 5646.55 223.470   1
  -3  -7   4 5871.49 344.586   2
  -3  -7   4 5919.90 233.216   1
   3  -7  -4 6111.37 354.206   6
   3   7  -3 17197.4 531.896   2
   3  -7  -3 17028.2 565.571   6
   3   7  -3 16297.4 582.539   5
   3   7  -3 16952.8 371.527   1
  -3  -7   3 17456.8 566.607   2
   3   7  -2 516.236 67.0459   1
   3   7  -2 487.925 148.645   5
   3   7  -2 595.596 120.088   2
  -3  -7   2 519.049 150.709   2
  -3   7   2 526.642 129.670   4
  -3  -7   1 3701.92 254.756   5
   3   7  -1 3533.38 271.186   5
   3   7  -1 3757.10 240.224   2
  -3   7   1 3923.39 259.125   4
   3   7   0 114.558 96.0647   2
   3   7   0 28.5411 124.861   5
  -3   7   0 175.386 115.015   1
   3   7   0 215.733 44.4376   6
  -3   7   0 229.307 102.711   4
  -3  -7   0 346.793 116.742   5
  -3   7  -1 651.112 154.210   1
  -3   7  -1 641.894 124.347   4
  -3  -7  -1 589.440 129.692   5
   3   7   1 577.349 142.019   5
   3   7   1 634.884 111.151   1
  -3  -7  -2 11037.5 449.011   5
   3  -7   2 10775.3 508.091   1
   3   7   2 10361.5 474.293   5
   3   7   2 10290.4 399.194   1
  -3   7  -2 10567.2 406.264   4
  -3  -7  -2 9867.37 351.138   3
   3  -7   3-76.5744 151.707   1
   3   7   3-24.2264 109.442   1
  -3  -7  -3 47.0386 86.4291   3
   3   7   3-85.1249 139.383   5
  -3   7  -3 116.821 97.8825   4
   3   7   4 696.924 167.364   1
   3  -7   4 575.996 122.339   4
   3  -7   4 799.508 208.623   1
  -3  -7  -4 915.899 147.534   3
   3   7   4 571.482 169.636   5
  -3   7  -4 776.343 125.814   4
  -3  -7  -5-7.70316 92.4676   3
   3   7   5-132.999 144.851   1
   3   7   5 4.63975 123.397   5
   3  -7   5 150.199 181.881   1
  -3   7  -5 12.5145 74.6678   4
   3  -7   5 67.7431 94.5419   4
   3   7   6 32637.8 1025.31   1
   3   7   6 33400.1 968.373   5
   3  -7   6 34250.8 784.409   4
   3  -7   6 35050.3 1106.82   1
   3   7   7 3939.41 374.226   1
   3   7   7 3679.89 326.626   5
   3  -7   7 3532.47 224.388   4
   3  -7   7 3409.62 388.247   1
   3   7   8 5221.03 438.717   1
   3  -7   8 5413.56 264.216   4
   3   7   8 5275.08 382.389   5
   3  -7   8 5570.26 481.943   1
   3  -7   9 55.5380 66.4470   4
   3  -7   9-237.467 200.291   1
   3   7   9-342.845 197.562   1
   3   7   9-38.6421 125.618   5
   3   7  10 13067.6 752.866   1
   3  -7  10 12121.4 753.849   1
   3   7  10 11778.1 588.723   5
   3  -7  11 3643.17 456.103   1
   3   7  11 2557.38 385.669   1
   3   7  12 769.883 278.039   1
   3  -7  12 498.559 231.799   1
   3  -7  13 226.666 247.074   1
   3   7  13-137.161 239.543   1
   3  -7  14 2259.08 432.333   1
   3   7  14 1796.65 400.655   1
   3   7  15 540.569 291.247   1
   3  -7  15-291.517 277.317   1
  -3  -8  19 796.802 313.091   1
  -3  -8  18 1614.69 358.415   1
  -3   8  18 1884.33 412.030   1
  -3  -8  17 6056.32 584.127   1
  -3   8  17 5743.03 631.892   1
  -3   8  16 1492.80 355.351   1
  -3  -8  16 1297.80 289.105   1
  -3  -8  15 3765.25 435.657   1
  -3   8  15 3848.29 483.879   1
  -3   8  14 2842.41 410.150   1
  -3  -8  14 2477.76 358.104   1
  -3  -8  13 5104.58 453.271   1
  -3   8  13 5313.18 527.825   1
   3  -8 -13 4217.93 449.753   3
  -3   8  12 6637.05 570.796   1
   3  -8 -12 7348.70 563.864   3
  -3  -8  12 7437.54 511.136   1
  -3   8  11 5201.67 478.763   1
  -3  -8  11 5142.18 409.084   1
   3  -8 -11 5003.37 453.969   3
  -3   8  10 3603.23 164.136   5
   3  -8 -10 4056.33 389.787   3
  -3  -8  10 4652.85 366.727   1
  -3   8   9 16214.8 408.320   5
   3  -8  -9 16149.0 733.079   3
  -3  -8   9 16572.9 650.477   1
  -3   8   8 21662.2 495.835   5
  -3  -8   8 20283.7 668.875   1
   3  -8  -8 22429.0 817.831   3
   3   8  -7 4415.56 257.640   1
  -3   8   7 4758.96 230.376   5
   3  -8  -7 4083.21 342.315   3
  -3  -8   7 4391.00 349.546   2
  -3  -8   7 4576.30 292.766   1
  -3  -8   6 762.714 135.847   1
   3  -8  -6 167.959 142.688   3
  -3  -8   6 498.848 173.884   2
  -3   8   6 514.249 106.457   5
   3   8  -6 631.345 104.788   1
  -3  -8   5 22843.1 725.540   2
   3  -8  -5 23217.3 758.004   6
   3   8  -5 23321.6 570.174   1
  -3  -8   5 23972.1 600.178   1
  -3  -8   4 4463.53 306.695   2
   3   8  -4 4509.25 325.493   5
   3   8  -4 4664.25 211.839   1
   3  -8  -4 3695.53 292.929   6
   3   8  -3 2949.29 269.602   5
  -3  -8   3 2554.02 235.849   2
   3   8  -3 2788.40 156.793   1
   3   8  -3 3004.46 227.092   2
   3  -8  -3 2851.38 252.365   6
   3   8  -2 14847.2 369.086   1
   3   8  -2 15554.9 580.158   5
   3   8  -2 15117.1 513.966   2
  -3  -8   2 15352.9 539.977   2
  -3   8   1 2288.07 215.034   4
   3   8  -1 2482.04 211.040   2
   3   8  -1 2517.51 260.586   5
   3   8   0 1791.53 226.012   5
  -3   8   0 1887.85 191.243   4
   3   8   0 1693.65 190.909   2
  -3   8   0 1744.82 203.670   1
   3   8   1 5141.40 344.699   5
   3   8   1 5485.79 207.750   6
  -3   8  -1 5384.65 294.356   4
  -3   8  -2 17401.5 549.157   4
   3  -8   2 17911.3 665.523   1
   3   8   2 17275.1 538.891   1
   3   8   2 17210.5 630.411   5
  -3   8  -3 37962.6 847.037   4
   3   8   3 35630.2 968.996   5
  -3  -8  -3 35274.1 816.611   3
   3   8   3 35261.7 895.215   1
   3  -8   3 35841.5 1027.40   1
  -3  -8  -4 3187.21 236.987   3
  -3   8  -4 3338.41 222.785   4
   3   8   4 2922.80 281.416   5
   3  -8   4 3410.18 337.111   1
   3   8   4 3279.89 274.102   1
   3   8   5 14744.9 619.232   1
   3   8   5 15032.2 616.259   5
  -3   8  -5 15087.7 478.476   4
  -3  -8  -5 14118.7 536.585   3
   3  -8   5 14397.6 694.376   1
   3   8   6 6372.28 411.093   5
   3   8   6 6634.07 440.847   1
   3  -8   6 6384.36 467.331   1
  -3  -8  -6 6440.75 379.601   3
   3  -8   7 18975.3 841.140   1
   3   8   7 18859.4 793.105   1
   3   8   7 17504.0 703.654   5
   3  -8   8 6641.51 518.170   1
   3   8   8 6360.86 484.078   1
   3   8   8 6091.66 422.368   5
   3  -8   9 460.151 231.675   1
   3   8   9 797.687 245.349   1
   3   8   9 990.313 235.330   5
   3  -8  10 14032.4 809.670   1
   3   8  10 12643.9 766.317   1
   3   8  10 11712.0 594.019   5
   3  -8  11 5933.19 573.630   1
   3   8  11 6024.33 574.697   1
   3  -8  12 4060.09 501.596   1
   3   8  12 4209.51 503.613   1
   3  -8  13 11031.5 804.763   1
   3   8  13 10416.5 788.627   1
   3  -8  14 4157.83 544.083   1
   3   8  14 3517.84 508.108   1
   3   8  15 1365.41 396.535   1
   3  -8  15 1082.35 368.586   1
  -3  -9  19 1958.74 380.121   1
  -3  -9  18-346.228 254.152   1
  -3  -9  17-169.476 239.445   1
  -3   9  17-186.307 263.914   1
  -3   9  16 106.864 232.021   1
  -3  -9  16 472.096 241.631   1
  -3  -9  15 104.893 190.416   1
  -3   9  15 272.789 234.094   1
  -3  -9  14 158.594 175.110   1
  -3   9  14 532.504 256.541   1
  -3   9  13 3035.36 437.948   1
  -3  -9  13 2697.40 352.354   1
   3  -9 -13 2598.51 365.990   3
   3  -9 -12-33.5751 182.234   3
  -3  -9  12-202.922 176.179   1
  -3   9  12 235.132 229.148   1
  -3   9  11 1835.76 327.531   1
   3  -9 -11 1199.75 274.066   3
  -3  -9  11 929.631 211.532   1
  -3   9  11 896.950 89.1091   5
  -3  -9  10 239.897 171.320   1
   3  -9 -10 153.614 196.767   3
  -3   9  10 295.337 76.2075   5
  -3  -9   9 3504.90 299.459   1
   3  -9  -9 4003.11 378.211   3
  -3   9   9 3405.22 197.819   5
   3  -9  -8 219.401 166.664   3
  -3   9   8 120.730 75.7495   5
  -3  -9   8 168.726 129.859   1
   3   9  -7 936.176 137.430   1
   3  -9  -7 864.626 186.144   3
  -3   9   7 867.592 127.379   5
  -3  -9   7 880.741 195.320   2
  -3  -9   7 974.424 159.811   1
   3   9  -6 397.296 97.4642   1
  -3   9   6 477.933 112.119   5
  -3  -9   6 248.454 100.546   1
  -3  -9   6 421.696 155.908   2
   3   9  -5 3080.18 199.988   1
  -3  -9   5 3108.80 281.830   2
   3  -9  -5 2819.00 277.517   6
  -3  -9   5 2891.26 211.375   1
  -3  -9   4 32580.7 880.270   2
   3   9  -4 32068.7 672.323   1
   3   9  -4 32107.9 913.424   5
   3  -9  -4 32526.2 900.013   6
   3   9  -3 11255.4 512.916   5
  -3  -9   3 11950.3 490.172   2
  -3   9   3 9953.16 231.974   2
   3   9  -3 11685.0 335.025   1
   3  -9  -3 11679.2 502.264   6
   3   9  -2 5110.03 355.291   5
  -3  -9   2 4715.04 320.169   2
   3   9  -2 4883.21 293.360   2
   3   9  -2 4990.70 215.249   1
   3   9  -1 21067.0 620.130   2
   3   9  -1 20769.6 729.312   5
  -3   9   0 4049.62 274.392   4
   3   9   0 3573.10 310.220   5
   3  -9   0 3488.35 146.414   2
   3   9   0 3921.35 266.382   2
  -3   9  -1 924.149 148.478   4
   3   9   1 1010.08 101.440   6
   3   9   1 1111.82 194.234   5
   3   9   2 591.928 165.688   5
  -3   9  -2 469.084 118.538   4
   3   9   2 479.688 94.9798   6
  -3  -9  -3 3786.33 251.537   3
   3   9   3 3729.43 317.543   5
  -3   9  -3 3800.26 256.056   4
   3  -9   3 3913.49 337.223   1
   3   9   3 3821.84 288.038   1
   3  -9   4 215.201 148.940   1
  -3   9  -4 65.2158 79.2820   4
   3   9   4 160.727 129.636   1
  -3  -9  -4 65.8029 93.7420   3
   3   9   4 30.7295 124.163   5
   3   9   5 28411.4 890.881   5
  -3   9  -5 29563.7 715.975   4
   3   9   5 26073.3 865.741   1
   3  -9   5 29102.2 1003.56   1
  -3  -9  -5 28666.4 802.867   3
   3   9   6 2685.51 308.407   1
   3  -9   6 3069.59 337.511   1
   3   9   6 3701.34 317.322   5
  -3   9  -6 3506.69 221.350   4
  -3  -9  -6 3188.85 279.954   3
   3  -9   7 18779.9 857.296   1
   3   9   7 18129.3 798.216   1
   3   9   7 18140.2 723.184   5
  -3  -9  -7 18637.1 700.808   3
   3  -9   8 7685.19 564.933   1
   3   9   8 7445.51 467.597   5
   3   9   8 7667.52 536.908   1
   3  -9   9 7469.83 577.860   1
   3   9   9 6695.02 457.175   5
   3   9   9 6158.58 536.814   1
   3   9  10 328.920 144.024   5
   3  -9  10-182.098 224.592   1
   3   9  10-100.909 199.448   1
   3  -9  11-121.690 216.599   1
   3   9  11 76.6219 147.782   5
   3   9  11 493.908 264.770   1
   3   9  12 357.409 229.608   1
   3  -9  12-42.3815 230.389   1
   3   9  13 377.917 253.887   1
   3  -9  13 414.625 259.213   1
   3  -9  14 215.317 281.905   1
   3   9  14 568.428 293.244   1
   3   9  15 1490.37 373.764   1
   3  -9  15 1144.60 362.396   1
  -3 -10  19 868.000 346.427   1
  -3 -10  18 608.133 270.591   1
  -3 -10  17 2895.16 421.406   1
  -3  10  17 2689.72 461.525   1
  -3 -10  16-303.826 256.977   1
  -3  10  16 512.673 286.850   1
  -3  10  15 4404.81 527.272   1
  -3 -10  15 4553.92 476.081   1
  -3  10  14-167.736 252.229   1
   3 -10 -14-24.0354 188.106   3
  -3 -10  14-255.944 207.738   1
  -3  10  13 6678.42 595.210   1
  -3 -10  13 6428.79 509.117   1
   3 -10 -13 7103.13 575.404   3
  -3 -10  12 4396.64 406.703   1
  -3  10  12 4238.05 474.862   1
   3 -10 -12 4692.47 470.814   3
   3 -10 -11 19420.0 879.484   3
  -3  10  11 20499.5 939.824   1
  -3 -10  11 19237.7 796.120   1
  -3  10  11 16424.0 447.686   5
  -3  10  10 751.303 113.376   5
  -3 -10  10 635.096 180.599   1
   3 -10 -10 773.217 230.147   3
  -3  10   9 8298.90 337.425   5
  -3 -10   9 9224.40 489.550   1
   3 -10  -9 8789.32 559.416   3
   3 -10  -8 105.876 154.724   3
  -3 -10   8-59.9175 106.704   1
  -3 -10   8-55.2092 166.017   2
  -3  10   8 157.706 83.2491   5
   3 -10  -7 18097.3 738.046   3
  -3  10   7 18139.4 554.645   5
  -3 -10   7 18163.7 711.703   2
  -3 -10   7 18551.2 637.860   1
   3  10  -7 18543.3 567.903   1
  -3 -10   6 6006.22 406.599   2
  -3  10   6 5752.73 310.372   5
  -3 -10   6 5605.96 315.318   1
   3  10  -6 5394.03 285.699   1
  -3 -10   5 27949.0 834.511   2
   3  10  -5 27636.7 657.108   1
   3 -10  -5 27445.8 859.138   6
  -3 -10   4 12760.8 546.928   2
   3  10  -4 13933.2 409.040   1
   3 -10  -4 12759.2 551.331   6
   3  10  -4 13773.8 600.427   5
   3 -10  -3 15724.8 587.272   6
   3  10  -3 15708.9 645.288   5
  -3  10   3 14265.4 301.871   2
   3  10  -3 16347.8 435.546   1
  -3 -10   3 15748.1 582.058   2
  -3 -10   2 14317.7 551.218   2
   3  10  -2 14312.4 408.264   1
   3  10  -2 14541.1 606.563   5
   3  10  -1 8784.23 480.196   5
   3 -10   0 150.522 69.8678   2
   3  10   0 120.110 143.602   5
   3  10   1 25093.9 819.343   5
   3  10   2 3052.52 184.236   6
   3  10   2 3397.37 316.137   5
  -3  10  -3 901.034 144.184   4
   3  10   3 1025.45 128.656   6
  -3 -10  -3 954.925 145.228   3
   3  10   3 864.602 185.034   5
   3 -10   3 1183.33 218.892   1
   3  10   3 854.603 157.370   1
  -3 -10  -4 4.66366 105.799   3
   3 -10   4 104.502 154.706   1
   3  10   4-9.21854 110.456   1
   3  10   4 124.362 86.5036   6
  -3  10  -4-10.9429 81.7604   4
   3  10   4 74.7453 153.640   5
  -3 -10  -5 20871.1 688.088   3
   3  10   5 19790.3 752.009   1
  -3  10  -5 21341.5 613.096   4
   3  10   5 20995.0 773.036   5
   3 -10   5 21319.8 862.636   1
   3  10   6 155.108 136.401   1
   3  10   6 153.371 130.913   5
  -3 -10  -6 163.134 120.309   3
  -3  10  -6 227.814 86.9422   4
   3 -10   6 250.727 177.493   1
   3  10   7 14831.0 673.096   5
   3 -10   7 17486.4 829.226   1
   3  10   7 15398.7 738.648   1
  -3 -10  -7 16135.5 654.726   3
   3  10   8 727.522 192.263   5
   3  10   8 676.338 219.296   1
  -3 -10  -8 1188.43 208.279   3
   3 -10   8 1171.61 260.236   1
   3 -10   9 24276.2 1078.94   1
   3  10   9 24421.1 890.049   5
   3  10   9 24428.8 1011.46   1
   3 -10  10 1672.10 321.621   1
   3  10  10 1816.03 263.080   5
   3  10  10 1438.85 284.767   1
   3  10  11 11716.8 611.523   5
   3  10  11 9845.91 720.305   1
   3 -10  11 11046.8 766.639   1
   3 -10  12 411.207 248.786   1
   3  10  12-324.956 247.359   1
   3 -10  13 5151.09 573.465   1
   3  10  13 5195.75 564.258   1
   3 -10  14 449.807 280.689   1
   3  10  14-1.02077 253.018   1
   3 -10  15 2719.88 461.229   1
   3  10  15 1569.76 392.324   1
  -3 -11  18-482.353 320.192   1
  -3  11  17 17.0289 273.247   1
  -3 -11  17-46.6489 218.416   1
  -3 -11  16 944.206 274.245   1
  -3  11  16 1425.84 387.598   1
  -3 -11  15 1292.76 284.131   1
  -3  11  15 1280.99 368.450   1
  -3 -11  14 312.764 201.042   1
  -3  11  14 281.159 243.410   1
   3 -11 -14 426.124 253.807   3
  -3  11  13 483.650 253.005   1
  -3 -11  13-161.979 189.481   1
   3 -11 -13 320.469 222.215   3
  -3 -11  12 4974.00 432.828   1
  -3  11  12 4260.55 485.405   1
   3 -11 -12 4107.38 444.179   3
  -3  11  11 803.363 111.928   5
  -3  11  11 855.870 271.245   1
   3 -11 -11 1024.74 262.489   3
  -3 -11  11 896.329 213.517   1
  -3 -11  10-5.76786 145.177   1
  -3 -11  10 45.5193 169.666   2
   3 -11 -10-192.547 177.898   3
  -3  11  10-41.7490 82.5732   5
   3 -11  -9 3546.88 390.623   3
  -3  11   9 4164.44 259.678   5
   3  11  -9 3173.29 140.810   4
  -3 -11   9 3657.68 331.522   1
  -3 -11   9 3832.77 384.468   2
   3 -11  -8 72.0432 151.541   3
  -3  11   8 84.9360 85.5376   5
  -3 -11   8 256.472 145.002   1
  -3 -11   8 60.5210 144.985   2
  -3  11   7 362.495 112.200   5
  -3 -11   7 119.141 99.8332   1
  -3 -11   7 380.420 167.695   2
   3 -11  -7 202.931 166.494   3
   3  11  -7 158.313 88.7544   1
  -3  11   6 4511.50 297.148   5
  -3 -11   6 4580.79 359.376   2
   3  11  -6 4447.21 263.857   1
  -3 -11   6 4471.37 293.466   1
  -3 -11   5 1727.90 239.234   2
   3  11  -5 1691.83 160.668   1
   3 -11  -5 1675.67 248.067   6
  -3 -11   4 2284.47 242.332   2
   3  11  -4 2516.95 291.835   5
   3 -11  -4 1871.25 229.792   6
   3  11  -4 2542.72 180.198   1
  -3 -11   3 29135.7 837.696   2
  -3  11   3 25439.0 474.870   2
   3 -11  -3 27119.0 827.616   6
   3  11  -3 29147.0 651.052   1
   3  11  -3 29080.4 911.082   5
  -3 -11   2 771.699 185.796   2
   3  11  -2 842.364 204.018   5
   3  11  -2 737.752 120.592   1
   3  11  -1 5554.92 396.703   5
  -3 -11   1 4831.68 177.773   6
   3  11   0-50.8383 155.207   5
   3 -11   0 67.4132 56.3808   2
   3  11   1 3888.30 333.927   5
   3 -11   1 3931.63 196.205   2
   3  11   2 11567.1 575.813   5
   3  11   2 12249.4 387.785   6
   3  11   3 11107.9 552.358   5
   3  11   3 10809.5 391.114   6
   3  11   4 7871.45 471.780   5
   3  11   4 7788.78 440.852   1
  -3 -11  -4 7952.82 407.281   3
   3 -11   4 8116.96 511.940   1
   3  11   4 7475.09 344.821   6
  -3  11  -5 8488.22 378.156   4
   3  11   5 7997.10 486.029   5
  -3 -11  -5 7698.13 421.091   3
   3 -11   5 7832.27 525.085   1
   3  11   5 8367.71 486.596   1
   3 -11   6 3070.17 356.022   1
   3  11   6 2557.33 306.887   5
   3  11   6 3093.42 322.767   1
  -3 -11  -6 2812.09 269.083   3
  -3  11  -6 2841.49 215.268   4
  -3 -11  -7 184.711 118.417   3
   3  11   7 18.1714 160.348   5
   3 -11   7 456.123 226.348   1
   3  11   7 270.777 182.480   1
  -3  11  -7 312.662 100.309   4
   3  11   8 870.179 215.961   5
   3  11   8 790.144 229.956   1
  -3 -11  -8 940.513 196.317   3
   3 -11   8 468.747 234.171   1
   3  11   9 1994.27 332.424   1
   3  11   9 2805.54 316.298   5
   3 -11   9 2431.13 381.580   1
   3 -11  10 981.040 276.697   1
   3  11  10 1129.70 221.029   5
   3  11  10 737.534 236.194   1
   3  11  11 1099.00 289.999   1
   3  11  11 1011.74 216.594   5
   3 -11  11 945.552 291.309   1
   3 -11  12 1100.07 294.101   1
   3  11  12 372.112 239.084   1
   3  11  13 2798.21 454.552   1
   3 -11  13 1593.12 370.277   1
   3 -11  14 234.986 259.400   1
   3  11  14 301.081 245.710   1
   3 -11  15 254.578 300.865   1
   3  11  15-170.743 253.846   1
  -3 -12  18 742.745 273.183   1
  -3  12  17 1307.51 391.954   1
  -3 -12  17 694.392 269.730   1
  -3 -12  16 6136.02 563.394   1
  -3  12  16 5031.40 596.402   1
  -3  12  15 1461.11 361.071   1
  -3 -12  15 1169.03 297.965   1
   3 -12 -15 853.050 304.996   3
   3 -12 -14 246.639 204.002   3
  -3  12  14 725.674 255.431   1
  -3 -12  14 926.081 267.043   1
  -3  12  13 178.310 226.678   1
   3 -12 -13 286.926 215.341   3
  -3 -12  13 0.10801 160.816   1
  -3  12  12 7183.97 618.341   1
  -3 -12  12 7245.17 517.017   1
   3 -12 -12 6063.86 532.271   3
  -3 -12  11 1247.58 250.247   1
   3 -12 -11 1196.58 288.240   3
  -3 -12  11 821.432 237.558   2
   3 -12 -10 14487.3 767.137   3
  -3  12  10 14516.9 499.716   5
  -3 -12  10 16226.2 701.283   1
  -3 -12  10 15120.8 747.885   2
  -3 -12   9 2547.87 332.016   2
   3 -12  -9 3246.55 364.700   3
  -3  12   9 2949.66 237.988   5
  -3 -12   9 2827.30 299.702   1
  -3  12   8 9927.88 440.819   5
  -3 -12   8 9180.96 477.636   1
   3 -12  -8 8224.39 539.902   3
  -3 -12   8 8799.17 551.306   2
  -3  12   7 4345.62 303.161   5
   3 -12  -7 4174.35 382.663   3
  -3 -12   7 4696.03 374.314   2
  -3 -12   7 4122.04 306.099   1
  -3 -12   6 25273.6 862.366   2
  -3  12   6 24957.3 764.568   5
   3  12  -6 24425.3 661.883   1
   3 -12  -6 24598.8 859.927   6
  -3 -12   5 127.642 135.290   2
   3 -12  -5 691.202 187.572   6
   3  12  -5 258.491 90.7454   1
  -3 -12   4 22522.2 758.747   2
  -3  12   4 22179.6 477.586   2
   3 -12  -4 23044.8 785.042   6
   3  12  -4 23075.3 600.436   1
   3  12  -4 22743.1 847.480   5
  -3 -12   3 4241.07 323.403   2
   3  12  -3 4036.78 234.287   1
   3 -12  -3 4386.71 329.823   6
   3  12  -3 3974.37 346.945   5
  -3  12   3 3617.07 148.920   2
   3  12  -2 38139.2 1141.99   5
  -3 -12   2 39979.1 1031.15   2
   3  12  -2 40075.2 838.512   1
   3  12  -1 15087.7 661.986   5
  -3 -12   1 13645.6 345.884   6
   3  12   0 48442.0 1284.57   5
   3 -12   0 48440.9 834.562   2
   3  12   1 6337.05 441.029   5
   3 -12   1 6859.53 268.458   2
   3  12   2 7376.81 472.988   5
   3 -12   2 7432.64 315.463   2
   3  12   3 540.163 167.617   5
   3  12   3 394.311 73.9528   6
   3  12   4 3383.97 335.692   5
   3 -12   4 3258.82 345.229   1
  -3 -12  -4 2876.36 254.945   3
   3  12   4 2681.11 274.110   1
   3  12   5 137.885 138.712   1
   3 -12   5 115.110 155.804   1
   3  12   5 38.3078 143.851   5
  -3 -12  -5-110.050 123.282   3
   3  12   6 4151.09 374.844   1
   3  12   6 3471.99 337.110   5
   3 -12   6 4192.83 424.517   1
  -3 -12  -6 3746.39 311.408   3
  -3 -12  -7 1052.69 194.862   3
   3 -12   7 833.525 232.239   1
   3  12   7 673.636 180.895   5
   3  12   7 373.797 193.477   1
   3  12   8 12427.5 642.155   5
   3  12   8 11566.7 686.626   1
   3 -12   8 13271.9 774.404   1
  -3 -12  -8 12931.6 627.563   3
   3  12   9 4031.50 378.971   5
   3  12   9 4397.59 453.708   1
  -3 -12  -9 4346.48 379.698   3
   3 -12   9 4510.04 506.475   1
   3  12  10 13961.1 812.366   1
   3  12  10 13367.8 679.826   5
   3 -12  10 13206.2 845.606   1
   3  12  11 2433.53 391.153   1
   3  12  11 2656.06 335.768   5
   3 -12  11 2480.23 409.366   1
   3 -12  12 4948.84 565.787   1
   3  12  12 5010.30 556.783   1
   3  12  13-219.820 243.769   1
   3 -12  13-133.554 260.735   1
   3 -12  14 4149.54 545.415   1
   3  12  14 2978.53 462.932   1
  -3 -13  18-545.077 299.518   1
  -3 -13  17 413.133 247.951   1
  -3 -13  16 227.028 216.588   1
  -3  13  16 657.679 328.924   1
   3 -13 -15-347.091 237.927   3
  -3  13  15 38.6583 232.001   1
  -3 -13  15-219.288 206.303   1
   3 -13 -14 1387.75 320.834   3
  -3 -13  14 1528.67 310.953   1
  -3  13  14 1570.70 383.607   1
  -3 -13  13 579.634 242.284   1
  -3  13  13 475.639 239.847   1
   3 -13 -13 688.691 265.667   3
  -3 -13  13 299.752 206.077   2
   3 -13 -12-167.012 193.088   3
  -3 -13  12 166.346 160.259   1
  -3 -13  12-215.601 247.146   2
  -3  13  12 47.4365 207.430   1
  -3 -13  11 538.692 223.106   2
  -3 -13  11 300.287 176.915   1
   3 -13 -11 225.730 171.668   3
  -3 -13  10-85.1786 138.992   1
  -3 -13  10 73.3786 196.283   2
   3 -13 -10-97.3217 194.570   3
  -3  13  10 93.7248 109.062   5
  -3  13   9 2407.16 227.558   5
  -3 -13   9 2925.55 337.323   2
  -3 -13   9 2659.70 292.763   1
   3 -13  -9 3159.10 364.842   3
  -3  13   8 514.794 130.368   5
  -3 -13   8 679.821 208.948   2
   3 -13  -8 645.642 217.335   3
  -3 -13   8 969.895 189.856   1
  -3 -13   7 2035.78 231.358   1
  -3  13   7 1625.97 210.880   5
  -3 -13   7 1636.81 266.692   2
  -3  13   6 2671.06 261.176   5
   3  13  -6 2353.10 201.333   1
  -3 -13   6 2723.69 293.361   2
   3 -13  -6 2888.19 308.789   6
   3 -13  -5 1436.51 227.166   6
  -3 -13   5 1372.70 216.517   2
   3  13  -5 1777.47 169.456   1
  -3  13   4 1341.13 107.849   2
   3 -13  -4 1214.11 205.477   6
  -3 -13   4 1304.12 204.937   2
   3  13  -4 1504.37 155.227   1
   3  13  -4 1279.39 234.413   5
   3 -13  -3 513.651 169.205   6
   3  13  -3 546.724 103.319   1
   3  13  -3 469.657 184.534   5
  -3  13   3 501.613 67.9740   2
  -3 -13   3 781.189 197.918   2
  -3 -13   2 6125.58 392.618   2
  -3 -13   2 5906.36 234.143   6
   3  13  -2 6049.58 298.065   1
   3  13  -2 6057.40 452.635   5
  -3 -13   1 341.049 77.7034   6
   3  13  -1 408.835 197.496   5
   3  13   0 4714.55 401.290   5
   3 -13   0 4876.86 206.814   2
   3  13   1 319.903 155.065   5
   3 -13   1 376.495 80.1320   2
   3 -13   2 4387.50 241.933   2
   3  13   2 4386.56 373.211   5
   3 -13   3 5677.59 305.971   2
   3  13   3 5101.48 402.756   5
   3  13   4 20870.9 832.059   5
   3  13   4 22159.0 786.062   1
  -3 -13  -4 21755.5 736.479   3
   3  13   5 4636.01 396.328   5
   3 -13   5 4713.60 432.089   1
   3  13   5 4596.10 377.523   1
  -3 -13  -5 4280.37 325.701   3
  -3 -13  -6 390.640 143.284   3
   3  13   6 419.566 178.117   5
   3  13   6 239.172 155.328   1
   3 -13   6 395.137 178.089   1
   3  13   7 3855.16 409.504   1
   3  13   7 3216.79 339.304   5
  -3 -13  -7 3775.93 344.825   3
   3 -13   7 3633.94 404.029   1
  -3 -13  -8 2222.72 292.943   3
   3  13   8 1994.54 318.519   1
   3  13   8 2354.03 297.267   5
   3 -13   8 2113.31 334.864   1
   3  13   9 1887.91 281.306   5
   3 -13   9 2634.57 386.728   1
   3  13   9 1718.50 307.111   1
  -3 -13  -9 1817.42 271.408   3
   3 -13  10 1613.50 339.438   1
   3  13  10 1548.81 311.988   1
   3  13  10 1522.44 270.403   5
   3  13  11 36.2349 221.350   1
   3 -13  11 37.1316 218.735   1
   3  13  11 311.829 178.205   5
   3  13  12 1366.56 337.930   1
   3 -13  12 1534.83 360.375   1
   3 -13  13 132.700 237.656   1
   3  13  13 74.7557 223.950   1
   3 -13  14 2302.66 474.226   1
   3  13  14 1041.75 327.868   1
  -3 -14  17 1836.18 360.654   1
  -3  14  16 8975.09 774.870   1
  -3 -14  16 8951.40 714.469   2
  -3 -14  16 7754.91 622.792   1
  -3 -14  15 868.044 262.089   1
  -3  14  15 595.137 282.866   1
   3 -14 -15 921.790 309.348   3
  -3 -14  15 654.024 267.144   2
  -3 -14  14 8135.09 652.789   2
  -3  14  14 8013.92 694.535   1
  -3 -14  14 7207.68 590.096   1
   3 -14 -14 7548.13 628.898   3
  -3 -14  13 108.053 169.183   1
  -3  14  13-95.0926 252.484   1
  -3 -14  13 194.560 221.289   2
   3 -14 -13 547.347 236.813   3
  -3  14  12 8037.66 659.237   1
   3 -14 -12 7475.00 597.536   3
  -3 -14  12 6510.86 519.138   1
  -3 -14  12 7041.94 571.761   2
  -3 -14  11 12501.3 724.229   2
   3 -14 -11 12347.3 737.742   3
  -3 -14  11 11294.1 634.529   1
   3 -14 -10 5994.35 513.571   3
  -3 -14  10 6432.85 503.566   2
  -3 -14  10 6338.80 455.438   1
  -3  14  10 6251.04 360.532   5
   3 -14  -9 2032.78 312.491   3
  -3  14   9 2503.98 241.004   5
  -3 -14   9 2433.65 341.206   2
  -3 -14   9 2239.18 261.406   1
   3 -14  -8 1218.36 260.934   3
  -3 -14   8 1154.42 269.115   2
  -3 -14   8 893.401 185.226   1
  -3  14   8 679.397 155.393   5
  -3 -14   7 3274.88 332.418   2
  -3  14   7 3560.70 310.495   5
   3 -14  -6 4999.00 400.985   6
  -3 -14   6 4750.80 381.690   2
  -3  14   6 4765.06 358.170   5
   3  14  -5 16918.1 539.546   1
   3 -14  -5 17770.0 730.860   6
  -3 -14   5 17935.4 713.946   2
  -3  14   5 17511.0 457.726   2
   3  14  -5 18130.7 803.272   5
  -3  14   4 8806.14 277.977   2
   3  14  -4 8561.44 548.008   5
  -3 -14   4 9138.66 502.450   2
   3 -14  -4 8241.50 480.822   6
   3  14  -4 8945.51 372.095   1
   3 -14  -3 9816.86 516.211   6
  -3 -14   3 10560.2 518.911   2
   3  14  -3 9423.23 577.750   5
   3  14  -3 10448.1 401.704   1
  -3  14   3 9411.54 271.184   2
   3  14  -2 7407.30 505.501   5
   3  14  -2 7100.57 336.820   1
  -3 -14   2 6799.23 259.283   6
   3  14  -1 15610.2 728.105   5
  -3 -14   1 15343.5 407.135   6
   3  14   0 11394.4 626.690   5
   3 -14   0 12001.9 348.609   2
   3 -14   1 13841.6 415.335   2
   3  14   1 13886.2 679.846   5
   3  14   2 6550.01 473.478   5
   3 -14   2 6659.55 311.855   2
   3 -14   3 3254.17 237.438   2
   3  14   3 3433.53 350.487   5
   3  14   4 14026.2 699.543   5
  -3 -14  -4 15248.5 617.069   3
  -3 -14  -5 170.650 132.509   3
   3  14   5 306.427 181.470   1
   3  14   5 197.057 154.312   5
  -3 -14  -6 23980.3 842.693   3
   3  14   6 23302.2 907.388   1
   3  14   6 23762.0 932.324   5
   3 -14   6 25872.7 1029.97   1
   3  14   7 6519.55 492.073   1
   3 -14   7 7295.12 577.483   1
   3  14   7 5985.34 464.056   5
  -3 -14  -7 6382.14 443.948   3
   3  14   8 5092.39 433.927   5
  -3 -14  -8 5478.09 423.671   3
   3 -14   8 5300.55 512.885   1
   3  14   8 5516.48 487.607   1
  -3 -14  -9 2893.76 333.047   3
   3 -14   9 2614.66 388.392   1
   3  14   9 2786.93 375.837   1
   3  14   9 2876.10 344.353   5
   3  14  10 7798.35 539.459   5
   3  14  10 7912.08 634.038   1
   3 -14  10 8512.15 680.644   1
  -3 -14 -10 7964.38 543.458   3
   3  14  11 1192.83 306.348   1
   3 -14  11 1541.30 340.069   1
   3 -14  12 2388.66 388.629   1
   3  14  12 1631.12 345.454   1
   3 -14  13 2327.11 422.410   1
   3  14  13 2155.60 405.647   1
   3 -14  14 4231.64 540.357   1
   3  14  14 4308.32 554.494   1
  -3 -15  16 326.325 285.260   2
  -3 -15  16 555.329 246.474   1
  -3  15  16 582.873 324.476   1
   3 -15 -16 532.745 299.794   3
  -3  15  15 1777.76 380.444   1
   3 -15 -15 1444.50 350.066   3
  -3 -15  15 1932.24 375.758   2
  -3 -15  15 1781.72 336.655   1
  -3 -15  14-59.6447 182.813   1
  -3  15  14 241.300 251.091   1
   3 -15 -14-123.462 215.772   3
  -3 -15  14 275.396 212.202   2
  -3 -15  13 93.0670 164.568   1
  -3 -15  13 186.388 219.167   2
  -3  15  13 170.615 247.472   1
   3 -15 -13 378.002 316.729   3
   3 -15 -12 602.733 234.701   3
  -3 -15  12 364.368 231.794   2
  -3 -15  12 274.940 190.240   1
  -3  15  12 578.014 238.438   1
  -3 -15  11 124.965 207.038   2
   3 -15 -11-159.229 211.908   3
  -3 -15  11-110.330 170.628   1
   3 -15 -10 190.991 196.191   3
  -3  15  10 121.200 113.118   5
  -3 -15  10-124.482 145.363   1
  -3 -15  10 307.439 213.545   2
  -3  15   9 1814.59 255.141   5
  -3 -15   9 2340.94 317.698   2
   3 -15  -9 1816.74 317.822   3
  -3 -15   9 1857.56 252.449   1
  -3 -15   8 904.546 214.345   2
  -3  15   8 801.000 171.833   5
   3 -15  -8 874.589 236.911   3
  -3  15   7 2029.35 248.974   5
  -3 -15   7 2137.75 303.850   2
  -3 -15   6 2529.10 296.696   2
   3 -15  -6 1780.96 261.646   6
  -3  15   6 2307.65 276.040   5
   3 -15  -5 531.328 168.253   6
  -3  15   5 568.831 95.3153   2
  -3 -15   5 534.323 178.638   2
   3  15  -5 506.294 175.411   5
   3  15  -4 25.6473 192.223   5
  -3 -15   4-21.3078 143.914   2
   3  15  -4 34.5945 85.4330   1
   3 -15  -4 300.460 175.327   6
  -3  15   4-28.6598 52.8048   2
   3  15  -3 2523.78 214.667   1
   3 -15  -3 2776.37 299.265   6
   3  15  -3 2993.25 360.270   5
  -3 -15   3 2865.02 299.646   2
   3  15  -2 74.6486 183.126   5
   3  15  -2 240.027 85.3481   1
  -3 -15   2 354.770 82.9681   6
  -3 -15   1 3747.42 198.623   6
   3  15  -1 3947.89 390.087   5
   3  15   0 1389.60 273.495   5
   3 -15   1 11873.9 388.557   2
   3  15   1 12049.2 659.674   5
   3 -15   2 10765.8 401.574   2
   3  15   2 9766.36 595.676   5
   3 -15   3 7935.41 364.359   2
   3  15   3 7725.99 532.308   5
  -3 -15  -4 259.056 140.240   3
   3  15   4 334.744 188.309   5
   3 -15   4 111.488 109.274   2
   3  15   5-46.9128 154.728   5
   3 -15   5 93.3685 126.178   2
   3  15   5-46.5856 150.199   1
  -3 -15  -5-97.2473 147.744   3
   3  15   6 7255.77 519.190   5
   3  15   6 6550.68 480.242   1
  -3 -15  -6 7057.65 464.862   3
  -3 -15  -7 5589.37 420.212   3
   3 -15   7 5516.31 501.952   1
   3  15   7 4669.73 437.136   1
   3  15   7 4648.50 416.957   5
   3  15   8-14.5777 181.472   1
   3 -15   8 197.123 210.075   1
  -3 -15  -8 117.631 162.775   3
   3  15   8-401.243 212.879   5
   3  15   9 500.383 198.834   5
  -3 -15  -9 428.687 190.507   3
   3  15   9 417.570 225.189   1
   3 -15   9 611.880 255.695   1
  -3 -15 -10 1403.76 244.370   3
   3  15  10 1167.77 256.912   5
   3  15  10 1530.09 326.637   1
   3 -15  10 1124.67 306.735   1
   3 -15  11 3873.49 488.497   1
   3  15  11 3877.03 483.040   1
   3 -15  12-394.871 258.991   1
   3  15  12 24.0646 214.789   1
   3  15  13 2754.90 452.908   1
   3 -15  13 2308.96 425.725   1
   3  15  14 18.2408 242.666   1
   3 -15  14-32.1675 239.695   1
   3 -16 -16-122.888 222.836   3
  -3 -16  16 56.6856 235.027   2
  -3  16  15 5288.61 605.351   1
  -3 -16  15 5697.90 567.861   2
   3 -16 -15 4732.51 529.212   3
  -3 -16  14 211.300 204.470   1
  -3  16  14 189.679 281.062   1
   3 -16 -14 182.972 249.475   3
  -3 -16  14-351.938 241.958   2
  -3 -16  13 4233.13 461.737   2
  -3 -16  13 4518.62 430.916   1
  -3  16  13 4732.16 556.793   1
   3 -16 -13 5507.98 535.414   3
   3 -16 -12-174.566 346.945   3
  -3 -16  12-11.3174 179.837   1
  -3  16  12-89.7587 237.575   1
  -3 -16  12-3.80256 192.599   2
   3 -16 -11 12022.7 746.206   3
  -3 -16  11 11019.4 685.609   2
  -3 -16  11 10792.1 622.737   1
   3 -16 -10 2211.38 347.319   3
  -3  16  10 2025.88 233.543   5
  -3 -16  10 2193.60 327.830   2
  -3 -16  10 1634.26 253.379   1
  -3  16   9 9577.18 498.693   5
   3 -16  -9 9438.90 642.356   3
  -3 -16   9 9445.53 604.782   2
  -3  16   8 2289.68 268.306   5
   3 -16  -8 2218.52 317.158   3
  -3 -16   8 2290.28 300.630   2
  -3  16   7 4169.13 365.141   5
  -3 -16   7 3525.81 368.068   2
  -3 -16   6 780.918 187.150   2
  -3  16   6 850.324 195.381   5
   3 -16  -6 793.238 201.591   6
   3 -16  -5 20593.1 813.854   6
   3  16  -5 20301.3 916.878   5
  -3 -16   5 21601.7 821.419   2
   3 -16  -4 3032.24 326.013   6
   3  16  -4 3095.75 367.789   5
  -3 -16   4 3238.99 326.192   2
  -3  16   4 3127.38 165.260   2
  -3 -16   3 42138.7 1166.10   2
   3  16  -3 40363.0 1339.47   5
   3 -16  -3 39780.4 1155.61   6
   3  16  -2 12.0065 182.618   5
  -3 -16   2 307.858 78.8787   6
  -3 -16   1 16214.1 452.864   6
   3  16  -1 16878.6 810.396   5
   3  16   0 53.4679 184.711   5
   3  16   1 20748.3 903.613   5
   3 -16   1 22316.7 571.970   2
   3  16   2 952.774 223.711   5
   3 -16   2 1644.39 171.789   2
   3 -16   3 3331.77 245.776   2
   3  16   3 3340.21 379.621   5
   3 -16   4 160.468 119.284   2
   3  16   4 12.8543 169.933   5
   3 -16   5 16924.4 633.486   2
   3  16   5 16036.9 736.739   1
   3  16   5 15699.0 785.172   5
  -3 -16  -5 17286.3 713.254   3
   3  16   6 426.045 191.134   1
   3 -16   6 249.581 162.712   2
   3  16   6 451.663 188.952   5
  -3 -16  -6 262.193 155.058   3
   3  16   7 16629.8 808.971   5
   3  16   7 15553.4 791.050   1
  -3 -16  -7 16807.3 739.574   3
   3  16   8 3012.08 385.272   1
   3  16   8 3339.70 374.399   5
   3 -16   8 3925.33 458.619   1
  -3 -16  -8 3170.98 347.957   3
   3  16   9 7645.23 549.811   5
   3  16   9 7864.62 620.250   1
   3 -16   9 8656.06 678.574   1
  -3 -16  -9 8295.14 552.308   3
  -3 -16 -10 707.261 205.157   3
   3  16  10 812.927 218.649   5
   3 -16  10 263.872 208.479   1
   3  16  10 614.870 251.173   1
   3  16  11 1145.84 306.277   1
   3 -16  11 2486.86 409.175   1
   3 -16  12-70.8510 269.266   1
   3  16  12 218.879 241.052   1
   3 -16  13 6421.08 643.968   1
   3  16  13 5928.17 608.788   1
   3 -17 -15-1.12015 239.784   3
  -3  17  15 507.563 286.555   1
  -3 -17  15 410.465 264.647   2
  -3  17  14 2487.84 423.077   1
   3 -17 -14 2156.34 381.473   3
  -3 -17  14 2862.73 418.841   2
  -3  17  13 554.124 272.074   1
   3 -17 -13 492.038 238.339   3
  -3 -17  13 80.0300 174.924   1
  -3 -17  13 542.664 250.539   2
  -3 -17  12 184.242 198.215   2
   3 -17 -12 136.582 180.803   3
  -3 -17  12-82.4563 190.557   1
   3 -17 -11-221.013 223.791   3
  -3 -17  11-130.343 163.372   1
  -3 -17  11-101.188 194.899   2
   3 -17 -10-169.119 215.268   3
  -3  17  10 247.854 154.116   5
  -3 -17  10 362.878 209.349   2
  -3  17   9 1541.29 239.174   5
  -3 -17   9 2304.50 331.763   2
   3 -17  -9 1496.33 278.276   3
   3 -17  -8 406.148 223.189   3
  -3  17   8 39.3614 149.838   5
  -3 -17   8 60.1501 169.903   2
  -3 -17   7 2155.40 297.134   2
  -3  17   7 1674.93 245.241   5
   3  17  -6 1181.20 258.367   5
  -3 -17   6 1027.07 218.970   2
  -3  17   6 1549.29 264.563   5
  -3  17   5 670.177 193.445   5
  -3 -17   5 1236.40 258.438   2
   3  17  -5 1068.22 271.619   5
   3 -17  -5 929.946 221.535   6
  -3 -17   4 473.451 183.241   2
   3  17  -4 329.829 237.894   5
   3 -17  -4 467.016 183.596   6
   3 -17  -3 480.645 196.365   6
  -3 -17   3 339.229 164.929   2
   3  17  -3 529.532 246.538   5
  -3 -17   2 199.640 78.7379   6
   3  17  -2 178.260 197.259   5
   3  17  -1 2339.43 338.788   5
   3  17   0 408.806 227.909   5
   3  17   1 1568.66 307.386   5
   3 -17   1 1569.29 162.724   2
   3 -17   2 3152.92 232.388   2
   3  17   2 2953.54 376.995   5
   3 -17   3 1632.25 196.476   2
   3  17   3 2115.18 317.936   5
   3 -17   4 493.348 134.809   2
   3  17   4 314.901 201.061   5
   3 -17   5 6939.03 408.226   2
   3  17   5 6658.92 521.532   5
  -3 -17  -5 7492.33 473.953   3
   3  17   5 6270.63 467.159   1
   3  17   6 1449.55 277.489   1
   3 -17   6 1347.77 216.251   2
   3  17   6 1395.25 284.468   5
  -3 -17  -6 1380.23 228.545   3
  -3 -17  -7 1229.77 227.927   3
   3  17   7 1482.56 291.004   5
   3 -17   7 1335.00 228.375   2
   3  17   7 1094.20 254.762   1
   3  17   8 12.5535 170.933   1
   3  17   8 163.783 172.432   5
  -3 -17  -8-101.156 168.294   3
   3  17   9 2352.19 337.742   5
   3  17   9 2344.88 376.631   1
  -3 -17  -9 2257.70 309.941   3
   3 -17   9 2819.18 396.439   1
   3  17  10 1347.81 265.032   5
  -3 -17 -10 551.590 197.154   3
   3  17  10 1001.55 297.270   1
   3 -17  10 591.231 302.021   1
   3  17  11 601.624 254.140   1
  -3 -17 -11 610.855 203.454   3
   3 -17  11 969.805 303.462   1
   3 -17  12 241.663 251.967   1
   3  17  12 650.256 289.922   1
   3 -17  13 848.051 321.398   1
   3  17  13 873.873 314.838   1
   3 -18 -15 3998.54 499.573   3
  -3 -18  15 3961.96 480.872   2
  -3  18  14 7620.86 714.274   1
  -3 -18  14 7259.56 616.134   2
   3 -18 -14 5785.23 582.670   3
   3 -18 -13 21.7377 215.624   3
  -3  18  13-18.6290 229.982   1
  -3 -18  13 19.7578 209.317   2
   3 -18 -12 2955.22 404.954   3
  -3 -18  12 2564.67 388.426   2
   3 -18 -11 2962.26 402.935   3
  -3 -18  11 2960.89 381.135   2
   3 -18 -10 7619.43 614.590   3
  -3 -18  10 6407.39 536.901   2
  -3  18   9 625.555 182.261   5
  -3 -18   9 1145.10 262.972   2
   3 -18  -9 821.929 243.944   3
  -3  18   8 10719.3 582.383   5
  -3 -18   8 10867.9 638.890   2
   3 -18  -8 10310.8 670.960   3
  -3 -18   7 4042.60 390.307   2
   3  18  -7 4239.83 459.635   5
  -3  18   7 3830.48 382.506   5
  -3 -18   6 15883.6 740.834   2
   3  18  -6 15804.5 860.719   5
  -3  18   6 15334.6 735.749   5
   3 -18  -5 1113.88 225.146   6
  -3  18   5 892.690 229.953   5
  -3 -18   5 674.539 207.842   2
   3  18  -5 877.085 254.831   5
   3  18  -4 20778.4 982.517   5
  -3 -18   4 21592.4 830.115   2
   3 -18  -4 20322.7 829.700   6
   3  18  -3 3259.84 414.920   5
   3 -18  -3 2776.58 327.416   6
   3 -18  -2 4689.26 396.697   6
  -3 -18   2 4871.50 249.568   6
   3  18  -2 4909.99 486.872   5
   3  18  -1 308.702 196.800   5
   3  18   0 1757.23 314.028   5
   3  18   1 7845.94 596.838   5
   3  18   2 39857.7 1356.07   5
   3 -18   2 40522.5 908.167   2
   3 -18   3 4286.11 282.181   2
   3  18   3 3824.79 428.518   5
   3 -18   4 8714.53 418.776   2
   3  18   4 6999.06 555.193   5
   3 -18   5 731.322 163.274   2
   3  18   5 944.903 221.894   1
   3  18   5 1053.32 259.715   5
  -3 -18  -5 996.288 210.473   3
   3 -18   6 5870.20 389.139   2
  -3 -18  -6 5915.77 452.901   3
   3  18   6 5571.42 467.665   1
   3  18   6 5318.69 486.191   5
   3  18   7 105.571 196.962   5
   3  18   7-144.363 197.122   1
  -3 -18  -7 338.286 171.672   3
   3 -18   7 368.200 154.758   2
   3 -18   8 10000.0 574.730   2
  -3 -18  -8 9254.94 583.423   3
   3  18   8 9366.82 657.512   1
   3  18   8 9779.19 645.761   5
   3  18   9 4972.10 469.216   5
   3 -18   9 4896.68 425.560   2
   3  18   9 3925.36 462.186   1
  -3 -18  -9 5011.55 437.883   3
  -3 -18 -10 97.2082 170.320   3
   3  18  10 15.0955 200.637   1
   3 -18  10 316.222 249.656   1
   3  18  11 5033.69 561.182   1
   3 -18  11 5020.63 575.397   1
  -3 -18 -11 4834.06 449.129   3
   3  18  12 2564.74 421.254   1
   3 -18  12 1986.38 392.412   1
   3  18  13 1866.67 382.964   1
   3 -18  13 1648.21 370.300   1
  -3 -19  15 207.174 240.864   2
   3  19 -15 339.516 241.826   5
  -3  19  14 319.332 279.515   1
  -3 -19  14 245.660 252.690   2
   3 -19 -14 267.462 248.311   3
   3 -19 -13 466.776 258.085   3
  -3  19  13 469.444 257.555   1
  -3 -19  13 674.492 265.550   2
  -3 -19  12 291.592 207.865   2
   3 -19 -12-623.866 273.117   3
  -3 -19  11 358.442 232.364   2
   3 -19 -11 142.003 214.852   3
  -3 -19  10-184.039 187.360   2
   3 -19 -10 53.2011 221.558   3
  -3  19   9-238.525 182.138   5
   3 -19  -9 231.325 229.736   3
  -3 -19   9 304.997 190.831   2
   3  19  -8 119.347 210.267   5
  -3 -19   8 388.180 210.496   2
   3 -19  -8 221.444 222.279   3
  -3  19   8 120.515 161.073   5
  -3  19   7-50.6460 161.097   5
  -3 -19   7 194.755 199.313   2
  -3 -19   6 5751.39 470.850   2
  -3  19   6 4997.07 446.212   5
   3  19  -6 6024.10 550.652   5
   3  19  -5 574.893 242.011   5
  -3  19   5 33.2702 162.396   5
   3 -19  -5 231.065 158.186   6
  -3 -19   5 41.7902 165.069   2
  -3 -19   4 10829.2 601.908   2
   3  19  -4 10841.3 723.305   5
   3 -19  -4 10754.0 604.820   6
  -3 -19   3 10200.1 387.689   6
   3  19  -3 11358.5 730.858   5
   3 -19  -3 10958.4 605.828   6
   3 -19  -2 3374.78 334.839   6
  -3 -19   2 2745.13 193.926   6
   3  19  -2 2613.67 400.967   5
   3  19  -1-334.021 244.580   5
   3  19   0 217.441 208.679   5
   3  19   1 1339.15 297.672   5
   3 -19   2 1401.50 179.432   2
   3  19   2 1833.01 354.452   5
   3 -19   3 176.537 109.321   2
   3  19   3-5.34665 207.972   5
   3 -19   4 1180.38 183.627   2
   3  19   4 935.615 243.369   5
   3  19   5 64.9103 194.375   1
  -3 -19  -5 96.6074 139.886   3
   3  19   5 137.913 175.899   5
   3 -19   5 212.694 128.688   2
   3  19   6 4169.65 444.959   5
  -3 -19  -6 4753.42 417.812   3
   3 -19   6 4742.93 352.716   2
   3  19   6 3910.34 396.052   1
   3 -19   7 32.1561 152.323   2
   3  19   7 12.2216 170.455   5
   3  19   7 81.6760 163.457   1
  -3 -19  -7-301.207 199.532   3
   3 -19   8 4259.78 375.056   2
   3  19   8 4668.03 476.214   1
   3  19   8 3870.01 430.384   5
  -3 -19  -8 4282.81 409.252   3
   3  19   9 75.6401 196.958   5
   3 -19   9 334.128 193.692   2
   3  19   9 201.026 213.839   1
  -3 -19  -9 568.887 208.193   3
  -3 -19 -10 1528.13 281.373   3
   3 -19  10 1469.18 274.905   2
   3  19  10 1150.21 294.307   1
   3  19  11-242.383 213.521   1
   3 -19  12 4809.40 563.114   1
   3  19  12 3836.56 504.007   1
   3  20 -15 1325.64 334.772   5
   3  20 -14 3207.55 461.666   5
  -3 -20  14 3326.11 436.113   2
   3 -20 -14 2663.62 425.129   3
   3  20 -13 1755.19 350.580   5
  -3  20  13 2247.65 423.764   1
   3 -20 -13 1359.25 323.086   3
  -3 -20  13 1428.43 304.206   2
   3 -20 -12 3945.13 470.198   3
  -3 -20  12 4823.72 499.309   2
   3 -20 -11 2894.39 427.969   3
  -3 -20  11 2877.55 393.501   2
   3 -20 -10 2400.15 373.893   3
   3  20 -10 3091.11 448.281   5
  -3 -20  10 3451.91 412.691   2
  -3  20   9 940.503 219.716   5
   3 -20  -9 969.100 269.941   3
   3  20  -9 948.888 302.633   5
  -3 -20   9 1042.23 248.417   2
  -3 -20   8 12284.5 688.530   2
  -3  20   8 11950.7 665.459   5
   3  20  -8 12424.2 809.786   5
   3 -20  -8 12439.1 764.235   3
  -3  20   7 1558.01 271.734   5
  -3 -20   7 1198.14 251.607   2
   3  20  -7 1720.90 351.893   5
  -3  20   6 7932.49 559.046   5
   3  20  -6 7939.90 645.525   5
  -3 -20   6 8307.48 547.537   2
   3  20  -5 3316.94 435.515   5
  -3  20   5 3585.85 397.739   5
   3 -20  -5 3351.59 368.613   6
  -3 -20   5 3530.10 361.744   2
   3  20  -4 9069.32 682.054   5
  -3 -20   4 9135.75 559.412   2
   3 -20  -4 9375.21 577.904   6
   3  20  -3 4096.59 481.442   5
   3 -20  -3 3724.15 357.313   6
   3 -20  -2 3284.58 347.753   6
   3  20  -2 2958.24 413.543   5
   3  20  -1 1373.05 305.003   5
   3  20   0 5987.30 551.163   5
   3  20   1 8248.37 639.304   5
   3  20   2 16524.5 890.182   5
   3  20   3 3672.23 425.945   5
   3  20   4 2764.59 385.646   5
   3  20   5 775.520 223.517   1
   3  20   5 618.553 237.609   5
  -3 -20  -5 828.531 214.291   3
  -3 -20  -6 4809.95 422.118   3
   3  20   6 5223.51 474.286   1
   3  20   6 4519.62 477.447   5
   3  20   7 2994.17 403.032   5
  -3 -20  -7 1774.62 275.320   3
   3  20   7 2591.42 356.430   1
   3  20   8 5921.69 529.646   1
   3  20   8 5504.01 515.996   5
  -3 -20  -8 6202.38 486.799   3
   3  20   9 858.658 260.694   5
  -3 -20  -9 305.919 171.338   3
   3  20  10 6098.32 565.511   1
   3  20  11 378.292 239.723   1
   3  20  12 1944.64 383.976   1
  -3 -21  14 321.863 252.091   2
   3  21 -14-421.268 262.780   5
   3 -21 -13 224.560 221.728   3
  -3 -21  13 700.720 246.620   2
   3  21 -13 285.330 232.829   5
   3 -21 -12 590.611 259.210   3
  -3 -21  12 1389.57 322.500   2
   3  21 -12 701.192 268.864   5
   3 -21 -11 536.646 238.380   3
  -3 -21  11 208.238 212.825   2
   3  21 -11 988.979 314.353   5
   3  21 -10-138.664 236.639   5
   3 -21 -10-188.250 234.885   3
  -3 -21  10 78.5468 181.661   2
   3 -21  -9 488.204 230.807   3
  -3 -21   9 852.799 249.325   2
   3  21  -9 886.247 305.948   5
   3 -21  -8-8.56173 195.500   3
  -3  21   8-139.362 203.292   5
   3  21  -8 416.101 261.691   5
  -3 -21   8 632.421 232.001   2
  -3  21   7 144.365 173.098   5
  -3 -21   7 195.239 178.882   2
   3  21  -7 68.1763 216.401   5
  -3  21   6 326.765 178.713   5
   3  21  -6 383.428 272.875   5
  -3 -21   6 622.391 212.506   2
  -3 -21   5 1784.22 299.752   2
  -3  21   5 1600.88 310.918   5
   3 -21  -5 1656.68 276.732   6
   3  21  -5 1779.83 360.921   5
  -3  21   4 77.8779 181.352   5
   3  21  -4 384.298 246.848   5
   3 -21  -4 347.165 172.501   6
   3 -21  -3 965.554 235.001   6
   3  21  -3 669.096 291.994   5
   3  21  -2 662.613 285.842   5
   3 -21  -2 145.746 166.721   6
   3 -21  -1 17.4911 146.414   6
   3  21  -1-24.9920 224.297   5
   3  21   0 284.662 208.849   5
   3  21   1 811.784 270.122   5
   3  21   2 1332.33 295.760   5
   3  21   3 10.9117 194.836   5
   3  21   4 1805.92 335.894   5
  -3 -21  -5 1599.40 266.094   3
   3  21   5 642.143 246.695   5
   3  21   5 889.146 210.963   1
  -3 -21  -6 3037.52 349.760   3
   3  21   6 3200.28 414.324   5
   3  21   6 2773.74 360.025   1
   3  21   7 476.887 229.973   5
   3  21   7 805.605 267.664   1
  -3 -21  -7 612.191 195.463   3
   3  21   8 890.578 257.660   5
   3  21   8 736.580 243.377   1
  -3 -21  -8 939.976 229.156   3
   3  21   9 401.290 254.457   1
   3  21  10 147.896 209.218   1
   3  21  11 1094.47 312.160   1
  -3 -22  13 1497.94 330.659   2
   3  22 -13 1668.54 350.124   5
   3  22 -12 416.601 286.330   5
  -3 -22  12 18.6785 193.962   2
   3 -22 -12 57.1978 222.103   3
  -3 -22  11 6435.45 543.447   2
   3 -22 -11 5835.37 572.836   3
   3  22 -11 6901.62 655.598   5
  -3 -22  10 494.612 225.933   2
   3 -22 -10 134.374 214.448   3
   3  22 -10 101.446 265.678   5
   3 -22  -9 8378.61 664.196   3
   3  22  -9 10382.8 779.130   5
  -3 -22   9 10000.9 642.982   2
  -3  22   8 2025.01 320.624   5
  -3 -22   8 1446.11 277.377   2
   3  22  -8 1833.84 382.850   5
  -3  22   7 10210.3 659.914   5
  -3 -22   7 11568.0 669.012   2
   3  22  -7 11078.6 801.485   5
  -3  22   6 405.456 207.447   5
  -3 -22   6 343.927 199.915   2
   3  22  -6 442.546 276.767   5
   3  22  -5 12134.6 817.152   5
  -3  22   5 12470.1 757.491   5
   3 -22  -5 12719.1 694.882   6
  -3 -22   5 12178.8 664.914   2
   3  22  -4 197.599 253.636   5
  -3  22   4-109.182 204.862   5
   3 -22  -4 99.5401 153.180   6
   3  22  -3 13977.7 888.909   5
   3 -22  -3 15583.6 749.572   6
   3  22  -2 231.835 226.631   5
   3 -22  -2 278.068 176.076   6
   3  22  -1 5022.68 534.941   5
   3 -22  -1 6133.50 470.966   6
   3  22   0-227.726 255.116   5
   3  22   1 9097.71 696.286   5
   3  22   2-96.4220 220.999   5
   3  22   3 5927.23 562.352   5
   3  22   4 110.459 202.108   5
  -3 -22  -5 1490.49 260.165   3
   3  22   5 1262.53 265.789   1
   3  22   5 1727.72 344.149   5
  -3 -22  -6 1341.29 254.014   3
   3  22   6 1235.76 265.274   1
   3  22   6 1325.16 335.323   5
   3  22   7 7796.25 627.136   5
   3  22   7 8714.39 629.298   1
  -3 -22  -7 8329.75 568.795   3
   3  22   8 53.5016 201.886   5
   3  22   8 198.272 201.057   1
   3  22   9 5717.92 542.349   1
   3  22  10 734.204 286.307   1
   3  22  11 4068.80 497.767   1
  -3 -23  13 1288.64 329.890   2
  -3 -23  12-107.918 209.109   2
   3 -23 -11 197.620 206.452   3
  -3 -23  11 590.578 272.355   2
   3  23 -11-241.278 267.533   5
   3 -23 -10 108.215 214.993   3
   3  23 -10 523.992 281.323   5
  -3 -23  10 591.188 239.642   2
  -3 -23   9 440.946 230.053   2
   3  23  -9 114.937 246.942   5
   3 -23  -9-59.4733 211.505   3
   3 -23  -8 631.324 266.791   3
   3  23  -8 1392.58 369.267   5
  -3 -23   8 764.568 227.898   2
  -3  23   8 885.782 259.227   5
  -3 -23   7-293.627 208.040   2
  -3  23   7 33.9875 204.796   5
   3  23  -6-34.2766 231.806   5
  -3 -23   6-12.9066 165.067   2
  -3  23   6 360.624 210.437   5
   3  23  -5 529.161 288.431   5
  -3  23   5 332.289 205.235   5
   3 -23  -5 456.560 196.003   6
   3  23  -4 14.4299 239.124   5
  -3  23   4-124.580 211.214   5
   3 -23  -4 356.652 184.308   6
   3 -23  -3 411.511 192.398   6
  -3  23   3 808.276 276.813   5
   3  23  -3 270.757 238.627   5
   3 -23  -2 86.8293 171.068   6
   3  23  -2-59.7558 239.420   5
   3  23  -1 711.772 286.067   5
   3 -23  -1 955.440 234.378   6
   3  23   0 451.773 288.263   5
   3  23   1 3092.46 443.415   5
   3  23   2 159.177 214.150   5
   3  23   3-56.6397 217.762   5
   3  23   4 360.048 249.098   5
   3  23   5 6080.35 579.622   5
  -3 -23  -5 7562.32 540.694   3
   3  23   5 7428.82 548.857   1
   3  23   6 444.870 251.304   5
  -3 -23  -6 718.446 225.327   3
   3  23   6 927.236 260.216   1
   3  23   7 3733.53 459.152   5
   3  23   7 3725.31 430.025   1
   3  23   8 1387.93 295.876   5
   3  23   8 1690.21 334.009   1
   3  23   9 287.010 208.688   1
   3  23  10 606.336 271.600   1
   3 -24 -10 4540.46 515.173   3
   3  24 -10 5433.87 602.000   5
  -3 -24   9 357.364 199.692   2
   3 -24  -9 609.904 262.420   3
   3  24  -8 3311.94 484.696   5
  -3 -24   8 3696.42 417.736   2
  -3  24   8 3740.31 432.253   5
   3 -24  -8 3345.48 439.301   3
  -3  24   7 1607.23 318.052   5
  -3 -24   7 1464.74 269.317   2
   3  24  -7 1926.19 397.223   5
  -3  24   6 6652.23 568.705   5
  -3 -24   6 6441.06 498.259   2
   3  24  -6 7375.39 683.017   5
   3  24  -5 3655.58 500.599   5
  -3  24   5 3426.90 441.470   5
   3 -24  -4 6485.25 497.612   6
  -3  24   4 6989.77 616.881   5
   3  24  -4 6856.18 655.897   5
   3 -24  -3 4943.24 439.267   6
  -3  24   3 4683.73 509.245   5
   3  24  -3 5916.65 623.213   5
   3 -24  -2 6631.36 502.624   6
   3  24  -2 6818.34 622.371   5
   3  24  -1 33.7254 231.715   5
   3 -24  -1 514.998 211.363   6
   3 -24   0 10868.2 636.416   6
   3  24   0 10921.3 787.700   5
   3  24   1 5151.42 555.000   5
   3  24   2 1885.07 386.460   5
   3  24   3 908.819 279.403   5
   3  24   4 1635.75 367.401   5
   3  24   5 2999.80 432.408   5
   3  24   6 1383.23 312.897   5
   3  24   7 1160.64 301.937   5
   3  24   8 1064.63 290.988   5
   3 -25  -9-63.3133 225.078   3
   3 -25  -8-228.342 243.740   3
   3  25  -8-169.370 269.662   5
  -3  25   7 142.103 205.970   5
   3  25  -7 817.734 334.852   5
   3  25  -6 147.723 293.336   5
  -3  25   6 446.587 248.729   5
   3  25  -5 326.394 272.506   5
  -3  25   5-121.166 213.089   5
  -3  25   4 764.532 244.434   5
   3 -25  -4 1445.00 271.372   6
   3  25  -4 708.835 286.257   5
   3 -25  -3-157.737 182.041   6
   3  25  -3-112.363 235.103   5
  -3  25   3 398.178 243.731   5
  -3  25   2 109.714 245.095   5
   3 -25  -2 177.551 167.812   6
   3  25  -2 471.380 260.298   5
   3 -25  -1 888.411 226.645   6
   3  25  -1 288.232 238.933   5
   3 -25   0 601.745 238.546   6
   3  25   0 1447.60 341.034   5
   3  25   1 192.314 249.892   5
   3  25   2 1589.38 359.964   5
   3  25   3-67.2426 241.476   5
   3  25   4 6009.36 597.288   5
   3  25   5 419.534 268.968   5
   3  25   6 895.915 293.133   5
   3  25   7-140.017 240.898   5
   3 -26  -8 1172.44 303.835   3
  -3  26   7 2511.29 372.989   5
  -3  26   6 4276.81 489.210   5
   3  26  -6 4862.34 600.518   5
  -3  26   5 1997.02 375.676   5
   3  26  -5 2809.94 452.590   5
   3  26  -4 1456.44 364.730   5
  -3  26   4 1602.29 346.571   5
  -3  26   3 2668.32 419.068   5
   3  26  -3 2182.65 433.089   5
   3  26  -2 9861.29 796.471   5
  -3  26   2 10757.6 789.486   5
   3  26  -1 256.482 274.295   5
   3  26   0 3287.56 490.604   5
   3  26   1 1371.18 344.691   5
   3  26   2 5558.32 591.667   5
   3  26   3 265.002 260.296   5
   3  26   4 5714.53 594.383   5
   3  26   5 6.33573 226.658   5
   3  26   6 3010.88 465.870   5
   3  26   7-384.646 303.423   5
  -3  27   6 167.167 238.607   5
  -3  27   5 1762.62 358.671   5
  -3  27   4-190.481 268.355   5
  -3  27   3 455.470 233.361   5
   3  27  -2-38.8876 248.667   5
  -3  27   2 261.386 267.529   5
   3  27  -1-21.4905 252.092   5
  -3  27   1 498.581 289.121   5
   3  27   0 1567.30 388.413   5
   3  27   1 268.512 250.985   5
   3  27   2 2179.26 410.377   5
   3  27   3-219.264 256.981   5
   3  27   4 110.776 240.937   5
  -3  28   6 518.647 318.395   5
  -3  28   5 7843.70 670.334   5
  -3  28   4 816.371 290.271   5
  -3  28   3 3863.76 519.345   5
  -4   0  19-49.5559 255.388   1
  -4   0  18 1000.40 328.384   1
  -4   0  17 180.681 238.764   1
  -4   0  16 1044.33 290.784   1
  -4   0  15-77.6252 206.219   1
  -4   0  14 622.908 243.845   1
  -4   0  13 171.648 200.749   1
  -4   0  12 4709.00 434.550   1
  -4   0  12 4938.96 239.019   4
  -4   0  11-253.320 174.142   1
   4   0 -11-29.3924 20.6841   5
  -4   0  11-29.0468 64.0178   4
   4   0 -11-2.90063 17.5392   5
  -4   0  10 8104.44 475.418   1
   4   0 -10 6483.96 164.500   5
  -4   0  10 7398.50 293.383   4
   4   0  -9-5.78419 22.0541   5
  -4   0   9-122.276 127.537   1
  -4   0   9-35.8210 68.6914   4
  -4   0   8 5695.62 254.952   4
  -4   0   8 5747.36 346.626   1
   4   0  -8 5042.32 150.607   5
   4   0  -7 17.2456 39.4238   5
  -4   0   7 3.47989 90.3174   1
  -4   0   7-43.2140 72.7100   4
  -4   0   6 728.695 140.875   6
   4   0  -6 774.852 77.1356   5
   4   0  -6 663.500 116.821   4
  -4   0   6 792.725 132.570   3
  -4   0   6 858.621 113.462   4
   4   0  -6 977.641 162.295   3
   4   0  -5-48.5894 100.662   3
  -4   0   5-72.7437 81.8876   4
   4   0  -5-5.23767 54.8446   5
  -4   0   5 103.559 90.3505   3
  -4   0   5 75.0276 84.1899   6
  -4   0   5 24.2087 49.7906   5
   4   0  -5-49.2063 83.5248   4
  -4   0   4 82321.7 1340.45   3
   4   0  -4 80311.2 1352.15   3
   4   0  -4 79669.9 1264.82   5
  -4   0   4 83172.3 1362.33   4
  -4   0   4 81218.2 1248.79   5
  -4   0   4 81425.4 1354.33   2
   4   0  -4 82134.8 1372.22   6
  -4   0   3-4.15185 62.0356   5
   4   0  -3 74.7264 84.5959   5
   4   0  -3 51.0982 75.6122   2
   4   0  -3 25.2304 84.2362   6
   4   0  -3-53.5247 101.594   4
  -4   0   3 32.1937 86.1202   4
   4   0  -3 32.5362 78.9072   3
   4   0  -2 27557.6 639.220   5
  -4   0   2 27238.3 607.437   2
   4   0  -2 27111.3 662.765   4
  -4   0   2 27319.3 613.133   5
  -4   0   2 27736.2 648.391   4
   4   0  -2 28777.2 592.288   2
  -4   0   1-66.0410 104.026   5
   4   0  -1 193.765 82.8635   1
   4   0  -1 21.4098 103.265   5
   4   0  -1-40.2855 122.627   4
  -4   0   1 52.7855 71.5175   1
  -4   0   0 2048.29 177.256   5
   4   0   0 1673.41 165.648   1
  -4   0   0 1835.03 155.070   1
   4   0   0 1964.60 191.967   5
   4   0   0 2073.97 194.891   4
  -4   0  -1 43.5496 84.2152   1
   4   0   1-5.78450 102.305   1
  -4   0  -1-22.0194 98.7439   5
   4   0   1 136.977 124.393   5
   4   0   2 4738.27 286.845   1
  -4   0  -2 4685.84 286.351   5
  -4   0  -2 4308.31 274.818   1
   4   0   2 4580.61 305.805   5
  -4   0  -3 84.4902 110.188   1
  -4   0  -3-63.6207 112.387   5
   4   0   3 255.455 161.101   1
   4   0   4 3209.69 315.621   1
   4   0   5 130.660 159.162   1
   4   0   6 2492.01 308.616   1
   4   0   7 26.8165 157.147   1
   4   0   8 7164.34 552.199   1
   4   0   9-143.070 203.609   1
   4   0  10 269.480 213.163   1
   4   0  11-298.181 209.915   1
   4   0  12 759.140 310.315   1
   4   0  13-213.988 239.060   1
   4   0  14-54.5237 245.232   1
   4   0  15 444.578 351.804   1
  -4  -1  19 67.8262 248.415   1
  -4   1  19 582.385 319.157   1
  -4  -1  18 2180.86 408.992   1
  -4   1  18 1861.57 393.991   1
  -4   1  17 552.042 268.924   1
  -4  -1  17 504.071 257.260   1
  -4   1  16 2656.60 403.844   1
  -4  -1  16 1066.14 296.524   1
  -4  -1  15 223.842 194.267   1
  -4   1  15 583.321 238.064   1
  -4   1  14 6753.73 552.542   1
  -4  -1  14 6776.20 536.586   1
  -4   1  13 1779.30 310.209   1
  -4  -1  13 1455.96 275.577   1
   4   1 -13 1385.16 100.038   5
  -4   1  12 8210.63 339.667   4
  -4  -1  12 9605.75 577.981   1
   4   1 -12 8132.00 247.591   5
  -4   1  12 8592.44 558.264   1
   4   1 -12 7610.32 244.532   5
  -4  -1  12 8879.69 288.751   4
  -4   1  11 5363.04 273.613   4
   4   1 -11 5096.48 194.222   5
  -4  -1  11 6199.38 438.660   1
  -4   1  11 5961.92 439.676   1
  -4  -1  11 5485.18 231.458   4
   4   1 -10 15649.4 377.827   5
  -4  -1  10 18471.7 452.477   4
  -4   1  10 17844.6 718.846   1
  -4   1  10 17981.8 517.097   4
  -4  -1  10 17847.9 707.869   1
   4   1  -9 134.628 55.6731   5
  -4   1   9 5.49990 68.6755   4
  -4  -1   9 78.3288 132.251   1
  -4  -1   9 165.077 70.3980   4
  -4   1   9 27.7105 131.225   1
  -4  -1   8 2552.25 164.720   4
  -4   1   8 2374.69 178.145   4
   4   1  -8 2344.80 130.349   5
  -4  -1   8 2577.71 234.324   1
   4  -1  -8 2784.41 270.226   3
  -4   1   8 2439.31 243.311   1
   4   1  -7 6826.43 225.744   5
  -4  -1   7 7291.08 363.694   1
  -4  -1   7 6929.71 270.412   4
  -4   1   7 6522.67 291.485   4
   4  -1  -7 7430.00 405.447   3
   4  -1  -6 13437.9 287.670   5
  -4  -1   6 15814.9 490.867   1
   4   1  -6 14914.6 423.198   4
  -4   1   6 15310.4 454.190   4
  -4  -1   6 15823.1 506.723   3
   4   1  -6 16124.8 375.672   5
  -4   1   6 15578.2 519.242   3
  -4  -1   6 15873.8 427.893   4
  -4   1   6 15422.7 519.592   6
   4  -1  -6 15983.2 553.992   3
  -4  -1   5 752.337 124.611   6
   4  -1  -5 575.797 70.3071   5
   4   1  -5 477.841 98.4470   4
  -4  -1   5 401.416 95.9779   3
   4  -1  -5 397.379 110.430   4
   4  -1  -5 477.092 120.022   3
  -4  -1   5 451.893 80.8513   5
  -4   1   5 695.134 120.325   4
  -4   1   5 368.006 94.4978   6
  -4  -1   5 306.954 127.369   2
  -4  -1   5 734.356 101.445   4
  -4   1   5 590.115 69.6035   5
  -4   1   5 483.797 112.764   3
   4   1  -5 514.074 84.8331   5
   4  -1  -4 38802.5 709.371   5
  -4   1   4 39130.4 776.615   2
   4  -1  -4 41065.5 859.138   6
  -4  -1   4 41085.3 743.340   5
  -4  -1   4 40168.3 835.740   2
  -4  -1   4 39297.1 797.783   4
   4   1  -4 39964.5 809.981   4
  -4   1   4 40306.6 703.281   5
   4  -1  -4 40465.6 842.867   4
  -4   1   4 39778.0 819.212   4
  -4  -1   4 40759.7 781.679   3
   4   1  -4 39636.3 747.548   5
   4   1  -4 39905.0 793.297   3
  -4  -1   4 38209.4 773.142   6
  -4   1   4 39798.5 835.686   6
   4  -1  -4 38427.7 829.651   3
   4  -1  -3 49396.8 890.989   5
   4   1  -3 50489.8 918.553   5
  -4   1   3 49344.6 875.196   5
   4   1  -3 50280.5 958.857   4
   4  -1  -3 49820.0 951.282   6
   4   1  -3 50258.6 921.858   2
  -4  -1   3 49223.6 943.360   2
  -4   1   3 49823.9 880.837   2
  -4   1   3 49547.9 960.749   4
   4  -1  -3 48549.2 861.645   2
   4   1  -3 49758.5 850.862   3
  -4  -1   3 50321.9 896.112   5
  -4  -1   3 49171.6 849.482   3
   4  -1  -3 48062.4 975.613   4
   4   1  -3 50643.2 887.674   6
   4  -1  -2 164956. 2336.15   2
  -4   1   2 172122. 2492.81   4
  -4   1   2 167599. 2365.02   2
  -4  -1   2 171909. 2428.73   5
   4   1  -2 178832. 2415.56   2
  -4  -1   2 148929. 2257.13   1
  -4   1   2 167565. 2420.40   5
   4  -1  -2 169370. 2511.52   4
   4  -1  -2 166976. 2435.10   5
   4   1  -2 165942. 2493.36   4
   4   1  -2 174116. 2247.62   3
   4   1  -2 169220. 2459.19   5
   4  -1  -1 269710. 3696.01   5
  -4   1   1 266868. 3680.27   5
  -4   1   1 272781. 3626.64   1
   4   1  -1 273459. 3718.76   5
   4  -1  -1 269057. 3723.57   4
   4   1  -1 249053. 3518.25   1
  -4   1   1 259419. 3714.13   4
  -4  -1   1 263638. 3680.80   5
  -4  -1   1 257493. 3513.03   1
   4  -1   0 24543.1 642.920   5
   4   1   0 22978.2 547.941   1
  -4   1   0 23741.0 627.107   5
   4   1   0 23749.2 643.928   5
  -4  -1   0 22015.9 535.410   1
   4  -1   0 23936.6 644.222   4
  -4   1   0 22922.4 596.705   1
  -4  -1   0 23561.1 607.076   5
   4  -1   0 23761.0 620.630   1
  -4  -1  -1 172.795 105.831   5
  -4   1  -1 29.4977 84.9333   1
   4  -1   1-43.5261 106.306   4
   4   1   1 77.9574 141.156   5
   4  -1   1-18.2651 107.775   1
  -4  -1  -1 101.710 76.8116   1
  -4   1  -1 152.806 99.7038   5
   4   1   1 79.0295 107.614   1
  -4   1  -2 31477.3 792.279   5
   4  -1   2 29136.5 812.919   1
  -4   1  -2 30683.2 767.108   1
   4   1   2 29474.4 774.082   1
  -4  -1  -2 30398.7 772.744   5
   4  -1   2 31486.6 773.683   4
   4   1   2 31183.5 818.148   5
  -4  -1  -2 29524.1 728.585   1
  -4   1  -3 19952.2 627.350   5
  -4   1  -3 19227.0 616.669   1
   4  -1   3 18967.7 647.780   1
  -4  -1  -3 20714.7 621.811   5
   4   1   3 19070.6 655.120   1
   4   1   3 19458.2 651.662   5
   4  -1   3 18391.1 595.989   4
  -4  -1  -3 20424.9 611.263   1
   4   1   4 3902.91 326.836   1
   4  -1   4 3537.84 320.477   1
   4   1   4 3425.31 284.832   5
   4  -1   5 561.099 184.106   1
   4   1   5 524.591 187.627   1
   4  -1   6 24825.4 904.480   1
   4   1   6 22957.5 864.759   1
   4  -1   7 11322.3 627.960   1
   4   1   7 11051.1 620.352   1
   4  -1   8 7855.33 569.481   1
   4   1   8 7073.44 540.841   1
   4  -1   9 104.459 222.509   1
   4   1   9 174.807 179.706   1
   4  -1   9 22.5379 109.978   4
   4  -1  10 16982.3 891.260   1
   4  -1  10 15440.1 619.880   4
   4   1  10 15692.0 859.832   1
   4  -1  11 2713.08 262.371   4
   4   1  11 3085.86 420.306   1
   4  -1  11 3131.28 441.657   1
   4   1  12 6422.95 627.034   1
   4  -1  12 7892.28 660.472   1
   4   1  13 623.825 254.925   1
   4  -1  13 306.515 233.349   1
   4   1  14 5689.92 652.201   1
   4  -1  14 6449.52 651.417   1
   4  -1  15 3420.20 521.226   1
   4   1  15 2938.21 474.660   1
  -4   2  19 1213.56 361.096   1
  -4  -2  19 762.596 300.924   1
  -4  -2  18 2022.15 386.679   1
  -4   2  18 2374.54 423.533   1
  -4   2  17 0.60194 216.326   1
  -4  -2  17 618.881 268.213   1
  -4  -2  16 465.267 238.752   1
  -4   2  16 154.697 209.988   1
  -4  -2  15 1303.90 305.725   1
  -4   2  15 1502.84 325.215   1
  -4   2  14 2599.40 388.787   1
  -4  -2  14 2228.02 340.090   1
  -4  -2  13 4412.30 423.610   1
   4   2 -13 3899.23 199.548   5
  -4   2  13 4628.36 449.892   1
  -4  -2  12 3115.19 350.227   1
   4   2 -12 2565.26 165.541   5
  -4   2  12 2568.45 210.629   4
  -4   2  12 2983.25 361.656   1
   4   2 -11 1920.88 143.827   5
  -4   2  11 1996.67 188.216   4
  -4  -2  11 1972.32 118.276   4
  -4   2  11 1736.00 297.359   1
  -4  -2  11 1887.92 257.618   1
  -4  -2  10 2896.02 304.409   1
   4   2 -10 2812.81 169.999   5
  -4  -2  10 3094.63 152.631   4
  -4   2  10 2524.28 204.236   4
  -4   2  10 2640.29 299.121   1
   4  -2  -9 8.88161 156.036   3
   4   2  -9 259.823 73.2753   5
  -4   2   9 225.167 146.481   1
  -4  -2   9 298.509 122.548   1
  -4   2   9 218.682 95.3531   4
  -4  -2   9 273.239 63.1810   4
  -4  -2   8 3074.87 243.248   1
   4   2  -8 3269.64 178.355   5
  -4   2   8 3302.60 220.798   4
  -4  -2   8 3467.98 174.819   4
   4  -2  -8 3406.45 315.895   3
   4   2  -7 786.128 109.862   5
   4  -2  -7 581.356 160.550   3
   4   2  -7 608.651 102.115   4
  -4   2   7 361.408 98.4536   4
  -4  -2   7 687.380 98.1407   4
  -4  -2   7 849.443 160.272   1
   4   2  -6 4283.91 209.315   4
   4   2  -6 4167.86 204.953   5
  -4  -2   6 4342.31 264.330   3
  -4   2   6 3898.52 235.050   4
  -4   2   6 4137.70 269.957   6
  -4  -2   6 4142.83 243.413   1
  -4   2   6 4197.13 266.297   3
   4  -2  -6 4278.30 292.314   3
   4  -2  -5 98.9077 119.173   6
  -4   2   5 49.5605 84.3670   6
  -4  -2   5 140.211 84.7582   3
  -4  -2   5 74.6820 114.230   2
   4   2  -5-15.0134 70.7879   5
  -4  -2   5 69.7642 71.1158   5
  -4  -2   5 75.7403 80.8982   6
  -4   2   5 84.7115 81.8032   4
  -4  -2   5 48.6459 71.3683   1
  -4   2   5 70.5498 41.8992   5
   4   2  -5 44.6621 75.7648   4
   4  -2  -5 251.819 115.246   3
   4  -2  -5 11.1092 96.8066   4
   4  -2  -4 4833.81 270.462   3
  -4   2   4 4556.05 256.287   4
  -4  -2   4 4881.49 227.939   5
   4   2  -4 4764.73 233.375   5
  -4  -2   4 4811.59 268.522   2
  -4   2   4 4998.89 229.225   2
  -4  -2   4 4539.91 218.076   6
   4  -2  -4 4917.40 282.484   6
   4   2  -4 5055.01 248.727   4
  -4   2   4 5023.58 195.725   5
  -4  -2   4 5015.73 227.361   3
   4  -2  -4 4601.32 265.360   4
   4   2  -3 2610.64 196.280   2
  -4  -2   3 2521.81 206.398   2
  -4  -2   3 2530.03 171.871   5
  -4   2   3 2284.79 143.973   2
   4   2  -3 2711.51 198.623   4
  -4   2   3 2685.02 201.238   4
  -4  -2   3 2702.69 142.488   3
   4  -2  -3 2695.86 146.465   2
   4   2  -3 2788.55 189.264   5
   4   2  -3 2784.36 155.728   6
  -4   2   3 2879.91 167.143   5
   4  -2  -3 3039.57 216.561   4
  -4  -2   2 3633.06 250.119   2
  -4  -2   2 4111.71 139.140   3
   4   2  -2 4384.17 243.897   5
   4  -2  -2 3949.84 171.533   2
   4  -2  -2 4060.80 259.199   4
   4   2  -2 3905.86 226.435   2
  -4   2   2 3811.83 242.446   4
  -4  -2   2 4150.37 146.270   1
  -4   2   2 4322.84 222.765   5
  -4  -2   2 4067.76 228.671   5
  -4  -2   1 118118. 1827.08   5
   4   2  -1 117412. 1860.90   5
  -4   2   1 115259. 1811.94   5
  -4   2   1 121577. 1850.22   4
   4   2  -1 110907. 1796.23   2
   4  -2  -1 115726. 1871.10   4
   4   2  -1 108460. 1633.02   1
  -4   2   1 116575. 1803.25   1
  -4   2   0 2054.71 183.532   1
  -4   2   0 2356.25 188.347   4
  -4  -2   0 1785.74 142.691   1
   4   2   0 2093.94 198.776   5
  -4  -2   0 2596.24 199.396   5
   4  -2   0 1863.99 189.502   1
   4  -2   0 2252.88 204.489   4
  -4   2   0 2385.50 198.393   5
   4   2   0 2029.75 144.963   1
   4  -2   1 14134.9 520.966   1
  -4  -2  -1 14385.2 426.586   1
  -4  -2  -1 14727.9 492.090   5
   4   2   1 14267.2 451.570   1
  -4   2  -1 13963.3 476.496   1
   4  -2   1 15048.4 489.281   4
  -4   2  -1 14986.0 499.009   5
   4   2   1 14429.1 517.086   5
  -4   2  -2 10355.9 437.793   5
   4  -2   2 10213.3 424.476   4
  -4  -2  -2 10363.1 430.775   5
   4  -2   2 11429.4 475.616   1
   4   2   2 9882.85 449.087   5
  -4  -2  -2 9906.30 384.738   1
   4   2   2 9740.94 406.806   1
  -4   2  -2 10502.4 429.488   1
   4  -2   3 6915.70 406.527   1
  -4  -2  -3 6296.95 338.353   5
  -4  -2  -3 5943.21 319.307   1
   4   2   3 6185.60 366.320   5
   4  -2   3 6126.08 331.671   4
  -4   2  -3 6512.12 349.441   5
   4   2   3 6297.79 261.208   3
   4   2   3 5855.30 348.604   1
   4  -2   4 10141.6 517.280   1
   4   2   4 10372.0 482.588   5
   4   2   4 9685.87 478.264   1
   4  -2   4 9760.30 415.926   4
   4   2   4 9946.30 369.410   3
   4  -2   5 323.479 196.447   1
   4  -2   5 150.954 110.453   4
   4   2   5 89.6043 131.054   5
   4   2   5 144.508 151.227   1
   4   2   5 102.081 82.1243   3
   4  -2   6 2023.47 216.874   4
   4   2   6 1711.52 266.770   1
   4  -2   6 2004.60 290.908   1
   4   2   7 1015.05 232.834   1
   4  -2   7 1548.21 281.540   1
   4  -2   7 1045.19 161.812   4
   4   2   8 2834.71 356.733   1
   4  -2   8 2814.33 386.734   1
   4  -2   8 3184.28 267.357   4
   4  -2   9 26302.3 1069.07   1
   4   2   9 24787.0 1030.45   1
   4  -2   9 24177.9 754.521   4
   4  -2  10 425.463 259.759   1
   4  -2  10 404.485 141.457   4
   4   2  10 314.931 225.996   1
   4  -2  11 1281.76 346.137   1
   4   2  11 1353.05 321.332   1
   4  -2  11 1915.40 225.692   4
   4   2  12 67.2499 227.750   1
   4  -2  12-100.839 221.979   1
   4   2  13-23.7834 249.993   1
   4  -2  13 94.3892 222.389   1
   4  -2  14 1466.41 366.146   1
   4   2  14 1951.12 410.581   1
   4  -2  15 254.335 270.705   1
   4   2  15 282.892 265.288   1
  -4   3  19 2215.27 427.329   1
  -4  -3  19 1841.85 384.810   1
  -4   3  18 75.0227 242.183   1
  -4  -3  18 736.747 298.998   1
  -4  -3  17 2125.51 377.618   1
  -4   3  17 2866.72 443.452   1
  -4  -3  16 797.245 270.292   1
  -4   3  16 959.591 289.498   1
  -4   3  15 7148.47 597.371   1
  -4  -3  15 6895.87 572.838   1
  -4  -3  14 74.5343 207.072   1
  -4   3  14-150.505 209.451   1
  -4   3  13 14859.5 800.195   1
  -4  -3  13 14003.0 733.001   1
  -4  -3  12 5909.77 453.899   1
  -4   3  12 6063.09 490.045   1
  -4   3  11 16696.5 761.505   1
  -4  -3  11 17908.8 735.223   1
  -4   3  10 315.026 174.759   1
   4   3 -10 427.669 98.5364   5
  -4  -3  10 171.711 126.119   1
  -4   3  10 414.189 108.036   4
   4  -3 -10 1066.98 227.095   3
   4   3  -9 20896.4 541.820   5
   4  -3  -9 20856.1 797.004   3
  -4   3   9 21193.0 625.362   4
  -4  -3   9 21127.8 698.173   1
  -4   3   9 21737.5 802.752   1
  -4  -3   8 6147.19 339.771   1
   4   3  -8 6717.55 286.459   5
   4  -3  -8 7168.50 430.822   3
  -4   3   8 6383.95 321.151   4
  -4  -3   7 13628.1 474.456   1
   4   3  -7 13700.6 359.389   4
   4   3  -7 13257.4 408.056   5
   4  -3  -7 15091.2 580.233   3
  -4   3   7 13342.6 475.971   4
  -4  -3   6 312.205 99.4725   1
   4   3  -6 308.511 95.9768   5
   4  -3  -6 437.640 145.623   3
  -4  -3   6 294.805 105.021   3
  -4   3   6 423.537 109.212   4
   4   3  -6 355.766 81.5246   4
   4  -3  -5 11110.9 445.195   3
   4   3  -5 11311.7 377.318   5
  -4   3   5 11511.8 440.998   6
   4   3  -5 10255.4 354.681   4
   4  -3  -5 11290.9 462.963   6
  -4  -3   5 11426.8 331.968   1
  -4  -3   5 11178.2 385.371   3
  -4   3   5 11231.5 416.497   4
  -4  -3   5 9528.92 439.738   2
  -4   3   5 10922.6 278.762   5
  -4   3   4 10043.1 303.552   5
   4  -3  -4 10900.9 427.488   6
   4   3  -4 10421.1 368.337   5
  -4  -3   4 11005.1 420.692   2
   4   3  -4 11034.3 404.823   2
  -4  -3   4 10834.1 266.280   1
   4  -3  -4 10948.8 414.210   4
   4   3  -4 10273.0 362.360   4
  -4  -3   4 10464.4 335.251   3
  -4   3   4 9884.07 386.399   4
  -4   3   4 10292.6 315.734   2
  -4  -3   4 10810.8 363.318   5
  -4  -3   4 10621.2 319.545   6
   4  -3  -3 2718.92 225.726   4
   4   3  -3 3105.47 207.584   5
  -4  -3   3 2599.79 214.056   2
   4   3  -3 2942.07 206.724   2
  -4   3   3 2804.31 148.411   2
  -4   3   3 2882.97 216.934   4
  -4  -3   3 3053.83 199.663   5
  -4  -3   3 2983.36 149.030   3
  -4  -3   2 876.887 157.544   2
  -4  -3   2 761.336 118.190   5
   4   3  -2 867.680 125.305   2
   4  -3  -2 988.368 90.5037   2
   4  -3  -2 927.435 152.937   4
  -4   3   2 852.952 135.537   4
  -4  -3   2 1040.76 69.4600   3
   4   3  -2 1068.84 156.000   5
   4   3  -1 54677.2 1067.66   2
   4   3  -1 56292.2 867.294   1
  -4   3   1 58415.2 1090.87   1
  -4  -3   1 55578.1 1076.92   5
  -4   3   1 55547.7 1097.45   4
   4  -3  -1 56050.3 1122.15   4
   4   3  -1 56545.2 1114.99   5
  -4  -3   1 55665.5 854.742   1
   4   3   0 9015.78 291.142   1
   4  -3   0 9567.00 382.091   4
  -4  -3   0 8498.61 278.404   1
  -4   3   0 9289.91 372.264   4
   4   3   0 9215.11 401.978   5
   4  -3   0 9234.83 387.158   1
  -4   3   0 9158.40 374.901   1
  -4  -3   0 9273.06 377.199   5
   4  -3   1 90504.0 1623.40   1
  -4   3  -1 87476.4 1550.55   1
   4   3   1 88888.5 1603.16   5
  -4  -3  -1 87214.1 1546.41   5
   4  -3   1 88067.8 1544.75   4
   4   3   1 85379.9 1227.07   3
   4   3   1 86725.8 1445.19   1
  -4   3  -1 89840.3 1532.24   4
   4   3   2 462.923 76.6014   3
   4  -3   2 906.389 211.028   1
   4   3   2 286.972 115.384   1
  -4  -3  -2 422.358 104.418   1
  -4   3  -2 1289.16 192.348   1
   4   3   2 500.435 160.968   5
   4  -3   2 638.620 158.755   4
  -4  -3  -2 472.872 120.170   5
   4   3   3 19756.5 674.811   5
  -4  -3  -3 20409.7 614.083   5
   4  -3   3 19985.4 707.080   1
   4  -3   3 20185.9 602.849   4
   4   3   3 18299.5 633.199   1
  -4  -3  -3 19334.2 594.661   1
   4   3   3 19361.7 486.651   3
   4  -3   4 6698.75 428.732   1
   4   3   4 6314.33 394.739   5
   4   3   4 6565.64 296.844   3
   4  -3   4 6755.95 343.420   4
   4   3   4 6785.30 396.702   1
   4   3   5 25495.1 672.709   3
   4  -3   5 26458.9 900.765   1
   4  -3   5 25034.4 704.721   4
   4   3   5 24055.8 825.096   1
   4   3   5 25254.6 812.312   5
   4   3   6 631.087 164.990   5
   4   3   6 447.974 170.741   1
   4  -3   6 518.945 129.266   4
   4  -3   6 712.296 212.089   1
   4  -3   7 13517.2 701.761   1
   4  -3   7 12334.7 499.507   4
   4   3   7 13735.1 677.118   1
   4  -3   8 947.770 255.605   1
   4   3   8 1315.09 268.057   1
   4  -3   8 1134.52 171.739   4
   4  -3   9 20705.6 952.380   1
   4   3   9 20248.5 931.483   1
   4  -3   9 18721.3 634.471   4
   4  -3  10 179.787 124.210   4
   4   3  10-148.740 233.254   1
   4  -3  10-381.337 242.106   1
   4   3  11 23935.6 1099.61   1
   4  -3  11 23010.5 1092.03   1
   4  -3  12 2289.49 431.128   1
   4   3  12 2311.47 412.847   1
   4   3  13 4684.33 539.053   1
   4  -3  13 4402.23 547.123   1
   4  -3  14 98.6206 279.086   1
   4   3  14-348.371 304.323   1
   4  -3  15 4567.15 593.931   1
   4   3  15 5203.18 619.632   1
  -4   4  19 688.334 312.944   1
  -4  -4  19 1051.18 329.726   1
  -4   4  18 425.499 304.093   1
  -4  -4  18 7.11782 234.220   1
  -4  -4  17 1685.78 325.179   1
  -4   4  17 1927.97 385.529   1
  -4   4  16-219.541 245.172   1
  -4  -4  16-271.334 210.995   1
  -4   4  15 72.2859 221.944   1
  -4  -4  15-86.0113 198.104   1
  -4  -4  14-70.7871 215.934   1
  -4   4  14 81.7378 197.016   1
  -4   4  13 3299.66 395.551   1
  -4  -4  13 3492.08 384.728   1
  -4  -4  12 29.2295 156.047   1
  -4   4  12 182.670 181.882   1
  -4  -4  11 313.092 149.821   1
  -4   4  11 131.233 164.489   1
   4  -4 -11 429.117 193.067   3
  -4  -4  10 6951.58 431.930   1
   4  -4 -10 8375.16 528.785   3
  -4   4  10 7009.34 487.267   1
   4   4  -9 6536.07 314.391   5
   4  -4  -9 7084.51 455.739   3
  -4  -4   9 6543.34 375.239   1
   4  -4  -8 279.207 180.259   3
   4   4  -8 203.116 49.9004   4
  -4   4   8 117.373 88.5268   4
   4   4  -8 169.121 89.7959   5
  -4  -4   8 169.589 92.3354   1
  -4  -4   7 32544.4 775.056   1
   4   4  -7 32858.7 622.653   4
  -4   4   7 31874.7 813.967   4
   4   4  -7 30790.4 737.935   5
   4  -4  -7 31811.7 913.919   3
  -4   4   6 97.6212 98.8178   4
  -4  -4   6 143.119 92.4637   1
   4   4  -6 52.5837 100.984   5
  -4  -4   6 191.295 148.153   2
   4   4  -6 88.3743 75.1864   4
  -4   4   6 52.0849 33.1053   5
   4  -4  -6-53.4425 129.896   3
   4  -4  -5 2699.88 249.982   6
   4   4  -5 3100.61 217.287   5
   4  -4  -5 3038.79 248.964   3
  -4   4   5 2983.52 232.296   4
  -4  -4   5 3159.59 276.096   2
   4   4  -5 3228.84 195.089   4
  -4   4   5 3028.40 239.666   6
  -4  -4   5 3151.02 166.155   1
  -4  -4   4 293.652 51.8133   1
  -4   4   4 236.790 107.458   4
  -4  -4   4 67.7973 84.1687   5
  -4  -4   4 204.024 132.729   2
   4  -4  -4 231.541 122.976   6
   4   4  -4 142.924 98.4101   2
  -4  -4   4 129.402 62.2699   6
   4   4  -4 207.008 105.076   5
   4  -4  -3 657.897 153.069   4
   4   4  -3 906.094 143.794   5
  -4   4   3 1003.81 85.0455   2
  -4  -4   3 844.968 125.834   5
  -4  -4   3 865.711 175.048   2
  -4   4   3 877.760 140.328   4
   4   4  -3 1038.10 145.097   2
  -4  -4   2 11146.8 434.934   2
  -4   4   2 11354.3 420.194   4
   4  -4  -2 11039.9 432.340   4
   4   4  -2 10608.7 234.495   6
  -4  -4   2 11806.4 412.321   5
   4   4  -2 11571.1 423.712   5
   4  -4  -2 10994.5 247.426   2
   4   4  -2 10848.1 397.693   2
  -4   4   1 3981.96 252.448   1
   4   4  -1 3876.70 258.571   5
   4   4  -1 3917.01 144.552   1
   4  -4  -1 4122.52 271.346   4
  -4   4   1 4394.33 257.910   4
  -4  -4   1 4020.67 140.764   1
   4   4  -1 3566.23 240.897   2
  -4  -4   1 3922.27 243.615   5
   4  -4   0 11073.6 423.708   4
  -4   4   0 11177.4 413.879   4
   4   4   0 10823.2 442.386   5
  -4  -4   0 9978.59 301.328   1
  -4  -4   0 10839.8 411.853   5
   4   4   0 10037.9 313.100   1
   4  -4   0 11255.5 454.521   1
  -4   4   0 11729.1 438.712   1
  -4  -4  -1 195.884 72.4525   1
  -4  -4  -1 257.373 110.610   5
   4   4   1 201.671 91.7139   1
  -4   4  -1 481.759 165.958   1
   4   4   1 220.694 134.917   5
   4  -4   1 491.734 152.945   4
  -4   4  -1 485.595 128.374   4
   4  -4   1 563.264 202.354   1
   4   4   2 3234.85 279.902   5
  -4   4  -2 3187.07 248.600   1
   4  -4   2 3132.42 290.018   1
  -4  -4  -2 2967.08 240.299   5
   4  -4   2 3285.19 240.845   4
   4   4   2 3014.04 153.814   3
  -4   4  -2 3427.54 235.286   4
  -4  -4  -2 3351.68 214.356   1
   4   4   2 3011.58 230.503   1
   4  -4   3 16115.6 629.603   1
   4   4   3 15335.5 588.378   5
  -4  -4  -3 15440.7 542.554   5
  -4  -4  -3 15609.7 521.723   1
   4   4   3 15171.4 548.660   1
   4  -4   3 15179.1 516.894   4
   4   4   3 14952.6 414.928   3
   4  -4   4 7214.94 361.470   4
   4   4   4 6886.75 406.123   5
   4  -4   4 7599.38 478.832   1
   4   4   4 6533.78 397.784   1
   4   4   4 6543.37 290.656   3
   4   4   5 5117.93 374.741   1
   4  -4   5 5979.20 438.391   1
   4   4   5 5613.15 290.190   3
   4  -4   5 5678.32 315.385   4
   4   4   5 5672.90 382.456   5
   4   4   6 1430.68 242.267   1
   4  -4   6 1275.35 256.150   1
   4   4   6 1325.95 209.037   5
   4  -4   6 1225.23 166.354   4
   4   4   7 826.637 187.648   5
   4  -4   7 1055.56 244.495   1
   4  -4   7 1113.80 159.687   4
   4   4   7 785.362 231.936   1
   4   4   8 442.239 207.110   1
   4  -4   8 387.317 178.975   1
   4  -4   8 394.377 110.162   4
   4   4   9 673.264 241.420   1
   4  -4   9 502.778 254.020   1
   4  -4   9 548.811 121.186   4
   4  -4  10 6080.88 340.686   4
   4  -4  10 6432.56 568.267   1
   4   4  10 5951.99 538.494   1
   4   4  11 321.492 264.648   1
   4  -4  11 181.969 218.214   1
   4   4  12 190.889 241.533   1
   4  -4  12 929.343 325.857   1
   4  -4  13 273.873 234.924   1
   4   4  13-38.7112 268.798   1
   4   4  14-77.7178 259.679   1
   4  -4  14 627.568 300.588   1
   4  -4  15 783.901 307.930   1
   4   4  15 550.461 322.649   1
  -4   5  19 937.562 364.435   1
  -4  -5  19 1934.43 392.720   1
  -4   5  18 2143.14 422.493   1
  -4  -5  18 1748.19 366.990   1
  -4  -5  17 414.247 274.377   1
  -4   5  17 526.500 262.611   1
  -4   5  16 3281.13 461.303   1
  -4  -5  16 4560.65 495.007   1
  -4  -5  15 5043.61 489.432   1
  -4   5  15 4835.44 529.687   1
  -4  -5  14 4842.07 457.334   1
  -4   5  14 5256.21 531.916   1
  -4   5  13 675.319 230.909   1
  -4  -5  13 1116.66 248.217   1
  -4  -5  12 102.909 151.773   1
  -4   5  12 200.861 211.459   1
   4  -5 -12-2.62162 170.042   3
  -4  -5  11 123.364 154.570   1
   4  -5 -11 250.586 193.955   3
  -4   5  11-142.676 177.778   1
  -4   5  10 12042.4 640.314   1
  -4  -5  10 12562.9 572.143   1
   4  -5 -10 13296.0 662.455   3
  -4  -5   9 11003.6 491.617   1
   4  -5  -9 11445.3 584.054   3
   4  -5  -8 22232.8 799.971   3
   4   5  -8 22058.5 610.648   1
   4   5  -8 18983.1 405.441   4
   4   5  -8 21562.2 621.893   5
  -4  -5   8 22134.7 666.526   1
   4   5  -7 5130.69 295.246   5
   4  -5  -7 5896.37 387.815   3
   4   5  -7 5429.07 211.851   4
   4   5  -7 5260.61 263.207   1
  -4  -5   7 5608.99 286.225   1
  -4   5   6 64853.4 1329.32   4
   4  -5  -6 71291.8 1459.00   3
  -4  -5   6 69245.5 1436.54   2
   4   5  -6 70799.7 1160.09   4
   4   5  -6 68354.9 1303.94   5
   4   5  -6 68401.5 1162.29   1
  -4  -5   6 69195.1 1202.86   1
  -4  -5   5 49500.9 840.246   1
   4   5  -5 48670.6 1023.05   5
  -4  -5   5 48441.3 1080.96   2
   4  -5  -5 46261.9 1119.20   6
  -4   5   5 46516.2 1052.48   4
   4   5  -4 272.620 125.252   5
  -4  -5   4 275.625 44.6839   1
  -4   5   4 99.6383 87.1362   4
  -4  -5   4 288.943 142.871   2
   4   5  -4 271.515 118.107   2
   4  -5  -4 287.889 127.452   6
  -4  -5   3 2588.61 201.279   5
  -4  -5   3 2458.83 231.434   2
   4   5  -3 2593.93 228.689   5
  -4   5   3 2447.90 103.365   2
   4   5  -3 2326.83 210.798   2
  -4   5   3 2516.00 217.718   4
  -4  -5   3 2269.65 102.280   6
  -4  -5   2 18981.7 581.166   2
   4  -5  -2 18545.4 593.878   4
   4   5  -2 18287.2 546.625   2
  -4   5   2 18521.5 577.682   4
   4   5  -2 18222.3 576.736   5
  -4  -5   2 19830.1 568.546   5
  -4  -5   1 2022.06 188.258   5
   4   5  -1 1489.24 170.679   2
   4  -5  -1 1655.70 196.266   4
  -4   5   1 1860.51 186.777   4
   4   5  -1 1783.53 202.381   5
   4   5  -1 1599.77 97.3997   1
  -4   5   1 1647.17 188.745   1
  -4  -5   0 3614.15 125.840   3
   4   5   0 3659.66 275.643   5
   4   5   0 4096.56 191.134   1
  -4  -5   0 4070.44 260.629   5
  -4   5   0 4963.03 273.656   4
  -4   5   0 4236.83 278.493   1
   4  -5   0 4217.17 277.220   4
   4   5   1 21144.8 539.195   1
  -4  -5  -1 21971.1 641.870   5
   4   5   1 21151.7 682.073   5
  -4   5  -1 22167.3 621.140   4
   4  -5   1 21423.9 710.897   1
  -4  -5  -1 21296.4 419.797   3
  -4  -5  -1 21565.0 530.489   1
   4  -5   1 20929.2 618.293   4
  -4   5  -1 21338.1 656.577   1
   4   5   2 44779.4 1085.59   5
  -4  -5  -2 43565.8 922.196   1
  -4   5  -2 45515.6 968.792   4
   4   5   2 44657.3 954.902   1
   4  -5   2 44962.7 996.056   4
   4  -5   2 46405.7 1137.00   1
  -4  -5  -2 45399.5 1022.06   5
   4   5   3 21334.4 528.177   3
   4   5   3 21689.0 727.061   5
  -4   5  -3 22915.2 631.720   4
  -4  -5  -3 22371.0 643.124   1
   4   5   3 22253.4 679.961   1
   4  -5   3 22965.2 653.919   4
   4  -5   3 23342.4 795.757   1
   4   5   4 2925.47 271.970   1
   4   5   4 2785.90 192.151   3
   4  -5   4 3003.35 232.223   4
   4   5   4 3292.86 290.161   5
   4  -5   4 2830.62 312.019   1
   4   5   5 2558.39 278.050   5
   4   5   5 2613.47 274.349   1
   4  -5   5 3164.40 334.537   1
   4  -5   5 2724.45 227.758   4
   4   5   5 2609.22 203.698   3
   4   5   6 10644.2 543.936   5
   4  -5   6 11107.7 618.439   1
   4  -5   6 10871.8 444.929   4
   4   5   6 10479.0 566.889   1
   4   5   7 4567.38 366.637   5
   4  -5   7 4538.64 416.237   1
   4  -5   7 4585.67 287.767   4
   4   5   7 4743.63 408.375   1
   4  -5   8 4463.07 453.107   1
   4  -5   8 4551.03 290.002   4
   4   5   8 4726.48 384.563   5
   4   5   8 4687.15 440.227   1
   4  -5   9 1945.12 355.874   1
   4  -5   9 1825.93 189.014   4
   4   5   9 1976.70 322.092   1
   4  -5  10 8217.01 635.304   1
   4  -5  10 7146.01 353.500   4
   4   5  10 7746.42 606.582   1
   4   5  11 6510.54 608.491   1
   4  -5  11 5306.31 560.761   1
   4   5  12 8224.36 686.900   1
   4  -5  12 9687.80 753.119   1
   4  -5  13 2897.90 466.309   1
   4   5  13 3226.79 481.360   1
   4   5  14 4510.07 551.552   1
   4  -5  14 4067.98 538.851   1
   4  -5  15 1589.22 390.661   1
   4   5  15 2150.88 425.932   1
  -4  -6  19 394.074 254.714   1
  -4  -6  18 1201.75 320.378   1
  -4   6  18 1234.54 358.602   1
  -4   6  17-677.547 298.311   1
  -4  -6  17 43.1331 205.699   1
  -4   6  16 263.015 224.072   1
  -4  -6  16 448.990 249.204   1
  -4   6  15 623.780 265.240   1
  -4  -6  15 345.072 197.827   1
  -4   6  14 2428.88 385.298   1
  -4  -6  14 2481.95 344.819   1
  -4   6  13 1954.23 329.802   1
  -4  -6  13 2146.48 299.333   1
  -4   6  12 5081.19 471.359   1
   4  -6 -12 5320.45 471.984   3
  -4  -6  12 5322.53 432.800   1
  -4  -6  11 441.596 179.136   1
  -4   6  11 134.957 170.089   1
   4  -6 -11-12.8792 183.457   3
  -4  -6  10 14946.5 629.291   1
   4  -6 -10 14943.1 706.677   3
   4  -6  -9 925.599 214.040   3
  -4  -6   9 1202.51 193.671   1
   4  -6  -8 17266.0 701.871   3
  -4   6   8 14015.0 286.914   5
   4   6  -8 16129.3 558.824   5
  -4  -6   8 16280.7 559.438   1
   4   6  -8 15242.3 345.613   4
   4   6  -8 17090.4 521.534   1
   4  -6  -7 4411.96 345.543   3
   4   6  -7 3965.06 189.088   4
  -4   6   7 4260.59 168.879   5
   4   6  -7 3768.85 277.438   5
   4   6  -7 3842.15 227.409   1
  -4  -6   7 3502.75 224.443   1
  -4  -6   7 3427.93 312.525   2
   4   6  -6 1723.79 150.877   1
  -4  -6   6 2522.93 193.439   1
  -4  -6   6 1693.20 238.843   2
   4   6  -6 1555.14 224.930   5
   4  -6  -6 1138.16 202.178   6
   4  -6  -6 995.962 194.730   3
   4   6  -5 25120.0 502.633   1
  -4  -6   5 24865.7 749.568   2
   4   6  -5 25662.4 713.634   5
   4  -6  -5 25006.2 759.108   6
  -4  -6   5 24302.1 521.167   1
  -4  -6   4 2490.84 241.181   2
   4   6  -4 1860.76 201.460   5
  -4   6   4 2031.78 205.367   4
   4   6  -4 2134.36 96.9157   1
   4   6  -4 2275.23 207.699   2
  -4  -6   4 1979.42 105.346   1
   4  -6  -4 2159.04 236.213   6
  -4  -6   3 6361.69 325.301   5
  -4  -6   3 6324.51 348.332   2
   4   6  -3 6392.28 348.696   5
   4   6  -3 5934.57 322.354   2
  -4   6   3 5617.28 321.471   4
   4   6  -2 4687.94 316.650   5
  -4  -6   2 5216.48 295.923   5
   4   6  -2 4850.13 280.393   2
  -4   6   2 4807.90 290.917   4
  -4  -6   2 4445.70 305.934   2
   4  -6  -1 27610.8 760.219   4
   4   6  -1 27262.8 498.477   1
   4   6  -1 27260.8 712.683   2
   4   6  -1 28199.1 779.071   5
  -4   6   1 29077.2 749.378   4
  -4   6   1 29781.2 771.760   1
  -4  -6   1 29087.8 752.495   5
  -4   6   0 283.008 117.905   1
   4   6   0 710.642 188.725   5
  -4  -6   0 315.960 114.461   5
   4   6   0 301.470 121.978   2
   4  -6   0 284.568 140.579   4
  -4   6   0 302.949 111.748   4
   4   6   0 265.224 80.4155   1
   4  -6   1 695.533 149.835   4
  -4   6  -1 604.911 132.652   4
   4   6   1 468.024 111.366   1
  -4  -6  -1 516.240 117.763   5
   4  -6   1 289.317 150.865   1
  -4  -6  -1 540.425 72.6388   3
   4   6   1 428.133 154.995   5
  -4   6  -2 6326.25 322.401   4
   4   6   2 6348.39 323.598   1
   4  -6   2 6458.32 340.873   4
   4   6   2 6286.47 380.887   5
   4  -6   2 6755.67 415.022   1
  -4  -6  -2 6556.97 251.668   3
   4   6   3 5700.18 374.079   5
  -4  -6  -3 5680.74 260.448   3
   4   6   3 5591.61 328.120   1
   4  -6   3 5619.61 319.232   4
   4  -6   3 5629.87 415.271   1
  -4   6  -3 5855.98 308.756   4
   4   6   4 5616.16 355.061   1
   4  -6   4 5335.31 407.070   1
   4   6   4 4930.89 357.596   5
   4  -6   4 5047.37 300.579   4
  -4   6  -4 5312.21 287.592   4
   4   6   5 485.245 112.118   3
   4  -6   5 385.934 181.233   1
   4  -6   5 284.746 113.589   4
   4   6   5 289.056 168.212   1
   4   6   5 230.174 132.102   5
   4   6   6 2746.04 310.296   1
   4   6   6 2670.30 286.514   5
   4  -6   6 2685.36 317.702   1
   4  -6   6 2650.33 219.584   4
   4  -6   7 73.5155 198.469   1
   4  -6   7 52.2993 93.4637   4
   4   6   7 76.8785 152.960   5
   4   6   7-142.093 174.439   1
   4  -6   8-66.3810 90.5167   4
   4  -6   8 17.1476 185.772   1
   4   6   8 227.704 195.485   1
   4   6   8 195.744 154.203   5
   4   6   9 542.436 189.099   5
   4  -6   9 770.280 264.302   1
   4  -6   9 639.546 127.363   4
   4   6   9 349.768 192.631   1
   4   6  10 7027.55 578.258   1
   4  -6  10 7184.97 604.917   1
   4  -6  10 7189.11 340.823   4
   4  -6  11-185.765 238.201   1
   4   6  11-11.2477 203.853   1
   4   6  12 444.548 249.380   1
   4  -6  12 238.514 228.487   1
   4   6  13 480.615 268.414   1
   4  -6  13 464.575 250.039   1
   4   6  14 540.156 292.003   1
   4  -6  14 104.836 240.423   1
   4   6  15 136.735 244.806   1
   4  -6  15-290.203 247.077   1
  -4  -7  19 667.211 313.503   1
  -4   7  18 5125.54 590.983   1
  -4  -7  18 3655.15 475.726   1
  -4   7  17 841.190 324.169   1
  -4  -7  17 733.828 270.419   1
  -4  -7  16 4604.56 477.995   1
  -4   7  16 4407.70 547.116   1
  -4  -7  15-126.008 206.064   1
  -4   7  15-140.340 240.762   1
  -4   7  14 1139.07 289.725   1
  -4  -7  14 1116.16 233.140   1
  -4   7  13-13.7337 193.044   1
  -4  -7  13 395.927 208.308   1
   4  -7 -13 219.680 211.966   3
  -4  -7  12 4924.04 421.275   1
  -4   7  12 4568.00 463.368   1
   4  -7 -12 4044.14 428.406   3
  -4   7  11 987.446 248.123   1
   4  -7 -11 397.099 197.025   3
  -4  -7  11 961.852 209.598   1
  -4  -7  10 22530.0 788.806   1
   4  -7 -10 21956.6 899.159   3
   4  -7  -9 1395.60 256.211   3
  -4   7   9 1137.77 68.3505   5
  -4  -7   9 1791.99 217.778   1
   4   7  -8 29726.5 726.662   1
  -4  -7   8 28714.3 926.157   2
  -4   7   8 27588.0 537.293   5
  -4  -7   8 29673.1 790.638   1
   4   7  -8 30356.1 829.484   5
   4   7  -8 27607.3 548.722   4
   4  -7  -8 30243.2 962.221   3
   4   7  -7 9431.55 352.786   1
   4  -7  -7 10439.9 527.605   3
  -4  -7   7 9201.51 379.669   1
  -4   7   7 9421.09 295.133   5
   4   7  -7 9089.19 441.161   5
  -4  -7   7 9267.82 493.316   2
   4  -7  -6 15608.4 625.164   3
  -4  -7   6 14820.8 444.672   1
  -4  -7   6 15074.7 606.945   2
   4   7  -6 14906.1 411.776   1
   4   7  -6 14883.3 562.261   5
   4  -7  -6 14641.0 604.614   6
   4   7  -5 628.868 82.4365   1
   4   7  -5 634.219 155.254   5
  -4  -7   5 912.977 110.814   1
  -4  -7   5 623.927 178.069   2
   4  -7  -5 758.079 183.749   6
  -4  -7   4 1312.98 196.294   2
   4  -7  -4 1233.58 193.151   6
   4   7  -4 1587.77 210.402   5
   4   7  -4 1370.08 84.6964   1
   4   7  -3 6199.36 359.391   5
  -4  -7   3 5391.65 349.891   2
   4   7  -3 5915.26 316.493   2
   4   7  -2 33947.6 919.060   5
   4   7  -2 34486.2 844.495   2
  -4  -7   2 36123.4 883.927   5
  -4   7   2 36617.2 899.296   4
  -4  -7   2 35569.9 891.205   2
  -4   7   1 10324.1 432.304   4
   4   7  -1 9473.56 410.581   2
   4   7  -1 9443.91 458.812   5
   4   7  -1 9922.49 266.071   1
  -4   7   1 9739.82 441.266   1
   4   7   0 1149.37 192.062   5
  -4   7   0 1243.94 165.400   4
   4   7   0 1113.10 121.384   1
   4   7   0 1089.02 151.389   2
   4  -7   1 3783.80 272.027   4
  -4   7  -1 3746.67 254.728   4
   4   7   1 3393.33 224.177   1
  -4  -7  -1 3385.29 176.441   3
   4   7   1 3714.78 301.795   5
   4  -7   2 804.933 199.648   1
   4   7   2 840.665 147.122   1
   4  -7   2 741.448 143.713   4
  -4  -7  -2 841.991 110.310   3
   4   7   2 643.052 163.066   5
  -4   7  -2 980.003 149.891   4
   4   7   3 4970.86 351.776   5
  -4   7  -3 5470.71 300.797   4
   4  -7   3 5244.41 321.038   4
   4   7   3 4798.20 311.978   1
   4  -7   3 4919.49 385.554   1
  -4  -7  -3 4948.79 249.215   3
  -4   7  -4 31173.2 765.295   4
   4   7   4 29066.6 866.980   1
   4  -7   4 30554.0 798.127   4
  -4  -7  -4 28899.9 725.591   3
   4  -7   4 31115.6 1021.49   1
   4   7   4 29354.2 906.822   5
   4  -7   5 830.931 201.654   1
   4  -7   5 1039.53 155.906   4
   4   7   5 948.475 200.159   5
   4   7   5 883.344 210.584   1
   4   7   6 22818.9 834.481   5
   4   7   6 21564.7 839.968   1
   4  -7   6 23266.8 683.992   4
   4  -7   6 23408.7 956.229   1
   4   7   7 880.853 207.448   5
   4  -7   7 765.731 263.701   1
   4  -7   7 1130.71 164.757   4
   4   7   7 950.031 235.410   1
   4  -7   8 20265.0 609.129   4
   4  -7   8 20944.7 967.379   1
   4   7   8 19467.0 866.114   1
   4   7   8 21051.7 817.892   5
   4   7   9 248.178 139.977   5
   4  -7   9 332.205 216.225   1
   4  -7   9 369.617 102.131   4
   4   7   9 275.476 202.759   1
   4   7  10 11870.6 625.650   5
   4   7  10 10835.7 727.023   1
   4  -7  10 11706.4 779.799   1
   4   7  11 2065.39 371.399   1
   4  -7  11 2139.57 371.518   1
   4   7  12 8454.43 700.848   1
   4  -7  12 7822.82 675.590   1
   4  -7  13 1225.05 353.574   1
   4   7  13 996.993 303.291   1
   4  -7  14 4936.35 583.742   1
   4   7  14 4179.79 545.073   1
   4  -7  15 721.668 354.877   1
   4   7  15 830.622 330.188   1
  -4  -8  19 64.9625 230.376   1
  -4   8  18 99.9887 258.247   1
  -4  -8  18 120.629 222.701   1
  -4   8  17 1098.95 341.988   1
  -4  -8  17 1427.13 301.125   1
  -4  -8  16-33.3488 205.916   1
  -4   8  16 604.386 297.677   1
  -4  -8  15 284.866 192.029   1
  -4   8  15-409.221 266.448   1
  -4   8  14 732.338 280.249   1
  -4  -8  14 79.5714 158.996   1
  -4  -8  13 4478.20 414.072   1
  -4   8  13 4409.72 467.190   1
   4  -8 -13 4798.10 475.056   3
  -4   8  12 3598.34 421.952   1
  -4  -8  12 3191.88 340.326   1
   4  -8 -12 3572.21 392.650   3
  -4  -8  11 845.318 198.555   1
   4  -8 -11 812.715 248.528   3
   4  -8 -10 1860.32 280.954   3
  -4  -8  10 1796.92 229.018   1
   4   8  -9 1521.71 84.7391   4
  -4  -8   9 2073.58 233.684   1
   4  -8  -9 2257.76 290.226   3
  -4   8   9 1995.07 120.291   5
  -4  -8   9 2429.94 296.475   2
   4  -8  -8 46.7006 150.101   3
  -4  -8   8-174.307 166.224   2
  -4   8   8 112.509 62.0951   5
  -4  -8   8 11.0091 93.5418   1
   4   8  -8-21.3906 76.7843   1
   4   8  -8 97.6952 54.4483   4
   4   8  -7 328.858 140.670   5
   4   8  -7 268.808 84.9788   1
  -4  -8   7 221.098 162.829   2
  -4  -8   7 440.080 113.583   1
   4  -8  -7 223.271 142.081   3
   4   8  -6 5332.97 238.663   1
   4   8  -6 5654.94 365.792   5
  -4  -8   6 5380.86 379.798   2
  -4  -8   6 5602.42 274.851   1
   4  -8  -6 5076.38 378.383   6
  -4  -8   5 11574.7 534.763   2
   4   8  -5 12237.9 531.567   5
   4  -8  -5 11783.0 538.260   6
  -4  -8   5 11574.8 349.223   1
   4   8  -5 12257.5 332.610   1
   4   8  -4 176.025 52.4228   1
   4   8  -4 156.303 144.393   5
  -4  -8   4 162.279 150.542   2
   4  -8  -4-11.4878 133.440   6
   4   8  -3 400.053 141.411   5
  -4  -8   3 696.463 176.555   2
   4   8  -3 458.954 55.8849   1
   4   8  -2 1486.87 208.563   5
  -4  -8   2 1330.00 208.103   2
   4   8  -1 197.202 159.655   5
   4   8   0 718.064 105.775   1
   4   8   0 616.949 63.8428   6
  -4   8   0 644.617 142.941   4
   4   8   0 647.398 176.766   5
   4   8   1 2557.52 196.263   1
   4   8   1 2390.98 256.448   5
  -4   8  -1 2587.88 229.302   4
   4   8   2 138.435 149.098   5
  -4  -8  -2 147.536 73.5129   3
  -4   8  -2 249.754 105.863   4
   4   8   2 145.711 105.462   1
   4  -8   2 242.120 179.625   1
   4   8   3 441.903 146.946   5
  -4  -8  -3 164.826 94.8372   3
   4  -8   3 271.306 124.420   4
   4   8   3 109.819 113.336   1
  -4   8  -3 240.712 102.666   4
   4  -8   3 193.222 159.666   1
   4  -8   4 3.11516 147.160   1
   4   8   4-27.8193 116.977   1
   4  -8   4-54.9939 98.3370   4
  -4  -8  -4 69.9240 94.3214   3
  -4   8  -4 62.1275 86.9891   4
   4   8   4-61.5922 125.324   5
   4   8   5 176.450 163.534   5
   4  -8   5 127.888 182.145   1
   4   8   5-120.044 151.995   1
   4  -8   5 225.896 113.550   4
  -4   8  -5 41.8178 93.9654   4
  -4  -8  -5 213.985 108.815   3
   4   8   6 1317.79 228.057   1
   4  -8   6 1695.25 191.317   4
   4  -8   6 1898.18 320.810   1
   4   8   6 1754.30 262.492   5
   4   8   7 128.172 139.097   5
   4  -8   7 405.332 221.961   1
   4   8   7 341.323 187.493   1
   4  -8   7 327.681 116.829   4
   4   8   8 1589.29 261.343   5
   4  -8   8 1941.53 326.072   1
   4  -8   8 1801.46 185.670   4
   4   8   8 2241.59 324.565   1
   4  -8   9 4105.46 468.095   1
   4   8   9 3692.89 417.515   1
   4   8   9 4119.22 384.637   5
   4  -8  10 592.951 260.432   1
   4   8  10 60.0130 197.579   1
   4   8  10 353.116 188.934   5
   4  -8  11 60.6882 213.685   1
   4   8  11 159.992 219.285   1
   4   8  12 221.175 268.825   1
   4  -8  12-117.705 230.303   1
   4  -8  13 1337.36 375.427   1
   4   8  13 1147.24 316.173   1
   4  -8  14 552.631 306.903   1
   4   8  14-304.993 283.001   1
   4  -8  15-39.2151 274.213   1
   4   8  15 100.368 244.679   1
  -4  -9  19 3613.18 494.282   1
  -4  -9  18 10.4713 222.454   1
  -4   9  18 332.715 302.182   1
  -4   9  17 1156.86 339.944   1
  -4  -9  17 1714.10 336.174   1
  -4  -9  16-244.832 237.571   1
  -4   9  16 357.136 251.870   1
  -4  -9  15 5551.65 500.861   1
  -4   9  15 6014.40 602.333   1
  -4  -9  14 1239.37 266.039   1
  -4   9  14 879.503 260.852   1
   4  -9 -14 722.330 251.873   3
   4  -9 -13 11540.3 723.184   3
  -4  -9  13 10634.7 624.883   1
  -4   9  13 11483.9 744.166   1
   4  -9 -12 985.723 264.777   3
  -4  -9  12 1369.37 239.966   1
  -4   9  12 1251.03 301.056   1
  -4  -9  11 6361.09 436.203   1
   4  -9 -11 5975.02 494.791   3
   4  -9 -10 3008.48 355.254   3
  -4  -9  10 3408.69 298.012   1
  -4   9  10 2911.57 152.180   5
  -4  -9   9 20450.4 814.693   2
  -4  -9   9 20412.0 696.882   1
  -4   9   9 20492.9 482.085   5
   4   9  -9 17517.1 385.883   4
   4  -9  -9 19157.2 820.412   3
  -4  -9   8 4329.31 289.372   1
  -4   9   8 4249.96 225.931   5
  -4  -9   8 4042.07 355.211   2
   4   9  -8 3713.35 240.986   1
   4  -9  -8 4019.50 366.608   3
   4  -9  -7 10665.1 564.183   3
  -4  -9   7 11021.3 430.688   1
   4   9  -7 10797.0 387.787   1
   4   9  -7 10858.7 533.262   5
  -4  -9   7 10422.0 536.203   2
  -4  -9   6-16.1924 74.5880   1
  -4  -9   6-92.4338 138.463   2
   4   9  -6 275.362 145.446   5
   4   9  -6-126.394 76.0216   1
   4  -9  -6 116.600 138.616   6
   4   9  -5 19913.0 730.260   5
   4   9  -5 17403.1 438.715   1
   4  -9  -5 21851.6 744.946   6
  -4  -9   5 20686.7 716.874   2
  -4  -9   4 7514.72 428.531   2
   4   9  -4 7770.81 440.869   5
   4   9  -4 7256.84 241.278   1
   4  -9  -4 7611.85 418.952   6
   4   9  -3 189.764 53.8063   1
   4   9  -3 292.948 179.804   5
  -4  -9   3 270.969 170.002   2
   4   9  -2 6724.72 421.565   5
  -4  -9   2 7352.11 411.432   2
   4   9  -1 11405.5 536.998   5
   4   9   0 183.134 158.145   5
   4   9   1 5697.54 398.208   5
   4   9   1 5867.35 292.797   1
   4   9   1 5900.03 219.975   6
  -4  -9  -2 1561.50 153.632   3
   4   9   2 1516.88 235.541   5
   4   9   2 1661.05 185.176   1
   4  -9   2 1481.74 244.895   1
   4   9   3 3967.21 331.026   5
  -4  -9  -3 3482.61 230.430   3
   4   9   3 3574.97 275.335   1
   4  -9   3 3453.13 343.750   1
   4   9   4 23923.6 847.821   5
  -4  -9  -4 25251.6 691.102   3
  -4   9  -4 25180.7 699.587   4
   4   9   4 24152.7 789.455   1
   4  -9   4 25092.9 926.915   1
   4   9   5 23673.6 841.135   1
  -4   9  -5 26071.8 704.206   4
   4   9   5 23742.7 864.881   5
   4  -9   5 24683.3 958.526   1
  -4  -9  -5 25406.6 738.800   3
   4  -9   6 1971.11 321.364   1
   4   9   6 1734.84 257.310   1
   4   9   6 1544.33 246.714   5
  -4  -9  -6 1921.23 224.244   3
   4   9   7 28760.6 987.924   5
   4  -9   7 31653.2 1173.36   1
   4   9   7 27899.0 1013.05   1
   4   9   8 5927.73 447.826   5
   4   9   8 6505.15 511.455   1
   4  -9   8 6940.99 584.254   1
   4  -9   9 6496.25 567.728   1
   4   9   9 6122.93 521.463   1
   4   9   9 6272.83 464.786   5
   4   9  10-223.020 215.912   1
   4  -9  10 242.872 260.426   1
   4   9  10 32.4637 158.918   5
   4   9  11 12483.0 790.573   1
   4  -9  11 14321.5 884.773   1
   4   9  11 13220.8 678.703   5
   4  -9  12 351.992 258.173   1
   4   9  12 76.1265 244.917   1
   4  -9  13 5491.71 610.414   1
   4   9  13 4501.83 549.086   1
   4  -9  14 30.5314 256.083   1
   4   9  14-437.783 271.032   1
  -4 -10  19 1627.35 398.217   1
  -4 -10  18-187.507 234.793   1
  -4 -10  17 1584.76 334.279   1
  -4  10  17 1282.09 367.935   1
  -4 -10  16 36.8568 202.782   1
  -4  10  16 108.641 229.808   1
  -4 -10  15 466.551 225.720   1
  -4  10  15-34.2390 228.003   1
  -4 -10  14 255.383 190.584   1
   4 -10 -14 165.318 217.571   3
  -4  10  14 102.907 217.300   1
  -4  10  13 234.198 220.310   1
   4 -10 -13 481.086 213.552   3
  -4 -10  13 117.492 177.724   1
   4 -10 -12-5.21680 204.322   3
  -4 -10  12 159.984 184.059   1
  -4  10  12 422.289 219.555   1
  -4 -10  11 4492.82 376.138   1
  -4  10  11 3990.97 174.502   5
   4 -10 -11 4870.80 465.885   3
  -4 -10  11 5224.97 466.260   2
  -4 -10  10 2209.91 259.511   1
  -4 -10  10 2297.16 312.448   2
  -4  10  10 2393.23 157.359   5
   4 -10 -10 2340.04 327.500   3
   4 -10  -9 2992.79 342.479   3
  -4 -10   9 3175.32 359.914   2
  -4  10   9 3228.63 200.640   5
  -4 -10   9 3384.34 284.422   1
   4  10  -8-25.8313 83.6720   1
  -4 -10   8-164.729 99.5413   1
   4 -10  -8 59.0723 160.729   3
  -4 -10   8 13.9416 172.921   2
  -4  10   8 29.3413 72.5462   5
  -4 -10   7 5948.51 424.807   2
   4 -10  -7 5760.26 423.859   3
   4  10  -7 5629.44 275.468   1
   4  10  -7 5692.96 410.421   5
  -4 -10   7 5758.51 312.603   1
   4  10  -6 23.7036 62.3884   1
   4  10  -6-87.0103 139.885   5
  -4 -10   6 138.407 178.427   2
  -4 -10   6 79.5013 76.9713   1
   4 -10  -6 162.971 172.188   6
   4  10  -5 4195.83 344.911   5
   4  10  -5 4353.42 210.313   1
   4 -10  -5 4478.93 360.076   6
  -4 -10   5 4474.19 340.826   2
   4  10  -4 178.406 153.472   5
  -4 -10   4 87.3335 153.049   2
   4  10  -4 149.829 58.0149   1
   4 -10  -4 280.150 159.175   6
   4  10  -3 2144.63 139.033   1
  -4 -10   3 2203.62 247.209   2
   4  10  -3 1963.40 260.544   5
  -4 -10   2 21109.2 726.627   2
   4  10  -2 22766.0 794.576   5
   4  10  -1 11812.4 574.057   5
   4 -10   0 1601.88 103.681   2
   4  10   0 1923.85 260.730   5
   4  10   1 9460.08 291.346   6
   4  10   1 9517.67 380.831   1
   4  10   1 9578.73 516.719   5
   4  10   2 482.644 130.961   1
   4  10   2 265.381 145.404   5
   4  10   2 379.704 93.6700   6
  -4 -10  -2 108.425 88.8579   3
  -4 -10  -3 15133.3 510.294   3
   4  10   3 15234.3 659.966   5
   4  10   3 14821.7 568.811   1
   4 -10   3 15458.4 700.925   1
  -4 -10  -4 935.868 147.939   3
   4  10   4 801.678 195.534   5
   4 -10   4 1032.48 245.516   1
   4  10   4 789.339 182.461   1
   4  10   5 153.976 153.971   5
   4  10   5 339.638 167.462   1
  -4 -10  -5 193.954 101.841   3
   4 -10   5 377.419 174.374   1
   4 -10   6-71.9563 191.495   1
   4  10   6 121.579 166.266   5
   4  10   6 95.4560 149.641   1
  -4 -10  -6 126.058 121.246   3
  -4  10  -6 114.473 86.6506   4
   4  10   7 6964.25 486.359   5
   4  10   7 7265.41 513.080   1
   4 -10   7 7571.10 582.806   1
   4  10   8 4233.90 394.838   5
   4 -10   8 4465.95 496.494   1
   4  10   8 3910.20 409.554   1
   4  10   9-6.53441 166.817   5
   4 -10   9 508.425 267.525   1
   4  10   9 123.403 214.803   1
   4 -10  10 507.834 258.317   1
   4  10  10 324.349 233.660   1
   4  10  10 519.722 187.716   5
   4  10  11-173.755 163.799   5
   4 -10  11-228.031 227.606   1
   4  10  11 116.447 222.647   1
   4 -10  12 354.275 236.079   1
   4  10  12 399.116 249.105   1
   4  10  13-330.546 263.329   1
   4 -10  13 103.573 239.161   1
   4 -10  14-185.481 262.473   1
   4  10  14 213.647 276.809   1
  -4 -11  19 456.606 309.679   1
  -4 -11  18 1652.31 339.321   1
  -4 -11  17 3989.39 470.424   1
  -4  11  17 4147.61 572.518   1
  -4  11  16 449.070 284.287   1
  -4 -11  16 405.883 230.513   1
  -4 -11  15 395.053 222.927   1
  -4  11  15 318.968 239.394   1
   4 -11 -15 24.3406 235.622   3
  -4 -11  14 3855.90 404.217   1
  -4  11  14 3611.49 472.061   1
   4 -11 -14 3989.99 469.485   3
  -4 -11  13 9172.69 581.102   1
  -4  11  13 9153.60 702.683   1
   4 -11 -13 9376.75 670.082   3
  -4  11  12 7523.86 602.546   1
   4 -11 -12 6904.00 563.446   3
  -4 -11  12 7647.64 588.515   2
  -4 -11  12 6870.24 483.680   1
   4 -11 -11 2602.66 351.303   3
  -4 -11  11 2616.81 347.810   2
  -4 -11  11 1973.89 259.981   1
  -4 -11  10 3471.85 316.955   1
   4 -11 -10 3698.59 394.606   3
   4  11 -10 2719.11 105.094   4
  -4 -11  10 3228.35 359.481   2
  -4  11  10 4162.77 227.680   5
   4 -11  -9 2124.98 299.046   3
  -4  11   9 2625.80 195.412   5
  -4 -11   9 2642.33 254.914   1
  -4 -11   9 2546.68 320.379   2
   4 -11  -8 2959.56 334.206   3
  -4 -11   8 2423.81 300.835   2
   4  11  -8 2380.19 203.339   1
  -4  11   8 2615.94 214.383   5
   4  11  -8 2708.06 309.597   5
  -4 -11   8 2476.86 237.886   1
   4  11  -7 20174.7 789.444   5
  -4 -11   7 19988.1 781.887   2
  -4 -11   7 20017.0 617.108   1
   4  11  -7 20149.0 562.260   1
  -4 -11   6 21754.6 798.306   2
   4  11  -6 23013.7 835.255   5
   4 -11  -6 21390.6 810.846   6
   4  11  -6 20285.5 543.717   1
  -4 -11   5 6842.59 424.130   2
   4  11  -5 6564.61 442.955   5
   4  11  -5 7113.71 278.273   1
   4 -11  -5 6581.48 431.863   6
  -4 -11   4 1568.01 225.207   2
   4  11  -4 1542.54 124.177   1
   4  11  -4 1498.84 244.551   5
   4 -11  -4 1535.91 228.964   6
   4  11  -3 52926.8 1363.39   5
  -4 -11   3 53090.1 1291.54   2
   4  11  -3 55030.0 957.452   1
   4  11  -2 3981.89 352.555   5
   4  11  -1 18759.8 748.489   5
   4  11   0 19785.8 762.627   5
   4 -11   0 18663.9 398.237   2
   4  11   1 2776.40 318.488   5
   4  11   2 7983.09 305.481   6
   4  11   2 8057.25 391.715   1
   4  11   2 8130.51 496.768   5
   4  11   3 25630.6 646.282   6
   4  11   3 26676.8 926.201   5
   4  11   3 26124.6 795.438   1
  -4 -11  -3 26261.1 722.687   3
   4  11   4 10397.8 520.244   1
   4  11   4 9453.64 554.843   5
  -4 -11  -4 10737.5 458.633   3
   4 -11   4 11224.1 630.491   1
   4  11   5 5245.67 416.122   5
   4  11   5 4930.05 395.155   1
   4 -11   5 6104.61 487.704   1
  -4 -11  -5 5361.88 344.933   3
   4  11   6-141.637 160.143   5
   4  11   6 482.272 191.518   1
  -4 -11  -6 134.979 130.914   3
   4 -11   6 55.5247 189.430   1
  -4 -11  -7 1080.42 201.341   3
   4  11   7 1307.59 252.922   5
   4 -11   7 883.332 227.967   1
   4  11   7 961.433 241.792   1
   4  11   8 7978.20 533.858   5
   4  11   8 7172.92 537.574   1
   4 -11   8 7611.21 607.207   1
   4  11   9 10171.5 658.824   1
   4  11   9 9104.45 582.455   5
   4 -11   9 10172.7 729.599   1
   4  11  10 9611.55 674.771   1
   4 -11  10 10097.4 756.060   1
   4  11  10 11364.4 645.326   5
   4  11  11 6442.58 496.079   5
   4  11  11 6596.92 601.002   1
   4 -11  11 6483.84 638.216   1
   4 -11  12 4148.73 535.782   1
   4  11  12 3666.97 500.441   1
   4 -11  13 4602.59 576.163   1
   4  11  13 3614.20 495.552   1
   4  11  14 584.975 317.313   1
   4 -11  14 1701.28 414.613   1
  -4 -12  18 999.563 285.684   1
  -4 -12  17 207.759 237.229   1
  -4  12  17 115.118 241.599   1
  -4 -12  16 3089.83 400.270   1
  -4  12  16 2877.63 463.178   1
   4 -12 -15 1952.11 370.952   3
  -4  12  15 2534.60 434.099   1
  -4 -12  15 2505.74 401.819   2
  -4 -12  15 2028.85 335.206   1
  -4  12  14 289.856 280.053   1
  -4 -12  14-79.2366 200.129   1
  -4 -12  14 10.9168 218.163   2
   4 -12 -14 42.2014 208.126   3
  -4 -12  13 76.7851 157.669   1
  -4  12  13-170.084 230.244   1
  -4 -12  13-213.460 244.870   2
   4 -12 -13-294.493 234.240   3
  -4 -12  12-143.187 225.705   2
  -4 -12  12-93.3311 149.916   1
   4 -12 -12-250.429 211.235   3
  -4 -12  11 1163.65 274.188   2
  -4 -12  11 569.956 175.487   1
   4 -12 -11 1015.98 249.904   3
   4 -12 -10 14406.9 763.327   3
  -4  12  10 14841.7 482.795   5
  -4 -12  10 14537.1 636.066   1
   4  12 -10 12659.6 319.072   4
  -4 -12  10 14498.0 738.231   2
  -4 -12   9 3409.00 365.273   2
  -4  12   9 4356.88 276.130   5
   4 -12  -9 5009.78 451.323   3
  -4 -12   9 4309.31 328.717   1
  -4 -12   8 84.4715 112.205   1
   4 -12  -8-0.42543 161.871   3
  -4  12   8 82.9058 96.0585   5
  -4 -12   8 144.601 177.615   2
  -4  12   7 4979.93 321.915   5
   4  12  -7 5198.45 435.756   5
  -4 -12   7 5054.07 406.622   2
   4  12  -7 4907.23 264.420   1
  -4 -12   7 4991.38 303.735   1
   4  12  -6 1981.66 169.102   1
  -4 -12   6 1532.85 256.079   2
   4 -12  -6 2131.04 283.901   6
   4  12  -6 1932.22 281.928   5
   4  12  -5 2367.90 296.631   5
   4 -12  -5 2563.30 294.038   6
  -4 -12   5 2536.60 278.225   2
   4  12  -5 2570.42 172.850   1
   4 -12  -4 7110.41 445.822   6
  -4 -12   4 6890.21 429.338   2
   4  12  -4 7233.83 475.069   5
   4  12  -4 7482.57 286.892   1
   4  12  -3 7638.93 298.127   1
   4  12  -3 9551.69 545.674   5
  -4 -12   3 9060.94 489.114   2
   4  12  -2 3487.97 346.996   5
   4  12  -1-245.764 193.767   5
   4 -12   0 4001.84 166.675   2
   4  12   0 3949.10 369.952   5
   4  12   1 161.151 158.549   5
   4 -12   1 267.178 84.2018   2
   4  12   2 1912.56 212.426   1
   4  12   2 1830.85 278.156   5
   4  12   2 1813.09 147.423   6
   4  12   3 3958.51 368.133   5
   4  12   3 3324.47 283.664   1
   4  12   3 3603.06 229.732   6
  -4 -12  -3 3663.62 271.604   3
   4  12   4 6489.38 467.456   5
   4  12   4 6640.43 421.108   1
   4 -12   4 7091.71 513.449   1
  -4 -12  -4 7499.16 393.407   3
  -4 -12  -5 1496.51 208.761   3
   4  12   5 806.120 197.315   1
   4  12   5 1041.85 228.828   5
   4 -12   5 1105.56 253.954   1
   4 -12   6 2392.57 351.426   1
   4  12   6 2131.80 298.317   5
   4  12   6 2440.80 327.648   1
  -4 -12  -6 2814.57 279.077   3
  -4 -12  -7 218.873 134.572   3
   4 -12   7-100.368 203.112   1
   4  12   7 336.223 167.854   5
   4  12   7 43.5435 173.249   1
   4 -12   8 87.7112 195.818   1
   4  12   8 220.621 176.009   5
   4  12   8-85.9717 202.554   1
   4 -12   9 1407.47 322.465   1
   4  12   9 692.134 229.897   5
   4  12   9 958.766 258.325   1
   4  12  10-80.0502 169.309   5
   4  12  10 323.021 220.976   1
   4 -12  10 411.714 240.406   1
   4  12  11-285.722 263.891   1
   4  12  11-284.838 190.620   5
   4 -12  11 93.5636 231.430   1
   4 -12  12-301.753 283.205   1
   4  12  12 599.906 306.382   1
   4 -12  13 901.779 336.907   1
   4  12  13 338.945 232.153   1
   4 -12  14-210.474 252.153   1
   4  12  14-417.280 313.351   1
  -4 -13  17 163.914 215.039   1
  -4 -13  17-27.6104 250.436   2
  -4  13  16 3275.24 512.250   1
  -4 -13  16 3122.31 407.585   1
  -4 -13  16 4202.86 547.126   2
   4 -13 -16 3447.27 475.358   3
  -4 -13  15 96.9781 169.902   1
   4 -13 -15 249.153 223.338   3
  -4 -13  15 224.230 225.466   2
  -4  13  15-55.4375 252.168   1
   4 -13 -14 5549.28 543.668   3
  -4  13  14 5548.18 590.630   1
  -4 -13  14 5811.69 562.979   2
  -4 -13  14 5430.41 480.338   1
   4 -13 -13 231.187 203.118   3
  -4 -13  13 510.346 199.301   1
  -4 -13  13 206.886 226.558   2
  -4  13  13 34.3662 209.154   1
   4 -13 -12 16402.4 873.224   3
  -4 -13  12 16526.6 849.369   2
  -4 -13  12 15924.7 736.281   1
   4 -13 -11 973.740 254.811   3
  -4 -13  11 1162.22 230.570   1
  -4 -13  11 724.889 230.575   2
  -4 -13  10 3660.12 408.515   2
  -4  13  10 4329.45 276.577   5
  -4 -13  10 3742.53 328.450   1
   4 -13 -10 4297.78 434.857   3
  -4 -13   9 5169.09 437.648   2
   4 -13  -9 4673.75 437.572   3
  -4  13   9 4750.57 306.885   5
  -4 -13   9 4592.37 345.759   1
   4  13  -8 639.586 206.407   5
   4 -13  -8 744.011 223.885   3
  -4  13   8 781.706 144.810   5
  -4 -13   8 1017.63 254.797   2
  -4 -13   8 926.816 164.849   1
   4  13  -7 375.476 106.120   1
   4  13  -7 1003.03 242.069   5
  -4  13   7 1079.13 180.416   5
  -4 -13   7 790.918 197.799   2
   4  13  -6 22394.1 901.322   5
  -4 -13   6 24287.7 866.878   2
   4  13  -6 23413.5 615.084   1
   4 -13  -6 23318.1 885.035   6
  -4 -13   5 663.717 184.345   2
   4  13  -5 906.256 224.464   5
  -4  13   5 587.729 68.7866   2
   4  13  -5 705.040 100.332   1
   4 -13  -5 553.001 177.511   6
  -4 -13   4 26033.7 880.113   2
   4  13  -4 27618.3 641.758   1
   4 -13  -4 26612.4 899.666   6
   4  13  -4 27680.4 978.946   5
   4  13  -3 25.6561 67.7911   1
  -4 -13   3 94.4051 149.290   2
   4  13  -3 259.770 190.939   5
  -4 -13   3 57.0694 33.9711   6
   4  13  -2 33630.8 1102.07   5
   4  13  -2 33504.0 740.576   1
   4  13  -1 6106.29 463.582   5
   4 -13   0 52454.5 864.432   2
   4  13   0 53595.3 1431.15   5
   4  13   1 3333.55 350.671   5
   4 -13   1 3375.04 185.814   2
   4 -13   2 16034.3 485.069   2
   4  13   2 15734.5 726.910   5
   4  13   2 16484.8 598.531   1
  -4 -13  -3 2261.61 230.106   3
   4  13   3 2009.08 300.339   5
   4  13   3 2346.79 252.190   1
   4  13   3 1748.79 161.268   6
   4  13   4 4067.35 336.678   1
   4  13   4 3832.87 372.846   5
  -4 -13  -4 4194.05 309.471   3
  -4 -13  -5 83.2836 107.752   3
   4  13   5 208.721 154.512   1
   4 -13   5-245.153 204.174   1
   4  13   5-67.0331 151.381   5
   4  13   6 7677.07 522.329   5
   4 -13   6 7522.96 575.733   1
   4  13   6 7827.20 512.068   1
  -4 -13  -6 8800.82 470.022   3
   4  13   7 447.773 199.923   5
  -4 -13  -7 201.734 140.034   3
   4  13   7 257.033 194.761   1
   4 -13   7-163.688 212.083   1
   4  13   8 7884.58 552.627   5
   4  13   8 8621.48 597.462   1
   4 -13   8 9177.27 664.449   1
  -4 -13  -8 9125.42 521.834   3
   4  13   9 943.430 248.925   5
   4  13   9 734.947 241.578   1
   4 -13   9 875.387 284.330   1
   4  13  10 11004.9 658.365   5
   4  13  10 11853.0 746.319   1
   4 -13  10 12221.5 823.065   1
   4 -13  11-22.5905 286.955   1
   4  13  11-250.853 249.392   1
   4  13  11 52.6248 165.385   5
   4 -13  12 6248.10 637.277   1
   4  13  12 6305.03 618.997   1
   4 -13  13-11.9035 268.674   1
   4  13  13 198.877 233.475   1
   4  13  14 5739.78 622.170   1
  -4  14  16 4584.21 571.057   1
   4 -14 -16 3695.28 503.124   3
  -4 -14  16 4590.35 541.056   2
  -4 -14  15-250.606 235.671   2
   4 -14 -15 119.357 198.493   3
  -4 -14  15-144.080 190.256   1
[truncated: 8,300,738 more chars]
